# Supplementary material for: Lack of alpha1,2-fucosylation protects mice from bleomycin-induced lung fibrosis
Source: Research Square preprint supplement (doi:10.21203/rs.3.rs-6044497/v1), 2025-03-14
Supplement: Supplementary file 1 [file 7af3c572a63572d50d1851f8.xlsx]

## Sheet: Proteins
Checked	Protein FDR Confidence: Combined	Master	Accession	Description	Exp. q-value: Combined	Sum PEP Score	Coverage [%]	# Peptides	# PSMs	# Protein Unique Peptides	# Unique Peptides	# AAs	MW [kDa]	calc. pI	Score Sequest HT: Sequest HT	# Peptides (by Search Engine): Sequest HT	# Razor Peptides	Abundances (Normalized): F2: 129N, Sample, DFTKO ctrl, E173	Abundances (Normalized): F2: 130N, Sample, DFTKO ctrl, E172	Abundances (Normalized): F2: 131, Sample, DFTKO ctrl, E171	Abundances (Normalized): F2: 126, Control, DFTKO Day14, E302	Abundances (Normalized): F2: 127N, Sample, DFTKO Day14, E301	Abundances (Normalized): F2: 128N, Sample, DFTKO Day14, E273	Abundances (Normalized): F2: 127C, Sample, DFTKO Day7, E307	Abundances (Normalized): F2: 128C, Sample, DFTKO Day7, E296	Abundances (Normalized): F2: 129C, Sample, DFTKO Day7, E295	Abundances (Normalized): F1: 130C, Sample, MIX, MIX	Abundances (Normalized): F2: 130C, Sample, MIX, MIX	Abundances (Normalized): F1: 129N, Sample, WT ctrl, E199	Abundances (Normalized): F1: 130N, Sample, WT ctrl, E198	Abundances (Normalized): F1: 131, Sample, WT ctrl, E196	Abundances (Normalized): F1: 126, Control, WT Day14, E347	Abundances (Normalized): F1: 127N, Sample, WT Day14, E346	Abundances (Normalized): F1: 128N, Sample, WT Day14, E180	Abundances (Normalized): F1: 127C, Sample, WT Day7, E397	Abundances (Normalized): F1: 128C, Sample, WT Day7, E187	Abundances (Normalized): F1: 129C, Sample, WT Day7, E186	Abundance: F2: 129N, Sample, DFTKO ctrl, E173	Abundance: F2: 130N, Sample, DFTKO ctrl, E172	Abundance: F2: 131, Sample, DFTKO ctrl, E171	Abundance: F2: 126, Control, DFTKO Day14, E302	Abundance: F2: 127N, Sample, DFTKO Day14, E301	Abundance: F2: 128N, Sample, DFTKO Day14, E273	Abundance: F2: 127C, Sample, DFTKO Day7, E307	Abundance: F2: 128C, Sample, DFTKO Day7, E296	Abundance: F2: 129C, Sample, DFTKO Day7, E295	Abundance: F1: 130C, Sample, MIX, MIX	Abundance: F2: 130C, Sample, MIX, MIX	Abundance: F1: 129N, Sample, WT ctrl, E199
FALSE	High	Master Protein	P01027	Complement C3 OS=Mus musculus OX=10090 GN=C3 PE=1 SV=3	0	837.608	67	101	692	101	101	1663	186.4	6.73	2334.17	101	0	47466.4	55921	59413.8	92036.7	77521.3	136919	218658	232760	254399	103385	107599	35295.9	50301.5	46876.1	99168.8	144782	56264.6	242677	164052	168799	30097.7	18648.3	11700.2	21188.6	11715.4	53786	31103.4	42550.5	46347.9	33026.9	51883.2	35295.9
FALSE	High	Master Protein	P11276	Fibronectin OS=Mus musculus OX=10090 GN=Fn1 PE=1 SV=4	0	624.476	51	91	389	91	91	2477	272.4	5.59	1360.15	91	0	10411.4	12447.1	14424.1	36743.3	25936.1	91551.8	57337	86927.5	55845.1	35955	35747.5	7535.5	10605.7	13992.9	65487.7	108535	12871.4	126183	54037.7	31601.4	6601.7	4150.8	2840.5	8459	3919.6	35964.4	8156	15891.1	10174.2	11486	17237.1	7535.5
FALSE	High	Master Protein	P07724	Albumin OS=Mus musculus OX=10090 GN=Alb PE=1 SV=3	0	606.336	85	60	3849	59	60	608	68.6	6.07	11631.2	60	0	184664	282391	403817	277178	495856	771087	566224	619963	701465	457376	447494	193668	398390	305650	245395	813717	369482	569392	669640	806813	117093	94170.6	79522.7	63811.7	74936.3	302907	80543.6	113335	127797	146111	215777	193668
FALSE	High	Master Protein	P06684	Complement C5 OS=Mus musculus OX=10090 GN=C5 PE=1 SV=2	0	563.893	47	76	438	76	76	1680	188.8	6.81	1370.75	76	0	67695.6	74059	72055	52257.6	107067	48906.5	23000.9	24404.2	32383.9	51721.2	52073.4	58223.5	73048.8	67864.6	36926.8	45982.7	83153	31667.3	26379.7	25957.7	42924.7	24696.9	14189.6	12030.7	16180.5	19212	3271.8	4461.3	5899.9	16522.6	25109.3	58223.5
FALSE	High	Master Protein	Q8VDD5	Myosin-9 OS=Mus musculus OX=10090 GN=Myh9 PE=1 SV=4	0	508.489	49	99	247	79	79	1960	226.2	5.66	800.26	99	22	24389.5	20055.4	15030.4	46103.5	25246.6	16451.8	22321.1	23142.8	19482.8	25328.1	25044.3	32328.9	18158.4	15343.2	40977.1	18373.1	25190	22810.9	29716.2	19051.7	15465	6688	2959.9	10613.9	3815.4	6462.8	3175.1	4230.7	3549.5	8091.2	12076.1	32328.9
FALSE	High	Master Protein	P28665	Murinoglobulin-1 OS=Mus musculus OX=10090 GN=Mug1 PE=1 SV=3	0	507.789	45	56	392	34	34	1476	165.2	6.42	1348.94	56	28	14286.8	25396.7	19445.2	25244.2	26914.1	86435.8	116408	106517	100709	46522	58551	9114.8	17504.1	15875.5	52315	68580.6	23352.6	59560.7	111783	97879.4	9059	8469.2	3829.3	5811.7	4067.4	33954.7	16558.6	19472.3	18347.8	14861.7	28232.7	9114.8
FALSE	High	Master Protein	Q921I1	Serotransferrin OS=Mus musculus OX=10090 GN=Tf PE=1 SV=1	0	481.614	69	51	1195	49	49	697	76.7	7.18	3827.08	51	2	80061.2	110935	131883	134682	164590	275446	124427	129493	164672	152483	137838	85905.5	124820	116098	190473	241371	149325	163938	142676	164521	50765.5	36994.1	25971.4	31006.3	24873.7	108204	17699.4	23672.5	30000.9	48711.4	66464.1	85905.5
FALSE	High	Master Protein	Q61838	Pregnancy zone protein OS=Mus musculus OX=10090 GN=Pzp PE=1 SV=3	0	426.87	47	55	290	53	53	1495	165.7	6.68	1028.3	55	2	8253.6	13373.7	10645.5	17660.6	13195.7	68827.3	88533.5	82737.4	64694.3	37837.9	37787.8	7187.8	9896.9	11401.7	52340.7	48473.9	17130.4	50069.4	50571.2	81520.1	5233.5	4459.8	2096.4	4065.8	1994.2	27037.5	12593.6	15125.1	11786.4	12087.5	18220.9	7187.8
FALSE	High	Master Protein	P06909	Complement factor H OS=Mus musculus OX=10090 GN=Cfh PE=1 SV=2	0	395.504	60	54	218	54	54	1234	139	6.99	824.29	54	0	7772.6	11249.4	10744.1	22042.9	14437.1	42944.4	48527.6	54844.3	50261.8	32668.1	24257.6	7698.9	13194.8	11636.8	42879.3	70481.4	16120.4	89308.7	55586.4	40922.1	4928.5	3751.4	2115.8	5074.7	2181.8	16869.9	6902.9	10026	9157	10436	11696.8	7698.9
FALSE	High	Master Protein	P26039	Talin-1 OS=Mus musculus OX=10090 GN=Tln1 PE=1 SV=2	0	390.676	42	95	180	81	95	2541	269.7	6.18	539.24	95	0	15080.8	13220.1	9852.9	22117.2	11454.8	8302.8	9828.7	9307	8218	17036.8	13019.1	21232.8	14441.3	12663.8	32053.4	8966.5	17713.1	10304.5	13204.2	15872.9	9562.5	4408.6	1940.3	5091.8	1731.1	3261.6	1398.1	1701.4	1497.2	5442.5	6277.7	21232.8
FALSE	High	Master Protein	Q8BTM8	Filamin-A OS=Mus musculus OX=10090 GN=Flna PE=1 SV=5	0	373.229	39	86	169	76	76	2647	281	6.04	547.33	86	10	12929	8811.7	6858.9	16892.6	12506.9	11342.8	16540.3	16106.5	11990.5	13432.9	14625.3	14605.9	8068.2	8746.8	14032.2	8091.3	12685.6	10577.6	15581.1	21235.5	8198.1	2938.5	1350.7	3889	1890.1	4455.8	2352.8	2944.4	2184.5	4291.2	7052.2	14605.9
FALSE	High	Master Protein	Q61147	Ceruloplasmin OS=Mus musculus OX=10090 GN=Cp PE=1 SV=2	0	370.975	55	50	269	49	50	1061	121.1	5.85	858.96	50	0	14606.7	20070.1	23999.7	20099.6	27194.7	44495.2	64885.8	70735.2	74280.7	28702.6	40031.3	9830.1	15252.3	14427.2	19510.6	39979.7	18574.4	43188.2	51500	64295.5	9261.9	6692.9	4726.2	4627.3	4109.8	17479.1	9229.8	12931	13532.9	9169.2	19302.7	9830.1
FALSE	High	Master Protein	P01029	Complement C4-B OS=Mus musculus OX=10090 GN=C4b PE=1 SV=3	0	367.058	43	65	248	65	65	1738	192.8	7.53	743.76	65	0	12081.2	13554.2	15237.6	24557.5	20225	55390.2	47117.4	53910.5	60311.4	29198.8	29068.8	10652.5	15938.8	11777.2	46117.4	48464.5	13243.3	69056.3	35099.8	43575.2	7660.5	4520	3000.7	5653.6	3056.5	21759	6702.3	9855.3	10987.9	9327.7	14016.7	10652.5
FALSE	High	Master Protein	P20918	Plasminogen OS=Mus musculus OX=10090 GN=Plg PE=1 SV=3	0	364.981	74	50	265	49	49	812	90.7	6.6	898.39	50	1	12581.8	15813.1	16496.9	26005.7	20627.3	35250	40709.5	40492.1	45400.8	29157.8	24022.5	11734.9	18966.8	17390.7	43456.3	48175.4	23075.7	60723.6	43062.3	37466.8	7977.9	5273.3	3248.7	5987	3117.3	13847.3	5790.8	7402.3	8271.4	9314.6	11583.4	11734.9
FALSE	High	Master Protein	Q9JHU4	Cytoplasmic dynein 1 heavy chain 1 OS=Mus musculus OX=10090 GN=Dync1h1 PE=1 SV=2	0	362.202	22	104	172	104	104	4644	531.7	6.42	471.09	104	0	12602.1	10292.8	9272.5	17689.7	12021.2	9743.1	8867.7	9547.1	9754.9	13673	11354.4	14202.1	9567.9	10689	24742.5	8060.6	13430.5	11023.8	13849.3	14275.3	7990.8	3432.4	1826	4072.5	1816.7	3827.4	1261.4	1745.3	1777.2	4367.9	5475	14202.1
FALSE	High	Master Protein	P19096	Fatty acid synthase OS=Mus musculus OX=10090 GN=Fasn PE=1 SV=2	0	358.948	35	79	183	79	79	2504	272.3	6.58	552.21	79	0	16778.5	18098.8	12426.4	22648.4	16139.6	16507.6	10858.6	8904.9	11953.7	17354.2	15070	16977.7	13219	16223.2	25909.7	12535.8	16071.6	13336.8	14156.8	15546.7	10639	6035.5	2447.1	5214.1	2439.1	6484.7	1544.6	1627.9	2177.8	5543.9	7266.6	16977.7
FALSE	High	Master Protein	Q9JKF1	Ras GTPase-activating-like protein IQGAP1 OS=Mus musculus OX=10090 GN=Iqgap1 PE=1 SV=2	0	353.108	45	64	171	59	59	1657	188.6	6.48	582.74	64	5	22194.9	19556.7	13982.3	18237.4	16434.1	10310.5	7752.7	6610.2	7656.5	14396.4	16851.9	24991	14515.7	12318.5	13471.5	6194.9	17844.5	6070.6	6937.2	8542.9	14073.4	6521.7	2753.5	4198.6	2483.6	4050.3	1102.8	1208.4	1394.9	4599	8125.8	24991
FALSE	High	Master Protein	Q9QXS1	Plectin OS=Mus musculus OX=10090 GN=Plec PE=1 SV=3	0	335.896	21	102	153	98	98	4691	533.9	5.96	415.54	102	4	5518.5	5271.7	5323.3	8384.6	7072.3	8666.1	11882.9	11153.7	8926.6	11357.8	8318.5	8696.1	6362	8195.7	11896.7	7211.7	9006.4	9043.4	16442.2	22017.1	3499.2	1758	1048.3	1930.3	1068.8	3404.3	1690.3	2039	1626.3	3628.3	4011.1	8696.1
FALSE	High	Master Protein	P17563	Methanethiol oxidase OS=Mus musculus OX=10090 GN=Selenbp1 PE=1 SV=2	0	291.804	81	33	249	7	7	472	52.5	6.29	908.08	33	30	32541.9	36464.4	39671	11041.7	21300.9	8682.6	6259.5	5090.6	8135.6	14781.4	28650.1	28971.3	26582	18609.5	6753.1	4437.2	25107	4406.3	4816.8	4339.6	20634.3	12160	7812.3	2542	3219.1	3410.8	890.4	930.6	1482.2	4722	13814.8	28971.3
FALSE	High	Master Protein	O08710	Thyroglobulin OS=Mus musculus OX=10090 GN=Tg PE=1 SV=3	0	289.281	28	63	115	63	63	2766	304.3	5.49	367.01	63	0	15739.1	5804.6	4946	2595.4	3974.9	2639	2771.9	3010.3	3849.4	9565	4112.7	2838.5	2896.4	5934.3	1629.6	4233.6	1761.5	1548.9	1149.7	995.4	9979.9	1935.7	974	597.5	600.7	1036.7	394.3	550.3	701.3	3055.6	1983.1	2838.5
FALSE	High	Master Protein	P21614	Vitamin D-binding protein OS=Mus musculus OX=10090 GN=Gc PE=1 SV=2	0	281.951	71	28	242	28	28	476	53.6	5.5	919.28	28	0	10807.7	14081.1	20068.8	13052.8	18457.6	47541.3	28731.8	29413.3	31793.3	29444.2	26230.7	12543.9	26273.3	17406.2	18987.8	42387.8	22228.4	33832.1	36830.3	54630.7	6853	4695.7	3952.1	3005	2789.4	18675.7	4087	5377	5792.3	9406.1	12648.2	12543.9
FALSE	High	Master Protein	P52480	Pyruvate kinase PKM OS=Mus musculus OX=10090 GN=Pkm PE=1 SV=4	0	268.964	73	36	155	35	35	531	57.8	7.47	517.24	36	1	21859.6	21468.7	16970.2	27213.7	12563.1	10787.6	17712.9	14311.7	16152.7	16920.7	19818.1	20605.8	16770.1	16021.6	18507.6	6699.3	15360.7	9393.1	15396.6	20077.9	13860.8	7159.3	3341.9	6265.1	1898.6	4237.7	2519.6	2616.3	2942.8	5405.4	9556.1	20605.8
FALSE	High	Master Protein	Q9DBD0	Inhibitor of carbonic anhydrase OS=Mus musculus OX=10090 GN=Ica PE=1 SV=1	0	265.201	56	35	189	34	34	700	76.7	7.25	604.78	35	0	10425.9	13628	15244.2	14693.8	17868.7	30510	25785.5	24438.1	30338.2	20051.7	19415.8	10078.7	14090.8	12731.6	28755.5	33600.2	17462.2	29135.6	28984.5	27410.1	6610.9	4544.6	3002	3382.8	2700.4	11985.3	3667.9	4467.5	5527.2	6405.6	9362.1	10078.7
FALSE	High	Master Protein	Q80YX1	Tenascin OS=Mus musculus OX=10090 GN=Tnc PE=1 SV=1	0	262.454	32	58	138	58	58	2110	231.7	4.89	420.23	58	0	2518.6	2525.5	3060	5812.7	4423.5	24929	14604.2	22389.5	14722.9	9806.7	13469.8	1679.9	2908.2	15771.8	15268	22354.1	1903.2	24790.5	22241.6	22358	1597	842.2	602.6	1338.2	668.5	9792.9	2077.4	4093	2682.3	3132.8	6495	1679.9
FALSE	High	Master Protein	P08071	Lactotransferrin OS=Mus musculus OX=10090 GN=Ltf PE=1 SV=4	0	261.833	68	45	139	44	44	707	77.8	8.53	457.67	45	0	11466.6	9595	11310.3	14710.3	13635.1	13352	33051	18458.7	19303.3	9999.5	12127.2	5328.2	6732.3	17776	8784.8	12613.2	11625.2	7906.3	9346.3	10524.1	7270.8	3199.7	2227.3	3386.6	2060.6	5245.1	4701.4	3374.4	3516.8	3194.4	5847.6	5328.2
FALSE	High	Master Protein	Q6URW6	Myosin-14 OS=Mus musculus OX=10090 GN=Myh14 PE=1 SV=1	0	260.646	34	66	122	57	57	2000	228.4	5.55	361.59	66	3	12290	10428.3	9451.2	22758.3	10259.1	8058.9	9533.4	7628.2	8484.2	7440.8	9377.8	6930.4	6407.4	7366.3	16488.5	5790.5	6107	9027	5998.6	4368.4	7792.9	3477.6	1861.2	5239.4	1550.4	3165.8	1356.1	1394.5	1545.7	2377	4521.9	6930.4
FALSE	High	Master Protein	P63017	Heat shock cognate 71 kDa protein OS=Mus musculus OX=10090 GN=Hspa8 PE=1 SV=1	0	260.614	58	35	163	23	23	646	70.8	5.52	528.42	35	12	37501	30215.1	24893.4	19119.2	26075.8	15712.3	12276.6	11769.7	12399.4	17971.2	25446.2	27998.1	21156.9	21283.2	11854.1	7848.9	20309.4	7986.4	10541.4	17165.9	23778.8	10076	4902.2	4401.6	3940.7	6172.3	1746.3	2151.6	2259	5741	12269.9	27998.1
FALSE	High	Master Protein	P57780	Alpha-actinin-4 OS=Mus musculus OX=10090 GN=Actn4 PE=1 SV=1	0	246.763	58	47	116	31	31	912	104.9	5.41	404.2	47	16	12122.5	11493.8	9075.4	10818.8	12553.2	8936.4	8102.1	7973.9	7809.6	9855.5	10623.8	10438.2	9236.8	10866.9	10391.5	6395.7	10515.9	7100.8	8191	11387.8	7686.7	3832.9	1787.2	2490.7	1897.1	3510.5	1152.5	1457.7	1422.8	3148.4	5122.7	10438.2
FALSE	High	Master Protein	Q00897	Alpha-1-antitrypsin 1-4 OS=Mus musculus OX=10090 GN=Serpina1d PE=1 SV=1	0	244.187	59	25	451	9	9	413	46	5.44	1424.03	25	18	31775.1	39676.9	38108	21807.1	44442	67967.1	43395.7	41501.3	52961.3	43553.2	39889	35706.3	45252.4	39776.8	38992.6	53228	45599.7	38354.7	54515.7	51889.2	20148.1	13231.3	7504.5	5020.4	6716.3	26699.6	6172.9	7586.8	9648.8	13913.3	19234.1	35706.3
FALSE	High	Master Protein	G3X982	Aldehyde oxidase 3 OS=Mus musculus OX=10090 GN=Aox3 PE=1 SV=1	0	241.287	41	45	121	40	41	1335	146.8	6.46	382.53	45	4	17135.7	18065.5	14087.4	3970.1	6852.6	3021.9	2807.8	2452.3	3409.2	6374.3	10871.6	11297.2	8809.7	6576.8	3755.8	2975.2	8435.1	2728.2	3775.4	2421.9	10865.5	6024.4	2774.2	914	1035.6	1187.1	399.4	448.3	621.1	2036.3	5242.2	11297.2
FALSE	High	Master Protein	A6X935	Inter alpha-trypsin inhibitor, heavy chain 4 OS=Mus musculus OX=10090 GN=Itih4 PE=1 SV=2	0	235.14	45	34	131	34	34	942	104.6	6.4	445.96	34	0	4448.8	5978.8	5869.7	9048.8	7310.5	16747.1	38639.2	47669.5	33313.2	13134.6	15494.7	2968.5	5235.7	4377.5	11743.3	17136.6	5133	30407	21061.8	30513.8	2820.9	1993.8	1155.9	2083.2	1104.8	6578.8	5496.3	8714.4	6069.2	4195.9	7471.4	2968.5
FALSE	High	Master Protein	P11499	Heat shock protein HSP 90-beta OS=Mus musculus OX=10090 GN=Hsp90ab1 PE=1 SV=3	0	234.803	50	37	151	22	22	724	83.2	5.03	456.52	37	17	28088.4	23618.8	20269.9	20024.4	21557	11653.1	7717.6	6688.4	7547.2	12587.7	18619	16699.6	13684	13211.6	15024.9	4965	14359.4	5506.3	6414.4	8386.5	17810.4	7876.3	3991.7	4610	3257.8	4577.7	1097.8	1222.7	1375	4021.2	8977.9	16699.6
FALSE	High	Master Protein	Q64727	Vinculin OS=Mus musculus OX=10090 GN=Vcl PE=1 SV=4	0	233.006	48	54	125	54	54	1066	116.6	6	348.84	54	0	6723.4	7238.6	7943	11162	8471.8	8248.1	10225.9	9573.4	9112.7	13199.4	10132.1	9958.9	12387.7	10382	16926.6	8164.3	10583.8	10675.8	17068.4	23564.9	4263.2	2413.9	1564.2	2569.7	1280.3	3240.1	1454.6	1750.1	1660.2	4216.6	4885.6	9958.9
FALSE	High	Master Protein	P24549	Retinal dehydrogenase 1 OS=Mus musculus OX=10090 GN=Aldh1a1 PE=1 SV=5	0	231.957	57	28	258	16	16	501	54.4	7.8	862.91	28	15	34574.3	31128.5	25269.7	8908.9	15321.1	9683	5122.8	5729.5	7462.2	7995.2	23038.4	15353.6	11759.8	8941.1	6990.1	3792.7	10149.4	4321.8	4205.9	3311.1	21923	10380.6	4976.3	2051	2315.4	3803.8	728.7	1047.4	1359.5	2554.1	11108.9	15353.6
FALSE	High	Master Protein	Q63836	Selenium-binding protein 2 OS=Mus musculus OX=10090 GN=Selenbp2 PE=1 SV=2	0	231.67	67	28	179	2	2	472	52.6	6.18	637.47	28	0										177.2		240	223.2	175.5	159.5	169.3	192.8	107.7	205.5	147.1										56.6		240
FALSE	High	Master Protein	P16546	Spectrin alpha chain, non-erythrocytic 1 OS=Mus musculus OX=10090 GN=Sptan1 PE=1 SV=4	0	228.489	26	63	102	62	63	2472	284.4	5.33	288.72	63	0	8092.8	7620.3	7534.2	6060.3	8887.3	8853.4	8166.1	6590	8269	6684.5	8030	5023.2	4861	6120.5	6428.1	4011.7	6559.6	5133.3	7826.2	9879.2	5131.5	2541.2	1483.7	1395.2	1343.1	3477.9	1161.6	1204.7	1506.5	2135.4	3872	5023.2
FALSE	High	Master Protein	Q68FD5	Clathrin heavy chain 1 OS=Mus musculus OX=10090 GN=Cltc PE=1 SV=3	0	225.992	33	50	101	50	50	1675	191.4	5.69	325.6	50	0	10384.9	8750.3	8490.9	12125.8	8651.8	8214.5	7715.5	6932.4	6897.3	8028	9470.3	8377.4	5527.7	5120.4	10459.3	3943.8	7199	4313.2	6378.8	9785.6	6584.9	2918	1672.1	2791.6	1307.5	3226.9	1097.5	1267.3	1256.6	2564.6	4566.5	8377.4
FALSE	High	Master Protein	Q61233	Plastin-2 OS=Mus musculus OX=10090 GN=Lcp1 PE=1 SV=4	0	225.026	60	34	122	29	29	627	70.1	5.33	392.22	34	6	16773.2	15979	13453.2	10667.2	18693.1	11163.3	7302.1	6940.6	6643.2	13684.9	15912.8	20253.1	14841.1	12638.5	7272.1	7818.3	18512.2	5187.6	6587.1	11102.4	10635.6	5328.6	2649.3	2455.8	2825	4385.3	1038.7	1268.8	1210.3	4371.7	7673	20253.1
FALSE	High	Master Protein	P06728	Apolipoprotein A-IV OS=Mus musculus OX=10090 GN=Apoa4 PE=1 SV=3	0	224.509	77	29	183	29	29	395	45	5.47	542.42	29	0	9791	11025.4	10737.5	18276.9	12188.6	37846.5	37067.3	43825.1	38715.9	17058.7	19430.9	6295.1	9298.5	8241.4	23116.2	40761.5	13607.8	41710	32346.9	19458.8	6208.3	3676.7	2114.5	4207.7	1842	14867.3	5272.7	8011.6	7053.5	5449.5	9369.4	6295.1
FALSE	High	Master Protein	P58252	Elongation factor 2 OS=Mus musculus OX=10090 GN=Eef2 PE=1 SV=2	0	223.966	52	43	121	42	42	858	95.3	6.83	373.53	43	1	22794.6	20749.6	15268.6	22807.4	13260.5	9662.7	10776.3	8364.5	7422.6	12226.4	17204.4	18107.8	14709	10896.3	15522.9	6107.3	14149.7	9768.7	8599.2	8465.6	14453.7	6919.5	3006.8	5250.7	2004	3795.8	1532.9	1529.1	1352.3	3905.8	8295.8	18107.8
FALSE	High	Master Protein	P07759	Serine protease inhibitor A3K OS=Mus musculus OX=10090 GN=Serpina3k PE=1 SV=2	0	221.066	42	17	661	10	10	418	46.9	5.16	3500.27	17	0	20265.6	25093.6	24831.5	15499.2	33027.6	47242.4	45623.5	43289	50978.7	26673.9	32666.6	16416	23079.7	20934.6	24032.2	33941.8	24673.6	20889	39317.6	38607.9	12850.1	8368.1	4890	3568.2	4991.3	18558.3	6489.8	7913.6	9287.6	8521.1	15751.5	16416
FALSE	High	Master Protein	P26041	Moesin OS=Mus musculus OX=10090 GN=Msn PE=1 SV=3	0	220.275	63	49	132	36	36	577	67.7	6.6	353.58	49	13	20306	20640.8	15002.5	25643.4	18154.5	16245.1	17901.3	13024.6	13418.2	15751.2	20040.6	17343.1	16353.6	15611.8	19333.8	9954.8	20353.7	10558.6	11328.4	16276.6	12875.7	6883.2	2954.4	5903.6	2743.6	6381.6	2546.4	2381	2444.6	5031.8	9663.4	17343.1
FALSE	High	Master Protein	P07901	Heat shock protein HSP 90-alpha OS=Mus musculus OX=10090 GN=Hsp90aa1 PE=1 SV=4	0	219.98	45	34	158	20	20	733	84.7	5.01	487	34	0	9987	7707.9	7622.1	7723.1	9176.5	5167.6	3025	2680.4	3422.9	6150.2	6592.2	6859.1	6702.4	13709.6	6514.6	2828.5	6088.4	3172.7	3748.9	5006.9	6332.6	2570.4	1501	1778	1386.8	2030	430.3	490	623.6	1964.7	3178.7	6859.1
FALSE	High	Master Protein	P13020	Gelsolin OS=Mus musculus OX=10090 GN=Gsn PE=1 SV=3	0	218.74	40	34	192	34	34	780	85.9	6.18	621.35	34	0	14835.6	16919.1	17225.6	31082.1	17770.1	26296.5	24728.1	19770.4	28591.1	23098.4	17443.5	12976.4	20732.9	17127.8	34287.6	54715.6	19759.7	47190.4	26794.2	16118.6	9407	5642.1	3392.2	7155.7	2685.5	10330.1	3517.5	3614.2	5208.9	7378.9	8411.1	12976.4
FALSE	High	Master Protein	Q7TPR4	Alpha-actinin-1 OS=Mus musculus OX=10090 GN=Actn1 PE=1 SV=1	0	218.346	52	40	92	20	24	892	103	5.38	321.85	40	0	3261.7	3751.4	6861.9	4242.5	6648.8	2432.3	2373.3	2444.1	2418.4	5479.3	3457.3	4991.4	6675.5	6172.7	5549	6023.4	6081.1	7709.9	6017.5	5557.1	2068.2	1251	1351.3	976.7	1004.8	955.5	337.6	446.8	440.6	1750.4	1667.1	4991.4
FALSE	High	Master Protein	Q01853	Transitional endoplasmic reticulum ATPase OS=Mus musculus OX=10090 GN=Vcp PE=1 SV=4	0	215.387	54	38	100	37	38	806	89.3	5.26	327.6	38	0	16453.5	14336	14200.2	9737.3	11231.1	6616.8	6120.3	5555	6549.9	11259.8	10510.2	16093.5	13427.7	15004.4	12106.1	7381.8	12720.8	7421.3	6582.2	6266.8	10432.9	4780.7	2796.4	2241.7	1697.3	2599.3	870.6	1015.5	1193.3	3597	5067.9	16093.5
FALSE	High	Master Protein	P04186	Complement factor B OS=Mus musculus OX=10090 GN=Cfb PE=1 SV=2	0	214.996	43	34	146	34	34	761	85	7.37	454.06	34	0	10423.7	13070.5	14073.2	20417.5	14763.3	32689.1	26796.4	27039.8	25459.1	25066.4	19525.7	10104.2	15074.5	11915.2	32014.2	40399.5	17096.2	31953.3	25917.7	39187.1	6609.5	4358.7	2771.4	4700.5	2231.1	12841.3	3811.7	4943.1	4638.3	8007.6	9415.1	10104.2
FALSE	High	Master Protein	Q61316	Heat shock 70 kDa protein 4 OS=Mus musculus OX=10090 GN=Hspa4 PE=1 SV=1	0	213.979	55	43	104	40	40	841	94.1	5.24	332.25	43	3	12296.5	11816.7	9614.7	9762	11094.1	7237.7	6834.6	6033.1	6671.8	12745.1	10392.2	15472	12562.9	12555.2	10286.2	6930.7	13053.1	7728	8973.1	13101.5	7797	3940.6	1893.4	2247.4	1676.6	2843.2	972.2	1102.9	1215.5	4071.5	5011	15472
FALSE	High	Master Protein	P07758	Alpha-1-antitrypsin 1-1 OS=Mus musculus OX=10090 GN=Serpina1a PE=1 SV=4	0	211.253	51	22	523	1	2	413	46	5.72	1675.45	22	0	141.6	150.8	246.3	122.1	155.5	247.2	253.8	256	285.4	688.4	166.1	779.3	1059.4	992.7	794.5	1102.2	899.1	802.9	897.4	744	89.8	50.3	48.5	28.1	23.5	97.1	36.1	46.8	52	219.9	80.1	779.3
FALSE	High	Master Protein	Q00896	Alpha-1-antitrypsin 1-3 OS=Mus musculus OX=10090 GN=Serpina1c PE=1 SV=2	0	206.794	50	22	477	1	1	412	45.8	5.44	1579.9	22	10	11494.7	15029	15947.5	10619.5	19284	26215.3	17703.7	16751.4	19741.4	19030.9	16693.2	13759.8	19599.1	16946.6	26278.6	25622.7	19381.8	17218.4	22636.4	22648	7288.6	5011.8	3140.5	2444.8	2914.3	10298.2	2518.3	3062.3	3596.6	6079.5	8049.3	13759.8
FALSE	High	Master Protein	P60710	Actin, cytoplasmic 1 OS=Mus musculus OX=10090 GN=Actb PE=1 SV=1	0	205.533	62	20	263	0	7	375	41.7	5.48	989.12	20	18	26171	25768.3	19039	54184.5	24915.8	18693.8	22176.9	18967.4	18026.6	16394.8	26775.7	17644.2	17198.5	16015.1	15654.7	10630.7	16372.8	10874.8	15937.6	18781.7	16594.6	8593.1	3749.3	12474.3	3765.4	7343.5	3154.6	3467.4	3284.2	5237.4	12911	17644.2
FALSE	High	Master Protein	O08677	Kininogen-1 OS=Mus musculus OX=10090 GN=Kng1 PE=1 SV=1	0	204.885	40	23	198	23	23	661	73.1	6.54	646.69	23	0	6577.5	9551.2	12100.4	11813.1	12860.9	21232.5	32116	39003.1	32863.1	20293.3	18028.2	8216.8	14917.7	13110.4	15857.2	27287	14588.8	34055.2	36362	37403.3	4170.7	3185.1	2382.9	2719.6	1943.6	8340.8	4568.4	7130.1	5987.2	6482.8	8693	8216.8
FALSE	High	Master Protein	P22599	Alpha-1-antitrypsin 1-2 OS=Mus musculus OX=10090 GN=Serpina1b PE=1 SV=2	0	202.081	48	20	457	6	6	413	45.9	5.54	1476.8	20	0	3976.4	5350.9	5034.9	4681.2	5899.1	8847.1	10445.9	8038.5	8718	4582.5	6786.3	2798.6	3454.2	2867.2	5164.6	6997.8	4262.9	5491.7	6056.6	6347.8	2521.4	1784.4	991.5	1077.7	891.5	3475.4	1485.9	1469.5	1588.3	1463.9	3272.3	2798.6
FALSE	High	Master Protein	Q00898	Alpha-1-antitrypsin 1-5 OS=Mus musculus OX=10090 GN=Serpina1e PE=1 SV=1	0	193.706	43	18	469	6	6	413	45.9	5.73	1516.15	18	0	9327	9951.5	11862.2	1758.3	10593.2	18964.4	4008.5	3685.3	4893.9	5407.6	7822.4	5511.1	7555.7	6247.8	3310.1	2177.4	4867.3	1889.1	4093.4	3135	5914.1	3318.6	2336	404.8	1600.9	7449.8	570.2	673.7	891.6	1727.5	3771.9	5511.1
FALSE	High	Master Protein	Q8K0E8	Fibrinogen beta chain OS=Mus musculus OX=10090 GN=Fgb PE=1 SV=1	0	189.934	63	28	123	28	28	481	54.7	7.08	421.98	28	0	5570.2	7122.6	7045.7	11887.4	10229.3	19884.1	43986.9	42056.6	34540	10986.8	15638.8	4199.3	5779.5	6681.3	14674.7	18333.7	4707.4	26793.3	15637.7	13862.9	3532	2375.2	1387.5	2736.7	1545.9	7811.1	6257	7688.3	6292.7	3509.8	7540.9	4199.3
FALSE	High	Master Protein	O35945	Aldehyde dehydrogenase, cytosolic 1 OS=Mus musculus OX=10090 GN=Aldh1a7 PE=1 SV=1	0	189.284	49	23	147	11	11	501	54.6	7.71	489.99	23	0	9130.8	8677.4	6161.7	2073.7	3041.9	1611.4	937.8	978.6	1527	2371.5	6289	4081.8	2728.6	2058.1	2055.1	1129.9	3090.3	1027.7	1564.8	949.6	5789.7	2893.7	1213.4	477.4	459.7	633	133.4	178.9	278.2	757.6	3032.5	4081.8
FALSE	High	Master Protein	P28666	Murinoglobulin-2 OS=Mus musculus OX=10090 GN=Mug2 PE=1 SV=2	0	188.898	18	23	159	1	1	1451	162.3	6.74	516.33	23	0	87.8	150.8	189.9	122.5	139	195.2	771.9	658.6	610.4	128.7	307.8	35	72.7	138.8	165.1	185.4	71.5	160.2	317.3	220.8	55.7	50.3	37.4	28.2	21	76.7	109.8	120.4	111.2	41.1	148.4	35
FALSE	High	Master Protein	P19221	Prothrombin OS=Mus musculus OX=10090 GN=F2 PE=1 SV=1	0	187.313	46	27	129	26	26	618	70.2	6.43	387.01	27	0	7681.5	11519.9	10616.6	18851.6	12168.7	19643	25232.2	24606.1	33493.2	12492.5	15196.7	6027	9586.9	8000.6	16878.9	27423.5	10684.1	32631.3	19914.3	13190.1	4870.7	3841.6	2090.7	4340	1839	7716.4	3589.2	4498.2	6102	3990.8	7327.7	6027
FALSE	High	Master Protein	Q61830	Macrophage mannose receptor 1 OS=Mus musculus OX=10090 GN=Mrc1 PE=1 SV=2	0	187.276	30	44	94	44	44	1456	164.9	6.83	293.73	44	0	12261.3	13745.2	11343.3	7386.9	14171.7	6524.7	4511.9	4662.8	5988.4	9406	8067.4	10581.9	12113.8	12766.7	4949.1	5947.5	12421.5	5638.1	9066	4519.8	7774.7	4583.7	2233.8	1700.6	2141.7	2563.1	641.8	852.4	1091	3004.8	3890	10581.9
FALSE	High	Master Protein	Q91WP6	Serine protease inhibitor A3N OS=Mus musculus OX=10090 GN=Serpina3n PE=1 SV=1	0	186.68	49	23	155	16	17	418	46.7	5.82	565.45	23	7	7279.8	8008.7	8700.2	10463.5	11626.1	18207.1	70312.3	60362.6	42429.7	21897.3	24982.9	5502.5	7926.9	6851.1	11018.5	15963.6	6934.6	34120.7	41412.9	59224.6	4616	2670.7	1713.3	2408.9	1757	7152.3	10001.7	11034.8	7730.1	6995.2	12046.5	5502.5
FALSE	High	Master Protein	Q03734	Serine protease inhibitor A3M OS=Mus musculus OX=10090 GN=Serpina3m PE=1 SV=2	0	184.612	51	20	196	11	11	418	47	6.1	784.5	20	6	9046.8	12615.6	12593.5	6585.9	15722.7	25932.5	38045.8	34479.2	37327.2	16229.8	18812.1	7109	10117.4	8130.4	9133.6	18344.6	10693.2	19923.3	24671.6	31715.4	5736.4	4207	2480	1516.2	2376.1	10187.1	5411.9	6303.1	6800.5	5184.7	9071	7109
FALSE	High	Master Protein	Q91X72	Hemopexin OS=Mus musculus OX=10090 GN=Hpx PE=1 SV=2	0	183.255	57	25	408	25	25	460	51.3	7.8	1316.91	25	0	22794.3	29076.2	50956.3	33448.6	54685.2	95469.2	61447.4	80451.9	79071.9	50817.2	61653.5	22615	46490.1	41354.9	44230.6	59068.9	36292.6	53264.4	70882.4	95942	14453.5	9696.2	10034.7	7700.5	8264.3	37503.3	8740.7	14707.3	14405.8	16233.8	29728.7	22615
FALSE	High	Master Protein	P32261	Antithrombin-III OS=Mus musculus OX=10090 GN=Serpinc1 PE=1 SV=1	0	181.98	61	30	161	30	30	465	52	6.46	569.97	30	0	14653.9	21845	22137.6	19629.1	24429.4	35408.6	35220.5	33636.8	43290.4	24872.7	25761.4	16538	21486.3	19074.1	27268.5	39462.2	22589.2	35036.4	35698.1	30955.2	9291.8	7284.8	4359.5	4519	3691.9	13909.6	5010	6149.1	7886.9	7945.7	12421.9	16538
FALSE	High	Master Protein	O88844	Isocitrate dehydrogenase [NADP] cytoplasmic OS=Mus musculus OX=10090 GN=Idh1 PE=1 SV=2	0	179.906	67	28	101	27	27	414	46.6	7.17	329.22	28	1	29821.1	31679	27393.3	11249.7	17308.2	7796.7	4370.6	3700	5932.4	14449.3	21906.7	28109.4	21149.4	15557.9	9121	5121.2	21963	3767.1	4776.2	4183.6	18909.1	10564.2	5394.5	2589.9	2615.7	3062.8	621.7	676.4	1080.8	4615.9	10563.2	28109.4
FALSE	High	Master Protein	O08638	Myosin-11 OS=Mus musculus OX=10090 GN=Myh11 PE=1 SV=1	0	179.761	18	40	84	20	20	1972	226.9	5.45	251.22	40	4	2550	1879.9	2842.2	4105.7	5903.7	2659.4	6422.6	4246	4018.4	709	1133	648.9	1334.1	2719.4	3135.3	4557	2318.7	5808.7	4168.9	1423.6	1616.9	626.9	559.7	945.2	892.2	1044.7	913.6	776.2	732.1	226.5	546.3	648.9
FALSE	High	Master Protein	Q99K51	Plastin-3 OS=Mus musculus OX=10090 GN=Pls3 PE=1 SV=3	0	175.79	52	30	100	22	22	630	70.7	5.62	312.26	30	3	11134.5	10748.3	6781.2	21304.5	8199.8	5882.7	5172.7	3956.6	4711.1	11128.3	8945.2	13911.6	14019	9705.2	16168.2	4105.1	11464.5	5583.8	5543.6	5544.9	7060.2	3584.3	1335.4	4904.7	1239.2	2310.9	735.8	723.3	858.3	3555	4313.3	13911.6
FALSE	High	Master Protein	D3YXG0	Hemicentin-1 OS=Mus musculus OX=10090 GN=Hmcn1 PE=1 SV=1	0	175.266	10	53	78	53	53	5634	611.2	6.64	212.43	53	0	1382.6	1567.1	2144.4	3706.9	3306.5	7538.4	8068.4	13249.9	6736	3792.7	4108.8	1370.1	1725.1	2031.2	5633.2	8348.9	1747.7	14983.9	8362.3	4485.8	876.7	522.6	422.3	853.4	499.7	2961.3	1147.7	2422.2	1227.2	1211.6	1981.2	1370.1
FALSE	High	Master Protein	E9Q414	Apolipoprotein B-100 OS=Mus musculus OX=10090 GN=Apob PE=1 SV=1	0	172.902	12	60	90	59	60	4505	509.1	6.81	223.51	60	0	2125.6	2517.4	2583.2	2803.9	3047.8	9795.3	31550.8	24645.5	12860.5	7757.6	8105.9	1852.5	2247.8	3019.8	5243.7	5246.7	2503.5	9861.7	9798.5	20744.1	1347.8	839.5	508.7	645.5	460.6	3847.9	4488	4505.4	2343	2478.2	3908.6	1852.5
FALSE	High	Master Protein	Q8K182	Complement component C8 alpha chain OS=Mus musculus OX=10090 GN=C8a PE=1 SV=1	0	172.723	58	30	109	30	30	587	66	6.54	353.05	30	0	6968.8	8631.5	8950.5	9374.6	10865.2	26818.6	8181.6	9119.9	9036.9	8318.9	11518.1	4098.2	6105.3	5665.7	13982.6	16422.7	7047.1	7441.1	5821.1	7837.5	4418.8	2878.4	1762.6	2158.2	1642	10535.2	1163.8	1667.2	1646.4	2657.5	5553.9	4098.2
FALSE	High	Master Protein	Q9QUR6	Prolyl endopeptidase OS=Mus musculus OX=10090 GN=Prep PE=1 SV=1	0	172.59	55	33	91	33	33	710	80.7	5.73	274.63	33	0	8248.9	8909.5	6453.6	20752.4	6093.6	5189.5	4369.9	3550.7	4032.1	7132.1	7107.6	9268	11019.2	6289.4	10162.8	2881.8	6425.1	3658.5	3879.6	4175.2	5230.5	2971.1	1270.9	4777.6	920.9	2038.6	621.6	649.1	734.6	2278.4	3427.2	9268
FALSE	High	Master Protein	Q8BH35	Complement component C8 beta chain OS=Mus musculus OX=10090 GN=C8b PE=1 SV=1	0	171.961	54	26	104	26	26	589	66.2	7.77	313.52	26	0	8653.7	10900.6	10820.2	12529.8	13715.1	35515.2	12431.2	12820	12582.2	13550.6	15806.2	6767.4	9351.3	8560.6	25046.5	26487.7	12117.7	11395.1	11341.6	13373.1	5487.2	3635.1	2130.8	2884.6	2072.7	13951.5	1768.3	2343.6	2292.3	4328.8	7621.6	6767.4
FALSE	High	Master Protein	P26040	Ezrin OS=Mus musculus OX=10090 GN=Ezr PE=1 SV=3	0	170.73	60	46	118	34	35	586	69.4	6.1	324.09	46	2	17257.7	14092.5	13116.5	10652.5	12365.9	6837.8	10005.1	6867.3	7917.7	11441	12564.1	17048.4	12916.9	16143.2	9749.9	6132.1	16022.4	7124.1	7920.6	7580.2	10942.8	4699.5	2583	2452.4	1868.8	2686.1	1423.2	1255.4	1442.5	3654.9	6058.3	17048.4
FALSE	High	Master Protein	O89020	Afamin OS=Mus musculus OX=10090 GN=Afm PE=1 SV=2	0	169.747	47	30	99	30	30	608	69.3	5.78	305.82	30	0	4312.7	7537	9451.7	10142.5	12940.3	27335.1	10083.2	14652.5	13386.3	14060.5	10844.5	5461.4	10781.9	8986.8	12049.1	32709.6	12891.1	22226.8	14811.6	18449.6	2734.6	2513.4	1861.3	2335	1955.6	10738.1	1434.3	2678.6	2438.8	4491.7	5229.1	5461.4
FALSE	High	Master Protein	P20152	Vimentin OS=Mus musculus OX=10090 GN=Vim PE=1 SV=3	0	169.58	65	31	89	25	27	466	53.7	5.12	272.88	31	2	8743.3	4428.8	4460	15346.7	5365.1	6989.3	11468.8	12459.5	7962.7	6559.6	11416.9	10765	3881.8	3948.9	3039.9	2897.8	3876.5	3106.3	6684.9	9122.1	5544	1476.9	878.3	3533.1	810.8	2745.6	1631.4	2277.7	1450.7	2095.5	5505.1	10765
FALSE	High	Master Protein	Q91V92	ATP-citrate synthase OS=Mus musculus OX=10090 GN=Acly PE=1 SV=1	0	167.715	39	38	87	38	38	1091	119.7	7.44	252.98	38	0	12658.4	13346.4	8768.7	10762.4	7185.4	7054.2	5629.7	4784.2	5852.3	7095.5	9669	10311.3	5938.5	6361.3	8583.7	3627.8	7578.7	4110.8	5404.5	5246.3	8026.5	4450.7	1726.8	2477.7	1085.9	2771.1	800.8	874.6	1066.2	2266.7	4662.3	10311.3
FALSE	High	Master Protein	P14824	Annexin A6 OS=Mus musculus OX=10090 GN=Anxa6 PE=1 SV=3	0	166.659	60	42	106	40	40	673	75.8	5.5	293.57	42	2	20604.7	21785.4	12370	21672.8	10051.3	5623.5	8492.3	5301.7	6551.5	10264.7	14117	17334.6	15075.3	10159.9	5368	3597.8	12457.7	4761.2	5767.3	3726.9	13065.1	7264.9	2436	4989.5	1519	2209.1	1208	969.2	1193.6	3279.1	6807.1	17334.6
FALSE	High	Master Protein	Q8CI94	Glycogen phosphorylase, brain form OS=Mus musculus OX=10090 GN=Pygb PE=1 SV=3	0	165.526	50	38	78	29	29	843	96.7	6.73	244.13	38	10	9871.9	11251.2	7930.8	7190.1	6724.2	3777.7	3759	2706.1	3067.2	8685.1	6769.3	14046.9	9587.8	8254.5	9695.7	3498.6	10573.7	4073.7	4350.6	4077.1	6259.6	3752	1561.8	1655.3	1016.2	1484	534.7	494.7	558.8	2774.5	3264.1	14046.9
FALSE	High	Master Protein	Q61598	Rab GDP dissociation inhibitor beta OS=Mus musculus OX=10090 GN=Gdi2 PE=1 SV=1	0	165.144	73	29	83	23	23	445	50.5	6.25	260.93	29	7	11268.2	10308.7	7631.2	12587.1	7434.2	4833.4	3582.5	3208.8	3750.6	8275.3	8514.5	13108.6	10419.9	8630	8675.4	3351.8	9969.2	3214.9	3549.7	4265.7	7145	3437.7	1502.8	2897.8	1123.5	1898.7	509.6	586.6	683.3	2643.6	4105.6	13108.6
FALSE	High	Master Protein	P48036	Annexin A5 OS=Mus musculus OX=10090 GN=Anxa5 PE=1 SV=1	0	165.013	82	25	138	24	24	319	35.7	4.96	460.74	25	0	27980.2	25565	17070.3	92769.9	11363.4	8473.9	19400.1	9108.4	12026.7	20112.7	19996.9	20448.8	37915.5	17353.9	19309	5825.6	13252.4	11078.1	12552.1	7744.6	17741.8	8525.3	3361.6	21357.4	1717.3	3328.8	2759.6	1665.1	2191.1	6425.1	9642.3	20448.8
FALSE	High	Master Protein	P21981	Protein-glutamine gamma-glutamyltransferase 2 OS=Mus musculus OX=10090 GN=Tgm2 PE=1 SV=4	0	163.789	41	28	91	27	28	686	77	5.1	280.33	28	0	11395.5	10031	5588.9	15916.6	8088	5162.8	5353.4	4813.2	4912.6	9547.8	7378	10620.4	14793.1	12095.6	14829	4810.2	7390.3	6414.3	7360.7	3728.9	7225.7	3345.1	1100.6	3664.3	1222.3	2028.1	761.5	879.9	895	3050.1	3557.6	10620.4
FALSE	High	Master Protein	P20029	Endoplasmic reticulum chaperone BiP OS=Mus musculus OX=10090 GN=Hspa5 PE=1 SV=3	0	160.233	49	31	83	28	28	655	72.4	5.16	253.6	31	0	7083.9	5394.7	4886.1	5218.9	5051.4	4494	4200.4	3913.9	4615.1	6222.2	5524.8	7994.8	6018.6	6917.2	3422.8	4209.5	7808.9	4134.9	4840.5	6345.9	4491.8	1799	962.2	1201.5	763.4	1765.4	597.5	715.5	840.8	1987.7	2664	7994.8
FALSE	High	Master Protein	P23953	Carboxylesterase 1C OS=Mus musculus OX=10090 GN=Ces1c PE=1 SV=4	0	159.912	33	19	142	16	16	554	61	5.06	470.17	19	0	8684.5	15882.1	16162.8	15923.5	13664.8	27361.4	34703.1	34843	37360.7	18406	21215.1	7957.5	13532.1	11353.5	16291.1	31787.7	15985.6	32720.9	34193.3	28688.8	5506.7	5296.3	3182.9	3665.9	2065.1	10748.4	4936.4	6369.6	6806.6	5879.9	10229.7	7957.5
FALSE	High	Master Protein	Q60847	Collagen alpha-1(XII) chain OS=Mus musculus OX=10090 GN=Col12a1 PE=2 SV=3	0	159.25	14	46	80	46	46	3120	340	5.64	208.19	46	0	3679.8	3582.6	4276.2	8715.2	5258.6	12149.5	10713.1	13496.6	9213.7	4711.8	6692.4	2059.9	2325.7	2731.6	5644.4	10587.6	2494.7	9569.7	8822.1	6406.9	2333.3	1194.7	842.1	2006.4	794.7	4772.7	1523.9	2467.3	1678.6	1505.2	3227	2059.9
FALSE	High	Master Protein	Q62261	Spectrin beta chain, non-erythrocytic 1 OS=Mus musculus OX=10090 GN=Sptbn1 PE=1 SV=2	0	158.249	19	49	73	44	48	2363	274.1	5.58	188.83	49	1	5542	5170.1	4959.7	4748.1	5534.5	6157.1	5797	5778.2	5437.8	6360.5	5462.2	4365.2	4129.2	5661.6	7436.7	4343.1	5366.8	5518.4	7442.5	9335.2	3514.1	1724.1	976.7	1093.1	836.4	2418.7	824.6	1056.3	990.7	2031.9	2633.8	4365.2
FALSE	High	Master Protein	Q61646	Haptoglobin OS=Mus musculus OX=10090 GN=Hp PE=1 SV=1	0	157.998	47	18	188	18	18	347	38.7	6.29	557.9	18	0	22220.9	26492.5	32016.9	10035.2	40309.7	17226	12175.3	28622.8	16481	20882.8	24425.8	20693.9	45476.1	37910.6	7567.2	10109.5	28357.3	12218.6	11952.5	23106.5	14089.9	8834.6	6305	2310.3	6091.8	6766.9	1731.9	5232.5	3002.6	6671.1	11777.9	20693.9
FALSE	High	Master Protein	P10107	Annexin A1 OS=Mus musculus OX=10090 GN=Anxa1 PE=1 SV=2	0	157.691	66	24	87	22	23	346	38.7	7.37	313.67	24	1	30004.5	22712	17348.5	69129.4	18272.3	9425.9	21234.2	10303.7	10003	11248.8	18466.2	11902.2	14191.6	16509	7617.7	5263.5	11978.5	7596.2	7686.4	4631.6	19025.4	7573.9	3416.4	15914.9	2761.4	3702.8	3020.5	1883.6	1822.4	3593.5	8904.2	11902.2
FALSE	High	Master Protein	Q61362	Chitinase-3-like protein 1 OS=Mus musculus OX=10090 GN=Chi3l1 PE=1 SV=3	0	157.645	53	21	157	21	21	389	43.9	8.57	478.73	21	0	31030.8	26141.9	34947.4	18402.9	45041.5	13938.3	4287.6	4031.5	6172.8	10182.3	18167.5	11723.8	15139.2	14899.9	5141.7	8383.3	17468.7	3493.1	3625.2	2604.6	19676.1	8717.7	6882.1	4236.7	6806.9	5475.4	609.9	737	1124.6	3252.8	8760.2	11723.8
FALSE	High	Master Protein	Q91ZX7	Prolow-density lipoprotein receptor-related protein 1 OS=Mus musculus OX=10090 GN=Lrp1 PE=1 SV=1	0	156.645	10	46	74	43	46	4545	504.4	5.36	199.82	46	0	4196.9	4456.7	4331.5	3513.2	5374.4	4540.4	4104.1	3770.6	4499.8	5434.9	4090.7	5181.4	5578.3	6269	4915.9	5300	6431	5592.5	5472.3	5917.5	2661.2	1486.2	853	808.8	812.2	1783.6	583.8	689.3	819.8	1736.2	1972.5	5181.4
FALSE	High	Master Protein	E9PV24	Fibrinogen alpha chain OS=Mus musculus OX=10090 GN=Fga PE=1 SV=1	0	156.394	35	29	116	29	29	789	87.4	6.11	360.87	29	0	4971.4	6488.6	6508.5	10303.7	9081.9	15190.7	37877.1	31860.6	27482.3	11386	11925.2	4873.6	6221.6	7135.2	15918.5	21910.3	6101.9	30862.7	17136.2	15395.7	3152.3	2163.8	1281.7	2372.1	1372.5	5967.4	5387.9	5824.4	5006.9	3637.3	5750.2	4873.6
FALSE	High	Master Protein	P68369	Tubulin alpha-1A chain OS=Mus musculus OX=10090 GN=Tuba1a PE=1 SV=1	0	154.244	65	21	94	0	6	451	50.1	5.06	329.39	21	17	14702.8	10623.9	10733.9	22293.6	11593.7	5306.1	5120.7	3901.9	4170.5	13898.4	10207.4	13506.1	16235.1	15437.9	28206.5	5911.7	13539.1	9012.4	7884.9	9146.4	9322.8	3542.8	2113.8	5132.4	1752.1	2084.4	728.4	713.3	759.8	4439.9	4921.9	13506.1
FALSE	High	Master Protein	O35744	Chitinase-like protein 3 OS=Mus musculus OX=10090 GN=Chil3 PE=1 SV=2	0	154.041	55	19	103	12	12	398	44.4	5.69	355.64	19	8	25494.4	21185.6	35271.9	9557.4	34476.1	10631.3	5011.7	4197.3	6815.6	10518.9	15616.2	12491.5	19207.6	30309.2	3795.5	7832.9	19172.1	3648.2	4380	3554.8	16165.6	7064.9	6946	2200.3	5210.2	4176.3	712.9	767.3	1241.7	3360.3	7530	12491.5
FALSE	High	Master Protein	Q61129	Complement factor I OS=Mus musculus OX=10090 GN=Cfi PE=1 SV=3	0	153.14	53	27	104	27	27	603	67.2	7.46	311.98	27	0	3805.5	5355.1	6886.3	8384.6	6898.9	11927.5	14499.4	15096.1	15552.2	11705.9	9039.2	3891.8	7868.8	7194	10794.1	19334.4	7015.8	22509.4	17610.7	18985	2413	1785.8	1356.1	1930.3	1042.6	4685.5	2062.5	2759.7	2833.4	3739.5	4358.6	3891.8
FALSE	High	Master Protein	P06683	Complement component C9 OS=Mus musculus OX=10090 GN=C9 PE=1 SV=2	0	151.558	51	27	100	27	27	548	62	5.78	318.43	27	0	9504.3	9733.2	11302.6	6313.1	11749.9	26018.8	6314.4	6664.9	8411.2	9540.9	11770.5	8474.8	11782.7	8960.7	17040.2	16857	11180.2	8374	5737.9	4636.1	6026.5	3245.8	2225.8	1453.4	1775.7	10221	898.2	1218.4	1532.4	3047.9	5675.6	8474.8
FALSE	High	Master Protein	Q02053	Ubiquitin-like modifier-activating enzyme 1 OS=Mus musculus OX=10090 GN=Uba1 PE=1 SV=1	0	150.139	39	35	78	25	35	1058	117.7	5.66	267.23	35	0	15175.8	13461.2	10011.3	11564.2	7560.6	5270.7	5091.9	4646.4	4679.3	11119.9	10966.8	18535	12252.9	9842.4	10343.3	3559.1	12204.8	4176.3	5612.1	8054.9	9622.7	4489	1971.5	2662.3	1142.6	2070.5	724.3	849.4	852.5	3552.3	5288.1	18535
FALSE	High	Master Protein	P35441	Thrombospondin-1 OS=Mus musculus OX=10090 GN=Thbs1 PE=1 SV=1	0	148.762	32	35	85	34	35	1170	129.6	4.96	245.1	35	0	2016.1	2202.9	2018	3210	3324.4	7677.9	10055.1	10618.8	7884.8	7637.1	5171.4	1743.3	2581.5	4891.8	7701.4	8456.2	2610.8	14812.4	16109.5	15114.9	1278.4	734.6	397.4	739	502.4	3016.1	1430.3	1941.2	1436.5	2439.7	2493.6	1743.3
FALSE	High	Master Protein	P15626	Glutathione S-transferase Mu 2 OS=Mus musculus OX=10090 GN=Gstm2 PE=1 SV=2	0	147.951	82	21	107	11	11	218	25.7	7.39	347.02	21	11	15569.9	16470.8	11476.8	4797.6	5625.1	2794.8	2051.4	1839.6	2996.9	6114.8	11264.2	12896.4	8058.1	5322.8	3280.7	2925.6	7231.9	2487.8	2530	2078.9	9872.6	5492.6	2260.1	1104.5	850.1	1097.9	291.8	336.3	546	1953.4	5431.5	12896.4
FALSE	High	Master Protein	Q9Z1Q9	Valine--tRNA ligase OS=Mus musculus OX=10090 GN=Vars1 PE=1 SV=1	0	147.294	32	37	64	37	37	1263	140.1	7.77	184.84	37	0	7801	6729.4	6041.8	3390.7	4665.7	3263.5	2769.1	2819.3	3059.5	4787.2	4675.7	7602	4975.1	5203.7	3658	2378.1	5672.9	2696.3	2909.5	2717.7	4946.5	2244.1	1189.8	780.6	705.1	1282	393.9	515.4	557.4	1529.3	2254.6	7602
FALSE	High	Master Protein	P68372	Tubulin beta-4B chain OS=Mus musculus OX=10090 GN=Tubb4b PE=1 SV=1	0	147.148	53	19	148	1	2	445	49.8	4.89	401.97	19	24	14658.3	11249.1	13383.6	21085.1	12501.6	6246.4	5872.9	5082.9	5769.4	9562.2	10597.3	10085.4	10829.4	11207.4	19357.2	4738.7	9828.2	7287.8	6823.3	6125.4	9294.6	3751.3	2635.6	4854.2	1889.3	2453.8	835.4	929.2	1051.1	3054.7	5109.9	10085.4
FALSE	High	Master Protein	Q61702	Inter-alpha-trypsin inhibitor heavy chain H1 OS=Mus musculus OX=10090 GN=Itih1 PE=1 SV=2	0	146.264	29	23	75	23	23	907	101	6.96	260.24	23	0	3803.4	6176.2	4863.7	9346.3	7700.9	24743.2	19001.5	23265.9	22789.9	11706.2	12329.6	3471.2	4737.7	4029.7	19439.5	22133.7	8118.6	25040.3	17403.1	18480.4	2411.7	2059.6	957.8	2151.7	1163.8	9719.9	2702.9	4253.2	4152	3739.6	5945.2	3471.2
FALSE	High	Master Protein	O08553	Dihydropyrimidinase-related protein 2 OS=Mus musculus OX=10090 GN=Dpysl2 PE=1 SV=2	0	145.997	57	23	62	18	19	572	62.2	6.38	221	23	5	4609	4398.5	3081.3	15735.5	4161.5	3550.4	3401.1	3495.5	2973.9	5605.5	4688.8	4145.5	7315.3	4726.9	17791.7	3077.4	4188.5	4806	3799.2	3983.7	2922.5	1466.8	606.8	3622.6	628.9	1394.7	483.8	639	541.8	1790.7	2260.9	4145.5
FALSE	High	Master Protein	Q9WU78	Programmed cell death 6-interacting protein OS=Mus musculus OX=10090 GN=Pdcd6ip PE=1 SV=3	0	145.881	39	36	81	36	36	869	96	6.52	240.14	36	0	14350.9	13654.7	9642.1	14711.6	9503.4	6300.7	7529.2	5894.1	7074.1	9660.2	11132.5	14703.2	10661.7	8633.3	9937.4	3691.3	10544.1	4958.4	5605.1	5609.2	9099.7	4553.5	1898.8	3386.9	1436.2	2475.1	1071	1077.5	1288.8	3086	5368	14703.2
FALSE	High	Master Protein	Q61704	Inter-alpha-trypsin inhibitor heavy chain H3 OS=Mus musculus OX=10090 GN=Itih3 PE=1 SV=3	0	145.639	30	21	75	21	21	889	99.3	6.05	282.32	21	0	1755.1	2695.2	3044.8	3996.2	3895.5	8891.6	37476.4	39939.6	33184.8	9643.3	14272.8	1173.6	2048.3	2949.6	3304.1	5527	2293.3	12437.4	17266.2	28746.1	1112.9	898.8	599.6	920	588.7	3492.9	5330.9	7301.3	6045.8	3080.6	6882.2	1173.6
FALSE	High	Master Protein	Q9ET01	Glycogen phosphorylase, liver form OS=Mus musculus OX=10090 GN=Pygl PE=1 SV=4	0	145.623	40	37	75	30	30	850	97.4	7.09	234.82	37	1	6554.3	7335.5	5508.6	4605.6	7518.9	3909.6	5125.6	5560.5	3764.3	7498.1	6543.5	10124.6	7180.6	7836.5	4501.1	3333.6	9837.1	2623.1	5889.6	8519.8	4156	2446.2	1084.8	1060.3	1136.3	1535.8	729.1	1016.5	685.8	2395.3	3155.2	10124.6
FALSE	High	Master Protein	P26262	Plasma kallikrein OS=Mus musculus OX=10090 GN=Klkb1 PE=1 SV=2	0	145.184	45	28	74	27	28	638	71.3	8.02	218.15	28	0	2959.5	4712.2	4473.7	6714.9	6441	14851.2	12053	12628.5	14023	6680.4	8216.9	2399.9	3098	2927.6	10598.6	14615.4	6419.9	10109.8	9681.8	9535.1	1876.6	1571.4	881	1545.9	973.4	5834	1714.5	2308.6	2554.8	2134.1	3962.1	2399.9
FALSE	High	Master Protein	P10649	Glutathione S-transferase Mu 1 OS=Mus musculus OX=10090 GN=Gstm1 PE=1 SV=2	0	144.273	73	17	146	10	13	218	26	7.94	427.02	17	1	18190	16831.8	11606.3	4695.1	8797.4	5005.5	5109.4	4115.8	4842.3	9258.3	11861.9	16334.8	11146.5	10298.7	6158.7	5146	10717.8	5658.8	7100.1	4200.4	11534	5613	2285.6	1080.9	1329.5	1966.3	726.8	752.4	882.2	2957.6	5719.7	16334.8
FALSE	High	Master Protein	Q01279	Epidermal growth factor receptor OS=Mus musculus OX=10090 GN=Egfr PE=1 SV=1	0	143.886	26	27	66	27	27	1210	134.8	6.86	239.49	27	0	3903.7	6387	9149.1	3232.6	8935.6	23215.6	14265.3	13321	11515.7	8857.3	10789.5	4370.1	8687.8	6374.4	7639.2	13641.7	8340.8	6105.9	14072.2	13061.4	2475.3	2129.9	1801.7	744.2	1350.4	9119.8	2029.2	2435.2	2098	2829.5	5202.6	4370.1
FALSE	High	Master Protein	Q922D8	C-1-tetrahydrofolate synthase, cytoplasmic OS=Mus musculus OX=10090 GN=Mthfd1 PE=1 SV=4	0	142.676	40	34	66	33	34	935	101.1	7.14	204.94	34	0	8004.6	7900.4	6997.5	7723.5	5854.8	4437.5	2842.2	2800.2	3047.4	4868.9	6579.1	8183.5	5032.3	4093.4	7104.2	2300	5887	3145.1	2781.6	3065.9	5075.6	2634.6	1378	1778.1	884.8	1743.2	404.3	511.9	555.2	1555.4	3172.4	8183.5
FALSE	High	Master Protein	Q8VCT4	Carboxylesterase 1D OS=Mus musculus OX=10090 GN=Ces1d PE=1 SV=1	0	142.361	41	21	78	17	17	565	61.7	6.61	235.91	21	4	9906.6	10592.7	10686.2	4732	8978.7	12331.8	6133.7	7755.1	10668.8	6565.6	9095.4	6459.5	7520.5	7883.9	3900.7	5344.6	6930.5	4650	4916	6115.4	6281.6	3532.4	2104.4	1089.4	1356.9	4844.3	872.5	1417.7	1943.7	2097.4	4385.7	6459.5
FALSE	High	Master Protein	P16125	L-lactate dehydrogenase B chain OS=Mus musculus OX=10090 GN=Ldhb PE=1 SV=2	0	142.065	65	19	116	17	17	334	36.5	6.05	347.65	19	2	11413.3	12199.4	9154.6	3005	4772.9	3190.2	2078.1	1902.5	2738.4	4721.8	8217.5	9478.7	5594.6	4604.4	4029.8	2036.5	7461.1	2238	6485	1858.8	7237	4068.2	1802.8	691.8	721.3	1253.2	295.6	347.8	498.9	1508.4	3962.4	9478.7
FALSE	High	Master Protein	P09411	Phosphoglycerate kinase 1 OS=Mus musculus OX=10090 GN=Pgk1 PE=1 SV=4	0	141.845	58	20	73	16	20	417	44.5	7.9	227.99	20	0	15430.5	14146.7	11872.9	9944	6298.1	3799.1	3899.6	2951.7	3343.3	5682.8	11124.2	9786.7	9211.3	6507.4	4445.5	2751.8	5709.2	2356.9	2811.6	2886.8	9784.2	4717.6	2338.1	2289.3	951.8	1492.4	554.7	539.6	609.1	1815.4	5364	9786.7
FALSE	High	Master Protein	Q05793	Basement membrane-specific heparan sulfate proteoglycan core protein OS=Mus musculus OX=10090 GN=Hspg2 PE=1 SV=1	0	141.624	11	40	68	40	40	3707	398	6.32	196.49	40	0	2362	2748	4627.6	4470.5	4871.5	8122.3	5420.9	4839.5	5897.8	4375.6	3652.7	2191.2	3387.3	4037	6850.3	9543.8	3594.5	9653.3	5433.2	2860	1497.7	916.4	911.3	1029.2	736.2	3190.7	771.1	884.7	1074.5	1397.8	1761.3	2191.2
FALSE	High	Master Protein	P05064	Fructose-bisphosphate aldolase A OS=Mus musculus OX=10090 GN=Aldoa PE=1 SV=2	0	141.586	72	21	93	17	17	364	39.3	8.09	338.95	21	4	9611.2	13180.9	9252.1	8312.5	7292	6772.9	8879.6	7682.9	9235.1	9876.5	9440.5	10125.4	8993.3	8962.3	9064.9	5718.3	8220.5	6332.4	10852.4	12023.9	6094.3	4395.5	1822	1913.7	1102	2660.6	1263.1	1404.5	1682.5	3155.1	4552.1	10125.4
FALSE	High	Master Protein	P99024	Tubulin beta-5 chain OS=Mus musculus OX=10090 GN=Tubb5 PE=1 SV=1	0	140.11	53	19	147	3	3	444	49.6	4.89	385.95	19	2	1407.9	1034.9	1228.4	4409.3	1167.2	975.7	978.6	829.8	851.3	803.9	1462.7	639.9	688.6	571.5	1968.1	298.5	594.3	673.6	516.5	796.6	892.7	345.1	241.9	1015.1	176.4	383.3	139.2	151.7	155.1	256.8	705.3	639.9
FALSE	High	Master Protein	Q8R0Y6	Cytosolic 10-formyltetrahydrofolate dehydrogenase OS=Mus musculus OX=10090 GN=Aldh1l1 PE=1 SV=1	0	140.02	38	32	70	28	32	902	98.6	5.91	220.65	32	0	5670.7	6351.3	4874.4	2458.5	3002.2	2519.1	2078.1	2096.2	2444.8	5389.5	4020.8	10348.3	6150.7	5018.3	3523.4	2408.8	8420.8	2505.9	2964	2245.7	3595.7	2118	959.9	566	453.7	989.6	295.6	383.2	445.4	1721.7	1938.8	10348.3
FALSE	High	Master Protein	P10126	Elongation factor 1-alpha 1 OS=Mus musculus OX=10090 GN=Eef1a1 PE=1 SV=3	0	139.45	43	19	111	10	19	462	50.1	9.01	353.8	19	0	19219.5	17585.7	14569.8	18015.9	11256.2	5969.7	6175.2	5416.6	5593.2	12859.4	13823.6	20631.1	14679.1	13063	17130.5	5202.9	14434.3	7169.7	7817.8	5694.5	12186.8	5864.4	2869.2	4147.6	1701.1	2345.1	878.4	990.2	1019	4108	6665.6	20631.1
FALSE	High	Master Protein	P08074	Carbonyl reductase [NADPH] 2 OS=Mus musculus OX=10090 GN=Cbr2 PE=1 SV=1	0	139.362	72	17	190	16	16	244	25.9	9.01	541.36	17	1	21837.5	23498.2	18358.5	3819.4	9079.2	4063.6	3844.7	3747.1	4418	11714.6	12356.7	21155.3	18381.2	12903.8	4973.8	6723.4	16135.9	5005	6045.4	5974.6	13846.8	7836.1	3615.3	879.3	1372.1	1596.3	546.9	685	804.9	3742.3	5958.3	21155.3
FALSE	High	Master Protein	P97429	Annexin A4 OS=Mus musculus OX=10090 GN=Anxa4 PE=1 SV=4	0	138.254	69	22	77	21	21	319	35.9	5.57	241.73	22	0	11585.7	12299.5	7957.2	14570	5211.6	3944.4	4744.6	3125.7	3764.3	5354.1	7972.4	7998.4	9440.2	4730.1	2195.8	1638.7	5180.7	2025.2	2058.2	1383.2	7346.3	4101.6	1567	3354.3	787.6	1549.5	674.9	571.4	685.8	1710.4	3844.2	7998.4
FALSE	High	Master Protein	P40142	Transketolase OS=Mus musculus OX=10090 GN=Tkt PE=1 SV=1	0	137.833	42	24	76	24	24	623	67.6	7.5	257.11	24	0	18085.1	15713.6	14408.9	10036.5	13275.8	6603.1	8888.8	7117.8	6162.4	11046.3	11856.9	17286.6	13694.5	12755.2	8565	4912.4	13496.6	4772.4	5839.9	7912.1	11467.5	5240.1	2837.5	2310.6	2006.3	2593.9	1264.4	1301.2	1122.7	3528.8	5717.3	17286.6
FALSE	High	Master Protein	P27773	Protein disulfide-isomerase A3 OS=Mus musculus OX=10090 GN=Pdia3 PE=1 SV=2	0	137.723	56	28	75	27	28	505	56.6	6.21	228.21	28	0	13773.4	10060.1	7911.5	5166	6911.5	4453.3	2811.3	2858.7	3807.1	5338.8	7376.3	9292.7	6324.2	6933.6	3822.2	2319.7	7532.6	2017.5	2070.1	2264.5	8733.5	3354.8	1558	1189.3	1044.5	1749.4	399.9	522.6	693.6	1705.5	3556.8	9292.7
FALSE	High	Master Protein	P16406	Glutamyl aminopeptidase OS=Mus musculus OX=10090 GN=Enpep PE=1 SV=1	0	136.938	36	33	67	33	33	945	107.9	5.44	211.04	33	0	5613.3	7601.7	5841.7	3789	12553.2	3076.4	1634.5	3022.3	3207.2	4958.8	4635.3	7194.2	7858.7	7622.6	3195.1	3000	9073.2	2541.2	3653.8	1994.1	3559.3	2535	1150.4	872.3	1897.1	1208.5	232.5	552.5	584.3	1584.1	2235.1	7194.2
FALSE	High	Master Protein	Q01339	Beta-2-glycoprotein 1 OS=Mus musculus OX=10090 GN=Apoh PE=1 SV=1	0	136.31	55	20	109	20	20	345	38.6	8.22	349.61	20	0	4327.5	5757.8	6242.9	12378.2	7081.6	15515.8	33193	28537	34979.1	12442.8	12393.7	3453.5	6376.6	5797.2	14921.5	27755.6	6691.8	34375.7	28995	17120.1	2744	1920.1	1229.4	2849.7	1070.2	6095.1	4721.6	5216.8	6372.7	3974.9	5976.1	3453.5
FALSE	High	Master Protein	P08113	Endoplasmin OS=Mus musculus OX=10090 GN=Hsp90b1 PE=1 SV=2	0	135.877	38	30	80	29	29	802	92.4	4.82	226.53	30	0	11489.6	7902.2	7334.2	5588.6	7259.6	4299	3380.7	2953.9	3764.8	6476.3	6546.8	8977.2	6851.2	8995.8	3947.5	3551.8	7713	3006.4	4825.2	4323.5	7285.4	2635.2	1444.3	1286.6	1097.1	1688.8	480.9	540	685.9	2068.9	3156.8	8977.2
FALSE	High	Master Protein	P68368	Tubulin alpha-4A chain OS=Mus musculus OX=10090 GN=Tuba4a PE=1 SV=1	0	134.652	60	20	87	4	5	448	49.9	5.06	298.01	20	1	1679	1556.6	1263.4	1921.2	837.1	611.2	670.7	516.4	548.9	856.8	1133	1128.6	1003	758.4	1103.5	248.2	914.4	522.9	343.2	603.4	1064.6	519.1	248.8	442.3	126.5	240.1	95.4	94.4	100	273.7	546.3	1128.6
FALSE	High	Master Protein	Q00623	Apolipoprotein A-I OS=Mus musculus OX=10090 GN=Apoa1 PE=1 SV=2	0	134.508	58	22	233	21	21	264	30.6	5.73	704.4	22	1	4834.5	7882.7	5620.3	7982.4	7334.3	37482	38689.8	54667.6	33461.4	33229.1	24989.5	6074.8	9657.8	8692.1	43115.4	45084.2	13365.7	66303.1	53746.3	84411.2	3065.5	2628.7	1106.8	1837.7	1108.4	14724.1	5503.5	9993.7	6096.2	10615.2	12049.7	6074.8
FALSE	High	Master Protein	P70663	SPARC-like protein 1 OS=Mus musculus OX=10090 GN=Sparcl1 PE=1 SV=3	0	133.532	40	22	68	22	22	650	72.2	4.6	221.73	22	0	1530.4	1622.6	2506.5	1929.5	2155.2	3544.5	11428.7	10684.4	11852.7	5026.4	4770.7	1205.3	1596.1	2634.5	2427.3	4167.2	1629.3	14110.4	14486	12265.5	970.4	541.1	493.6	444.2	325.7	1392.4	1625.7	1953.2	2159.4	1605.7	2300.4	1205.3
FALSE	High	Master Protein	O08709	Peroxiredoxin-6 OS=Mus musculus OX=10090 GN=Prdx6 PE=1 SV=3	0	132.787	69	14	109	14	14	224	24.9	6.01	369.76	14	0	14625.4	15349.5	13335.4	9001.4	7211.2	3923.8	3296.4	2158.5	3220.3	6993.8	11669.5	14251.2	14192.1	8762.3	3521.5	1414.6	10002.4	1624.7	2219	2028.8	9273.7	5118.7	2626.1	2072.3	1089.8	1541.4	468.9	394.6	586.7	2234.2	5626.9	14251.2
FALSE	High	Master Protein	P17182	Alpha-enolase OS=Mus musculus OX=10090 GN=Eno1 PE=1 SV=3	0	131.886	50	18	71	14	15	434	47.1	6.8	240.24	18	3	10087.2	10017.5	7848.6	8908	6183.6	4845.1	4766.4	3866.3	3408.1	6165.5	7694.9	7953.5	7462.4	6469.1	4392.2	2297.8	5175.5	2628.2	3339.3	4951.2	6396.1	3340.6	1545.6	2050.8	934.5	1903.3	678	706.8	620.9	1969.6	3710.4	7953.5
FALSE	High	Master Protein	Q61696	Heat shock 70 kDa protein 1A OS=Mus musculus OX=10090 GN=Hspa1a PE=1 SV=2	0	131.769	43	25	79	0	18	641	70	5.72	246.13	25	0	4076.1	3634.4	3003.6	1114.2	2398.7	1032.2	1182.5	1067.2	1075.3	3542	2234.6	6824.9	4292.1	4494.2	1389.7	1019.7	3244.5	901.9	1014.8	1075.4	2584.6	1212	591.5	256.5	362.5	405.5	168.2	195.1	195.9	1131.5	1077.5	6824.9
FALSE	High	Master Protein	P42932	T-complex protein 1 subunit theta OS=Mus musculus OX=10090 GN=Cct8 PE=1 SV=3	0	131.576	53	27	66	27	27	548	59.5	5.62	201.34	27	0	7028.3	5988.7	5947.9	4653	6291.5	2506.7	2224.3	1916.2	2326.2	5198.9	4710.8	9812.4	6720.9	7171.1	4489.4	2027.7	6887.2	2429.3	2432.1	2597.1	4456.5	1997.1	1171.3	1071.2	950.8	984.7	316.4	350.3	423.8	1660.8	2271.5	9812.4
FALSE	High	Master Protein	O88342	WD repeat-containing protein 1 OS=Mus musculus OX=10090 GN=Wdr1 PE=1 SV=3	0	131.211	46	27	67	27	27	606	66.4	6.6	194.89	27	0	8923.6	8522.7	7100.1	7490.7	9869.3	4702.8	4080.9	3595	3654.5	8373	7596	12291.3	8962.1	7332.8	6357.9	3284	10171.7	3346.7	4726.6	5916.8	5658.3	2842.1	1398.2	1724.5	1491.5	1847.4	580.5	657.2	665.8	2674.8	3662.7	12291.3
FALSE	High	Master Protein	P11679	Keratin, type II cytoskeletal 8 OS=Mus musculus OX=10090 GN=Krt8 PE=1 SV=4	0	129.643	55	31	73	21	21	490	54.5	5.82	204.85	31	11	5298.7	6033.7	9977.3	6919.1	6949.2	9739.6	11523.6	14664.5	8371.7	6983.1	6941	4125.3	4936.3	10737.1	6115.3	11425.6	5711.8	10328.6	8588	5427.4	3359.8	2012.1	1964.8	1592.9	1050.2	3826	1639.2	2680.8	1525.2	2230.8	3346.9	4125.3
FALSE	High	Master Protein	P07356	Annexin A2 OS=Mus musculus OX=10090 GN=Anxa2 PE=1 SV=2	0	129.278	59	22	98	22	22	339	38.7	7.69	319.33	22	0	26984.1	24632.4	16702.1	12690.1	14694.5	6771.4	8726.4	5732.8	7209.7	9533.7	18157.8	17251.5	10889.3	11095.5	4432.4	3338.7	15526.8	3049.5	6775.1	3878.7	17110.2	8214.3	3289.1	2921.5	2220.7	2660	1241.3	1048	1313.5	3045.6	8755.5	17251.5
FALSE	High	Master Protein	Q7TMM9	Tubulin beta-2A chain OS=Mus musculus OX=10090 GN=Tubb2a PE=1 SV=1	0	128.833	49	17	138	1	2	445	49.9	4.89	366.13	17	0	182.9	132.5	156.4	777.5	135.6	162.4	163.1	132.4	124	530.9	243.9	190.5	413	307.8	1628.6	210.2	196.2	462.6	409.6	537.7	116	44.2	30.8	179	20.5	63.8	23.2	24.2	22.6	169.6	117.6	190.5
FALSE	High	Master Protein	A2AVA0	Sushi, von Willebrand factor type A, EGF and pentraxin domain-containing protein 1 OS=Mus musculus OX=10090 GN=Svep1 PE=1 SV=1	0	127.557	11	37	64	36	37	3567	387.2	5.57	170.62	37	0	1063.1	1334.4	1654.9	2661.8	2599.2	7882	14185.2	14777.2	13710.7	3365.4	4715.4	795	874.5	1046.6	4062	6473	1099.2	16885.9	7573.9	4112.7	674.1	445	325.9	612.8	392.8	3096.3	2017.8	2701.4	2497.9	1075.1	2273.7	795
FALSE	High	Master Protein	Q60864	Stress-induced-phosphoprotein 1 OS=Mus musculus OX=10090 GN=Stip1 PE=1 SV=1	0	127.496	52	30	67	30	30	543	62.5	6.8	200.94	30	0	10035.6	7768.5	8006	6359.2	7305.9	3417.8	2427.5	2373	2714.3	10921.7	6571.7	17505.2	14484.9	16083.6	10981.6	4552.6	13144.1	5736.3	5484.2	4222.6	6363.4	2590.6	1576.6	1464	1104.1	1342.6	345.3	433.8	494.5	3489	3168.8	17505.2
FALSE	High	Master Protein	P97333	Neuropilin-1 OS=Mus musculus OX=10090 GN=Nrp1 PE=1 SV=2	0	127.43	31	24	61	24	24	923	102.9	5.9	215.46	24	0	7361.2	7922.3	7366.2	3235.2	9298.3	2765.1	1710.4	2357.7	2424.4	4590.9	5143	6971.1	7624.4	7474.8	2193.5	2704.4	8296.4	2094.2	3499.4	1556.8	4667.6	2641.9	1450.6	744.8	1405.2	1086.2	243.3	431	441.7	1466.6	2479.9	6971.1
FALSE	High	Master Protein	O35639	Annexin A3 OS=Mus musculus OX=10090 GN=Anxa3 PE=1 SV=4	0	126.18	63	24	88	23	23	323	36.4	5.76	278.41	24	1	17005.2	14353.1	8876.9	58097.3	8678.9	7300.3	13166.6	6497	8041.8	12591.4	14029.9	11723.2	20942	10421.2	20395.3	5199.3	8687	8541.2	7922	5119.4	10782.7	4786.4	1748.1	13375.1	1311.6	2867.8	1872.9	1187.7	1465.1	4022.4	6765.1	11723.2
FALSE	High	Master Protein	P17156	Heat shock-related 70 kDa protein 2 OS=Mus musculus OX=10090 GN=Hspa2 PE=1 SV=2	0	125.712	42	27	81	14	14	633	69.6	5.67	225.61	27	2	3540.1	2929.1	4195.5	1499	2398	1040.4	963.8	1483	2001.3	2043.5	2561	3186.2	3046.9	4599.5	1631.9	942.3	2399.6	1057.8	1882.8	809.7	2244.7	976.8	826.2	345.1	362.4	408.7	137.1	271.1	364.6	652.8	1234.9	3186.2
FALSE	High	Master Protein	P63101	14-3-3 protein zeta/delta OS=Mus musculus OX=10090 GN=Ywhaz PE=1 SV=1	0	125.564	69	15	99	11	11	245	27.8	4.79	314.9	15	0	8643.7	9122.7	8370.1	4958.8	6852.6	3736	3553.7	3113.1	3365.2	9963.8	8026.1	17179.1	14237.9	11685	5196	2891.3	13648.5	3432.8	4846.8	5999.8	5480.8	3042.2	1648.3	1141.6	1035.6	1467.6	505.5	569.1	613.1	3183	3870.1	17179.1
FALSE	High	Master Protein	Q6ZQ38	Cullin-associated NEDD8-dissociated protein 1 OS=Mus musculus OX=10090 GN=Cand1 PE=1 SV=2	0	125.478	30	36	56	35	36	1230	136.2	5.78	153.41	36	0	5297.1	5110.1	4366.1	6496.9	4527.4	4032	3511.5	3236.7	3230.2	5200.1	4732.8	5861.8	4378.4	4260.7	7223.5	3179.6	5582.4	3416.5	4130.5	4557.9	3358.8	1704.1	859.8	1495.7	684.2	1583.9	499.5	591.7	588.5	1661.2	2282.1	5861.8
FALSE	High	Master Protein	Q61699	Heat shock protein 105 kDa OS=Mus musculus OX=10090 GN=Hsph1 PE=1 SV=2	0	125.176	33	28	58	26	26	858	96.3	5.53	172.96	28	0	5879.8	4355.3	5257.3	3021.5	6147.2	2710.6	1661.9	1657.5	2056.7	3372.6	3666	5182.8	4518	5768.6	2603.1	1609.5	3296.4	1457.6	2113.5	1784.9	3728.3	1452.4	1035.3	695.6	929	1064.8	236.4	303	374.7	1077.4	1767.7	5182.8
FALSE	High	Master Protein	Q06890	Clusterin OS=Mus musculus OX=10090 GN=Clu PE=1 SV=1	0	124.98	34	18	74	18	18	448	51.6	5.67	262.26	18	0	4522.3	6044.2	5519.8	7158.8	7170.9	15294.9	14297	17119	16816.9	11877.7	9929.3	4634.7	7421	6607	16553.9	19024.9	9953.7	23050.4	17403.8	20359.4	2867.5	2015.6	1087	1648.1	1083.7	6008.3	2033.7	3129.5	3063.8	3794.4	4787.8	4634.7
FALSE	High	Master Protein	P09103	Protein disulfide-isomerase OS=Mus musculus OX=10090 GN=P4hb PE=1 SV=2	0	124.978	51	28	77	28	28	509	57	4.88	237.41	28	0	16635.8	13599.5	13347.6	5456.1	9699.9	6819.5	4225.1	4274.4	4992.7	11060.4	11397.6	16384.1	13378.4	15954.7	5294.2	6457	14314.8	6477.2	8557.9	8272.7	10548.5	4535.1	2628.5	1256.1	1465.9	2678.9	601	781.4	909.6	3533.3	5495.8	16384.1
FALSE	High	Master Protein	P50516	V-type proton ATPase catalytic subunit A OS=Mus musculus OX=10090 GN=Atp6v1a PE=1 SV=2	0	124.789	47	25	58	25	25	617	68.3	5.58	183.3	25	0	7258.3	6770.8	6522.2	7340	5884.5	4681.4	4821.2	2690.8	3655.6	5255.5	6063.6	7699.3	5448.8	5172.6	4910.3	2717.5	6201.4	2817.8	3161.8	3985.7	4602.4	2257.9	1284.4	1689.8	889.3	1839	685.8	491.9	666	1678.9	2923.8	7699.3
FALSE	High	Master Protein	P48722	Heat shock 70 kDa protein 4L OS=Mus musculus OX=10090 GN=Hspa4l PE=1 SV=2	0	124.417	40	32	67	29	29	838	94.3	5.74	190.17	32	0	7221.1	5441.5	5941.3	3796.4	6106.2	2658.4	1969.8	1932.1	2279	6114.5	4130.9	8309.8	8741	11943.7	5154.3	2684.7	6252.7	2775.6	2763.4	2604.1	4578.8	1814.6	1170	874	922.8	1044.3	280.2	353.2	415.2	1953.3	1991.9	8309.8
FALSE	High	Master Protein	Q8BND5	Sulfhydryl oxidase 1 OS=Mus musculus OX=10090 GN=Qsox1 PE=1 SV=1	0	123.836	43	30	81	30	30	748	82.7	7.17	254.51	30	0	5974.4	7172.9	9769.1	7802.6	10653.4	21137.8	17665.8	15960.4	16468.9	6544	12155	3633	6184.6	6003.7	6393.5	9091.3	5291.1	7478.1	8043.6	9831.2	3788.3	2392	1923.8	1796.3	1610	8303.6	2512.9	2917.7	3000.4	2090.5	5861	3633
FALSE	High	Master Protein	Q9DCD0	6-phosphogluconate dehydrogenase, decarboxylating OS=Mus musculus OX=10090 GN=Pgd PE=1 SV=3	0	123.245	46	23	75	23	23	483	53.2	7.23	233.23	23	0	13396	13792	10598.8	7062.8	7252.9	4827.8	5555.8	5184.1	4740.8	9727.2	10158.4	17085.7	11794.1	10320.8	6596.9	3363.5	10961.4	3543.1	6106.2	5531.7	8494.2	4599.3	2087.2	1626	1096.1	1896.5	790.3	947.7	863.7	3107.4	4898.3	17085.7
FALSE	High	Master Protein	Q64726	Zinc-alpha-2-glycoprotein OS=Mus musculus OX=10090 GN=Azgp1 PE=1 SV=2	0	122.717	52	19	81	19	19	307	35.3	6.18	233.58	19	0	7055.7	10293.7	10567.9	7330	10860.5	16830.1	13409.1	14362.6	17853.7	7774.5	13155.2	4805.7	7424.1	6224.1	7646.6	9274.5	8551	11413.2	11587.6	11451.9	4473.9	3432.7	2081.1	1687.5	1641.3	6611.4	1907.4	2625.6	3252.7	2483.6	6343.3	4805.7
FALSE	High	Master Protein	P47738	Aldehyde dehydrogenase, mitochondrial OS=Mus musculus OX=10090 GN=Aldh2 PE=1 SV=1	0	122.23	45	20	72	17	18	519	56.5	7.62	257.35	20	0	9761.6	9980.6	7302.2	1543.3	3492.5	1552.3	1364.5	1392.2	1744.9	4214.1	5572.1	7684.8	8085.4	5816.8	1472.9	1706.6	5276.9	1341.3	1980.7	1216.8	6189.7	3328.3	1438	355.3	527.8	609.8	194.1	254.5	317.9	1346.2	2686.8	7684.8
FALSE	High	Master Protein	P11087	Collagen alpha-1(I) chain OS=Mus musculus OX=10090 GN=Col1a1 PE=1 SV=4	0	122.052	17	22	63	22	22	1453	137.9	5.85	202.54	22	0	1137.1	1288.5	1520.9	2035	2488.7	3249.7	11049.8	19102.5	5946.1	5124.7	4027	1800.2	2091.5	2185.5	3131	3862.1	1949.1	13376.4	16169.6	10549.1	721	429.7	299.5	468.5	376.1	1276.6	1571.8	3492.1	1083.3	1637.1	1941.8	1800.2
FALSE	High	Master Protein	O09131	Glutathione S-transferase omega-1 OS=Mus musculus OX=10090 GN=Gsto1 PE=1 SV=2	0	121.965	62	20	143	19	20	240	27.5	7.36	398.97	20	0	24690.4	24412.3	34497	8591.4	27968.9	8743.4	7179.8	6201	7827.7	17701.1	19651.2	30804.6	37956.9	32655.5	9251.4	8167.2	28310.9	7572	7631.9	5139.1	15655.8	8140.9	6793.4	1977.9	4226.8	3434.7	1021.3	1133.6	1426.1	5654.7	9475.6	30804.6
FALSE	High	Master Protein	Q91VI7	Ribonuclease inhibitor OS=Mus musculus OX=10090 GN=Rnh1 PE=1 SV=1	0	121.904	63	21	53	21	21	456	49.8	4.78	207.59	21	0	4790.2	4501.4	4154.3	4854.5	3509	2607.2	2255.9	2379.5	2261.4	2011.9	4169.7	2983.8	3771.3	2787.1	1943.3	1041.6	2146.6	1226.7	1641.7	1754.5	3037.4	1501.1	818.1	1117.6	530.3	1024.2	320.9	435	412	642.7	2010.6	2983.8
FALSE	High	Master Protein	Q11011	Puromycin-sensitive aminopeptidase OS=Mus musculus OX=10090 GN=Npepps PE=1 SV=2	0	120.774	35	31	58	31	31	920	103.3	5.9	176.85	31	0	9996.6	9173.4	6488.2	14078.3	6462.2	4373.4	3974.8	3585.2	3672.6	5023.9	7524	7133.9	5108.5	4052.5	7678	1832.9	5199.9	2546.4	3277.8	3516.7	6338.7	3059.1	1277.7	3241.1	976.6	1718	565.4	655.4	669.1	1604.9	3628	7133.9
FALSE	High	Master Protein	Q61703	Inter-alpha-trypsin inhibitor heavy chain H2 OS=Mus musculus OX=10090 GN=Itih2 PE=1 SV=1	0	119.531	26	23	62	23	23	946	105.9	7.27	185.22	23	0	2406.1	3911.8	4968.3	4556.1	4305.7	10556.4	9534.1	10874.8	11642.5	6256.9	6153.8	1922.3	3550.7	3417.4	8815.6	11624.9	4298.9	10999.7	8546.1	10175.7	1525.7	1304.5	978.4	1048.9	650.7	4146.9	1356.2	1988	2121.1	1998.8	2967.3	1922.3
FALSE	High	Master Protein	P28271	Cytoplasmic aconitate hydratase OS=Mus musculus OX=10090 GN=Aco1 PE=1 SV=3	0	118.458	42	35	67	34	35	889	98.1	7.5	182.45	35	0	9759.1	9484.6	6835.5	8897.6	5377	4662.1	3079.2	2703.9	3206.1	7964.5	7650.5	13277.4	8119.3	6146.6	10788.4	3568.6	8153.1	3360.5	5566	3440.6	6188.1	3162.9	1346.1	2048.4	812.6	1831.4	438	494.3	584.1	2544.3	3689	13277.4
FALSE	High	Master Protein	P62259	14-3-3 protein epsilon OS=Mus musculus OX=10090 GN=Ywhae PE=1 SV=1	0	118.057	76	19	85	16	16	255	29.2	4.74	264.25	19	4	14478.4	14691.3	12241.6	9642.1	10965.1	5854.2	4991.3	4132.2	4961.4	8514.5	11125.1	12206.6	11757.6	10128.9	6359.3	3081.8	11373.3	3353.6	4719.6	5908	9180.5	4899.2	2410.7	2219.8	1657.1	2299.7	710	755.4	903.9	2720	5364.4	12206.6
FALSE	High	Master Protein	Q99KC8	von Willebrand factor A domain-containing protein 5A OS=Mus musculus OX=10090 GN=Vwa5a PE=1 SV=2	0	117.648	33	24	57	24	24	793	87.1	6.58	178.07	24	0	7727.2	6473.3	5544.2	10018.7	5437.2	4142.2	3382.9	2967.6	3608.4	7117.7	6025	9339.5	8105.2	7426.7	9338.9	3304.4	7723.9	3611.1	4823.8	4421.2	4899.7	2158.7	1091.8	2306.5	821.7	1627.2	481.2	542.5	657.4	2273.8	2905.2	9339.5
FALSE	High	Master Protein	P24270	Catalase OS=Mus musculus OX=10090 GN=Cat PE=1 SV=4	0	114.417	53	24	60	24	24	527	59.8	7.88	170.66	24	0	5297.7	6259.5	4421.9	1586.8	2293.5	1578.5	1508.6	1532.2	1771.8	4244.1	2565.2	4833.1	3079.1	2752	6423.4	2232.1	4528.8	1934.8	1805.2	1312.9	3359.2	2087.4	870.8	365.3	346.6	620.1	214.6	280.1	322.8	1355.8	1236.9	4833.1
FALSE	High	Master Protein	P97298	Pigment epithelium-derived factor OS=Mus musculus OX=10090 GN=Serpinf1 PE=1 SV=2	0	114.042	54	19	64	19	19	417	46.2	6.98	197.99	19	0	4931.2	5421.1	4967.3	6007.8	6795.7	12066	9440.6	11028.5	8982	6596.9	6781.1	4370.1	5233.5	4530.1	7592.9	10582.5	5751.7	14274.9	8041.5	5327.7	3126.8	1807.8	978.2	1383.1	1027	4739.9	1342.9	2016.1	1636.4	2107.4	3269.8	4370.1
FALSE	High	Master Protein	P02088	Hemoglobin subunit beta-1 OS=Mus musculus OX=10090 GN=Hbb-b1 PE=1 SV=2	0	113.452	78	10	107	5	5	147	15.8	7.65	418.77	10	0	12859.2	12626.1	2659.9	4160.8	3141.8	11588.4	5136.8	4702.7	4830.2	5613	5719.7	1975.4	3366.2	1996.9	6138.6	11803	2311.7	1909.8	3184.9	3873.3	8153.8	4210.5	523.8	957.9	474.8	4552.3	730.7	859.7	880	1793.1	2758	1975.4
FALSE	High	Master Protein	Q9D0F9	Phosphoglucomutase-1 OS=Mus musculus OX=10090 GN=Pgm1 PE=1 SV=4	0	113.342	49	26	55	25	26	562	61.4	6.57	164.32	26	0	9860.1	12805.4	9388.2	5582.5	6484.7	3617.1	2652.4	2053.5	2886.1	7899.7	8128.7	15620.2	10231.5	6860.1	4755	2154	9302.1	2134.6	3376.4	3076.5	6252.1	4270.3	1848.8	1285.2	980	1420.9	377.3	375.4	525.8	2523.6	3919.6	15620.2
FALSE	High	Master Protein	P97494	Glutamate--cysteine ligase catalytic subunit OS=Mus musculus OX=10090 GN=Gclc PE=1 SV=4	0	113.334	44	22	61	22	22	637	72.5	5.9	190.18	22	0	10134.9	9026.1	6464.8	5867.9	5663.5	4632.8	4249.7	3297.4	3587	7381.3	7236.4	12218.9	8560.9	6109.8	7491.9	3013.2	6922.5	3856.7	4409.3	4181.4	6426.4	3010	1273.1	1350.9	855.9	1819.9	604.5	602.8	653.5	2358	3489.3	12218.9
FALSE	High	Master Protein	Q8VCM7	Fibrinogen gamma chain OS=Mus musculus OX=10090 GN=Fgg PE=1 SV=1	0	113.275	41	18	85	18	18	436	49.4	5.86	266.96	18	0	4307.3	5170.1	5468	8115.8	8493.6	14971.8	33280.9	32012.2	26215	10663.8	11437.4	3481	4598.2	4826.5	14789.7	20319.8	4265.2	29155.4	16018.6	15220.7	2731.2	1724.1	1076.8	1868.4	1283.6	5881.4	4734.1	5852.1	4776	3406.6	5515	3481
FALSE	High	Master Protein	Q91Z98	Chitinase-like protein 4 OS=Mus musculus OX=10090 GN=Chil4 PE=1 SV=2	0	112.872	48	16	61	9	9	402	44.9	6.19	213.64	16	0	138	167.9	1245.1	164.6	200.5	149.9	116	143.3	200.3	589.4	579	199.6	570.6	16366.1	159.5	678.8	314.4	264.5	546.5	187.9	87.5	56	245.2	37.9	30.3	58.9	16.5	26.2	36.5	188.3	279.2	199.6
FALSE	High	Master Protein	Q9CWJ9	Bifunctional purine biosynthesis protein ATIC OS=Mus musculus OX=10090 GN=Atic PE=1 SV=2	0	112.504	51	23	51	23	23	592	64.2	6.76	175.21	23	0	5509.2	4986.9	4125.9	4278.1	3366.1	2244.7	2092.1	2152.5	1959.5	3341.6	4104	4855.8	3714.9	3255.8	2944.9	1190.5	3248.4	1426.5	1810.1	2027.9	3493.3	1663	812.5	984.9	508.7	881.8	297.6	393.5	357	1067.5	1978.9	4855.8
FALSE	High	Master Protein	P63268	Actin, gamma-enteric smooth muscle OS=Mus musculus OX=10090 GN=Actg2 PE=1 SV=1	0	111.94	40	15	132	0	3	376	41.9	5.48	337.19	15	0	216.2	228.8	149.8	250.6	191.2	215.9	178.6	153.2	137.8	1043.7	248.4	1065.3	941.4	752.7	681.3	507.3	933.1	641.8	933	1342	137.1	76.3	29.5	57.7	28.9	84.8	25.4	28	25.1	333.4	119.8	1065.3
FALSE	High	Master Protein	Q03265	ATP synthase subunit alpha, mitochondrial OS=Mus musculus OX=10090 GN=Atp5f1a PE=1 SV=1	0	111.278	45	24	54	24	24	553	59.7	9.19	175.52	24	0	7637	5404.6	6319.6	2428.6	5163.3	1880.2	1746.3	1627.9	2034.2	3553.9	3783.4	5643.5	5856.6	5509.8	2218.8	1904.4	4754.6	1690.1	1556.4	1009.4	4842.5	1802.3	1244.5	559.1	780.3	738.6	248.4	297.6	370.6	1135.3	1824.3	5643.5
FALSE	High	Master Protein	O08529	Calpain-2 catalytic subunit OS=Mus musculus OX=10090 GN=Capn2 PE=1 SV=4	0	110.876	42	24	48	23	23	700	79.8	4.96	168	24	0	6256.7	6962.7	4638.8	16655	4622	3857.9	3813.1	2634.4	3027.1	4453.8	5634.3	3995.6	6543	3918.7	7770.6	2254	4143.7	3115.8	2982.2	3293.5	3967.3	2321.9	913.5	3834.3	698.5	1515.5	542.4	481.6	551.5	1422.8	2716.8	3995.6
FALSE	High	Master Protein	Q8BH61	Coagulation factor XIII A chain OS=Mus musculus OX=10090 GN=F13a1 PE=1 SV=3	0	110.607	31	22	56	21	22	732	83.2	5.92	169.1	22	0	1994.1	2962.4	2547.6	3583.5	2992.9	5250.6	12935.3	10729.3	8979.8	7011.9	6851.2	2097.7	3083.5	2610.8	4327.2	7521.9	2872.4	7897.7	11139.7	21435.7	1264.4	987.9	501.7	825	452.3	2062.6	1840	1961.4	1636	2240	3303.6	2097.7
FALSE	High	Master Protein	P08249	Malate dehydrogenase, mitochondrial OS=Mus musculus OX=10090 GN=Mdh2 PE=1 SV=3	0	110.354	64	18	45	18	18	338	35.6	8.68	154.48	18	0	12488.6	9051.3	9742.2	5128.2	6862.5	3748.7	3359.7	3065.5	3678.7	6489.5	6395	9357.1	8575	8849.6	4164.4	3992.7	8369.8	4262.4	2350.4	2254.3	7918.8	3018.4	1918.5	1180.6	1037.1	1472.6	477.9	560.4	670.2	2073.1	3083.6	9357.1
FALSE	High	Master Protein	P21180	Complement C2 OS=Mus musculus OX=10090 GN=C2 PE=1 SV=2	0	110.078	33	24	52	23	24	760	84.7	7.56	156.26	24	0	2750.1	3083.3	3450	4066.6	3687	7840	5858.1	5262.9	6057.5	5194.5	4287.1	2592.9	4064.1	3510.5	8022.1	9081.1	3896.4	7898.5	5085.8	5595.6	1743.8	1028.2	679.4	936.2	557.2	3079.8	833.3	962.1	1103.6	1659.4	2067.2	2592.9
FALSE	High	Master Protein	Q9WVA4	Transgelin-2 OS=Mus musculus OX=10090 GN=Tagln2 PE=1 SV=4	0	109.617	75	14	70	12	12	199	22.4	8.24	197.56	14	3	8230.3	6869.2	4448.3	11853.9	5801.2	2659.9	3098.1	2595.1	2891.5	4329.6	5849.6	6436.2	5268.8	4019.9	4151.8	3901.5	6114.8	2368.1	2803.3	1986	5218.7	2290.7	876	2729	876.7	1044.9	440.7	474.4	526.8	1383.1	2820.6	6436.2
FALSE	High	Master Protein	Q61114	BPI fold-containing family B member 1 OS=Mus musculus OX=10090 GN=Bpifb1 PE=2 SV=4	0	109.506	46	20	69	20	20	474	52.4	6.38	224.74	20	0	11887.4	12318.1	15710.4	3230	8536	5849.3	5334.4	4055.1	5646.4	6556.8	6764.6	6349.4	11673.5	22569.8	3824.5	3808.8	8016.5	7218	2512.5	2033.8	7537.6	4107.8	3093.8	743.6	1290	2297.8	758.8	741.3	1028.7	2094.6	3261.8	6349.4
FALSE	High	Master Protein	P50404	Pulmonary surfactant-associated protein D OS=Mus musculus OX=10090 GN=Sftpd PE=1 SV=1	0	109.501	36	11	110	11	11	374	37.7	7.65	337.48	11	0	6826.4	9494.2	7951.2	11477.8	19108	11180.9	17797.9	18628.8	18097.4	8656.3	10345.1	6836.9	8221.5	9014.5	9691.5	22845.4	9847.9	28788.4	10653.9	3047.1	4328.5	3166.1	1565.8	2642.4	2887.7	4392.2	2531.7	3405.5	3297.1	2765.3	4988.3	6836.9
FALSE	High	Master Protein	Q61247	Alpha-2-antiplasmin OS=Mus musculus OX=10090 GN=Serpinf2 PE=1 SV=1	0	109.239	34	20	91	20	20	491	54.9	6.3	276.39	20	0	5468.2	8141.2	7588.1	9578.3	8899.3	17359.1	14105.1	15363.6	15086.8	14245.2	10576.1	6665.2	9739.2	8816.2	19424.1	22224.2	12720.8	23767.1	20988.5	19037.8	3467.3	2714.9	1494.3	2205.1	1344.9	6819.2	2006.4	2808.6	2748.6	4550.7	5099.7	6665.2
FALSE	High	Master Protein	P97821	Dipeptidyl peptidase 1 OS=Mus musculus OX=10090 GN=Ctsc PE=1 SV=1	0	108.692	36	16	54	16	16	462	52.3	6.89	191.67	16	0	4555.5	5035.1	6168.3	3180.5	8154.8	3659.3	2217.3	1787.7	2651.7	4718.3	3850.8	5964.5	7015	6541.7	2852.8	4195.6	6387	2356.9	2018.4	1436.9	2888.6	1679.1	1214.7	732.2	1232.4	1437.5	315.4	326.8	483.1	1507.3	1856.8	5964.5
FALSE	High	Master Protein	P97290	Plasma protease C1 inhibitor OS=Mus musculus OX=10090 GN=Serping1 PE=1 SV=3	0	108.532	38	15	52	15	15	504	55.5	6.29	192.32	15	0	1945.2	3010.1	2514.1	4208.6	3496.4	10837.5	9899	11294.9	11723.2	6858.2	5549.5	1914.5	3030.2	2541.4	8832.9	12108.8	3912.2	16128.7	11287.8	10851.9	1233.4	1003.8	495.1	968.9	528.4	4257.3	1408.1	2064.8	2135.8	2190.9	2675.9	1914.5
FALSE	High	Master Protein	Q922U2	Keratin, type II cytoskeletal 5 OS=Mus musculus OX=10090 GN=Krt5 PE=1 SV=1	0	107.915	26	23	69	10	10	580	61.7	7.75	192.17	23	7	2569.8	6416.7	10453.6	7564.5	6207.4	6663.9	19078.1	21751.7	14898.5	5911	6489.3	2360.1	3388.6	12311.9	8106.3	16543.1	4042.9	12659.7	8804.7	2258	1629.5	2139.8	2058.6	1741.5	938.1	2617.8	2713.8	3976.4	2714.3	1888.3	3129.1	2360.1
FALSE	High	Master Protein	P01872	Immunoglobulin heavy constant mu OS=Mus musculus OX=10090 GN=Ighm PE=1 SV=2	0	107.65	41	18	73	18	18	454	49.9	7.01	241.33	18	0	1622.2	3628.1	4261	6667.1	3462.7	8735	16074.2	19601.4	11022.8	8539.9	6614	1680	2147	3104.7	16867.7	31333.7	7526.9	19693.3	13910.1	11616.3	1028.6	1209.9	839.1	1534.9	523.3	3431.4	2286.5	3583.3	2008.2	2728.1	3189.2	1680
FALSE	High	Master Protein	Q99PL5	Ribosome-binding protein 1 OS=Mus musculus OX=10090 GN=Rrbp1 PE=1 SV=2	0	107.582	34	36	52	36	36	1605	172.8	9.33	121.87	36	0	2115.5	1494	2134.3	1583.7	1430.6	1487.9	1522	1750.5	1389.2	3888.8	1738.7	4259	3327.9	3475.4	2567.6	2831.4	3128.7	2803.1	3970.4	4984.7	1341.4	498.2	420.3	364.6	216.2	584.5	216.5	320	253.1	1242.3	838.4	4259
FALSE	High	Master Protein	P56480	ATP synthase subunit beta, mitochondrial OS=Mus musculus OX=10090 GN=Atp5f1b PE=1 SV=2	0	107.578	47	18	49	18	18	529	56.3	5.34	169.57	18	0	5752.1	4265.7	5155.2	1838.2	2781.1	1488.9	1201.4	1163	1451.3	3437.4	2689.8	4609	6623.6	5969.4	1291.5	1370.1	3160.6	1381.7	1279.7	887	3647.3	1422.5	1015.2	423.2	420.3	584.9	170.9	212.6	264.4	1098.1	1297	4609
FALSE	High	Master Protein	P29699	Alpha-2-HS-glycoprotein OS=Mus musculus OX=10090 GN=Ahsg PE=1 SV=1	0	107.498	44	10	111	10	10	345	37.3	6.51	389.38	10	0	5549.3	7127	9050	8353.4	11763.1	18096.1	10950	12228.1	12469.1	10069	10454.4	5336.9	7348.8	6904.2	12166.5	10369.4	8012.1	14238.7	14697.7	13974.9	3518.7	2376.7	1782.2	1923.1	1777.7	7108.7	1557.6	2235.4	2271.7	3216.6	5041	5336.9
FALSE	High	Master Protein	Q00519	Xanthine dehydrogenase/oxidase OS=Mus musculus OX=10090 GN=Xdh PE=1 SV=5	0	107.203	20	29	52	26	27	1335	146.5	7.56	159.74	29	0	4581.1	4641.7	3799.4	4945.7	3895.5	3729.6	5975.5	5866.2	6237	4723	5499.9	3917.9	3004.7	2682.6	4720.9	3282.5	3572.7	4272.7	5600.9	8422.6	2904.8	1547.9	748.2	1138.6	588.7	1465.1	850	1072.4	1136.3	1508.8	2652	3917.9
FALSE	High	Master Protein	P63038	60 kDa heat shock protein, mitochondrial OS=Mus musculus OX=10090 GN=Hspd1 PE=1 SV=1	0	106.874	47	23	56	23	23	573	60.9	6.18	189.41	23	0	12565.2	10721.6	10796.4	3345.5	5862	2353.4	2904.8	2181	2796	5933.9	6215.8	8759.8	11613.6	10382	2691	2787.6	6339.3	2526.6	2890.6	2233.9	7967.4	3575.4	2126.1	770.2	885.9	924.5	413.2	398.7	509.4	1895.6	2997.2	8759.8
FALSE	High	Master Protein	P11983	T-complex protein 1 subunit alpha OS=Mus musculus OX=10090 GN=Tcp1 PE=1 SV=3	0	106.232	46	21	50	21	21	556	60.4	6.16	166.32	21	0	6314.9	5781.2	5095.8	5120.3	5332	2526	2621.5	1781.1	2257.6	3413	4358.9	5838.6	4339.7	4560.3	5149.2	1733.6	4089.3	2992.6	1857.7	1615.6	4004.2	1927.9	1003.5	1178.8	805.8	992.3	372.9	325.6	411.3	1090.3	2101.8	5838.6
FALSE	High	Master Protein	O09159	Lysosomal alpha-mannosidase OS=Mus musculus OX=10090 GN=Man2b1 PE=1 SV=4	0	105.487	29	24	51	24	24	1013	114.6	8.13	173.2	24	0	6349.3	6568.7	7670.3	10900.9	12432.8	11200.7	6550.6	6136.5	6701.9	3777.1	7541.4	3953.5	3591.2	3843.6	4928	6119	4012.5	3562.9	2337.8	2131	4026	2190.5	1510.5	2509.6	1878.9	4400	931.8	1121.8	1221	1206.6	3636.4	3953.5
FALSE	High	Master Protein	Q80X90	Filamin-B OS=Mus musculus OX=10090 GN=Flnb PE=1 SV=3	0	105.072	11	31	52	24	24	2602	277.7	5.71	127.33	31	0	2973.9	2460.1	2438	2096.7	2331.8	2435.9	2073.2	1955.6	1842.6	1948	2064.1	1862.6	1744.9	1867.1	1962.5	1410.2	1786.3	1641.9	1907.3	1726.2	1885.7	820.4	480.1	482.7	352.4	956.9	294.9	357.5	335.7	622.3	995.3	1862.6
FALSE	High	Master Protein	P40124	Adenylyl cyclase-associated protein 1 OS=Mus musculus OX=10090 GN=Cap1 PE=1 SV=4	0	104.796	43	16	52	15	15	474	51.5	7.52	176.57	16	1	5558.1	5372.8	3422.6	5622	4767.6	2482.5	4159.7	4241.6	2719.2	3765.2	5057.5	4813.8	3481.5	3095.7	3183.4	1594.9	4298.4	1869.3	3046.5	4328.7	3524.3	1791.7	674	1294.3	720.5	975.2	591.7	775.4	495.4	1202.8	2438.7	4813.8
FALSE	High	Master Protein	P06151	L-lactate dehydrogenase A chain OS=Mus musculus OX=10090 GN=Ldha PE=1 SV=3	0	104.74	46	16	70	13	14	332	36.5	7.74	226.13	16	0	12482.4	13903.2	10530.3	9708.6	11650	5657.1	4261.6	3385.5	3931.7	6134.8	10050.2	10324.2	7933.9	6427.4	7218.8	2520.4	7946.3	2704.1	2606.2	2877.5	7914.9	4636.4	2073.7	2235.1	1760.6	2222.3	606.2	618.9	716.3	1959.8	4846.1	10324.2
FALSE	High	Master Protein	Q9JHR7	Insulin-degrading enzyme OS=Mus musculus OX=10090 GN=Ide PE=1 SV=1	0	103.956	23	26	58	26	26	1019	117.7	6.54	158.32	26	0	4419.3	4185.9	3882.6	2469.4	3251.6	2028.6	1564.2	1518	1568.7	4572.2	3336.4	7095.2	5723.6	5633.1	4156	1908	5597	2117.4	2997.6	2826.7	2802.2	1395.9	764.6	568.5	491.4	796.9	222.5	277.5	285.8	1460.6	1608.8	7095.2
FALSE	High	Master Protein	O35350	Calpain-1 catalytic subunit OS=Mus musculus OX=10090 GN=Capn1 PE=1 SV=1	0	103.826	42	28	50	27	27	713	82.1	5.87	153.8	28	1	5384.9	5323.9	4482.4	4709	5311.5	2872.5	3314	2666.2	2684.1	5711	4397	7772	6898.3	6295.2	5585	3726.3	7861.3	3391.5	3692.3	3463	3414.5	1775.4	882.7	1084.1	802.7	1128.4	471.4	487.4	489	1824.4	2120.2	7772
FALSE	High	Master Protein	Q8CGC7	Bifunctional glutamate/proline--tRNA ligase OS=Mus musculus OX=10090 GN=Eprs1 PE=1 SV=4	0	103.556	22	33	56	31	31	1512	170	7.66	135.95	33	2	5193.2	4730.5	4673.8	4765.9	4228.9	2179.6	1885.5	1886.7	2299.3	4151.1	3600.4	6312.5	4244.1	4634.6	5015.5	2108.8	4860.3	2414.6	2321	1941.5	3292.9	1577.5	920.4	1097.2	639.1	856.2	268.2	344.9	418.9	1326.1	1736.1	6312.5
FALSE	High	Master Protein	Q9CPY7	Cytosol aminopeptidase OS=Mus musculus OX=10090 GN=Lap3 PE=1 SV=3	0	103.345	50	22	50	22	22	519	56.1	7.72	158.74	22	0	6114	4943.1	4813.4	4498.3	3593.7	3019.6	2348	1937.5	2640.7	3435.5	4070.6	5668.6	3863.3	4143.2	4533.4	2496.4	4090.3	2132.9	2404.9	2054.2	3876.8	1648.4	947.9	1035.6	543.1	1186.2	334	354.2	481.1	1097.5	1962.8	5668.6
FALSE	High	Master Protein	P38647	Stress-70 protein, mitochondrial OS=Mus musculus OX=10090 GN=Hspa9 PE=1 SV=3	0	103.035	39	23	45	22	22	679	73.4	6.07	137.27	23	0	5296.5	3865	3896.9	1636.3	2783.8	1090.5	932.9	851.2	1150.5	3566.7	2848	6435.5	5186.9	3844.4	1551	1439.4	4860.1	1242.2	1531.3	1315.2	3358.4	1288.9	767.4	376.7	420.7	428.4	132.7	155.6	209.6	1139.4	1373.3	6435.5
FALSE	High	Master Protein	P16858	Glyceraldehyde-3-phosphate dehydrogenase OS=Mus musculus OX=10090 GN=Gapdh PE=1 SV=2	0	102.833	52	14	66	12	14	333	35.8	8.25	251.23	14	0	10533.9	11746	9485.7	10658.5	8167.4	2773.5	3011.7	2277.2	2515.6	8321.7	7363.5	11275.2	11906.4	10186.1	12608.8	3896.4	11133.8	5305.6	3913.8	3405.9	6679.4	3917	1868	2453.8	1234.3	1089.5	428.4	416.3	458.3	2658.4	3550.6	11275.2
FALSE	High	Master Protein	Q922J3	CAP-Gly domain-containing linker protein 1 OS=Mus musculus OX=10090 GN=Clip1 PE=1 SV=1	0	102.649	21	32	46	27	27	1391	155.7	5.24	118.71	32	5	3451.4	2949.2	3084.4	3119.2	3068.3	1632.3	1757.5	1965.4	1781.7	2995.4	2550.9	3749	3246.4	3582.3	3485	1571.5	3309.6	2193.2	2726.4	2702	2188.5	983.5	607.4	718.1	463.7	641.2	250	359.3	324.6	956.9	1230	3749
FALSE	High	Master Protein	P17710	Hexokinase-1 OS=Mus musculus OX=10090 GN=Hk1 PE=1 SV=3	0	102.266	29	27	51	23	25	974	108.2	6.8	153.8	27	2	11514.7	9144.9	10479.5	3848.9	6372.9	3456.4	2509.7	2272.3	3109.5	4286.7	5440.6	6482.7	5470.4	5466.5	2588.6	1884.7	4965.1	2253.5	1757.7	1846.5	7301.3	3049.6	2063.7	886.1	963.1	1357.8	357	415.4	566.5	1369.4	2623.4	6482.7
FALSE	High	Master Protein	O70362	Phosphatidylinositol-glycan-specific phospholipase D OS=Mus musculus OX=10090 GN=Gpld1 PE=1 SV=1	0	101.889	27	21	54	21	21	837	93.2	7.12	145.53	21	0	1004.6	1635.5	1643.2	1716.6	1518.6	4546	9609.4	9781.3	9572.6	3962.7	3616.8	1020.8	1675.4	2664.7	4359	7666.5	2005.1	9977.2	8573.3	6943.7	637	545.4	323.6	395.2	229.5	1785.8	1366.9	1788.1	1744	1265.9	1744	1020.8
FALSE	High	Master Protein	Q8BPB5	EGF-containing fibulin-like extracellular matrix protein 1 OS=Mus musculus OX=10090 GN=Efemp1 PE=1 SV=1	0	101.636	38	17	59	17	17	493	54.9	5.14	170.95	17	0	2275.7	3095	3021.4	3055.8	3187.4	2963.4	4727.7	3414	3171.5	3385.8	2750.4	3028.1	4082.6	3403.5	2707.4	3675.9	3522.4	4638.8	3919.4	2566.7	1443	1032.1	595	703.5	481.7	1164.1	672.5	624.1	577.8	1081.6	1326.2	3028.1
FALSE	High	Master Protein	Q9ERD7	Tubulin beta-3 chain OS=Mus musculus OX=10090 GN=Tubb3 PE=1 SV=1	0	101.361	35	13	64	1	1	450	50.4	4.93	170.75	13	1	295.2	255.2	226.5	249.8	148.9	156.6	152.6	170.7	161.4		280.2										187.2	85.1	44.6	57.5	22.5	61.5	21.7	31.2	29.4		135.1
FALSE	High	Master Protein	Q9D0R2	Threonine--tRNA ligase 1, cytoplasmic OS=Mus musculus OX=10090 GN=Tars1 PE=1 SV=2	0	101.312	37	24	44	23	24	722	83.3	7.36	129.78	24	0	4890	4553.6	3668.9	3150	2922.1	1728.5	1396.2	1277.3	1480.9	3957.7	3259.7	6815.6	4323.8	3687.6	3709	1443.8	4734.6	1567	2235.1	2356.8	3100.7	1518.5	722.5	725.2	441.6	679	198.6	233.5	269.8	1264.3	1571.8	6815.6
FALSE	High	Master Protein	P02089	Hemoglobin subunit beta-2 OS=Mus musculus OX=10090 GN=Hbb-b2 PE=1 SV=2	0	100.911	78	11	76	5	6	147	15.9	8.05	269.42	11	5	8845.8	8872	3671.4	3699.1	4250.8	7254.8	4234.2	4042.5	4566.2	7551.6	4215.8	1439.3	2827.2	1824.6	9931.3	7813.2	1724.4	1991.6	3039.5	3716.9	5609	2958.6	723	851.6	642.4	2849.9	602.3	739	831.9	2412.4	2032.8	1439.3
FALSE	High	Master Protein	P47739	Aldehyde dehydrogenase, dimeric NADP-preferring OS=Mus musculus OX=10090 GN=Aldh3a1 PE=1 SV=2	0	100.645	40	21	81	18	20	453	50.4	6.95	233.03	21	2	15176.4	14731.5	11526.6	6774.9	7141.8	2691.7	2384.6	1910.2	2479.3	6005.2	9647.4	10502.4	7390.2	6989.9	4683.5	2455.5	7552.8	2226	2300.1	1735.9	9623.1	4912.6	2269.9	1559.7	1079.3	1057.4	339.2	349.2	451.7	1918.4	4651.9	10502.4
FALSE	High	Master Protein	Q61554	Fibrillin-1 OS=Mus musculus OX=10090 GN=Fbn1 PE=1 SV=2	0	100.616	11	35	54	31	35	2873	312.1	4.92	132.82	35	0	977	1198.6	1816.9	2492	2400	5382.2	10851.6	10528.5	6373.7	3854.7	3621.6	906.1	1449.9	2102.2	4604	5873.8	1359.2	10789.5	9378.4	7757	619.5	399.7	357.8	573.7	362.7	2114.3	1543.6	1924.7	1161.2	1231.4	1746.3	906.1
FALSE	High	Master Protein	Q3U1J4	DNA damage-binding protein 1 OS=Mus musculus OX=10090 GN=Ddb1 PE=1 SV=2	0	100.525	26	31	55	31	31	1140	126.8	5.26	148.6	31	0	6454.7	5584.2	4676.3	5138.6	4915.1	3205.4	2528.7	2245	3487.6	4342.1	4574.5	5928.2	4615.8	4809.3	4359	2187.6	5001.3	2035.6	2558.6	3464.8	4092.8	1862.2	920.9	1183	742.8	1259.2	359.7	410.4	635.4	1387.1	2205.8	5928.2
FALSE	High	Master Protein	P13597	Intercellular adhesion molecule 1 OS=Mus musculus OX=10090 GN=Icam1 PE=1 SV=1	0	100.319	30	15	58	15	15	537	58.8	6.13	210.04	15	0	9873.9	12208.4	14506.4	6818.3	19538.8	10755.8	3950.2	5390.3	5026.2	8612.5	9498.3	10154.5	15752.1	15419.9	6232.2	7803.7	13813.3	5029.1	3532.2	3210.5	6260.9	4071.2	2856.7	1569.7	2952.8	4225.2	561.9	985.4	915.7	2751.3	4580	10154.5
FALSE	High	Master Protein	Q922B2	Aspartate--tRNA ligase, cytoplasmic OS=Mus musculus OX=10090 GN=Dars1 PE=1 SV=2	0	100.136	58	27	50	27	27	501	57.1	6.49	140.85	27	0	4815.8	4531.7	4024.8	5100.8	3373.4	2609.8	2348	2096.7	2504	4718.7	3719.1	7627.7	5371.8	5322	6162.5	2557.7	5870.7	2594.7	2520.9	3007.4	3053.6	1511.2	792.6	1174.3	509.8	1025.2	334	383.3	456.2	1507.4	1793.3	7627.7
FALSE	High	Master Protein	O54754	Aldehyde oxidase 1 OS=Mus musculus OX=10090 GN=Aox1 PE=1 SV=2	0	100.106	22	30	54	28	28	1333	146.6	7.02	145.01	30	0	3886.1	4736.2	3508.9	1154.6	2124.7	1899.3	1654.2	1617	1890.4	2756.3	3346.4	5423.1	3333.6	2450.8	1726.8	2384	3902.1	1048.4	2089	1054.3	2464.1	1579.4	691	265.8	321.1	746.1	235.3	295.6	344.4	880.5	1613.6	5423.1
FALSE	High	Master Protein	P80318	T-complex protein 1 subunit gamma OS=Mus musculus OX=10090 GN=Cct3 PE=1 SV=1	0	99.667	41	23	49	23	23	545	60.6	6.7	143.49	23	0	8039.3	6796.6	6705	6036.9	5940.8	3002.8	2657.4	2629	2910.2	3269	5588.9	5532.7	3867.7	3996.2	4343.5	1619	4019.5	2197.5	2240.7	1596.3	5097.6	2266.5	1320.4	1389.8	897.8	1179.6	378	480.6	530.2	1044.3	2694.9	5532.7
FALSE	High	Master Protein	Q99KK7	Dipeptidyl peptidase 3 OS=Mus musculus OX=10090 GN=Dpp3 PE=1 SV=2	0	99.386	36	24	47	23	24	738	82.8	5.38	147.91	24	0	4203.2	3899.5	2728.4	5436.1	3450.1	2031.7	1621.1	1477.5	1554.5	4128.9	3115.8	6314	5767.2	4904	4781.7	1748.2	4904.9	1971.8	2599.9	2457.5	2665.2	1300.4	537.3	1251.5	521.4	798.1	230.6	270.1	283.2	1319	1502.4	6314
FALSE	High	Master Protein	P42703	Leukemia inhibitory factor receptor OS=Mus musculus OX=10090 GN=Lifr PE=1 SV=1	0	99.201	20	20	58	20	20	1092	122.5	6.04	169.05	20	0	4213.8	5256.5	6321.1	3657.4	7605.6	18010.3	3860.9	3963.2	3942.7	3669.7	6340.2	3171.7	5616.6	6088.6	5309.6	6465.7	4804.6	2238.9	2430.1	1694.9	2671.9	1752.9	1244.8	842	1149.4	7075	549.2	724.5	718.3	1172.3	3057.2	3171.7
FALSE	High	Master Protein	P48678	Prelamin-A/C OS=Mus musculus OX=10090 GN=Lmna PE=1 SV=2	0	98.974	38	27	53	26	26	665	74.2	6.98	161.03	27	1	4218.1	3772.7	3524.1	4672.5	5332.7	5943.8	8652.6	7240.9	6414.3	7654	4877.5	5238	5059.2	6194.7	6527.2	6417.5	7417.5	8390.4	11580.7	11083.4	2674.6	1258.1	694	1075.7	805.9	2334.9	1230.8	1323.7	1168.6	2445.1	2351.9	5238
FALSE	High	Master Protein	P18242	Cathepsin D OS=Mus musculus OX=10090 GN=Ctsd PE=1 SV=1	0	98.611	41	13	59	13	13	410	44.9	7.15	192.09	13	0	10636.9	8238.7	11069.1	10138.6	14161.8	13806.7	4978.7	4686.3	6306.7	6539.3	10898.6	10577	8260.2	7534.4	4332.3	7784.7	8681.1	3718	2647.4	2709.1	6744.7	2747.4	2179.8	2334.1	2140.2	5423.7	708.2	856.7	1149	2089	5255.2	10577
FALSE	High	Master Protein	P09405	Nucleolin OS=Mus musculus OX=10090 GN=Ncl PE=1 SV=2	0	98.318	34	25	56	25	25	707	76.7	4.75	152.35	25	0	8843.5	6679.3	7526.6	4761.1	7382.6	4096.4	8797.4	7763.3	5932.4	4758.7	7013.4	5521.7	4185.1	4851	2782.2	3203.7	3968.2	3096	3535.7	6015.7	5607.5	2227.4	1482.2	1096.1	1115.7	1609.2	1251.4	1419.2	1080.8	1520.2	3381.8	5521.7
FALSE	High	Master Protein	Q8VDJ3	Vigilin OS=Mus musculus OX=10090 GN=Hdlbp PE=1 SV=1	0	97.672	23	29	48	29	29	1268	141.7	6.87	124.18	29	0	4203.2	3499.8	3671.4	2815.1	3315.8	1589.5	1523.4	1616.4	1544.6	2417.2	2565.8	3630.3	2484.7	3174.9	3438.7	1519	2914.9	1522.2	1831.1	1476.6	2665.2	1167.1	723	648.1	501.1	624.4	216.7	295.5	281.4	772.2	1237.2	3630.3
FALSE	High	Master Protein	Q00612	Glucose-6-phosphate 1-dehydrogenase X OS=Mus musculus OX=10090 GN=G6pdx PE=1 SV=3	0	97.6	44	24	52	16	24	515	59.2	6.49	155.97	24	0	10772.9	8794.3	6833	7717	5735.6	2887.2	3591.6	3359.8	3124.8	4663.9	6367	6872.1	5378.4	5598.8	3983.5	1835.8	5416	2058.8	2616.7	3084.5	6830.9	2932.7	1345.6	1776.6	866.8	1134.2	510.9	614.2	569.3	1489.9	3070.1	6872.1
FALSE	High	Master Protein	Q76MZ3	Serine/threonine-protein phosphatase 2A 65 kDa regulatory subunit A alpha isoform OS=Mus musculus OX=10090 GN=Ppp2r1a PE=1 SV=3	0	97.429	44	22	49	15	22	589	65.3	5.11	161.91	22	0	5971	5564.1	4233.5	7300.4	5083.9	3145.4	3286.5	2894.3	2698.9	5587.3	5028.1	7159.8	5228.7	5023.2	6993.9	2275.9	5774.2	2648.1	3460.9	5490	3786.1	1855.5	833.7	1680.7	768.3	1235.6	467.5	529.1	491.7	1784.9	2424.5	7159.8
FALSE	High	Master Protein	P24527	Leukotriene A-4 hydrolase OS=Mus musculus OX=10090 GN=Lta4h PE=1 SV=4	0	96.817	38	21	50	21	21	611	69	6.42	174.6	21	0	8005.7	7394.2	4860.2	6599.4	5164.6	3661.6	3444.7	2863.7	2829.5	4299.5	5695.5	6043.7	4865.4	3828	3269.5	1862.1	5016.6	1653.1	2086.9	3079	5076.3	2465.8	957.1	1519.3	780.5	1438.4	490	523.5	515.5	1373.5	2746.3	6043.7
FALSE	High	Master Protein	Q60854	Serpin B6 OS=Mus musculus OX=10090 GN=Serpinb6 PE=1 SV=1	0	96.4	44	15	56	15	15	378	42.6	5.74	169.25	15	0	8460.7	8030	4885.6	15340.6	4907.9	3212.3	2674.9	2109.3	2322.9	6118.2	5613.8	6791.8	11467.4	5978.4	6728.3	2030.7	5021	2419.8	3055.6	3019.2	5364.8	2677.8	962.1	3531.7	741.7	1261.9	380.5	385.6	423.2	1954.5	2706.9	6791.8
FALSE	High	Master Protein	P14152	Malate dehydrogenase, cytoplasmic OS=Mus musculus OX=10090 GN=Mdh1 PE=1 SV=3	0	96.055	48	17	70	17	17	334	36.5	6.58	187.82	17	0	12464.3	12082.7	9999.6	8193.1	8281.2	3847.2	3922.8	3406.3	3618.3	5217.3	8224.3	8935	7393.7	6832.3	3682.3	2006.6	6718.7	2015.8	2797.7	1744.1	7903.4	4029.3	1969.2	1886.2	1251.5	1511.3	558	622.7	659.2	1666.7	3965.7	8935
FALSE	High	Master Protein	P08226	Apolipoprotein E OS=Mus musculus OX=10090 GN=Apoe PE=1 SV=2	0	96.038	53	17	64	17	17	311	35.8	5.68	196.92	17	0	1502.8	1792.9	2000.2	4325	2779.8	9891.3	5690.1	11332.6	5240.8	7227	4463.4	1751.7	2404.5	2503	13460.3	12880.4	2550.7	14783.1	10559.6	11485.9	952.9	597.9	393.9	995.7	420.1	3885.6	809.4	2071.7	954.8	2308.7	2152.2	1751.7
FALSE	High	Master Protein	P62962	Profilin-1 OS=Mus musculus OX=10090 GN=Pfn1 PE=1 SV=2	0	95.497	71	8	55	8	8	140	14.9	8.28	188.71	8	0	10703.3	9770.4	6323.7	9585.2	6336.5	3357.2	2943.5	2030	2504	4358.4	7098.9	7118	6182.8	4364.4	3045.5	1862.8	4648.6	1780.6	2194.5	2005	6786.8	3258.2	1245.3	2206.7	957.6	1318.8	418.7	371.1	456.2	1392.3	3423	7118
FALSE	High	Master Protein	Q61207	Prosaposin OS=Mus musculus OX=10090 GN=Psap PE=1 SV=2	0	94.286	31	17	46	17	17	557	61.4	5.19	138.89	17	0	3392.9	2590.6	4012.6	4550	5415.4	5528.6	5008.2	5552.8	5302.3	5953.9	4108.1	6687.9	5481.4	5630.6	4596	8948.9	5803.8	8614.4	5684.8	4625	2151.4	863.9	790.2	1047.5	818.4	2171.8	712.4	1015.1	966	1902	1980.9	6687.9
FALSE	High	Master Protein	P01867	Ig gamma-2B chain C region OS=Mus musculus OX=10090 GN=Igh-3 PE=1 SV=3	0	94.281	33	10	82	10	10	404	44.2	6.52	296.3	10	0	3682	3041.6	7971.5	4730.3	4530	6972.5	13844.2	22249.5	16961.8	8503.9	10797.2	2987.1	3937.3	5007.7	15764.6	14315.4	8158.5	21669.5	12155.8	13265.6	2334.7	1014.3	1569.8	1089	684.6	2739	1969.3	4067.4	3090.2	2716.6	5206.3	2987.1
FALSE	High	Master Protein	Q9EQK5	Major vault protein OS=Mus musculus OX=10090 GN=Mvp PE=1 SV=4	0	94.237	33	23	40	23	23	861	95.9	5.59	130.6	23	0	3241.2	2482.9	2312.5	3418.5	2763.3	1482.8	1723.8	1355	1780	1913.6	2216.6	2834.4	1802.6	2247.5	2729.4	1389.1	2114	1741.8	1029.5	539	2055.2	828	455.4	787	417.6	582.5	245.2	247.7	324.3	611.3	1068.8	2834.4
FALSE	High	Master Protein	P80315	T-complex protein 1 subunit delta OS=Mus musculus OX=10090 GN=Cct4 PE=1 SV=3	0	94.122	38	22	51	21	21	539	58	8.02	152.11	22	1	7198.6	6207.3	6217	5542.5	6095	3312.9	2703	2301.3	2623.7	4534.9	5208.5	7999.8	5142.4	5157.9	5053.8	2406.6	5429.3	2903.9	2651.6	2193.8	4564.5	2070	1224.3	1276	921.1	1301.4	384.5	420.7	478	1448.7	2511.5	7999.8
FALSE	High	Master Protein	P02469	Laminin subunit beta-1 OS=Mus musculus OX=10090 GN=Lamb1 PE=1 SV=3	0	94.093	16	29	44	28	28	1786	197	4.94	123.01	29	1	875.8	936.5	1136	1254.9	1737.6	2309.4	7213.5	8242	5468	1955.8	2935.6	651.3	916.7	1044.2	1376.6	2059.1	914.4	8633.3	5077.5	4304.2	555.3	312.3	223.7	288.9	262.6	907.2	1026.1	1506.7	996.2	624.8	1415.5	651.3
FALSE	High	Master Protein	P68254	14-3-3 protein theta OS=Mus musculus OX=10090 GN=Ywhaq PE=1 SV=1	0	93.401	71	17	58	12	12	245	27.8	4.78	164.41	17	3	5289	5217.2	4345.3	4384.5	4379.2	2719.5	2433.8	2161.3	2365.2	5125.3	4289.4	7693.8	6386.7	5365.3	4698	1799.3	6345.8	2320.7	2897.6	3653.4	3353.7	1739.8	855.7	1009.4	661.8	1068.3	346.2	395.1	430.9	1637.3	2068.3	7693.8
FALSE	High	Master Protein	Q8VCT3	Aminopeptidase B OS=Mus musculus OX=10090 GN=Rnpep PE=1 SV=2	0	93.328	38	23	47	23	23	650	72.4	5.35	144.37	23	0	6924.8	6228	4154.8	4934.9	3979.5	3158.6	2251.7	1675	2017.7	3738.9	5315.7	5968.2	4060.1	3359.4	3065.6	1611.7	3758.8	1616.1	1717.2	2211.1	4390.9	2076.9	818.2	1136.1	601.4	1240.8	320.3	306.2	367.6	1194.4	2563.2	5968.2
FALSE	High	Master Protein	P50396	Rab GDP dissociation inhibitor alpha OS=Mus musculus OX=10090 GN=Gdi1 PE=1 SV=3	0	92.62	48	19	50	13	13	447	50.5	5.08	157.07	19	0	2876.7	2743.8	1903.7	3553.1	1632.4	1214.3	956.1	703.5	807.4	3258	1970.8	4317	5107.6	3397	3572.9	1225.6	3358.9	1376.6	1556.4	1906.6	1824.1	915	374.9	818	246.7	477	136	128.6	147.1	1040.8	950.3	4317
FALSE	High	Master Protein	P82198	Transforming growth factor-beta-induced protein ig-h3 OS=Mus musculus OX=10090 GN=Tgfbi PE=1 SV=1	0	92.598	34	19	48	19	19	683	74.6	7.06	161.11	19	0	4986.4	4332.5	10225.6	3360.3	6734.2	6039	8019.9	10792.7	9589.6	5935.7	5434.6	3454.8	3928.4	5878	5473.2	8562.1	3995.7	8515.3	6114.6	6861.4	3161.8	1444.8	2013.7	773.6	1017.7	2372.3	1140.8	1973	1747.1	1896.2	2620.5	3454.8
FALSE	High	Master Protein	Q62009	Periostin OS=Mus musculus OX=10090 GN=Postn PE=1 SV=2	0	92.298	25	19	44	19	19	838	93.1	7.53	133.74	19	0	1324.7	1581.2	1639.7	6482.1	3618.9	10858.9	5891.2	7151.2	5552	3359.2	3990.3	945.3	1250	1268.7	6635.2	8503	1373.5	7995.9	4359.7	3352.2	840	527.3	322.9	1492.3	546.9	4265.7	838	1307.3	1011.5	1073.1	1924.1	945.3
FALSE	High	Master Protein	P29341	Polyadenylate-binding protein 1 OS=Mus musculus OX=10090 GN=Pabpc1 PE=1 SV=2	0	91.543	36	23	48	23	23	636	70.6	9.5	134.67	23	0	6812	6148.6	4993.7	6734.5	4270	2634.2	2579.3	2519	2570.4	6532.1	4472.3	9180.3	7183.7	7701.8	8574.8	3527	7626.9	3491.4	4955.2	5019.9	4319.4	2050.4	983.4	1550.4	645.3	1034.8	366.9	460.5	468.3	2086.7	2156.5	9180.3
FALSE	High	Master Protein	P49182	Heparin cofactor 2 OS=Mus musculus OX=10090 GN=Serpind1 PE=1 SV=1	0	91.238	47	21	59	21	21	478	54.5	7.34	158.86	21	0	5298	7115.4	7054.4	5647.2	8105.2	13130.6	10008	9649.4	12584.9	7568.5	8518.4	4062.5	5629.4	5422.4	6812.9	12599.3	7683.7	10011.6	10993.6	8928.3	3359.4	2372.8	1389.2	1300.1	1224.9	5158.1	1423.6	1764	2292.8	2417.8	4107.5	4062.5
FALSE	High	Master Protein	Q9R1P4	Proteasome subunit alpha type-1 OS=Mus musculus OX=10090 GN=Psma1 PE=1 SV=1	0	91.219	52	15	50	15	15	263	29.5	6.46	150.99	15	0	4954.2	5011.2	4329.5	4595.2	4329.5	2992.4	3536.8	3299.1	3167.6	5809.6	4628.3	6455.7	5859.6	6014.3	4457.6	3777.4	5435.2	4058.2	4582.6	6209.7	3141.4	1671.1	852.6	1057.9	654.3	1175.5	503.1	603.1	577.1	1855.9	2231.7	6455.7
FALSE	High	Master Protein	P26043	Radixin OS=Mus musculus OX=10090 GN=Rdx PE=1 SV=3	0	90.801	39	28	61	13	14	583	68.5	6.2	147.88	28	0	3693.5	3727.4	2835.6	2358.6	2936	1976.7	2079.5	1667.9	1761.9	3608.6	3092.6	4474.9	3659.4	3575.8	3129.2	2200	4553.7	1840	2542.6	3351.3	2342	1243	558.4	543	443.7	776.5	295.8	304.9	321	1152.8	1491.2	4474.9
FALSE	High	Master Protein	P70389	Insulin-like growth factor-binding protein complex acid labile subunit OS=Mus musculus OX=10090 GN=Igfals PE=1 SV=1	0	90.224	35	18	44	18	18	603	66.9	6.6	140.99	18	0	1134.9	1497.3	2512.6	2534.5	2950.5	4770.8	2890.8	3546.3	4200.1	1810.9	2299.9	870.5	1158.5	1507.1	2570.9	3121.2	1720	2725.6	2014.9	2233.9	719.6	499.3	494.8	583.5	445.9	1874.1	411.2	648.3	765.2	578.5	1109	870.5
FALSE	High	Master Protein	P12023	Amyloid-beta A4 protein OS=Mus musculus OX=10090 GN=App PE=1 SV=3	0	90.167	26	17	45	16	16	770	86.7	4.79	138.27	17	1	3719.7	3760.4	5048.6	2322.6	4437.4	3357.9	5955.8	5576.3	4525	2942.8	3717.2	2411.7	3160.1	3109.6	1958.8	3095.6	4058.9	5502.9	3832.7	2600.7	2358.6	1254	994.2	534.7	670.6	1319.1	847.2	1019.4	824.4	940.1	1792.4	2411.7
FALSE	High	Master Protein	P06801	NADP-dependent malic enzyme OS=Mus musculus OX=10090 GN=Me1 PE=1 SV=2	0	90.137	32	18	44	18	18	572	63.9	7.44	132.49	18	0	8537.5	9578.2	8149.2	6052.9	6093	4741.5	2406.4	2072.1	3063.9	4122.3	6304.6	6207.5	4556.8	5135.9	4429.6	2583.2	4838.8	2142.4	1947.8	2104.3	5413.5	3194.1	1604.8	1393.5	920.8	1862.6	342.3	378.8	558.2	1316.9	3040	6207.5
FALSE	High	Master Protein	Q61768	Kinesin-1 heavy chain OS=Mus musculus OX=10090 GN=Kif5b PE=1 SV=3	0	89.993	25	26	46	19	26	963	109.5	6.44	119.51	26	0	4032.9	3203.5	3483.5	5232	3871	2363.4	1896	1677.7	1687.8	3236.1	3135.7	4153.1	3310.3	3932.5	4817.2	1896.4	3478.3	2212.2	2179.8	1744.3	2557.2	1068.3	686	1204.5	585	928.4	269.7	306.7	307.5	1033.8	1512	4153.1
FALSE	High	Master Protein	Q01149	Collagen alpha-2(I) chain OS=Mus musculus OX=10090 GN=Col1a2 PE=1 SV=2	0	89.449	17	18	42	18	18	1372	129.5	9.19	131.96	18	0	1019.4	1618.7	2073.4	1724.9	2361.6	2515.3	7726	11559.6	4413.6	4961.6	3066.8	1856.7	2128.9	2892.5	3056.2	3761.3	2406.8	11659.6	13996.7	9459.4	646.4	539.8	408.3	397.1	356.9	988.1	1099	2113.2	804.1	1585	1478.8	1856.7
FALSE	High	Master Protein	Q8R2S8	CD177 antigen OS=Mus musculus OX=10090 GN=Cd177 PE=2 SV=1	0	88.972	25	20	47	20	20	817	87	5.67	137.91	20	0	1035.7	1167.7	1533.1	2438.5	1382.3	5119.8	23526	7633.7	13738.2	5898.5	4583.5	772.9	977.5	1495.6	7007.4	3502.2	888.2	2642.9	8386	16357.1	656.7	389.4	301.9	561.4	208.9	2011.2	3346.5	1395.5	2502.9	1884.3	2210.1	772.9
FALSE	High	Master Protein	P09470	Angiotensin-converting enzyme OS=Mus musculus OX=10090 GN=Ace PE=1 SV=3	0	88.827	18	23	61	22	23	1312	150.8	6.55	164.03	23	0	2898.8	3495.3	3738.9	5956.1	6609.1	12114.1	3941.7	4931.4	5625.6	7096.5	5109	3399.6	3898.5	3929.3	8496.7	12740.2	4501.9	9633.5	7566.2	7480.5	1838.1	1165.6	736.3	1371.2	998.8	4758.8	560.7	901.5	1024.9	2267	2463.5	3399.6
FALSE	High	Master Protein	Q61879	Myosin-10 OS=Mus musculus OX=10090 GN=Myh10 PE=1 SV=2	0	88.47	11	24	47	4	4	1976	228.9	5.54	128.14	24	0	97.5	105	110.7	104.7	97.9	54.5	106.2	95.7	91.7	334.9	90.8	228.3	280.5	289	725.2	170.1	216.9	563.4	861.7	592.1	61.8	35	21.8	24.1	14.8	21.4	15.1	17.5	16.7	107	43.8	228.3
FALSE	High	Master Protein	P50446	Keratin, type II cytoskeletal 6A OS=Mus musculus OX=10090 GN=Krt6a PE=1 SV=3	0	88.427	25	18	53	1	5	553	59.3	7.94	151.26	18	2	359.7	381.1	1159.8	2836.4	696.8	992.8	1206.4	1794.8	1762.5	565	1006.2	317.5	283.1	2524.3	742.5	659.9	286.1	1000.1	395.6	338.9	228.1	127.1	228.4	653	105.3	390	171.6	328.1	321.1	180.5	485.2	317.5
FALSE	High	Master Protein	P61982	14-3-3 protein gamma OS=Mus musculus OX=10090 GN=Ywhag PE=1 SV=2	0	87.754	53	13	58	7	7	247	28.3	4.89	157.73	13	2	3393.9	3922	2955.4	2977.2	3068.3	2035.2	1994.4	1632.9	1762.5	2068.2	3263.6	2287.6	2324.4	2055.7	1689	867.2	2386.6	1056.1	1455.8	1737.1	2152	1307.9	582	685.4	463.7	799.5	283.7	298.5	321.1	660.7	1573.7	2287.6
FALSE	High	Master Protein	P06745	Glucose-6-phosphate isomerase OS=Mus musculus OX=10090 GN=Gpi PE=1 SV=4	0	87.585	37	20	59	20	20	558	62.7	8.13	176.73	20	0	8562.9	9117.3	8121.3	7692.2	6563.4	4771.5	4961.8	4171	4351	7179.1	7376.8	11047.5	9268.5	7348.3	7916	2992.7	9249.5	3179.6	3788	5327.7	5429.6	3040.4	1599.3	1770.9	991.9	1874.4	705.8	762.5	792.7	2293.4	3557	11047.5
FALSE	High	Master Protein	P41216	Long-chain-fatty-acid--CoA ligase 1 OS=Mus musculus OX=10090 GN=Acsl1 PE=1 SV=2	0	87.457	29	21	44	18	21	699	77.9	7.15	126.32	21	0	11060.4	8213.2	8805.8	2941.1	4983.3	1840.7	1808.8	1562.8	1785.5	5688.4	4791.5	8546.3	8336.8	6127.8	2486.7	2425.6	6077.5	2062.3	2016.3	2742.4	7013.2	2738.9	1734.1	677.1	753.1	723.1	257.3	285.7	325.3	1817.2	2310.4	8546.3
FALSE	High	Master Protein	Q9D154	Leukocyte elastase inhibitor A OS=Mus musculus OX=10090 GN=Serpinb1a PE=1 SV=1	0	87.447	47	17	45	11	17	379	42.5	6.21	134.52	17	0	4712	4490.9	3844.6	2602.3	4783.5	1528.1	2431.7	2208.3	1852	2863.3	3263.2	4848.7	3627.3	4081.9	1652	1383.2	4962.2	1185.3	1621.4	1781.7	2987.8	1497.6	757.1	599.1	722.9	600.3	345.9	403.7	337.4	914.7	1573.5	4848.7
FALSE	High	Master Protein	P29351	Tyrosine-protein phosphatase non-receptor type 6 OS=Mus musculus OX=10090 GN=Ptpn6 PE=1 SV=2	0	87.35	37	21	35	21	21	595	67.5	7.81	117.21	21	0	2232.5	1885.9	1618.9	2469.4	2165.1	1506.8	1933.3	1859.9	1507.8	2703	2237.7	3811.3	2235.9	2085.1	1931.7	1423.4	3127.9	1154.3	1948.5	3326.5	1415.6	628.9	318.8	568.5	327.2	591.9	275	340	274.7	863.5	1079	3811.3
FALSE	High	Master Protein	Q9ESB3	Histidine-rich glycoprotein OS=Mus musculus OX=10090 GN=Hrg PE=1 SV=2	0	87.2	29	15	90	15	15	525	59.1	7.66	245.4	15	0	3369.3	4721.8	6425.2	9746.4	7672.5	15896.6	14791.2	14204.5	21350.2	11630.1	10233.7	3853.7	6971	7572.8	13761	27016.2	8462.3	15791.9	15814.5	19751.2	2136.4	1574.6	1265.3	2243.8	1159.5	6244.7	2104	2596.7	3889.7	3715.3	4934.6	3853.7
FALSE	High	Master Protein	Q60710	Deoxynucleoside triphosphate triphosphohydrolase SAMHD1 OS=Mus musculus OX=10090 GN=Samhd1 PE=1 SV=3	0	87.085	32	21	44	21	21	658	75.8	7.93	120.87	21	0	4848.6	3690.8	2805.1	7646.6	3375.4	2606.2	2492.1	2350	2293.8	1975.9	3714.3	1739.8	1995.9	1743.8	3973.2	1046.7	1832.2	1144.9	1391.5	1497.2	3074.4	1230.8	552.4	1760.4	510.1	1023.8	354.5	429.6	417.9	631.2	1791	1739.8
FALSE	High	Master Protein	Q9JII6	Aldo-keto reductase family 1 member A1 OS=Mus musculus OX=10090 GN=Akr1a1 PE=1 SV=3	0	86.656	60	19	56	18	18	325	36.6	7.39	156.77	19	1	6742.5	7984.4	9610.1	5357.1	5721.1	2945	2909.7	2633.9	2380	3810.6	6062.1	6162.2	5931	5598.8	2634.5	1559.9	4902.6	1539.4	1773.1	1530.6	4275.3	2662.6	1892.5	1233.3	864.6	1156.9	413.9	481.5	433.6	1217.3	2923.1	6162.2
FALSE	High	Master Protein	Q9CWK8	Sorting nexin-2 OS=Mus musculus OX=10090 GN=Snx2 PE=1 SV=2	0	86.561	44	20	34	18	18	519	58.4	5.12	114.25	20	2	3252.3	2853	2189.6	3382	2201.5	1262.4	1144.5	1111.5	1065.9	3418.9	2531.6	4971.5	3745.3	2992.9	3691.7	1364.2	4085.4	1589.4	2084.8	2071.6	2062.2	951.4	431.2	778.6	332.7	495.9	162.8	203.2	194.2	1092.2	1220.7	4971.5
FALSE	High	Master Protein	Q93092	Transaldolase OS=Mus musculus OX=10090 GN=Taldo1 PE=1 SV=2	0	86.499	40	17	46	17	17	337	37.4	7.03	121.67	17	0	7870.7	6029.5	6073.3	3880.2	6290.8	2831	3136.8	2362	2661	4597.5	5547.4	6847.3	5252	5251	2296.8	1968.6	5607.1	1811.6	2498.5	3556.4	4990.7	2010.7	1196	893.3	950.7	1112.1	446.2	431.8	484.8	1468.7	2674.9	6847.3
FALSE	High	Master Protein	Q9QXC1	Fetuin-B OS=Mus musculus OX=10090 GN=Fetub PE=1 SV=1	0	86.092	39	13	76	13	13	388	42.7	6.61	205.18	13	0	2892.4	3931.3	6349.5	4640.4	6202.2	9180.3	12997.1	17341.6	10440.4	6282.3	6715.2	2432.7	3866.4	4748.1	3008.1	6580.3	3749.2	8754.8	13288.8	11747.3	1834	1311	1250.4	1068.3	937.3	3606.3	1848.8	3170.2	1902.1	2006.9	3238	2432.7
FALSE	High	Master Protein	Q05920	Pyruvate carboxylase, mitochondrial OS=Mus musculus OX=10090 GN=Pc PE=1 SV=1	0	85.99	22	24	40	24	24	1178	129.6	6.71	115.31	24	0	6021.6	5827.1	3942.6	1657.1	2632.9	1816.8	1694.9	1728.6	1925	2899.6	3664.3	5029.6	3939.5	3171.7	1683.4	1211.7	4374.6	1283.5	1701.1	981.8	3818.2	1943.2	776.4	381.5	397.9	713.7	241.1	316	350.7	926.3	1766.9	5029.6
FALSE	High	Master Protein	Q3TXS7	26S proteasome non-ATPase regulatory subunit 1 OS=Mus musculus OX=10090 GN=Psmd1 PE=1 SV=1	0	85.862	24	23	43	23	23	953	105.7	5.39	127.36	23	0	5487.8	4903.2	4172.1	4173.4	4002	2619.7	2750.1	2804.6	2865.8	4641	4186.1	5281.1	3782.7	3895	4650.7	2219	5074.4	2402.6	11401	5409.8	3479.7	1635.1	821.6	960.8	604.8	1029.1	391.2	512.7	522.1	1482.6	2018.5	5281.1
FALSE	High	Master Protein	Q9DBB9	Carboxypeptidase N subunit 2 OS=Mus musculus OX=10090 GN=Cpn2 PE=1 SV=2	0	85.668	36	16	52	16	16	547	60.4	5.88	178.34	16	0	1811.7	2902.5	2915.3	4181.2	3844.5	11740.7	11300.1	12933.2	12575.1	6626.9	7033.7	1476.5	2346.9	2074.4	10809.5	11756.3	3608.7	8531.7	9422.5	13053.2	1148.8	967.9	574.1	962.6	581	4612.1	1607.4	2364.3	2291	2117	3391.6	1476.5
FALSE	High	Master Protein	P08121	Collagen alpha-1(III) chain OS=Mus musculus OX=10090 GN=Col3a1 PE=1 SV=4	0	85.606	12	16	41	16	16	1464	138.9	6.52	103.22	16	0	857.5	820.7	1165.9	1128.5	3020.7	2434.6	6320	8926.8	3814.8	2360	2383.3	1107.3	1022.8	1082.5	1107.7	1553.3	1079.8	5130.7	6387.9	4222.6	543.7	273.7	229.6	259.8	456.5	956.4	899	1631.9	695	753.9	1149.2	1107.3
FALSE	High	Master Protein	P51174	Long-chain specific acyl-CoA dehydrogenase, mitochondrial OS=Mus musculus OX=10090 GN=Acadl PE=1 SV=2	0	85.58	36	13	39	13	13	430	47.9	8.31	134.33	13	0	6802.9	5977	5227.3	2146.2	3084.2	1516.2	1720.2	1576.5	1768	2971	2797.9	3162.6	5055.2	4490.9	2238.4	1476.6	2999.1	1390.4	3142.9	1009.4	4313.6	1993.2	1029.4	494.1	466.1	595.6	244.7	288.2	322.1	949.1	1349.1	3162.6
FALSE	High	Master Protein	P80314	T-complex protein 1 subunit beta OS=Mus musculus OX=10090 GN=Cct2 PE=1 SV=4	0	85.414	38	16	32	16	16	535	57.4	6.4	110.34	16	0	3301.8	2896.8	2928.5	2509.8	3133.2	1122.6	1216.2	938.7	1012.2	2237.2	2156	3645.5	2765.1	2920.2	2648.9	1172.3	2721.5	1311.1	1361.4	1089.4	2093.6	966	576.7	577.8	473.5	441	173	171.6	184.4	714.7	1039.6	3645.5
FALSE	High	Master Protein	Q9CPV4	Glyoxalase domain-containing protein 4 OS=Mus musculus OX=10090 GN=Glod4 PE=1 SV=1	0	85.37	56	17	46	17	17	298	33.3	5.47	152.75	17	0	4333.8	4388.9	3432.7	5062.6	3329.7	1531.2	1311.1	1120.8	1429.9	2689.3	3520	4107.7	4625	3099	3225.5	1383.9	3312.2	1360.2	1495.6	1075.1	2748	1463.6	676	1165.5	503.2	601.5	186.5	204.9	260.5	859.1	1697.3	4107.7
FALSE	High	Master Protein	Q9D1A2	Cytosolic non-specific dipeptidase OS=Mus musculus OX=10090 GN=Cndp2 PE=1 SV=1	0	85.258	49	18	43	18	18	475	52.7	5.66	132.92	18	0	5347.1	5385.7	3939.5	7211.8	3970.9	2558.9	2648.2	2638.3	2246.1	3354.5	4414.2	4037	5355.9	4097.4	2311.3	1695.6	2827.3	1733.2	2047.1	2601.8	3390.5	1796	775.8	1660.3	600.1	1005.2	376.7	482.3	409.2	1071.6	2128.5	4037
FALSE	High	Master Protein	A2A8L5	Receptor-type tyrosine-protein phosphatase F OS=Mus musculus OX=10090 GN=Ptprf PE=1 SV=1	0	84.969	15	25	33	21	22	1898	211.4	6.65	97.27	25	3	1445.4	1646.3	1872.3	1613.2	1739.6	1456.6	1022.2	1029.5	1165.8	1751.4	1204.7	1635.5	1800.4	1935.7	1819.4	1752.6	2597.6	1610	1358.6	986.7	916.5	549	368.7	371.4	262.9	572.2	145.4	188.2	212.4	559.5	580.9	1635.5
FALSE	High	Master Protein	P62814	V-type proton ATPase subunit B, brain isoform OS=Mus musculus OX=10090 GN=Atp6v1b2 PE=1 SV=1	0	84.907	42	17	38	17	17	511	56.5	5.81	128.77	17	0	3627.1	3789.8	3198.6	3657.8	3898.8	2176.5	1689.3	1573.8	1777.3	2486.7	3149.6	3275.4	2772.6	2630.4	2590	1404.4	2775.7	1731.5	1540.4	1712.8	2299.9	1263.8	629.9	842.1	589.2	855	240.3	287.7	323.8	794.4	1518.7	3275.4
FALSE	High	Master Protein	Q8BWT1	3-ketoacyl-CoA thiolase, mitochondrial OS=Mus musculus OX=10090 GN=Acaa2 PE=1 SV=3	0	84.826	58	16	36	16	16	397	41.8	8.09	129.72	16	0	7441.6	6391.2	5552.3	2675.3	4541.3	1896.7	1377.2	1024	1764.7	5328.8	3990.7	9118.4	7864.4	6740.1	2721	2008	8271.3	1563.5	1921.3	1218	4718.6	2131.3	1093.4	615.9	686.3	745.1	195.9	187.2	321.5	1702.3	1924.3	9118.4
FALSE	High	Master Protein	Q9JJZ2	Tubulin alpha-8 chain OS=Mus musculus OX=10090 GN=Tuba8 PE=1 SV=1	0	84.288	38	13	45	3	3	449	50	5.1	160.1	13	0	703.2	496.3	451.9	2599.3	373.2	297.1	319.2	235.2	346.3	57.6	483.2	25	74	27.8	132.3	24.8	27	28.4	47.5	49.2	445.9	165.5	89	598.4	56.4	116.7	45.4	43	63.1	18.4	233	25
FALSE	High	Master Protein	Q07797	Galectin-3-binding protein OS=Mus musculus OX=10090 GN=Lgals3bp PE=1 SV=1	0	84.251	30	14	40	14	14	577	64.5	5.14	130.3	14	0	2633.7	2829.3	4247.3	2315.6	3810.1	2749.8	14316	5437.4	5938.4	4348.7	3764.3	3291.6	4452.4	4187.3	2391.8	2671.5	4396.1	2625.7	5250.8	7721.4	1670	943.5	836.4	533.1	575.8	1080.2	2036.4	994	1081.9	1389.2	1815.1	3291.6
FALSE	High	Master Protein	P60843	Eukaryotic initiation factor 4A-I OS=Mus musculus OX=10090 GN=Eif4a1 PE=1 SV=1	0	84.187	45	17	50	7	7	406	46.1	5.48	147.74	17	0	3952	3235.9	2528.3	2858.1	2267	1190.1	1186.7	1074.9	1227.9	2982.3	2571	4946.4	2782.3	2664.7	3080.1	1142.3	3501.7	1480.8	1470.5	1464.8	2505.9	1079.1	497.9	658	342.6	467.5	168.8	196.5	223.7	952.7	1239.7	4946.4
FALSE	High	Master Protein	P10630	Eukaryotic initiation factor 4A-II OS=Mus musculus OX=10090 GN=Eif4a2 PE=1 SV=2	0	83.572	49	18	40	8	8	407	46.4	5.48	126.37	18	11	6801.8	6022.3	4682.4	5321	3580.5	1744.5	1723.8	1282.2	1652.7	3886	4224.1	6860.5	4453.7	3907.2	4462.3	1112.4	4510.2	1296.5	1503.3	1350.1	4312.9	2008.3	922.1	1225	541.1	685.3	245.2	234.4	301.1	1241.4	2036.8	6860.5
FALSE	High	Master Protein	Q91YR9	Prostaglandin reductase 1 OS=Mus musculus OX=10090 GN=Ptgr1 PE=1 SV=2	0	83.462	47	14	50	14	14	329	35.5	7.96	151.67	14	0	4439	4370.6	2856.9	1413.4	1254.6	1170.5	729	724.3	958.9	3134.4	3180.5	6087.2	5069.3	2949.6	2770.5	1116.1	3251.5	1163.8	1121.7	945	2814.7	1457.5	562.6	325.4	189.6	459.8	103.7	132.4	174.7	1001.3	1533.6	6087.2
FALSE	High	Master Protein	Q9JMH6	Thioredoxin reductase 1, cytoplasmic OS=Mus musculus OX=10090 GN=Txnrd1 PE=1 SV=3	0	83.216	27	15	41	14	14	613	67	7.44	129.96	15	1	4259.4	3632.3	3485.5	3387.2	3792.2	2471.5	1933.3	1358.8	1742.2	3162.6	3572.4	5269	4026.2	3892.5	2706.9	1549.6	3976.2	1454.1	1766.1	1722.8	2700.8	1211.3	686.4	779.8	573.1	970.9	275	248.4	317.4	1010.3	1722.6	5269
FALSE	High	Master Protein	P10923	Osteopontin OS=Mus musculus OX=10090 GN=Spp1 PE=1 SV=1	0	83.08	50	11	41	11	11	294	32.4	4.53	138.19	11	0	1213.7	1220.5	1325.9	3809	1819.7	6153.5	1913.6	2298.6	1678	3585.5	2317.6	835.3	1179.2	1106.2	7648	8649.7	1117.4	6381.5	5278	5433.1	769.6	407	261.1	876.9	275	2417.3	272.2	420.2	305.7	1145.4	1117.5	835.3
FALSE	High	Master Protein	P11589	Major urinary protein 2 OS=Mus musculus OX=10090 GN=Mup2 PE=1 SV=1	0	83.062	68	13	45	1	1	180	20.7	5.11	163.94	13	0	487.8	517.3	768.8	225.4	679.6	1002.2	175	163	163	901.5	637.7	1408	2811.8	1761.8	485.8	746.7	975.6	228.3	247.4	223.1	309.3	172.5	151.4	51.9	102.7	393.7	24.9	29.8	29.7	288	307.5	1408
FALSE	High	Master Protein	E9Q557	Desmoplakin OS=Mus musculus OX=10090 GN=Dsp PE=1 SV=1	0	82.961	9	31	44	31	31	2883	332.7	6.8	109.32	31	0	1520.9	2473.9	3813.1	4579.6	3481.9	2484.8	6878.9	9442.7	5300.6	2510.5	2784.2	1298.2	1756.8	5682.9	3332.6	5565.7	1796.2	4536.3	3320.4	1116.9	964.4	825	750.9	1054.3	526.2	976.1	978.5	1726.2	965.7	802	1342.5	1298.2
FALSE	High	Master Protein	P56399	Ubiquitin carboxyl-terminal hydrolase 5 OS=Mus musculus OX=10090 GN=Usp5 PE=1 SV=1	0	82.769	26	20	41	20	20	858	95.8	5.01	110.61	20	0	3822.8	3375.7	2831.5	3312.1	2267.7	1618.8	1367.3	1212.2	1399.7	2497.1	2543	3373.9	3050.9	2793.7	4689.1	1671.5	2903.7	2598.1	2079.2	1758.6	2424	1125.7	557.6	762.5	342.7	635.9	194.5	221.6	255	797.7	1226.2	3373.9
FALSE	High	Master Protein	P80317	T-complex protein 1 subunit zeta OS=Mus musculus OX=10090 GN=Cct6a PE=1 SV=3	0	82.761	38	20	40	16	20	531	58	7.08	131.17	20	0	8339.6	7042.2	6682.2	5351.4	7047.1	2729.4	2575.1	2202.3	2658.8	4776.3	5428.4	8032.1	5027.5	5178.3	5188.9	2579.6	5507.3	2783.3	2681.7	2415.3	5288	2348.4	1315.9	1232	1065	1072.2	366.3	402.6	484.4	1525.8	2617.5	8032.1
FALSE	High	Master Protein	Q9R069	Basal cell adhesion molecule OS=Mus musculus OX=10090 GN=Bcam PE=1 SV=1	0	82.73	30	17	43	17	17	622	67.6	6.25	137.21	17	0	2905.6	3560.4	4555	2583.6	5477.6	3427.4	3212	2683.1	3095.7	3033.3	3325.7	2516.5	4314.2	4140.7	2109.3	2381	3791.4	4625.9	3550.4	3217.7	1842.4	1187.3	897	594.8	827.8	1346.4	456.9	490.5	564	969	1603.6	2516.5
FALSE	High	Master Protein	P11588	Major urinary protein 1 OS=Mus musculus OX=10090 GN=Mup1 PE=1 SV=1	0	82.482	75	14	46	1	1	180	20.6	5.1	162.87	14	16	4555.5	4276.5	6371.4	1438.2	3323.7	3885.4	1491.1	1699	1825.6	3162.3	5621.8	5845.6	11393.9	9484.8	1340.1	1313.9	3493.9	716.7	1986.3	729.9	2888.6	1426.1	1254.7	331.1	502.3	1526.3	212.1	310.6	332.6	1010.2	2710.8	5845.6
FALSE	High	Master Protein	Q99KI0	Aconitate hydratase, mitochondrial OS=Mus musculus OX=10090 GN=Aco2 PE=1 SV=1	0	82.379	27	22	39	22	22	780	85.4	7.93	117.75	22	0	9357.4	6680.5	6372.4	2075.4	3786.9	1516.7	1113.6	1129	1550.1	5122.5	4154.6	8967.5	6861.4	5491	1916.7	1762.8	6607	1425.7	2391.6	2058.9	5933.4	2227.8	1254.9	477.8	572.3	595.8	158.4	206.4	282.4	1636.4	2003.3	8967.5
FALSE	High	Master Protein	P32921	Tryptophan--tRNA ligase, cytoplasmic OS=Mus musculus OX=10090 GN=Wars1 PE=1 SV=2	0	82.04	38	19	47	19	19	481	54.3	6.89	133.72	19	0	5549.6	5332.6	4531.1	5642.9	3078.9	1613.9	1477	1185.4	1487.5	4429.7	3960.9	7667.6	5338.3	4480.3	5959.5	1670.1	5380.5	2026.1	2114.9	2048.7	3518.9	1778.3	892.3	1299.1	465.3	634	210.1	216.7	271	1415.1	1909.9	7667.6
FALSE	High	Master Protein	P18760	Cofilin-1 OS=Mus musculus OX=10090 GN=Cfl1 PE=1 SV=3	0	81.919	66	16	49	14	14	166	18.5	8.09	162.73	16	3	10370.2	9236	6143.4	18722.6	6059.2	3199.1	4554.8	3967.5	4544.8	7286.5	8133.9	10249	10451.2	6874	7185.6	2486.1	7563.2	3655.9	3739.1	2818.6	6575.6	3080	1209.8	4310.3	915.7	1256.7	647.9	725.3	828	2327.7	3922.1	10249
FALSE	High	Master Protein	Q06770	Corticosteroid-binding globulin OS=Mus musculus OX=10090 GN=Serpina6 PE=1 SV=1	0	81.813	37	13	50	13	13	397	44.7	5.24	145.94	13	0	3114.4	5266.3	5080.6	9247.7	6918.1	11679.1	4096.4	4416.1	4214.9	4354.3	5313	2319.1	3776.5	4452.6	7321.7	13369.4	4695.2	4686.2	3108	2363.2	1974.8	1756.2	1000.5	2129	1045.5	4587.9	582.7	807.3	767.9	1391	2561.9	2319.1
FALSE	High	Master Protein	P49935	Pro-cathepsin H OS=Mus musculus OX=10090 GN=Ctsh PE=1 SV=2	0	81.587	45	12	27	12	12	333	37.1	8.4	101	12	0	1474.1	1649.3	1945.9	1558.1	1930.2	933.7	820.4	565.6	894.7	3210.5	1244.1	3370.2	4510.5	6109.8	1853.6	3024.1	4498.3	2429.3	2356.7	1885.1	934.7	550	383.2	358.7	291.7	366.8	116.7	103.4	163	1025.6	599.9	3370.2
FALSE	High	Master Protein	O35685	Nuclear migration protein nudC OS=Mus musculus OX=10090 GN=Nudc PE=1 SV=1	0	81.457	48	17	39	17	17	332	38.3	5.26	122.07	17	0	5780.8	4296	4624	3789.9	4845	2500.1	2213.8	2074.3	2809.8	2150.5	3949.9	3101.6	3049.6	3531.7	1984	1254.8	2666.8	1410.2	1696.2	1275.5	3665.5	1432.6	910.6	872.5	732.2	982.1	314.9	379.2	511.9	687	1904.6	3101.6
FALSE	High	Master Protein	P29788	Vitronectin OS=Mus musculus OX=10090 GN=Vtn PE=1 SV=2	0	81.452	26	12	68	11	12	478	54.8	5.88	205.97	12	0	2340.9	3196	3567.8	4160.8	3706.2	6041.5	11141.2	12600.6	10890.5	8725.5	5207.9	3548	5655.3	4489.3	9964.1	11902.2	7629.8	18489.9	11178.8	12984.5	1484.3	1065.8	702.6	957.9	560.1	2373.3	1584.8	2303.5	1984.1	2787.4	2511.2	3548
FALSE	High	Master Protein	Q64737	Trifunctional purine biosynthetic protein adenosine-3 OS=Mus musculus OX=10090 GN=Gart PE=1 SV=3	0	81.433	29	26	38	26	26	1010	107.4	6.68	103.44	26	0	3841.1	3626.3	2910.7	3672.6	2565.4	1662	1666.8	1404.2	1452.4	3076.2	3001.3	4803.1	3275	2638.6	3549.5	1081.8	3496	1395.5	1742.3	2205.6	2435.6	1209.3	573.2	845.5	387.7	652.9	237.1	256.7	264.6	982.7	1447.2	4803.1
FALSE	High	Master Protein	B5X0G2	Major urinary protein 17 OS=Mus musculus OX=10090 GN=Mup17 PE=2 SV=2	0	81.376	74	12	44	1	2	180	20.6	5.02	169.33	12	0	287.5	244.4	339.7	76.4	242.2	393.3	404.9	466.1	406.7	412.3	434.9	576.3	869.6	1001.7	311.4	435.8	404.1	300.6	445.9	288.1	182.3	81.5	66.9	17.6	36.6	154.5	57.6	85.2	74.1	131.7	209.7	576.3
FALSE	High	Master Protein	O08808	Protein diaphanous homolog 1 OS=Mus musculus OX=10090 GN=Diaph1 PE=1 SV=1	0	81.356	17	25	39	25	25	1255	139.3	5.57	97.89	25	0	2203.7	2188.8	1729.1	1754.9	1848.8	1130.8	1192.3	1167.9	1262.4	3606.5	1744.3	5215	3568.7	3495	3323.2	1709.5	4356.5	1920.1	2529.3	2934.2	1397.3	729.9	340.5	404	279.4	444.2	169.6	213.5	230	1152.1	841.1	5215
FALSE	High	Master Protein	P11859	Angiotensinogen OS=Mus musculus OX=10090 GN=Agt PE=1 SV=1	0	81.311	33	13	45	12	13	477	52	5.44	140.95	13	0	2373	3014.3	2647.7	2877.3	4168.7	5979.2	3572	3633.3	4812.7	3013.6	3684.4	1794.5	3033.7	2623.1	3383.1	3887.6	2384.6	4167.6	4370.2	4405.8	1504.7	1005.2	521.4	662.4	630	2348.8	508.1	664.2	876.8	962.7	1776.6	1794.5
FALSE	High	Master Protein	P99029	Peroxiredoxin-5, mitochondrial OS=Mus musculus OX=10090 GN=Prdx5 PE=1 SV=2	0	81.112	60	11	43	11	11	210	21.9	8.85	167.71	11	0	7105.4	6746.5	5292.8	4731.1	3943.1	1496.6	2072.5	1511.4	1507.8	2705.2	4413.8	4412	4362.6	4073.8	2011.6	1066.4	3352.9	1082.8	1211.9	1182.8	4505.4	2249.8	1042.3	1089.2	595.9	587.9	294.8	276.3	274.7	864.2	2128.3	4412
FALSE	High	Master Protein	Q99KQ4	Nicotinamide phosphoribosyltransferase OS=Mus musculus OX=10090 GN=Nampt PE=1 SV=1	0	81.084	43	20	41	20	20	491	55.4	7.15	128.29	20	0	7101.4	6292.2	5378.1	5040.9	3855.1	2192.5	1842.6	1620.8	1921.7	4511.7	4416.9	7637.1	5467.3	4768.5	4700.8	1725.6	5003.2	1487.7	1843	2361.8	4502.9	2098.3	1059.1	1160.5	582.6	861.3	262.1	296.3	350.1	1441.3	2129.8	7637.1
FALSE	High	Master Protein	P45700	Mannosyl-oligosaccharide 1,2-alpha-mannosidase IA OS=Mus musculus OX=10090 GN=Man1a1 PE=1 SV=1	0	81.083	31	20	41	19	20	655	73.2	6.81	129.1	20	0	4608.5	4977	5288.2	4187.3	6779.2	6647.4	5432.1	5457.6	6320.5	7585.4	5317.6	5897.6	7292.4	6712.3	7039.7	11134.4	7770.8	8430.9	7235.6	5655	2922.2	1659.7	1041.4	964	1024.5	2611.3	772.7	997.7	1151.5	2423.2	2564.1	5897.6
FALSE	High	Master Protein	P80313	T-complex protein 1 subunit eta OS=Mus musculus OX=10090 GN=Cct7 PE=1 SV=1	0	80.86	36	19	39	19	19	544	59.6	7.84	122.64	19	0	5642.8	4872.9	4820.6	3568.8	4387.1	3089.6	1838.4	1509.2	1790.5	5987.7	4023.9	10795.1	7333.4	7196.5	5472.3	2930.7	7257.9	3059	2354.6	1939.9	3578	1625	949.3	821.6	663	1213.7	261.5	275.9	326.2	1912.8	1940.3	10795.1
FALSE	High	Master Protein	P10605	Cathepsin B OS=Mus musculus OX=10090 GN=Ctsb PE=1 SV=2	0	80.813	43	12	49	12	12	339	37.3	5.91	162.37	12	0	4576.4	3779	5023.7	1940.8	4586.9	4701.3	2639.1	3290.9	2721.9	1852.5	3708.9	1838.1	2729.5	2585.5	991.8	2105.1	2382.5	1516.1	1615.8	1443.3	2901.8	1260.2	989.3	446.8	693.2	1846.8	375.4	601.6	495.9	591.8	1788.4	1838.1
FALSE	High	Master Protein	Q9WUB3	Glycogen phosphorylase, muscle form OS=Mus musculus OX=10090 GN=Pygm PE=1 SV=3	0	80.787	27	24	39	15	15	842	97.2	7.11	119.16	24	0	2631.2	9524.8	3152.4	2383.8	1513.3	1424.8	2710.1	1317.8	2186.2	423.2	2152.9	259.1	246.6	318.4	366.1	203.7	202.4	202.4	357.8	360.7	1668.4	3176.3	620.8	548.8	228.7	559.7	385.5	240.9	398.3	135.2	1038.1	259.1
FALSE	High	Master Protein	Q9CQV8	14-3-3 protein beta/alpha OS=Mus musculus OX=10090 GN=Ywhab PE=1 SV=3	0	80.716	54	12	58	6	6	246	28.1	4.83	180.96	12	0	1518.3	1542.8	1166.9	913	913.8	568.2	499.8	465	705.9	1461.6	1093.1	2106.9	2043	1690.7	937.1	469.3	1920.6	498.8	664.6	855.9	962.7	514.5	229.8	210.2	138.1	223.2	71.1	85	128.6	466.9	527.1	2106.9
FALSE	High	Master Protein	Q07113	Cation-independent mannose-6-phosphate receptor OS=Mus musculus OX=10090 GN=Igf2r PE=1 SV=1	0	80.633	9	26	43	26	26	2483	273.6	5.71	108.97	26	0	3338.4	3412.2	4204.6	2770	5230.8	3123.7	1712.5	1632.3	1929.3	2391.9	2720.5	2526.4	2906	2971.6	1802.6	2575.9	3304.2	2172.5	1509.6	1389.8	2116.8	1137.9	828	637.7	790.5	1227.1	243.6	298.4	351.5	764.1	1311.8	2526.4
FALSE	High	Master Protein	Q61789	Laminin subunit alpha-3 OS=Mus musculus OX=10090 GN=Lama3 PE=1 SV=4	0	80.276	6	22	36	22	22	3330	366	6.65	97.45	22	0	1524.2	1723.7	1667.1	2880.3	1838.9	4284.8	3098.1	3171.6	3243.4	1687.2	2216.1	734.6	854.2	1067.8	2780.8	4153.3	1063.5	4593.2	2667.7	1338.3	966.5	574.8	328.3	663.1	277.9	1683.2	440.7	579.8	590.9	539	1068.6	734.6
FALSE	High	Master Protein	P45376	Aldo-keto reductase family 1 member B1 OS=Mus musculus OX=10090 GN=Akr1b1 PE=1 SV=3	0	79.841	49	17	54	16	16	316	35.7	7.18	159.48	17	1	7852.6	7548.7	6997	10685.9	6716.3	2957	2935.7	3072.6	3649.6	6082.5	7070.4	11504.1	8900	6821.7	4843.4	2493.4	7867	2847.1	3616.8	2349.8	4979.2	2517.3	1377.9	2460.1	1015	1161.6	417.6	561.7	664.9	1943.1	3409.3	11504.1
FALSE	High	Master Protein	P60122	RuvB-like 1 OS=Mus musculus OX=10090 GN=Ruvbl1 PE=1 SV=1	0	79.841	39	15	30	15	15	456	50.2	6.42	98.09	15	0	2835.7	1914.1	2480.6	1340.9	3002.2	1013.9	820.4	781.1	982	1530.1	1602.1	2226.6	2115.7	3184.7	1320	851.1	1849.1	1168.1	934.4	941.6	1798.1	638.3	488.5	308.7	453.7	398.3	116.7	142.8	178.9	488.8	772.5	2226.6
FALSE	High	Master Protein	P17751	Triosephosphate isomerase OS=Mus musculus OX=10090 GN=Tpi1 PE=1 SV=5	0	79.753	66	13	48	13	13	249	26.7	7.3	168.3	13	0	11714.2	11411.6	11168.1	7091.9	6910.8	4488.4	3078.5	2343.4	3139.1	4296.4	7517.8	7481.9	7529.7	6278.8	2536.7	1329.9	5503.7	1284.4	1590.7	1954	7427.8	3805.5	2199.3	1632.7	1044.4	1763.2	437.9	428.4	571.9	1372.5	3625	7481.9
FALSE	High	Master Protein	P30416	Peptidyl-prolyl cis-trans isomerase FKBP4 OS=Mus musculus OX=10090 GN=Fkbp4 PE=1 SV=5	0	79.629	44	20	45	20	20	458	51.5	5.72	134.55	20	0	8989.2	7593.1	6660.3	2969.3	5096.4	2349.1	1390.5	1200.2	1651.1	4798.5	5221	8391.1	6309.2	5884.5	2834.6	1756.2	5900.7	1719.4	1734	2017.7	5699.9	2532.1	1311.6	683.6	770.2	922.8	197.8	219.4	300.8	1532.9	2517.5	8391.1
FALSE	High	Master Protein	P97371	Proteasome activator complex subunit 1 OS=Mus musculus OX=10090 GN=Psme1 PE=1 SV=2	0	79.522	55	14	45	14	14	249	28.7	5.97	136.52	14	0	7486.2	6619.4	6915.2	4631.2	4749.7	3779.5	3347.7	3721.4	2948.6	3753	5769.3	4700.4	4157.8	3989.7	3638.9	1889.8	4060.2	2148.4	2766.9	3089.2	4746.9	2207.4	1361.8	1066.2	717.8	1484.7	476.2	680.3	537.2	1198.9	2781.9	4700.4
FALSE	High	Master Protein	Q64514	Tripeptidyl-peptidase 2 OS=Mus musculus OX=10090 GN=Tpp2 PE=1 SV=3	0	79.433	19	25	38	25	25	1262	139.8	6.58	92.16	25	0	3260.5	3048.2	2532.4	1999.4	2913.5	1694.9	1588.8	1403.1	1639.5	3072.1	2590.9	3707.1	2810.5	3237	3464	2284.7	3176.6	1834	2491.6	2868.7	2067.4	1016.5	498.7	460.3	440.3	665.8	226	256.5	298.7	981.4	1249.3	3707.1
FALSE	High	Master Protein	P61979	Heterogeneous nuclear ribonucleoprotein K OS=Mus musculus OX=10090 GN=Hnrnpk PE=1 SV=1	0	79.425	39	15	36	15	15	463	50.9	5.54	120.06	15	0	3890	2954.9	2966.1	2535.4	2596.5	1075.5	1325.2	1201.3	1765.8	2191.5	2185.4	2914.6	2499.2	2922.7	2004.6	1086.1	2520.4	1116.4	1274.1	1203.7	2466.6	985.4	584.1	583.7	392.4	422.5	188.5	219.6	321.7	700.1	1053.8	2914.6
FALSE	High	Master Protein	Q9WV80	Sorting nexin-1 OS=Mus musculus OX=10090 GN=Snx1 PE=1 SV=1	0	79.105	32	17	34	15	15	522	58.9	5.22	104.68	17	0	2131.9	1535.3	1252.2	2586.7	1790.6	1011.6	852	758.2	797	2574.1	1906.5	3900.3	2393.1	2328.3	2607.3	1485.4	3249.5	2156.2	1883.5	2087.7	1351.8	512	246.6	595.5	270.6	397.4	121.2	138.6	145.2	822.3	919.3	3900.3
FALSE	High	Master Protein	Q9CZD3	Glycine--tRNA ligase OS=Mus musculus OX=10090 GN=Gars1 PE=1 SV=1	0	79.103	28	19	40	19	19	729	81.8	6.65	108.23	19	0	4161.9	3450.3	3018.4	3931.5	2731.5	1709.9	1673.1	1561.2	1810.2	3421.8	3149	5048.9	3588.5	3704.8	3911.9	1582.5	4062.6	1837.4	2109.3	2342.5	2639	1150.6	594.4	905.1	412.8	671.7	238	285.4	329.8	1093.1	1518.4	5048.9
FALSE	High	Master Protein	Q9WTI7	Unconventional myosin-Ic OS=Mus musculus OX=10090 GN=Myo1c PE=1 SV=2	0	79.073	24	25	42	24	25	1063	121.9	9.35	114.16	25	0	2805.3	3034.1	2708.1	6941.2	2889	2499.5	2890	2385.6	3181.4	3163.2	3214.1	2485.1	2187.5	3203.5	6370.6	1630.7	2132.1	2757.5	3231	3742.1	1778.8	1011.8	533.3	1598	436.6	981.9	411.1	436.1	579.6	1010.5	1549.8	2485.1
FALSE	High	Master Protein	P26638	Serine--tRNA ligase, cytoplasmic OS=Mus musculus OX=10090 GN=Sars1 PE=1 SV=3	0	78.753	34	17	43	17	17	512	58.4	6.3	122.32	17	0	7714.9	6995.7	5130.8	6334	3858.4	2409.9	2192.7	2078.1	2052.3	3964.6	5477.9	7015.4	4235.3	3220.6	6838.2	2588.3	5102.7	2189.8	2421	1998.4	4891.9	2332.9	1010.4	1458.2	583.1	946.7	311.9	379.9	373.9	1266.5	2641.4	7015.4
FALSE	High	Master Protein	P33267	Cytochrome P450 2F2 OS=Mus musculus OX=10090 GN=Cyp2f2 PE=1 SV=1	0	78.708	40	18	39	17	18	491	55.9	7.9	132.61	18	0	9609.9	9225.9	8685.4	3442.8	4418.9	3044.3	2139.9	1883.9	2388.8	2875.8	4972.9	3841.1	3096.3	2498.1	3070.7	2682.5	3515.1	1866.7	2054	1001	6093.5	3076.6	1710.4	792.6	667.8	1195.9	304.4	344.4	435.2	918.7	2397.9	3841.1
FALSE	High	Master Protein	P55065	Phospholipid transfer protein OS=Mus musculus OX=10090 GN=Pltp PE=1 SV=1	0	78.519	31	13	43	13	13	493	54.4	6.62	139.62	13	0	3003.2	4112.7	3522.6	6018.2	5673.4	8515.9	3795.5	3877.3	4614.5	3691.3	4328.6	2274.8	4607.4	6185	6600.6	7257.7	3266.8	4923.1	3660.1	3218.2	1904.3	1371.5	693.7	1385.5	857.4	3345.3	539.9	708.8	840.7	1179.2	2087.2	2274.8
FALSE	High	Master Protein	Q8BGQ7	Alanine--tRNA ligase, cytoplasmic OS=Mus musculus OX=10090 GN=Aars1 PE=1 SV=1	0	78.492	21	22	39	22	22	968	106.8	5.67	99.89	22	0	3332.5	3209.2	2361.3	4837.6	2297.4	1892.4	1607.8	1501	1505.1	3505.7	2945.9	4941.4	3294	2697.3	5269.4	1531.4	3645.5	1869.3	2458	3016.7	2113.1	1070.2	465	1113.7	347.2	743.4	228.7	274.4	274.2	1119.9	1420.5	4941.4
FALSE	High	Master Protein	P51855	Glutathione synthetase OS=Mus musculus OX=10090 GN=Gss PE=1 SV=1	0	78.033	42	21	46	21	21	474	52.2	5.8	131.99	21	0	4107.3	4716.1	3971	3372.4	3540.1	1885	1527.6	1457.8	1789.9	3772	3358.6	6394.6	5636.4	4308.1	2615.3	1608.8	4740.1	1610.9	3375	1922.9	2604.4	1572.7	782	776.4	535	740.5	217.3	266.5	326.1	1205	1619.5	6394.6
FALSE	High	Master Protein	Q9QUM9	Proteasome subunit alpha type-6 OS=Mus musculus OX=10090 GN=Psma6 PE=1 SV=1	0	77.93	52	12	37	12	12	246	27.4	6.76	135.8	12	0	3748.9	4095.3	3471.8	3855	4027.8	2583.8	2737.5	2563.3	3252.2	6389.3	3493.2	7003.9	6241	5518	5504.1	3929.2	6317.3	4016	4498.1	7041	2377.1	1365.7	683.7	887.5	608.7	1015	389.4	468.6	592.5	2041.1	1684.4	7003.9
FALSE	High	Master Protein	P68510	14-3-3 protein eta OS=Mus musculus OX=10090 GN=Ywhah PE=1 SV=2	0	77.823	54	14	45	9	9	246	28.2	4.89	138.98	14	2	2540	2457.4	1802.7	1964.2	2827.5	1509.3	1123.4	1015.8	1169.7	2534.6	2078.6	3037.5	3213.4	2980.6	1980.3	1097.1	3211.9	1036.3	1396.4	1895.5	1610.6	819.5	355	452.2	427.3	592.9	159.8	185.7	213.1	809.7	1002.3	3037.5
FALSE	High	Master Protein	P37040	NADPH--cytochrome P450 reductase OS=Mus musculus OX=10090 GN=Por PE=1 SV=2	0	77.677	32	22	39	22	22	678	77	5.53	96.42	22	0	5662.7	4943.7	5057.2	2470.3	4055.6	2352.7	1661.2	1542.1	1942.5	2930.3	3358.6	4032.5	3198.4	2587.1	3207.7	2386.1	3598.6	1519.6	1903.8	1031.6	3590.6	1648.6	995.9	568.7	612.9	924.2	236.3	281.9	353.9	936.1	1619.5	4032.5
FALSE	High	Master Protein	P08003	Protein disulfide-isomerase A4 OS=Mus musculus OX=10090 GN=Pdia4 PE=1 SV=3	0	77.501	31	18	36	18	18	638	71.9	5.31	108.76	18	0	5637.6	3678.8	3398.7	2443.3	3014.7	1723.1	1267.5	1042.6	1450.2	2339.3	3082.4	3786.9	2591.7	3070.4	1544	1129.9	3246.1	976.9	1578.1	1331.8	3574.7	1226.8	669.3	562.5	455.6	676.9	180.3	190.6	264.2	747.3	1486.3	3786.9
FALSE	High	Master Protein	Q6Q899	Antiviral innate immune response receptor RIG-I OS=Mus musculus OX=10090 GN=Ddx58 PE=1 SV=2	0	77.299	24	23	38	23	23	926	105.9	6.65	108.78	23	0	3664.2	3447.6	2826.4	5483	2760.6	1987.9	2112.5	1652.5	1811.9	4164	3213.5	4866.7	4152.6	3461.5	6506.6	1737.2	3530.2	2494.7	3286.9	3285.5	2323.4	1149.7	556.6	1262.3	417.2	780.9	300.5	302.1	330.1	1330.2	1549.5	4866.7
FALSE	High	Master Protein	Q9DBF1	Alpha-aminoadipic semialdehyde dehydrogenase OS=Mus musculus OX=10090 GN=Aldh7a1 PE=1 SV=4	0	77.199	32	15	37	15	15	539	58.8	7.47	118.37	15	0	5500.7	5141.6	4172.6	3398.5	2425.1	1601.2	1420.1	1043.2	1384.8	2948.5	3872.7	5021.2	4505.7	3165.1	2080.3	1208.8	4502.1	1269.8	1212.6	1359.6	3487.9	1714.6	821.7	782.4	366.5	629	202	190.7	252.3	941.9	1867.4	5021.2
FALSE	High	Master Protein	Q9EQH2	Endoplasmic reticulum aminopeptidase 1 OS=Mus musculus OX=10090 GN=Erap1 PE=1 SV=2	0	77.065	24	21	38	21	21	930	106.5	6.2	114.39	21	0	3389.5	3227.8	2851.8	2654.4	4337.5	2854.2	2232	2129.5	2474.9	3993.4	2970	4479.2	4090.5	3918.7	2639.6	3566.4	4528.6	2804.8	3285.5	3636.2	2149.2	1076.4	561.6	611.1	655.5	1121.2	317.5	389.3	450.9	1275.7	1432.1	4479.2
FALSE	High	Master Protein	P37804	Transgelin OS=Mus musculus OX=10090 GN=Tagln PE=1 SV=3	0	76.977	65	14	42	13	13	201	22.6	8.81	126.22	14	2	14134.6	6100.3	7691.7	3361.6	4082.7	1729.5	3181.1	2758.1	2086.3	4170.5	4778.6	3956.2	3008.6	5151.4	3185.3	1167.2	5451.8	3395.8	5003.4	2378.8	8962.5	2034.3	1514.7	773.9	617	679.4	452.5	504.2	380.1	1332.3	2304.2	3956.2
FALSE	High	Master Protein	P35700	Peroxiredoxin-1 OS=Mus musculus OX=10090 GN=Prdx1 PE=1 SV=1	0	76.951	53	12	60	10	12	199	22.2	8.12	175.17	12	0	17290	14374.3	13069.8	9284.2	8894	5417.6	3531.9	2796.4	3367.4	9933.2	11058.9	17609.8	12680.9	12150.3	9267.3	3875.2	15175.9	3556	3330.2	2998.1	10963.3	4793.5	2573.8	2137.4	1344.1	2128.2	502.4	511.2	613.5	3173.2	5332.5	17609.8
FALSE	High	Master Protein	P33434	72 kDa type IV collagenase OS=Mus musculus OX=10090 GN=Mmp2 PE=1 SV=1	0	76.865	34	20	36	20	20	662	74.1	5.53	108.34	20	0	1816.6	1680.5	2228.2	6708.8	2104.9	6019.4	10906.4	9958	7318.9	2853	4256.6	764.4	964.7	1025.4	4570.8	4445.3	1191.2	8603.2	6357.8	4550.9	1151.9	560.4	438.8	1544.5	318.1	2364.6	1551.4	1820.4	1333.4	911.4	2052.5	764.4
FALSE	High	Master Protein	O55029	Coatomer subunit beta' OS=Mus musculus OX=10090 GN=Copb2 PE=1 SV=2	0	76.824	26	22	31	22	22	905	102.4	5.3	91.16	22	0	2559	2228	2228.2	2465.9	2111.5	1651.6	1619	1481.9	1387	2658	2074.5	2791.4	2183.9	2171.6	3510.7	1343.1	2525	1697.9	1873	2774.4	1622.6	743	438.8	567.7	319.1	648.8	230.3	270.9	252.7	849.1	1000.3	2791.4
FALSE	High	Master Protein	Q6IRU2	Tropomyosin alpha-4 chain OS=Mus musculus OX=10090 GN=Tpm4 PE=1 SV=3	0	76.743	59	17	40	13	13	248	28.5	4.68	126.62	17	4	4242.2	3980.5	2954.4	7748.3	4054.9	3576.6	6598.4	6319.2	4420.8	4841.1	5358.3	4387	3981.7	3669.7	7290.3	2751.1	4999.5	4981.7	6744.3	6231.2	2689.9	1327.4	581.8	1783.8	612.8	1405	938.6	1155.2	805.4	1546.5	2583.7	4387
FALSE	High	Master Protein	Q9WUM4	Coronin-1C OS=Mus musculus OX=10090 GN=Coro1c PE=1 SV=2	0	76.541	35	18	37	15	17	474	53.1	7.08	99.64	18	1	5372.6	4837.2	3625.7	4157.3	4547.9	3583.5	3902.4	3299.1	2915.2	2666.7	4489.5	3446.7	2646.3	2280.2	2454.9	1844.5	3060.3	2166.5	2230.9	2447.5	3406.7	1613.1	714	957.1	687.3	1407.7	555.1	603.1	531.1	851.9	2164.8	3446.7
FALSE	High	Master Protein	P54071	Isocitrate dehydrogenase [NADP], mitochondrial OS=Mus musculus OX=10090 GN=Idh2 PE=1 SV=3	0	76.396	42	20	43	19	19	452	50.9	8.69	122.65	20	0	10633	9197.4	6854.3	2143.2	4098.6	1737.4	1316.7	1006.5	1656.5	2150.5	5092.8	4084.3	2925.4	2192.8	1099.8	673.7	3229.8	647.8	584.3	569.4	6742.2	3067.1	1349.8	493.4	619.4	682.5	187.3	184	301.8	687	2455.7	4084.3
FALSE	High	Master Protein	P02468	Laminin subunit gamma-1 OS=Mus musculus OX=10090 GN=Lamc1 PE=1 SV=2	0	76.308	13	20	35	20	20	1607	177.2	5.21	107.03	20	0	946.1	858.2	1190.3	2131.9	1854.1	2195.3	6746	7317.5	5165.6	3092.1	2653.1	1125.9	1289.2	1507.9	3561.7	3186.1	1417.8	13115.4	7490	6477.9	599.9	286.2	234.4	490.8	280.2	862.4	959.6	1337.7	941.1	987.8	1279.3	1125.9
FALSE	High	Master Protein	Q80YC5	Coagulation factor XII OS=Mus musculus OX=10090 GN=F12 PE=1 SV=2	0	76.269	24	14	36	14	14	597	65.7	6.84	125.11	14	0	1308.5	1760.8	1569.6	2225.3	1838.2	4209.4	4348.1	4394.8	5119.5	4048.5	2893.3	1667	2597.4	2523.5	4177.1	7238	3346.9	6731.3	6371.1	6601	829.7	587.2	309.1	512.3	277.8	1653.6	618.5	803.4	932.7	1293.3	1395.1	1667
FALSE	High	Master Protein	Q8K354	Carbonyl reductase [NADPH] 3 OS=Mus musculus OX=10090 GN=Cbr3 PE=1 SV=1	0	75.671	55	13	33	12	12	277	30.9	6.57	110.4	13	0	4449.4	4506.8	4387.4	1208.8	2325.9	1278.9	677.7	710.6	1036.3	1188.3	3423.8	2353.8	1830.4	1522.6	1031.1	414.6	1417.5	476.4	507.4	376.7	2821.3	1502.9	864	278.3	351.5	502.4	96.4	129.9	188.8	379.6	1650.9	2353.8
FALSE	High	Master Protein	Q64437	All-trans-retinol dehydrogenase [NAD(+)] ADH7 OS=Mus musculus OX=10090 GN=Adh7 PE=2 SV=2	0	75.666	43	14	49	13	13	374	39.9	7.85	152.49	14	1	11611.7	10996.3	9231.3	4886.2	10705	3516.8	2806.4	2455	2818	3937.3	6224.5	6207.3	8484.8	7759.8	2698.5	2489.1	6296	2698	1636.1	1089.2	7362.8	3667	1817.9	1124.9	1617.8	1381.5	399.2	448.8	513.4	1257.8	3001.4	6207.3
FALSE	High	Master Protein	Q07968	Coagulation factor XIII B chain OS=Mus musculus OX=10090 GN=F13b PE=1 SV=2	0	75.661	30	18	33	18	18	669	76.1	6.92	107.72	18	0	1233.4	1811.2	1644.3	3735.6	1889.8	7085.2	8145.7	8083.9	6923.1	3673.8	4352.8	952.4	1684.2	1569.9	5614.5	12459.9	2430.4	10295.9	5644.3	3146.6	782.1	604	323.8	860	285.6	2783.3	1158.7	1477.8	1261.3	1173.6	2098.9	952.4
FALSE	High	Master Protein	Q3UZ39	Leucine-rich repeat flightless-interacting protein 1 OS=Mus musculus OX=10090 GN=Lrrfip1 PE=1 SV=2	0	75.614	34	22	38	22	22	729	79.2	4.82	106.81	22	0	2101.1	1820.5	1563	2052	1901.7	1374.4	1171.2	1176.6	980.9	3554.5	2066.4	5166	3661.2	3573.3	3061.8	1519	4533.5	1616.1	2222.5	3543.5	1332.3	607.1	307.8	472.4	287.4	539.9	166.6	215.1	178.7	1135.5	996.4	5166
FALSE	High	Master Protein	Q91YI0	Argininosuccinate lyase OS=Mus musculus OX=10090 GN=Asl PE=1 SV=1	0	75.601	36	17	35	17	17	464	51.7	6.96	114.16	17	0	3827.9	4124.7	3377.9	3301.6	3585.8	2109.3	1921.3	1944.7	2520	3545.1	3279.8	4555.1	4017.4	3843.6	3102.5	1872.3	4371.2	2630.8	4508.6	2943	2427.2	1375.5	665.2	760.1	541.9	828.6	273.3	355.5	459.1	1132.5	1581.5	4555.1
FALSE	High	Master Protein	O35643	AP-1 complex subunit beta-1 OS=Mus musculus OX=10090 GN=Ap1b1 PE=1 SV=2	0	75.46	22	21	37	8	8	943	103.9	5.17	105.92	21	0	2623.8	2481.4	2076.4	2678.8	1897.8	1335.4	1237.3	1056.3	1255.3	1183.9	1973.1	1346.3	1198.5	1225.4	1367.3	587.6	1251.9	534.1	691.9	917.6	1663.7	827.5	408.9	616.7	286.8	524.6	176	193.1	228.7	378.2	951.4	1346.3
FALSE	High	Master Protein	Q04857	Collagen alpha-1(VI) chain OS=Mus musculus OX=10090 GN=Col6a1 PE=1 SV=1	0	75.403	20	19	41	19	19	1025	108.4	5.36	120.54	19	0	1444.9	1398.9	1494.5	2705.7	2844	2725.3	4878.1	5684.6	5094.2	4986.6	2293.3	2654.9	3536.6	3281.1	6441.6	12958.5	3388.1	22540.4	7836	4639.7	916.2	466.5	294.3	622.9	429.8	1070.6	693.9	1039.2	928.1	1593	1105.8	2654.9
FALSE	High	Master Protein	Q8VDM4	26S proteasome non-ATPase regulatory subunit 2 OS=Mus musculus OX=10090 GN=Psmd2 PE=1 SV=1	0	75.246	25	21	35	21	21	908	100.1	5.17	114.69	21	0	4024.2	3541.2	3108.3	3939.7	3616.2	2408.7	2228.5	1873	2191.7	3303.4	3206.8	3943.1	2710.5	2689.2	3420.5	1376.6	3190.9	1540.3	2212	3845.9	2551.7	1180.9	612.1	907	546.5	946.2	317	342.4	399.3	1055.3	1546.3	3943.1
FALSE	High	Master Protein	O09164	Extracellular superoxide dismutase [Cu-Zn] OS=Mus musculus OX=10090 GN=Sod3 PE=1 SV=1	0	75.196	51	11	43	11	11	251	27.4	6.84	158.67	11	0	2180.6	2662	4107.6	3504.1	4496.3	6257.4	5150.2	5423.2	7289.8	3982.4	3744.4	2227.5	4430	3490.9	3482.7	7411.7	3534.8	8580.8	5482.8	3925.9	1382.7	887.7	808.9	806.7	679.5	2458.1	732.6	991.4	1328.1	1272.2	1805.5	2227.5
FALSE	High	Master Protein	Q61490	CD166 antigen OS=Mus musculus OX=10090 GN=Alcam PE=1 SV=3	0	75.191	24	13	33	13	13	583	65.1	6.15	102.84	13	0	3037.6	3522.3	5206	1554.6	5145.4	1622.6	970.1	997.8	1169.1	3019.8	2576.2	3871.5	7274.4	6192.3	1203.1	1508.8	5574.4	1349.9	2709.6	1044.3	1926.1	1174.6	1025.2	357.9	777.6	637.4	138	182.4	213	964.7	1242.2	3871.5
FALSE	High	Master Protein	Q9R111	Guanine deaminase OS=Mus musculus OX=10090 GN=Gda PE=1 SV=1	0	75.12	40	17	37	17	17	454	51	5.53	113.68	17	0	3807.4	4505.3	3619.6	2311.7	5107.7	2802.2	2840.8	2822.6	2485.4	3161	4087.2	3429.7	3310.3	3341.5	1774.5	1778.1	3572.9	1262	2395.8	5056.4	2414.2	1502.4	712.8	532.2	771.9	1100.8	404.1	516	452.8	1009.8	1970.8	3429.7
FALSE	High	Master Protein	Q9DBG3	AP-2 complex subunit beta OS=Mus musculus OX=10090 GN=Ap2b1 PE=1 SV=1	0	74.369	24	22	37	9	9	937	104.5	5.38	101.43	22	13	3741.8	3003.2	2754.3	3516.7	3562	3137	2639.1	2636.1	3047.4	3814.9	3242.1	4013.8	3270.6	3373.3	4442.2	2741.6	3980.4	2876.3	3374.3	4443.4	2372.6	1001.5	542.4	809.6	538.3	1232.3	375.4	481.9	555.2	1218.7	1563.3	4013.8
FALSE	High	Master Protein	Q3V0K9	Plastin-1 OS=Mus musculus OX=10090 GN=Pls1 PE=1 SV=1	0	74.206	28	18	41	14	14	630	70.4	5.38	128.46	18	0	4815.3	4191.3	2755.8	5420.5	2170.4	1494	1401.1	1034.4	1193.3	1117.2	3023.7	1694.8	1353.5	1129.9	1470.6	413.9	1179.8	498.8	509.5	456.1	3053.3	1397.7	542.7	1247.9	328	586.9	199.3	189.1	217.4	356.9	1458	1694.8
FALSE	High	Master Protein	Q9ERK4	Exportin-2 OS=Mus musculus OX=10090 GN=Cse1l PE=1 SV=1	0	74.177	26	24	39	24	24	971	110.4	5.77	101.58	24	0	3745.1	3408	2611.6	5640.3	2636.9	2415.5	2197.6	1801.3	1852.5	3134.7	3119.7	3845.2	2739.2	2752	5109.5	1502.9	3166.5	1890	2187.5	2650.6	2374.7	1136.5	514.3	1298.5	398.5	948.9	312.6	329.3	337.5	1001.4	1504.3	3845.2
FALSE	High	Master Protein	P19001	Keratin, type I cytoskeletal 19 OS=Mus musculus OX=10090 GN=Krt19 PE=1 SV=1	0	74.148	44	20	51	11	11	403	44.5	5.39	139.05	20	9	3978.7	4385.6	8413.8	7207.1	5028.9	5822.3	9441.3	10189.3	7184.4	9297.1	5148.2	4607.6	6016.4	18323	12476.5	19797.9	6299.9	15642.9	11704.4	5241.3	2522.8	1462.5	1656.9	1659.2	760	2287.2	1343	1862.7	1308.9	2970	2482.4	4607.6
FALSE	High	Master Protein	Q8CG14	Complement C1s-A subcomponent OS=Mus musculus OX=10090 GN=C1sa PE=2 SV=2	0	74.144	26	16	32	10	16	688	76.8	5.08	115.32	16	0	1458.6	1786.6	2096.7	3846.3	3048.5	8340.5	7299.3	10611.1	9373.4	1939.9	4435	598	748.1	723.3	2772.9	3958.4	1018.1	8736.7	3057.7	1934.3	924.9	595.8	412.9	885.5	460.7	3276.4	1038.3	1939.8	1707.7	619.7	2138.5	598
FALSE	High	Master Protein	P46460	Vesicle-fusing ATPase OS=Mus musculus OX=10090 GN=Nsf PE=1 SV=2	0	73.925	27	20	31	19	20	744	82.6	6.95	90.13	20	0	2798.1	2012.4	1653.9	3001.1	1949.4	1292.9	935	855	1007.2	2776.6	2033.6	4191.5	2560.8	2717.8	3220.8	1825.6	3468.5	1595.4	1724.9	1801.4	1774.2	671.1	325.7	690.9	294.6	507.9	133	156.3	183.5	887	980.6	4191.5
FALSE	High	Master Protein	Q99LC5	Electron transfer flavoprotein subunit alpha, mitochondrial OS=Mus musculus OX=10090 GN=Etfa PE=1 SV=2	0	73.735	54	15	32	15	15	333	35	8.38	105.21	15	0	4921.3	4571.8	5586.8	1360.4	2763.9	1763.6	1181.7	1367	1584.6	2163.4	2699.1	3897.6	3517.6	2285.9	895.9	894.2	2894.9	706.4	1044.1	692.7	3120.5	1524.6	1100.2	313.2	417.7	692.8	168.1	249.9	288.7	691.1	1301.5	3897.6
FALSE	High	Master Protein	P28843	Dipeptidyl peptidase 4 OS=Mus musculus OX=10090 GN=Dpp4 PE=1 SV=3	0	73.709	26	20	36	20	20	760	87.4	6.42	107.57	20	0	3966.7	6008.2	4398.1	2720	6824.2	2264.8	1711.8	1514.2	2329.5	2259.5	3237.3	3001.8	3838.6	4575	1185.4	1504.4	3593.7	1144	1098.7	699.8	2515.2	2003.6	866.1	626.2	1031.3	889.7	243.5	276.8	424.4	721.8	1561	3001.8
FALSE	High	Master Protein	P40936	Indolethylamine N-methyltransferase OS=Mus musculus OX=10090 GN=Inmt PE=1 SV=1	0	73.678	38	9	31	9	9	264	29.4	6.39	134.43	9	0	1576.4	1419.6	2870.1	32686.3	1296.9	715.1	3054.6	1742.3	1434.8	3640.3	4065.4	2045.5	3440.1	1667.1	12336.7	635.8	1123.1	2355.2	2434.2	2422.8	999.6	473.4	565.2	7525	196	280.9	434.5	318.5	261.4	1162.9	1960.3	2045.5
FALSE	High	Master Protein	Q07076	Annexin A7 OS=Mus musculus OX=10090 GN=Anxa7 PE=1 SV=2	0	73.585	35	17	36	17	17	463	49.9	6.18	103.36	17	0	6023.5	5798.9	3892.8	7419	3122.6	1384.1	1890.4	1321.1	1563.2	2359.6	3885	4029	3331.8	2610.8	1953.2	983.9	2916.4	1119	1477.5	927.1	3819.4	1933.8	766.6	1708	471.9	543.7	268.9	241.5	284.8	753.8	1873.3	4029
FALSE	High	Master Protein	Q9EQ20	Methylmalonate-semialdehyde dehydrogenase [acylating], mitochondrial OS=Mus musculus OX=10090 GN=Aldh6a1 PE=1 SV=1	0	73.471	31	16	36	16	16	535	57.9	8.07	112.02	16	0	3468.5	3399.3	2706.1	1102	1179.2	668	807.8	667.4	790.9	3347.6	1998.4	6253.2	4704.7	3662.3	1388.8	1272.3	4900.3	1250.8	1389.4	1088.1	2199.3	1133.6	532.9	253.7	178.2	262.4	114.9	122	144.1	1069.4	963.6	6253.2
FALSE	High	Master Protein	Q9WV54	Acid ceramidase OS=Mus musculus OX=10090 GN=Asah1 PE=1 SV=1	0	73.128	38	15	55	15	15	394	44.6	8.46	144.84	15	0	4215.5	4257.6	4317.3	2644.9	4956.2	2160.5	1987.4	1654.2	2573.2	1884.5	3267.2	2657.2	2556	3406	1068.5	1683.2	3320.8	1615.2	1211.9	758	2673	1419.8	850.2	608.9	749	848.7	282.7	302.4	468.8	602	1575.4	2657.2
FALSE	High	Master Protein	P55284	Cadherin-5 OS=Mus musculus OX=10090 GN=Cdh5 PE=1 SV=2	0	73.038	18	13	36	13	13	784	87.8	5.3	114.51	13	0	1150.5	1456.5	1791	3465.8	2910.2	7184.8	2753	3678.2	3757.1	2224.4	2748.9	1563.7	1506.7	1197.6	4409.9	3594.9	1598.7	4108.2	2277.7	1895.1	729.5	485.7	352.7	797.9	439.8	2822.4	391.6	672.4	684.5	710.6	1325.5	1563.7
FALSE	High	Master Protein	P23116	Eukaryotic translation initiation factor 3 subunit A OS=Mus musculus OX=10090 GN=Eif3a PE=1 SV=5	0	73.014	17	28	46	28	28	1344	161.8	6.77	106.62	28	0	2592.1	2266.7	2216	2809.5	2699.1	1622.8	2173.7	1985.1	1987	4506.4	2493.4	5179.7	3768.6	4184	5274	2640.2	4201.7	2795.4	4292.6	5522	1643.6	755.9	436.4	646.8	407.9	637.5	309.2	362.9	362	1439.6	1202.3	5179.7
FALSE	High	Master Protein	Q99JY9	Actin-related protein 3 OS=Mus musculus OX=10090 GN=Actr3 PE=1 SV=3	0	72.783	42	16	48	13	16	418	47.3	5.88	143.84	16	0	6247.4	5884.1	4977.5	5295	5953.3	4089.5	4176.5	4480.6	3487.6	6071.3	6257.7	7638.7	5524.1	5329.4	3962.4	3003.7	6947.1	3040	4236.7	7418.4	3961.4	1962.2	980.2	1219	899.7	1606.5	594.1	819.1	635.4	1939.5	3017.4	7638.7
FALSE	High	Master Protein	Q78PY7	Staphylococcal nuclease domain-containing protein 1 OS=Mus musculus OX=10090 GN=Snd1 PE=1 SV=1	0	72.543	23	21	38	21	21	910	102	7.43	106.25	21	0	4679.7	4049.5	3319	2264.8	2979	1529.2	1446.8	1603.9	1583	2591.9	3009.4	4183.9	2527.4	3000.2	1960.2	1481.8	3238.6	1701.3	1365.6	1154.3	2967.3	1350.4	653.6	521.4	450.2	600.7	205.8	293.2	288.4	828	1451.1	4183.9
FALSE	High	Master Protein	Q61508	Extracellular matrix protein 1 OS=Mus musculus OX=10090 GN=Ecm1 PE=1 SV=2	0	72.417	31	15	37	15	15	559	62.8	6.8	116.26	15	0	1010.1	1127.5	1502.1	4405.8	1928.2	4686	6739.7	6170.9	5683.8	3269.9	2909.2	1022.5	1573.7	1656.4	4352.4	7118.3	1594.8	9164.8	7550.1	4389.9	640.5	376	295.8	1014.3	291.4	1840.8	958.7	1128.1	1035.5	1044.6	1402.8	1022.5
FALSE	High	Master Protein	P43277	Histone H1.3 OS=Mus musculus OX=10090 GN=H1-3 PE=1 SV=2	0	72.368	44	16	55	2	2	221	22.1	11.03	164.41	16	14	9188.2	9267.8	8318.8	7238.8	11299.3	3529.5	7785.1	5893	5441.1	9992.6	6829	16644	14265.2	16885.3	4825.2	6455.5	13401.7	4060	4971.9	2916.9	5826.1	3090.6	1638.2	1666.5	1707.6	1386.5	1107.4	1077.3	991.3	3192.2	3292.9	16644
FALSE	High	Master Protein	Q3TW96	UDP-N-acetylhexosamine pyrophosphorylase-like protein 1 OS=Mus musculus OX=10090 GN=Uap1l1 PE=1 SV=1	0	72.218	41	21	45	19	19	507	56.6	5.43	117.21	21	2	3869.8	4021	2775.1	6143.7	2370.2	1861.9	1491.1	1311.2	1534.1	4267.6	3466.7	7004.6	6335.2	3818.2	4347.7	2000	4760.8	1987.3	2725.7	2339.1	2453.8	1340.9	546.5	1414.4	358.2	731.4	212.1	239.7	279.5	1363.3	1671.6	7004.6
FALSE	High	Master Protein	Q9Z2W0	Aspartyl aminopeptidase OS=Mus musculus OX=10090 GN=Dnpep PE=1 SV=2	0	72.153	34	15	31	15	15	473	52.2	7.25	99.24	15	0	3949.6	3612	3314.4	2916.8	3824.6	2950.1	1908	1805.2	2162.1	2865.2	3140.9	3718.9	2968.1	4290.9	3644	1700	3930.1	1711.7	2075	2338	2504.4	1204.5	652.7	671.5	578	1158.9	271.4	330	393.9	915.3	1514.5	3718.9
FALSE	High	Master Protein	O08788	Dynactin subunit 1 OS=Mus musculus OX=10090 GN=Dctn1 PE=1 SV=3	0	72.048	13	17	34	17	17	1281	141.6	5.9	100.89	17	0	2120.9	1799.8	1788.5	1930.3	1652.9	974.2	1059.4	949.6	1081.3	2498.3	1661	3115.7	2305	2507.9	3407.9	1203.7	2416.4	1580.7	1866.7	2212	1344.8	600.2	352.2	444.4	249.8	382.7	150.7	173.6	197	798.1	800.9	3115.7
FALSE	High	Master Protein	P29621	Serine protease inhibitor A3C OS=Mus musculus OX=10090 GN=Serpina3c PE=2 SV=1	0	71.617	29	13	65	9	9	417	46.7	7.88	218.34	13	0	612.9	763.2	904.4	694.1	1126.2	1832.1	2428.9	2005.9	1803.1	1210.8	1147.3	538.5	922.4	884.1	832.8	2249.6	790.8	1918.4	1930.3	1547.8	388.6	254.5	178.1	159.8	170.2	719.7	345.5	366.7	328.5	386.8	553.2	538.5
FALSE	High	Master Protein	Q8CIE6	Coatomer subunit alpha OS=Mus musculus OX=10090 GN=Copa PE=1 SV=2	0	71.565	18	22	32	22	22	1224	138.3	7.65	90.38	22	0	3351.8	3220.6	4194.9	2973.7	3990.7	2566	2691.1	2354.4	2673.1	3078.7	3007.7	3125.6	2889.8	4258.3	3901.6	2026.3	2966.7	2310.4	2444.7	3275.8	2125.3	1074	826.1	684.6	603.1	1008	382.8	430.4	487	983.5	1450.3	3125.6
FALSE	High	Master Protein	Q8C1A5	Thimet oligopeptidase OS=Mus musculus OX=10090 GN=Thop1 PE=1 SV=1	0	71.509	30	20	34	19	19	687	78	6.06	89.68	20	1	3340.4	2798.1	2611.6	2776.1	2683.2	1658.7	1528.3	1312.3	1587.4	1798.4	2452.1	2298.3	1959.4	2558.6	1794.2	889.8	1900.9	1030.3	1247.5	1503.1	2118.1	933.1	514.3	639.1	405.5	651.6	217.4	239.9	289.2	574.5	1182.4	2298.3
FALSE	High	Master Protein	Q9DBJ1	Phosphoglycerate mutase 1 OS=Mus musculus OX=10090 GN=Pgam1 PE=1 SV=3	0	71.508	44	10	34	6	6	254	28.8	7.18	115.19	10	5	2865.7	3558.6	3622.1	3589.6	2734.2	2078	2131.5	1801.9	2033.1	1971.2	3013.7	2154.6	2800.8	2311.2	1692.2	873.7	1759.4	1196.5	1922.7	1716.9	1817.1	1186.7	713.3	826.4	413.2	816.3	303.2	329.4	370.4	629.7	1453.2	2154.6
FALSE	High	Master Protein	O70570	Polymeric immunoglobulin receptor OS=Mus musculus OX=10090 GN=Pigr PE=1 SV=1	0	71.348	25	16	38	16	16	771	84.9	5.4	126.89	16	0	4642	4647.1	5772.7	2959.8	5429.9	3218.2	4920.3	3188.6	4915.3	3246.5	3949.9	3745.7	4854.4	4552.2	1776.4	2466.4	4773.8	1863.3	1961.1	1584.3	2943.4	1549.7	1136.8	681.4	820.6	1264.2	699.9	582.9	895.5	1037.1	1904.6	3745.7
FALSE	High	Master Protein	Q8BMS1	Trifunctional enzyme subunit alpha, mitochondrial OS=Mus musculus OX=10090 GN=Hadha PE=1 SV=1	0	71.308	28	21	38	20	21	763	82.6	9.14	98.06	21	0	6277.9	4376.6	4222.4	3177	3241	1341.3	1195.1	1126.3	1480.9	2473.6	2931.4	3778.3	3354.7	2422.2	1978.4	1743.8	3151.2	1475.6	1128.7	954.8	3980.7	1459.5	831.5	731.4	489.8	526.9	170	205.9	269.8	790.2	1413.5	3778.3
FALSE	High	Master Protein	P07310	Creatine kinase M-type OS=Mus musculus OX=10090 GN=Ckm PE=1 SV=1	0	71.148	45	15	35	14	14	381	43	7.06	112.32	15	1	5662.3	22887.7	13034.2	1164.1	1690	1316.3	3659.8	1596.2	1900.8	3244	3361.7	2301.9	1503.2	8177.8	762.2	578.8	897.6	755.5	1606.8	1118.4	3590.4	7632.5	2566.8	268	255.4	517.1	520.6	291.8	346.3	1036.3	1621	2301.9
FALSE	High	Master Protein	Q9R0P5	Destrin OS=Mus musculus OX=10090 GN=Dstn PE=1 SV=3	0	71.116	64	13	59	12	12	165	18.5	7.97	175.03	13	0	6740.3	5915	4499.1	6996.4	3908.7	2347.6	2184.2	1757.6	1952.9	4912.1	4122.4	7747.6	7760.5	4973.4	4027	1556.9	5315.5	2209.6	1991.8	1504.3	4273.9	1972.5	886	1610.7	590.7	922.2	310.7	321.3	355.8	1569.2	1987.8	7747.6
FALSE	High	Master Protein	P97447	Four and a half LIM domains protein 1 OS=Mus musculus OX=10090 GN=Fhl1 PE=1 SV=3	0	71.105	58	14	35	14	14	280	31.9	8.37	129.18	14	0	2937.8	2757.9	1850.9	10329.7	1973.2	1884.5	1964.2	1096.8	1078.6	2638.2	2956.3	2368.6	2850.6	1820.5	7330.1	698.5	1952.5	1667.7	1525.7	1182.1	1862.8	919.7	364.5	2378.1	298.2	740.3	279.4	200.5	196.5	842.8	1425.5	2368.6
FALSE	High	Master Protein	Q8BFZ3	Beta-actin-like protein 2 OS=Mus musculus OX=10090 GN=Actbl2 PE=1 SV=1	0	71.098	26	10	69	1	1	376	42	5.49	195.18	10	0										37.3		29	35.2	44.1	197.3	17.5	31.9	38.8	76.9	61.4										11.9		29
FALSE	High	Master Protein	P70168	Importin subunit beta-1 OS=Mus musculus OX=10090 GN=Kpnb1 PE=1 SV=2	0	70.918	24	17	26	17	17	876	97.1	4.78	82.94	17	0	1591.1	1513.2	1216.2	2023.3	1535.2	1124.9	1092.5	864.3	940.2	1751.1	1462.3	2348.2	1889.8	1929.1	2056	960.6	1790.7	870.9	1178.3	1539.4	1008.9	504.6	239.5	465.8	232	441.9	155.4	158	171.3	559.4	705.1	2348.2
FALSE	High	Master Protein	Q8R1F1	Protein Niban 2 OS=Mus musculus OX=10090 GN=Niban2 PE=1 SV=2	0	70.763	27	20	40	20	20	749	84.8	5.94	116.13	20	0	5064.8	4811.4	3681.1	6376.1	5077.3	2670.9	2376.9	2381.2	2064.4	3838.7	4039.3	4592.6	3890.1	3828	4785.4	2955.5	3670.9	2732.5	3091.9	3125	3211.5	1604.5	724.9	1467.9	767.3	1049.2	338.1	435.3	376.1	1226.3	1947.7	4592.6
FALSE	High	Master Protein	P21550	Beta-enolase OS=Mus musculus OX=10090 GN=Eno3 PE=1 SV=3	0	70.729	38	15	30	11	12	434	47	7.18	111.4	15	0	2656.3	9312.8	5701.6	1198	2816.2	1481.6	1477.7	1210	1445.8	2467.3	2002.9	2329	1480.3	4090.1	843.1	893.4	1301.4	760.6	2068	738.3	1684.3	3105.6	1122.8	275.8	425.6	582	210.2	221.2	263.4	788.2	965.8	2329
FALSE	High	Master Protein	P58771	Tropomyosin alpha-1 chain OS=Mus musculus OX=10090 GN=Tpm1 PE=1 SV=1	0	70.473	40	16	43	6	6	284	32.7	4.74	103.32	16	9	4662	4320.3	2823.9	9221.2	4903.2	2733.7	5129.1	4432	3626	6826.3	4354.3	7309	6302.6	7486.3	16662.9	3907.3	7990.6	7014.7	7459.3	5377.1	2956.1	1440.7	556.1	2122.9	741	1073.9	729.6	810.2	660.6	2180.7	2099.6	7309
FALSE	High	Master Protein	Q8CG16	Complement C1r-A subcomponent OS=Mus musculus OX=10090 GN=C1ra PE=1 SV=1	0	70.287	24	17	52	4	16	707	80	5.66	161.32	17	1	2354.4	2811	3045.8	3049.3	3318.4	5599.9	7483.5	10331	8838.8	4139.6	4517.1	2349.4	2314.3	2398.5	5572.4	7176.7	2719.2	19403.9	7024.6	4292	1492.9	937.4	599.8	702	501.5	2199.8	1064.5	1888.6	1610.3	1322.4	2178.1	2349.4
FALSE	High	Master Protein	Q8VCC9	Spondin-1 OS=Mus musculus OX=10090 GN=Spon1 PE=1 SV=1	0	70.132	23	17	32	17	17	807	90.8	6.02	93.05	17	0	1328.7	1428.3	1410.7	4629.1	1711.2	2947.8	6447.2	5132.7	4921.3	1588.3	2623.9	704.9	1043.1	942.9	2101.4	4885.4	2186.5	4480.3	2841.7	2397.2	842.5	476.3	277.8	1065.7	258.6	1158	917.1	938.3	896.6	507.4	1265.2	704.9
FALSE	High	Master Protein	Q3UZZ6	Sulfotransferase 1 family member D1 OS=Mus musculus OX=10090 GN=Sult1d1 PE=1 SV=1	0	69.855	47	16	43	13	16	295	35.1	5.76	122.23	16	0	5312.2	5052.5	4593.1	1642.8	3914	1255.5	1079.1	963.3	1148.3	2670.5	3022.9	4886.7	5137.1	5857.6	1040.9	959.1	3709.5	993.2	873.6	594.4	3368.4	1684.9	904.5	378.2	591.5	493.2	153.5	176.1	209.2	853.1	1457.6	4886.7
FALSE	High	Master Protein	P01898	H-2 class I histocompatibility antigen, Q10 alpha chain OS=Mus musculus OX=10090 GN=H2-Q10 PE=1 SV=3	0	69.747	37	10	37	5	6	325	37.2	5.25	119.61	10	4	1908.6	3883.9	2931	4593.9	3848.5	14146.3	6066.2	8228.3	6953.3	5953.6	5610	2170.9	4008.1	2971.6	7649.9	18195	4266.5	10045.2	5405.2	6554.3	1210.2	1295.2	577.2	1057.6	581.6	5557.1	862.9	1504.2	1266.8	1901.9	2705.1	2170.9
FALSE	High	Master Protein	P21107	Tropomyosin alpha-3 chain OS=Mus musculus OX=10090 GN=Tpm3 PE=1 SV=3	0	69.729	47	16	46	8	8	285	33	4.72	120.41	16	0	1918.8	1855.3	1664.1	3809.9	2024.8	1218.8	1881.9	1820.5	1444.1	1525.1	1848	1841.6	1457.9	1479.3	2890.7	620.4	1801.9	971.7	1109.8	1315	1216.7	618.7	327.7	877.1	306	478.8	267.7	332.8	263.1	487.2	891.1	1841.6
FALSE	High	Master Protein	P15864	Histone H1.2 OS=Mus musculus OX=10090 GN=H1-2 PE=1 SV=2	0	69.511	43	14	50	3	3	212	21.3	11	157.93	14	0	1076.4	584.7	393.5	1330	1304.9	615.5	1562.1	1085.3	986.9	1224.6	1063.9	2510.2	1268.1	1143.8	771.1	912.4	1715.1	545.3	429.8	534.1	682.5	195	77.5	306.2	197.2	241.8	222.2	198.4	179.8	391.2	513	2510.2
FALSE	High	Master Protein	Q60676	Serine/threonine-protein phosphatase 5 OS=Mus musculus OX=10090 GN=Ppp5c PE=1 SV=3	0	69.427	31	17	32	17	17	499	56.8	6.2	96.17	17	0	3236.2	2861.4	2511.1	3062.7	2285.5	1189.1	1138.9	1024	1024.2	2743.1	2371.7	4000.2	3333.6	2819.8	2582.1	1401.5	3101.2	1556.6	1806.6	1557.1	2052	954.2	494.5	705.1	345.4	467.1	162	187.2	186.6	876.3	1143.6	4000.2
FALSE	High	Master Protein	P17427	AP-2 complex subunit alpha-2 OS=Mus musculus OX=10090 GN=Ap2a2 PE=1 SV=2	0	69.276	20	20	31	11	11	938	104	6.93	82.49	20	9	2045	1789.6	1534.6	3154.8	2084.4	1981.3	2297.4	2060.6	1909.6	2433.5	2184	2285.9	1598.3	1805	3797.8	1627.7	2218.9	1932.2	2992.7	3276.7	1296.7	596.8	302.2	726.3	315	778.3	326.8	376.7	347.9	777.4	1053.1	2285.9
FALSE	High	Master Protein	Q80W22	Threonine synthase-like 2 OS=Mus musculus OX=10090 GN=Thnsl2 PE=1 SV=1	0	68.945	29	15	28	15	15	483	54.2	6.39	74.95	15	0	3962.4	4060.9	3027.5	1726.6	1786.6	1024.4	883	771.3	1022.6	1835	2777.9	3225.9	2140.8	1641.8	992.2	1210.2	2201.3	1020.8	1165.1	1064.9	2512.5	1354.2	596.2	397.5	270	402.4	125.6	141	186.3	586.2	1339.5	3225.9
FALSE	High	Master Protein	Q9CRB6	Tubulin polymerization-promoting protein family member 3 OS=Mus musculus OX=10090 GN=Tppp3 PE=1 SV=1	0	68.889	65	15	52	14	15	176	19	9.11	161.07	15	0	9466.7	6636.5	4638.8	12709.6	4987.3	2189.2	2181.4	1394.4	1916.7	7899.1	4947	10435.1	15030.4	12778.1	5249.7	2797.1	8352.4	3071	2961.9	2129.2	6002.7	2213.1	913.5	2926	753.7	860	310.3	254.9	349.2	2523.4	2385.4	10435.1
FALSE	High	Master Protein	P70335	Rho-associated protein kinase 1 OS=Mus musculus OX=10090 GN=Rock1 PE=1 SV=1	0	68.664	15	23	33	20	20	1354	158.1	5.86	80.28	23	3	1924.8	1637.6	1499.5	1727.9	1414.7	975	809.9	812.3	815.6	1475.6	1362.5	1942.8	1451.3	1996.9	1783.4	1127.7	1723.9	1268.9	1547.3	1032.8	1220.5	546.1	295.3	397.8	213.8	383	115.2	148.5	148.6	471.4	657	1942.8
FALSE	High	Master Protein	Q8VEK3	Heterogeneous nuclear ribonucleoprotein U OS=Mus musculus OX=10090 GN=Hnrnpu PE=1 SV=1	0	68.655	22	17	36	17	17	800	87.9	6.24	107.21	17	0	7423	5000.1	5838.7	4858.4	6200.2	2770.9	3105.2	2844.5	2793.3	3790.5	4655	6074.9	3697.3	4016.6	2832.7	2283.2	5187.4	2072.6	1994.6	2161.6	4706.8	1667.4	1149.8	1118.5	937	1088.5	441.7	520	508.9	1210.9	2244.6	6074.9
FALSE	High	Master Protein	Q9Z2U0	Proteasome subunit alpha type-7 OS=Mus musculus OX=10090 GN=Psma7 PE=1 SV=1	0	68.595	59	14	37	10	14	248	27.8	8.46	103.22	14	0	4822.2	4715.5	4178.7	4351.1	4373.2	3228.4	3065.8	2785.4	2923.9	2670.8	4100.5	4081.1	3160.1	2774.9	2229.5	1851.1	3391	1570.4	1789.9	2923.3	3057.7	1572.5	822.9	1001.7	660.9	1268.2	436.1	509.2	532.7	853.2	1977.2	4081.1
FALSE	High	Master Protein	P26443	Glutamate dehydrogenase 1, mitochondrial OS=Mus musculus OX=10090 GN=Glud1 PE=1 SV=1	0	68.478	38	18	30	18	18	558	61.3	8	86.63	18	0	6392.8	4665.7	3991.3	1814.4	2859.2	1180.2	1181.7	990.1	1532.5	3007	3614.5	4675.8	3197.5	3312.1	1033.9	1310.2	3910.1	1001	3584.6	1762.4	4053.6	1555.9	786	417.7	432.1	463.6	168.1	181	279.2	960.6	1742.9	4675.8
FALSE	High	Master Protein	Q60597	2-oxoglutarate dehydrogenase, mitochondrial OS=Mus musculus OX=10090 GN=Ogdh PE=1 SV=3	0	68.441	22	22	33	22	22	1023	116.4	6.83	82.63	22	0	3836.7	3027.8	3025	1235.8	1850.1	719.9	609.5	572.2	918.3	2463.6	1929.1	3817.8	2945.2	2885.9	1259.7	1019.7	3434.5	843.3	1265.7	998.1	2432.8	1009.7	595.7	284.5	279.6	282.8	86.7	104.6	167.3	787	930.2	3817.8
FALSE	High	Master Protein	Q9CYR6	Phosphoacetylglucosamine mutase OS=Mus musculus OX=10090 GN=Pgm3 PE=1 SV=1	0	68.339	25	13	28	13	13	542	59.4	6.2	86.01	13	0	2090.1	2213.7	1737.7	1992.9	1334.7	872.1	859.8	1059.6	750.9	1021.1	1628.6	1918.6	1349.1	857.2	1014.7	400	1217.7	448.8	766	441.1	1325.3	738.2	342.2	458.8	201.7	342.6	122.3	193.7	136.8	326.2	785.3	1918.6
FALSE	High	Master Protein	P01864	Ig gamma-2A chain C region secreted form OS=Mus musculus OX=10090 PE=1 SV=1	0	68.228	19	5	57	4	5	335	36.6	8.22	211.72	5	0	1698.5	2381	3716.1	1676.2	1454.4	2064	7914.4	9068	9365.2	4642.6	4084.7	1940.7	1960.7	2458.1	8253.6	8745.3	6206.8	7216.3	6770.2	6142.6	1077	794	731.8	385.9	219.8	810.8	1125.8	1657.7	1706.2	1483.1	1969.6	1940.7
FALSE	High	Master Protein	P46664	Adenylosuccinate synthetase isozyme 2 OS=Mus musculus OX=10090 GN=Adss2 PE=1 SV=2	0	68.129	38	15	31	13	13	456	50	6.38	103.76	15	2	3986.1	3215.8	2801	4770.7	2876.4	2092.5	1842.6	1451.2	1497.4	2288.9	2976.6	3215.2	3116.5	2415.7	2606.4	991.2	2294.9	1355	1236.3	1359	2527.5	1072.4	551.6	1098.3	434.7	822	262.1	265.3	272.8	731.2	1435.3	3215.2
FALSE	High	Master Protein	Q9EQH3	Vacuolar protein sorting-associated protein 35 OS=Mus musculus OX=10090 GN=Vps35 PE=1 SV=1	0	68.037	27	19	33	19	19	796	91.7	5.44	99.51	19	0	4647.2	4077.7	2998.6	6628	3612.9	3306	2676.3	2383.9	2390.4	3015.8	3935.6	3965.7	2281.7	2381.4	3926	1624.8	3481.4	1714.3	2163.1	2786.1	2946.7	1359.8	590.5	1525.9	546	1298.7	380.7	435.8	435.5	963.4	1897.7	3965.7
FALSE	High	Master Protein	Q08879	Fibulin-1 OS=Mus musculus OX=10090 GN=Fbln1 PE=1 SV=2	0	67.881	25	15	38	15	15	705	78	5.16	113.25	15	0	1209.8	1386.3	2223.2	2210.5	1861.4	4249.2	2609.5	2234	6058.1	2051.3	1909	968.1	1825.1	2647.5	2918.8	4528.5	1290.8	4772.4	2216.2	1453.5	767.1	462.3	437.8	508.9	281.3	1669.2	371.2	408.4	1103.7	655.3	920.5	968.1
FALSE	High	Master Protein	P61205	ADP-ribosylation factor 3 OS=Mus musculus OX=10090 GN=Arf3 PE=2 SV=2	0	67.757	57	8	44	0	3	181	20.6	7.43	146.73	8	0	3014.9	2896.5	2554.2	4692.1	1870	1271.8	1535.4	1391.6	1100.5	2128.3	2287.3	2592.8	3644.4	2559.4	3496.2	894.9	2144.5	1478.2	1472.6	1009.4	1911.7	965.9	503	1080.2	282.6	499.6	218.4	254.4	200.5	679.9	1102.9	2592.8
FALSE	High	Master Protein	Q91ZJ5	UTP--glucose-1-phosphate uridylyltransferase OS=Mus musculus OX=10090 GN=Ugp2 PE=1 SV=3	0	67.573	35	17	38	17	17	508	56.9	7.61	113.29	17	0	4809.8	4759.9	3443.9	2991.1	3103.4	2436.7	1976.8	1846.2	2076.4	2821.4	3443	4577.8	3099.3	2722.7	2752.3	1470.8	3344.1	1467.9	2704	1927.9	3049.8	1587.3	678.2	688.6	469	957.2	281.2	337.5	378.3	901.3	1660.2	4577.8
FALSE	High	Master Protein	Q63844	Mitogen-activated protein kinase 3 OS=Mus musculus OX=10090 GN=Mapk3 PE=1 SV=5	0	67.303	44	16	34	12	12	380	43	6.61	98.17	16	5	2115.2	2119.8	1821	2744.3	1858.1	1212.5	1223.2	1213.3	1151.6	2266.4	1684.2	3474.7	2678	2748.8	2861.2	1345.3	3035.4	1057	1732.6	1450.3	1341.2	706.9	358.6	631.8	280.8	476.3	174	221.8	209.8	724	812.1	3474.7
FALSE	High	Master Protein	P47791	Glutathione reductase, mitochondrial OS=Mus musculus OX=10090 GN=Gsr PE=1 SV=3	0	67.289	37	14	32	14	14	500	53.6	7.99	121.79	14	0	2473.6	2548.6	2739.6	1415.6	2437.1	1039.1	1254.2	1091.9	1242.7	2520.9	2043.8	3454.7	3498.3	3688.4	1820.8	1373.7	2929.1	1329.2	1782.9	2061.9	1568.5	849.9	539.5	325.9	368.3	408.2	178.4	199.6	226.4	805.3	985.5	3454.7
FALSE	High	Master Protein	Q91XA9	Acidic mammalian chitinase OS=Mus musculus OX=10090 GN=Chia PE=1 SV=2	0	67.256	30	11	34	11	11	473	52	5.06	119.85	11	0	3668.4	2986.1	4680.4	1945.5	6124.1	1632	954.7	885.6	1501.8	2052.2	2245	2830.8	2871.7	5967.8	953.4	1147.5	2289.7	822.7	965.9	746.5	2326.1	995.8	921.7	447.9	925.5	641.1	135.8	161.9	273.6	655.6	1082.5	2830.8
FALSE	High	Master Protein	P97449	Aminopeptidase N OS=Mus musculus OX=10090 GN=Anpep PE=1 SV=4	0	67.239	19	17	34	17	17	966	109.6	5.9	102.97	17	0	5305.1	5936.9	4479.3	2618.4	7420.3	3167.5	2246.1	2207.2	3388.3	4969.1	4169.3	6010.8	6506	5725.3	2290.3	3932.9	6939.8	2702.3	2503.4	2586.2	3363.9	1979.8	882.1	602.8	1121.4	1244.3	319.5	403.5	617.3	1587.4	2010.4	6010.8
FALSE	High	Master Protein	Q61730	Interleukin-1 receptor accessory protein OS=Mus musculus OX=10090 GN=Il1rap PE=1 SV=1	0	66.824	21	13	51	13	13	570	65.7	7.77	136.47	13	0	1952	2908.5	4421.9	2641.8	4293.8	8135.8	5754.1	6466.9	6637.7	5222.6	4890	2128.3	4470	3307.2	3810	11051.1	5155.3	6359.1	8929.1	8529.1	1237.7	969.9	870.8	608.2	648.9	3196	818.5	1182.2	1209.3	1668.4	2357.9	2128.3
FALSE	High	Master Protein	Q91WQ3	Tyrosine--tRNA ligase, cytoplasmic OS=Mus musculus OX=10090 GN=Yars1 PE=1 SV=3	0	66.789	32	19	33	19	19	528	59.1	7.01	88.81	19	0	3053.4	2573.8	2042.9	1519	1823.7	989.2	804.9	1234.1	879.3	1934.2	1950.3	3983.1	2179.1	1915.2	1533.7	822.6	2420.3	827.8	1302.7	785	1936.1	858.3	402.3	349.7	275.6	388.6	114.5	225.6	160.2	617.9	940.4	3983.1
FALSE	High	Master Protein	Q3UM45	Protein phosphatase 1 regulatory subunit 7 OS=Mus musculus OX=10090 GN=Ppp1r7 PE=1 SV=2	0	66.693	53	16	32	16	16	361	41.3	4.92	99.18	16	0	4048.7	3911.8	3285	5002.6	2932.7	1704	1394.1	1272.9	1308.6	4984.7	3091.3	6592.7	7056	5304.9	4922.4	1943.1	5564.6	2355.2	2540.5	3274.4	2567.2	1304.5	646.9	1151.7	443.2	669.4	198.3	232.7	238.4	1592.4	1490.6	6592.7
FALSE	High	Master Protein	P60335	Poly(rC)-binding protein 1 OS=Mus musculus OX=10090 GN=Pcbp1 PE=1 SV=1	0	66.639	58	15	31	9	9	356	37.5	7.09	101.92	15	7	3861.6	3390.9	2820.8	3302.1	2179.7	1181.2	1226	1051.9	1224	2496.8	2404.2	4035	3389.5	3097.4	2778.5	821.9	2836.8	1043.2	1024.6	1118	2448.6	1130.8	555.5	760.2	329.4	464	174.4	192.3	223	797.6	1159.3	4035
FALSE	High	Master Protein	Q8BHB9	Chloride intracellular channel protein 6 OS=Mus musculus OX=10090 GN=Clic6 PE=1 SV=1	0	66.584	29	15	27	14	14	596	62.8	4.32	88.24	15	1	4848.9	4239	4193.4	860.5	2916.8	1076	996.9	730.8	1059.4	3359.2	2747.9	6213.4	4823.6	5121.2	1289.2	856.9	4101.2	852.8	922.5	774.3	3074.6	1413.6	825.8	198.1	440.8	422.7	141.8	133.6	193	1073.1	1325	6213.4
FALSE	High	Master Protein	P13707	Glycerol-3-phosphate dehydrogenase [NAD(+)], cytoplasmic OS=Mus musculus OX=10090 GN=Gpd1 PE=1 SV=3	0	66.567	45	17	39	16	16	349	37.5	7.17	105.58	17	1	3780.1	3343	3578	1291.8	1931.5	1107.9	1119.9	990.1	1194.4	2077.6	2136.1	3699.8	2456.5	3043.5	1516.4	986.1	2850.8	954.5	1555	864.3	2396.9	1114.8	704.6	297.4	291.9	435.2	159.3	181	217.6	663.7	1030	3699.8
FALSE	High	Master Protein	Q9CVB6	Actin-related protein 2/3 complex subunit 2 OS=Mus musculus OX=10090 GN=Arpc2 PE=1 SV=3	0	66.558	43	14	31	14	14	300	34.3	7.36	93.26	14	0	2563.4	2306.6	1897.7	1641.9	2339.8	1624.9	2218	2039.3	1591.8	2862.1	2456.9	3627.2	2338	3359.4	2259.9	1422.6	3039	1753	2215.5	3724.8	1625.4	769.2	373.7	378	353.6	638.3	315.5	372.8	290	914.3	1184.7	3627.2
FALSE	High	Master Protein	Q62188	Dihydropyrimidinase-related protein 3 OS=Mus musculus OX=10090 GN=Dpysl3 PE=1 SV=1	0	66.465	32	16	32	11	12	570	61.9	6.49	95.97	16	0	2181.4	1739.9	2247	2421.2	1675.4	835.7	1083.3	1136.7	1111.5	1701	1392	1343.5	1316.5	2479.4	3230.6	1326.3	1438.2	1736.7	1416	954.6	1383.2	580.2	442.5	557.4	253.2	328.3	154.1	207.8	202.5	543.4	671.2	1343.5
FALSE	High	Master Protein	Q6P1B1	Xaa-Pro aminopeptidase 1 OS=Mus musculus OX=10090 GN=Xpnpep1 PE=1 SV=1	0	66.124	26	17	36	16	16	623	69.5	5.54	99.13	17	1	4695.1	4668.7	3971.5	4550.9	3454.8	2183.4	2131.5	1933.7	1877.2	1830.3	3702.3	2424.6	1971.7	2076.9	2342.7	897.8	1909.5	1119.9	1418.1	1657	2977.1	1556.9	782.1	1047.7	522.1	857.7	303.2	353.5	342	584.7	1785.2	2424.6
FALSE	High	Master Protein	Q6NZJ6	Eukaryotic translation initiation factor 4 gamma 1 OS=Mus musculus OX=10090 GN=Eif4g1 PE=1 SV=1	0	66.057	12	21	26	18	18	1600	176	5.4	67.4	21	3	2093.3	1855.9	1742.3	1918.6	1761.5	915.7	1129.7	943.6	960.6	2351.8	1591.9	3046	2216.1	2408.3	2714.4	1429.9	2408.9	1835.7	2669.1	1956.5	1327.3	618.9	343.1	441.7	266.2	359.7	160.7	172.5	175	751.3	767.6	3046
FALSE	High	Master Protein	P14685	26S proteasome non-ATPase regulatory subunit 3 OS=Mus musculus OX=10090 GN=Psmd3 PE=1 SV=3	0	66.022	29	16	27	16	16	530	60.7	8.44	80.68	16	0	5854.3	4974	5307.5	4341.1	3956.3	3056.8	2855.6	2679.3	2852.6	2118.9	4651.1	2349.5	1645.4	1956.9	2086.9	955.5	1889	1126.8	1538.3	2266.6	3712.1	1658.7	1045.2	999.4	597.9	1200.8	406.2	489.8	519.7	676.9	2242.7	2349.5
FALSE	High	Master Protein	Q9DCV7	Keratin, type II cytoskeletal 7 OS=Mus musculus OX=10090 GN=Krt7 PE=1 SV=1	0	66.014	30	15	37	9	10	457	50.7	5.87	108.66	15	1	2338.3	3275.5	3695.8	5110.8	3180.1	4383.6	8046.6	7853.6	5986.2	2216.6	3572.4	1071	1468	3011.7	3283.5	3728.5	1470.9	3443.2	3127.5	2074.1	1482.7	1092.3	727.8	1176.6	480.6	1722	1144.6	1435.7	1090.6	708.1	1722.6	1071
FALSE	High	Master Protein	P97384	Annexin A11 OS=Mus musculus OX=10090 GN=Anxa11 PE=1 SV=2	0	65.898	33	16	32	15	15	503	54	7.66	98.35	16	0	5897.5	6285.9	4592.6	3947.1	3517.6	1455.8	1697.8	1280	1597.8	1933.3	3615.4	3717.9	2774.8	2656.5	755.6	673	2767.1	674.5	762.5	547.4	3739.5	2096.2	904.4	908.7	531.6	571.9	241.5	234	291.1	617.6	1743.3	3717.9
FALSE	High	Master Protein	P09803	Cadherin-1 OS=Mus musculus OX=10090 GN=Cdh1 PE=1 SV=1	0	65.597	16	15	30	15	15	884	98.2	4.83	82.7	15	0	2600.1	4190.7	4548.9	1702.7	6615.7	2666.8	1715.3	1826.5	2096.2	3895.4	2776.3	4483.9	7206.6	7369.5	1117.6	2247.5	7498.6	1650.5	1740.2	1303	1648.7	1397.5	895.8	392	999.8	1047.6	244	333.9	381.9	1244.4	1338.7	4483.9
FALSE	High	Master Protein	P12382	ATP-dependent 6-phosphofructokinase, liver type OS=Mus musculus OX=10090 GN=Pfkl PE=1 SV=4	0	65.597	26	18	35	13	13	780	85.3	7.17	101.02	18	5	6299.6	5731.1	5135.4	4423.6	4365.9	3026.5	2173.7	2262.5	2797.1	3717.9	4386.7	5451.7	4374.5	4699.1	3692.6	2017.5	4120.9	2064	1620	2108.6	3994.5	1911.2	1011.3	1018.4	659.8	1188.9	309.2	413.6	509.6	1187.7	2115.2	5451.7
FALSE	High	Master Protein	P48758	Carbonyl reductase [NADPH] 1 OS=Mus musculus OX=10090 GN=Cbr1 PE=1 SV=3	0	65.383	64	14	31	13	13	277	30.6	8.31	103.28	14	1	6956.8	6686.2	6650.7	2926.8	3468	3049.9	2309.4	2015.2	2067.7	3804.6	4905.7	5711.2	4996.6	4168.5	3062.8	2216.8	3969.5	1784	1176.2	984.3	4411.2	2229.7	1309.7	673.8	524.1	1198.1	328.5	368.4	376.7	1215.4	2365.5	5711.2
FALSE	High	Master Protein	P14211	Calreticulin OS=Mus musculus OX=10090 GN=Calr PE=1 SV=1	0	65.332	36	17	38	17	17	416	48	4.49	95.71	17	0	5686.5	3973.3	3625.7	2381.6	3683.7	2053.6	1290.7	1120.8	1608.2	4111.1	3865.7	6422.5	4520.7	5346.5	1979.8	2054.8	6420.7	1393.8	1933.8	3189	3605.7	1325	714	548.3	556.7	806.7	183.6	204.9	293	1313.3	1864	6422.5
FALSE	High	Master Protein	P61161	Actin-related protein 2 OS=Mus musculus OX=10090 GN=Actr2 PE=1 SV=1	0	65.051	34	13	38	12	12	394	44.7	6.74	116.81	13	0	3330.3	3629	2739.1	2429.4	2748.1	2112.1	2667.2	2741.7	2275.1	3439.9	2981.6	3314.7	3762	3862.3	2784.1	2212.4	3036.2	2376.7	3281.3	4241	2111.7	1210.2	539.4	559.3	415.3	829.7	379.4	501.2	414.5	1098.9	1437.7	3314.7
FALSE	High	Master Protein	O54988	STE20-like serine/threonine-protein kinase OS=Mus musculus OX=10090 GN=Slk PE=1 SV=2	0	64.809	14	19	29	18	18	1233	141.4	5.14	77.77	19	1	1683.8	1460.1	1146.6	1855.2	1355.2	946.5	815.5	926.7	799.7	1192.7	1348.4	1620.9	1157.1	1245	1820.4	654.7	1404.8	800.3	802.3	856.2	1067.7	486.9	225.8	427.1	204.8	371.8	116	169.4	145.7	381	650.2	1620.9
FALSE	High	Master Protein	Q3ULJ0	Glycerol-3-phosphate dehydrogenase 1-like protein OS=Mus musculus OX=10090 GN=Gpd1l PE=1 SV=2	0	64.776	41	14	36	13	13	351	38.2	6.77	114.04	14	0	5647.8	5409.7	5390.3	3427.2	3406.5	1451.3	1250.6	1141.6	1343.7	2718.4	3646.7	5171.8	3738.7	4499.9	2333.8	1098.5	3881.4	901.9	947.7	833.1	3581.2	1804	1061.5	789	514.8	570.1	177.9	208.7	244.8	868.4	1758.4	5171.8
FALSE	High	Master Protein	Q91X52	L-xylulose reductase OS=Mus musculus OX=10090 GN=Dcxr PE=1 SV=2	0	64.776	52	12	57	11	11	244	25.7	7.31	153.43	12	0	1498.1	1483.2	1263.4	653.3	840.4	524.4	353.6	340.8	502.8	830.8	1230.2	1652.2	847.6	787	660.2	304.4	717.2	315.3	297.7	357.2	949.9	494.6	248.8	150.4	127	206	50.3	62.3	91.6	265.4	593.2	1652.2
FALSE	High	Master Protein	Q04447	Creatine kinase B-type OS=Mus musculus OX=10090 GN=Ckb PE=1 SV=1	0	64.757	38	11	27	10	10	381	42.7	5.67	97.97	11	0	4256.5	2487.7	4023.8	3577.9	2951.2	2038.3	1694.2	1884.5	1519.9	640.8	2762.6	730.4	804.9	1000.9	723.8	232.1	668.2	454.8	481.5	529.8	2699	829.6	792.4	823.7	446	800.7	241	344.5	276.9	204.7	1332.1	730.4
FALSE	High	Master Protein	Q9D0I9	Arginine--tRNA ligase, cytoplasmic OS=Mus musculus OX=10090 GN=Rars1 PE=1 SV=2	0	64.749	27	18	30	18	18	660	75.6	7.55	84.36	18	0	3588.3	3207.1	3082.9	2925.9	2817.5	1816	1640.1	1620.3	1675.8	2753.8	2854.3	3354.5	2287.9	2377.3	3145.1	1016.8	2573.2	1411	1700.4	2119.7	2275.3	1069.5	607.1	673.6	425.8	713.4	233.3	296.2	305.3	879.7	1376.3	3354.5
FALSE	High	Master Protein	O88569	Heterogeneous nuclear ribonucleoproteins A2/B1 OS=Mus musculus OX=10090 GN=Hnrnpa2b1 PE=1 SV=2	0	64.719	44	15	35	13	13	353	37.4	8.95	92.85	15	2	7913.5	4672	5670.1	3947.1	5011.1	2154.6	2301.6	2380.1	1973.8	4299.5	4146.3	5558.3	4900.2	6474	2887.9	3048.2	5062	2760.9	2653	3306.8	5017.8	1558	1116.6	908.7	757.3	846.4	327.4	435.1	359.6	1373.5	1999.3	5558.3
FALSE	High	Master Protein	Q64105	Sepiapterin reductase OS=Mus musculus OX=10090 GN=Spr PE=1 SV=1	0	64.712	54	12	29	12	12	261	27.9	5.74	106.48	12	0	2602.3	2498.5	2416.1	2656.2	1582.8	941.1	805.6	716.6	861.8	2388.8	2108.5	4235.7	3823.7	2389.6	2276.7	1054.7	2340.5	1144	1355.9	1214.6	1650.1	833.2	475.8	611.5	239.2	369.7	114.6	131	157	763.1	1016.7	4235.7
FALSE	High	Master Protein	Q9WTP7	GTP:AMP phosphotransferase AK3, mitochondrial OS=Mus musculus OX=10090 GN=Ak3 PE=1 SV=3	0	64.625	68	14	28	14	14	227	25.4	8.84	79.86	14	0	3204.8	2458.3	2166.8	531.7	1342.6	516.5	583.5	507.6	659.2	1358.3	1563.9	2571.6	1867.8	1721.8	718.7	463.5	1740.5	413.5	487.8	371.1	2032.1	819.8	426.7	122.4	202.9	202.9	83	92.8	120.1	433.9	754.1	2571.6
FALSE	High	Master Protein	P26928	Hepatocyte growth factor-like protein OS=Mus musculus OX=10090 GN=Mst1 PE=2 SV=2	0	64.6	27	16	31	16	16	716	80.6	7.56	97.22	16	0	1634.6	2000.1	2182	3343.8	2503.9	5522.7	6057.8	5559.4	6293	2234.7	3665.6	1062.9	1461.8	1382.1	2217.4	4285.4	1870.1	4862	4361.1	3056.6	1036.5	667	429.7	769.8	378.4	2169.5	861.7	1016.3	1146.5	713.9	1767.5	1062.9
FALSE	High	Master Protein	Q9JLJ2	4-trimethylaminobutyraldehyde dehydrogenase OS=Mus musculus OX=10090 GN=Aldh9a1 PE=1 SV=1	0	64.536	30	14	30	14	14	494	53.5	6.98	94.87	14	0	3867.8	3816.8	3189	2865.1	2852.6	1644.7	1520.6	1693	1483.1	1683.5	2910.3	2804.6	2084.9	1825.4	1198.5	666.4	2274.1	747.7	805.8	985.8	2452.5	1272.8	628	659.6	431.1	646.1	216.3	309.5	270.2	537.8	1403.3	2804.6
FALSE	High	Master Protein	Q9CZ44	NSFL1 cofactor p47 OS=Mus musculus OX=10090 GN=Nsfl1c PE=1 SV=1	0	64.386	45	15	25	15	15	370	40.7	5.15	71.61	15	0	1591.1	1538	1652.4	1236.6	1371.1	908.5	963.1	948	1020.4	1561.1	1382.4	2440.5	2541.5	2254.9	1701.1	654	1849.3	808	1304.1	881.3	1008.9	512.9	325.4	284.7	207.2	356.9	137	173.3	185.9	498.7	666.6	2440.5
FALSE	High	Master Protein	P46935	E3 ubiquitin-protein ligase NEDD4 OS=Mus musculus OX=10090 GN=Nedd4 PE=1 SV=3	0	64.329	22	19	28	16	16	887	102.6	5.26	77.77	19	3	2835	2658.1	1960.6	2651	1529.9	982.6	1096	856.6	945.2	1922.3	1823.8	2743.6	1888	2080.2	2986.6	886.9	2288.4	1253.4	1714.4	1151.5	1797.6	886.4	386.1	610.3	231.2	386	155.9	156.6	172.2	614.1	879.4	2743.6
FALSE	High	Master Protein	O88947	Coagulation factor X OS=Mus musculus OX=10090 GN=F10 PE=1 SV=1	0	64.259	32	14	32	13	13	481	54	5.66	94.57	14	1	1063.9	1363.5	1405.1	2030.2	1361.8	3280	5276	4073.7	4187.5	2931.2	2249.9	1294.4	2192.7	2005.9	3366.7	6986.2	2341.3	4868	4219.9	3964.7	674.6	454.7	276.7	467.4	205.8	1288.5	750.5	744.7	762.9	936.4	1084.9	1294.4
FALSE	High	Master Protein	P50580	Proliferation-associated protein 2G4 OS=Mus musculus OX=10090 GN=Pa2g4 PE=1 SV=3	0	64.151	44	15	27	15	15	394	43.7	6.86	80.81	15	0	2181.6	1730.3	1656.4	1549	1333.3	803.1	938.5	881.8	755.3	2002.5	1433.7	2878.2	2288.3	2296.5	1559.9	886.1	2125.4	912.3	1159.5	1400.2	1383.3	577	326.2	356.6	201.5	315.5	133.5	161.2	137.6	639.7	691.3	2878.2
FALSE	High	Master Protein	P28828	Receptor-type tyrosine-protein phosphatase mu OS=Mus musculus OX=10090 GN=Ptprm PE=1 SV=2	0	64.135	12	14	27	14	14	1452	163.5	6.68	89.13	14	0	1903.4	2040.9	2458.3	1648.9	2836.7	1383.5	765.6	582	810.7	1075	1535.5	1399.7	1705.3	1874.4	825.8	586.9	2081.3	426.4	562.6	287.7	1206.9	680.6	484.1	379.6	428.7	543.5	108.9	106.4	147.7	343.4	740.4	1399.7
FALSE	High	Master Protein	Q62351	Transferrin receptor protein 1 OS=Mus musculus OX=10090 GN=Tfrc PE=1 SV=1	0	64.1	20	17	29	17	17	763	85.7	6.57	82.81	17	0	1379.2	1784.2	1628.5	2733.1	2833.4	5017.7	4556.2	4632.2	4004.1	3158.5	2659.3	1550.4	1922.4	2020.6	3423.8	7439.5	2552	3878.2	4289.1	3827.7	874.5	595	320.7	629.2	428.2	1971.1	648.1	846.8	729.5	1009	1282.3	1550.4
FALSE	High	Master Protein	P18654	Ribosomal protein S6 kinase alpha-3 OS=Mus musculus OX=10090 GN=Rps6ka3 PE=1 SV=2	0	63.944	23	19	28	11	12	740	83.6	6.89	79.52	19	7	5259.4	4613.5	3293.6	4550	3114.6	1767.2	1604.3	1359.9	1643.9	2303.3	3896.2	4232.1	2384.7	2075.3	2274.9	1510.2	2901.6	944.1	994.5	943.4	3334.9	1538.5	648.6	1047.5	470.7	694.2	228.2	248.6	299.5	735.8	1878.7	4232.1
FALSE	High	Master Protein	Q02819	Nucleobindin-1 OS=Mus musculus OX=10090 GN=Nucb1 PE=1 SV=2	0	63.7	37	17	33	17	17	459	53.4	5.07	88.55	17	0	1656.1	1697.9	1991.6	1077.7	1995	2319.8	3735.1	3797.4	2637.4	2898.1	2380.8	1625.8	2261	2712.9	1795.6	1860.6	2631.8	2855.7	3881	5320.7	1050.1	566.2	392.2	248.1	301.5	911.3	531.3	694.2	480.5	925.8	1148	1625.8
FALSE	High	Master Protein	Q8K2Q9	Shootin-1 OS=Mus musculus OX=10090 GN=Shtn1 PE=1 SV=1	0	63.641	29	17	26	17	17	631	71.3	5.44	77.87	17	0	2052.3	1658.9	1314.2	2259.2	1754.8	1237.7	831.7	909.1	907.3	1753.6	1782.1	2909.8	1675.4	1845	1899.9	897.8	2426.8	722.7	889.7	1200.1	1301.3	553.2	258.8	520.1	265.2	486.2	118.3	166.2	165.3	560.2	859.3	2909.8
FALSE	High	Master Protein	Q08761	Vitamin K-dependent protein S OS=Mus musculus OX=10090 GN=Pros1 PE=2 SV=1	0	63.632	24	17	40	17	17	675	74.9	5.82	123.87	17	0	5141	5952.8	6079.9	5403.1	6439	8200.5	8220.9	9399.4	8609.9	4588.4	5816.2	2644.1	4307.6	4219.9	5455	10623.4	3929.8	13554.7	6830.3	3356	3259.8	1985.1	1197.3	1243.9	973.1	3221.4	1169.4	1718.3	1568.6	1465.8	2804.5	2644.1
FALSE	High	Master Protein	P23492	Purine nucleoside phosphorylase OS=Mus musculus OX=10090 GN=Pnp PE=1 SV=2	0	63.546	44	11	34	11	11	289	32.3	6.16	109.5	11	0	2296.9	1995	1717.9	2224	1861.4	991.5	812.7	831.5	810.2	2110.8	1660.8	2845.3	2583.3	2730.8	2755.6	1289.8	2506.1	981.2	1443.9	1758.8	1456.4	665.3	338.3	512	281.3	389.5	115.6	152	147.6	674.3	800.8	2845.3
FALSE	High	Master Protein	Q9JMA1	Ubiquitin carboxyl-terminal hydrolase 14 OS=Mus musculus OX=10090 GN=Usp14 PE=1 SV=3	0	63.193	31	16	26	16	16	493	56	5.24	88.22	16	0	3610.6	3011	2222.1	3202.2	1784.6	1268.5	1204.2	992.8	1007.8	3290.6	2663.3	4951.9	3886.2	3264.7	2941.7	1411.7	3659.5	1395.5	1727	2365.6	2289.4	1004.1	437.6	737.2	269.7	498.3	171.3	181.5	183.6	1051.2	1284.2	4951.9
FALSE	High	Master Protein	Q9WTR5	Cadherin-13 OS=Mus musculus OX=10090 GN=Cdh13 PE=1 SV=2	0	63.052	22	13	30	13	13	714	78.1	5.12	107.06	13	0	3563.6	2662.6	5456.8	2012	3396.5	1564.5	1180.3	846.2	1371.1	2375.9	1729.2	2357.9	3080	4030.5	992.2	1032.1	3354.7	753.8	746.4	497.3	2259.6	887.9	1074.6	463.2	513.3	614.6	167.9	154.7	249.8	759	833.8	2357.9
FALSE	High	Master Protein	P70336	Rho-associated protein kinase 2 OS=Mus musculus OX=10090 GN=Rock2 PE=1 SV=1	0	63.024	15	22	31	19	19	1388	160.5	5.99	73.36	22	0	1125.7	877.7	813	903.9	1034.2	531.8	520.2	439.8	533	1542	834.7	2294	1726.9	1592	1834.9	1042.3	1679.3	1100.1	1331.4	818.3	713.8	292.7	160.1	208.1	156.3	208.9	74	80.4	97.1	492.6	402.5	2294
FALSE	High	Master Protein	P03987	Ig gamma-3 chain C region OS=Mus musculus OX=10090 PE=1 SV=2	0	62.781	26	9	45	9	9	398	43.9	7.14	139.27	9	0	5157.5	10725.8	7523.1	4807.2	2666.7	5876.8	16207.7	11659.2	11714.9	4290.1	7896.3	1692.4	2436.2	2404.3	5765	12623.4	7946.8	6190.3	5248	4061.2	3270.3	3576.8	1481.5	1106.7	403	2308.6	2305.5	2131.4	2134.3	1370.5	3807.5	1692.4
FALSE	High	Master Protein	P51885	Lumican OS=Mus musculus OX=10090 GN=Lum PE=1 SV=2	0	62.725	38	11	41	11	11	338	38.2	6.43	121.46	11	0	4156.2	4794.9	3812.6	5880.9	5304.2	9858.7	6265.2	5102.1	4920.8	2620.7	4644.8	1837.7	2611.5	1887.5	4320.1	3795.6	2187.1	4015.2	2624.3	1794.9	2635.4	1599	750.8	1353.9	801.6	3872.8	891.2	932.7	896.5	837.2	2239.7	1837.7
FALSE	High	Master Protein	Q8BHN3	Neutral alpha-glucosidase AB OS=Mus musculus OX=10090 GN=Ganab PE=1 SV=1	0	62.565	21	20	35	20	20	944	106.8	6.06	96.86	20	0	2758.3	2493.1	2999.6	1587.6	2704.4	1581.1	1342	1413.5	1954	2699.6	2051.9	3396	3243.8	4342.4	1857.3	2300	3689.6	2157	2840.3	2097.3	1749	831.4	590.7	365.5	408.7	621.1	190.9	258.4	356	862.4	989.4	3396
FALSE	High	Master Protein	Q7TSV4	Phosphoglucomutase-2 OS=Mus musculus OX=10090 GN=Pgm2 PE=1 SV=1	0	62.554	27	17	32	16	16	620	68.7	6.14	79.07	17	1	3057.6	2638.3	2383.6	2046.7	2229.9	1066.4	986.3	938.7	990.7	1789.9	1826.3	2419.6	2283	3230.4	1665.1	1117.5	2071.7	982.9	1099.4	979	1938.8	879.8	469.4	471.2	337	418.9	140.3	171.6	180.5	571.8	880.6	2419.6
FALSE	High	Master Protein	P27046	Alpha-mannosidase 2 OS=Mus musculus OX=10090 GN=Man2a1 PE=1 SV=2	0	62.532	15	19	29	17	17	1150	131.5	8.03	80.98	19	2	2050.4	2214.9	2342	2343.9	3524.2	3862.2	3032.8	3171.6	3452.5	1703.5	2583	1239.8	1387.9	2982.3	2028	3157.7	1777.5	2456.8	1870.9	1446.7	1300.1	738.6	461.2	539.6	532.6	1517.2	431.4	579.8	629	544.2	1245.5	1239.8
FALSE	High	Master Protein	P00687	Alpha-amylase 1 OS=Mus musculus OX=10090 GN=Amy1 PE=1 SV=2	0	62.524	30	13	35	7	7	511	57.6	6.96	113.25	13	6	850.8	1051.3	2052	1066.4	1967.9	3236	3254.2	2741.1	3323.5	2751.2	1768.2	1357.9	2550.3	2612.4	2042	5077.4	2507.7	3906.6	4175.2	3693.8	539.5	350.6	404.1	245.5	297.4	1271.2	462.9	501.1	605.5	878.9	852.6	1357.9
FALSE	High	Master Protein	P27546	Microtubule-associated protein 4 OS=Mus musculus OX=10090 GN=Map4 PE=1 SV=3	0	62.51	17	18	29	18	18	1125	117.4	4.98	75.15	18	0	1686.8	1148.5	1098.4	1930.8	1075.9	770.3	826	871.4	685.6	3028.6	1301.8	3358.1	2846.6	3014.1	5511.1	1358.4	2347.7	1737.5	2295.2	2769.4	1069.6	383	216.3	444.5	162.6	302.6	117.5	159.3	124.9	967.5	627.7	3358.1
FALSE	High	Master Protein	O70456	14-3-3 protein sigma OS=Mus musculus OX=10090 GN=Sfn PE=1 SV=2	0	62.257	61	15	58	11	11	248	27.7	4.78	144.02	15	0	2081.4	1980.7	2170.9	1250.1	2495.3	1610.9	1148.7	1130.7	1305.3	3405.2	1907.5	4348.8	4008.1	4162.8	3950.3	2099.3	4097.3	3106.3	2876.6	2774.1	1319.8	660.5	427.5	287.8	377.1	632.8	163.4	206.7	237.8	1087.8	919.8	4348.8
FALSE	High	Master Protein	P01869	Ig gamma-1 chain C region, membrane-bound form OS=Mus musculus OX=10090 GN=Ighg1 PE=1 SV=2	0	62.254	22	6	57	0	6	393	43.4	6.44	178.35	6	0	1467.2	2630.2	2942.7	3815.1	3490.5	5658.9	6630	4869	6816.7	4998.2	3743.5	1032.5	1456.1	3246	11351.4	8009.5	4329.8	8372.3	6441.7	7363.5	930.3	877.1	579.5	878.3	527.5	2223	943.1	890.1	1241.9	1596.7	1805.1	1032.5
FALSE	High	Master Protein	Q8K010	5-oxoprolinase OS=Mus musculus OX=10090 GN=Oplah PE=1 SV=1	0	62.21	16	19	29	19	19	1288	137.5	6.28	71.9	19	0	2099.4	1912	1650.9	2617.9	1394.2	964	745.9	723.7	862.9	1875.7	1461.5	2234.1	2224.4	1841	2788.8	1789.1	1937.4	1499.8	1661.3	1010.3	1331.2	637.6	325.1	602.7	210.7	378.7	106.1	132.3	157.2	599.2	704.7	2234.1
FALSE	High	Master Protein	Q8BHG1	Nardilysin OS=Mus musculus OX=10090 GN=Nrdc PE=1 SV=1	0	62.071	15	17	31	17	17	1161	132.8	4.87	95.21	17	0	2091.8	1983.4	1597	2461.6	2101.6	1441.8	1261.2	1132.9	1195.5	2357.8	2061.4	2826	2171.6	2061.4	3046.9	1119	2624.3	1256.8	2082.7	2487.4	1326.4	661.4	314.5	566.7	317.6	566.4	179.4	207.1	217.8	753.2	994	2826
FALSE	High	Master Protein	P53810	Phosphatidylinositol transfer protein alpha isoform OS=Mus musculus OX=10090 GN=Pitpna PE=1 SV=2	0	61.936	62	17	36	14	14	271	31.9	6.37	92.67	17	3	3166.1	3424.8	3267.7	3637.4	4741.8	1986.6	1553.6	1492.3	1390.3	2822.3	3263.2	4165.5	4039.4	3237.8	2030.8	1335.8	3797.1	1355	5816.9	1897.3	2007.6	1142.1	643.5	837.4	716.6	780.4	221	272.8	253.3	901.6	1573.5	4165.5
FALSE	High	Master Protein	P46471	26S proteasome regulatory subunit 7 OS=Mus musculus OX=10090 GN=Psmc2 PE=1 SV=5	0	61.712	33	13	20	13	13	433	48.6	5.95	66.89	13	0	2337.5	1990.5	1738.7	2105.8	1994.4	1499.6	1267.5	1203.4	1307.5	1765.8	1973.5	2288.3	1570.6	1520.9	2468.5	720.4	1900.9	1036.3	1168.5	1859.2	1482.2	663.8	342.4	484.8	301.4	589.1	180.3	220	238.2	564.1	951.6	2288.3
FALSE	High	Master Protein	Q9QWL7	Keratin, type I cytoskeletal 17 OS=Mus musculus OX=10090 GN=Krt17 PE=1 SV=3	0	61.686	30	15	40	2	6	433	48.1	5.06	103	15	4	669.6	826.7	1629.5	2271.8	1476.9	1042.7	2297.4	2188.6	1984.8	868.7	1034.2	471.9	504.2	2775.7	1407.9	1849.6	473	1984.8	951.9	468.8	424.6	275.7	320.9	523	223.2	409.6	326.8	400.1	361.6	277.5	498.7	471.9
FALSE	High	Master Protein	Q61792	LIM and SH3 domain protein 1 OS=Mus musculus OX=10090 GN=Lasp1 PE=1 SV=1	0	61.595	50	14	37	14	14	263	30	7.05	103.17	14	0	3903.3	3609.6	2843.7	4076.1	2411.2	1514.4	1807.4	1472.6	1399.7	3859.4	3262.4	5778.4	4658.5	3984	4819.1	1378.8	4474.1	2167.4	2376.9	1567	2475	1203.7	560	938.4	364.4	594.9	257.1	269.2	255	1232.9	1573.1	5778.4
FALSE	High	Master Protein	Q9DCL9	Multifunctional protein ADE2 OS=Mus musculus OX=10090 GN=Paics PE=1 SV=4	0	61.482	39	17	32	17	17	425	47	7.23	89.48	17	0	2801	2552.2	2304.4	2850.3	1850.1	1263.4	1246.4	1101.2	978.7	2960.4	2037.2	4165	2777.5	3019.8	4833.6	1519	3226.4	1909.8	1975.8	1589.5	1776.1	851.1	453.8	656.2	279.6	496.3	177.3	201.3	178.3	945.7	982.3	4165
FALSE	High	Master Protein	Q07456	Protein AMBP OS=Mus musculus OX=10090 GN=Ambp PE=1 SV=2	0	61.451	33	11	34	11	11	349	39	6.32	108.04	11	0	1416.5	2087.1	2194.7	3002.4	2321.9	7342.1	13417.5	13263.1	12622.8	3086.2	5870.9	1188.6	2255.3	1618.1	2370.3	3647.5	1870.8	4523.4	4078	6076.9	898.2	696	432.2	691.2	350.9	2884.2	1908.6	2424.6	2299.7	985.9	2830.9	1188.6
FALSE	High	Master Protein	Q3UPL0	Protein transport protein Sec31A OS=Mus musculus OX=10090 GN=Sec31a PE=1 SV=2	0	61.254	16	20	29	20	20	1230	133.5	6.76	77.63	20	0	3001.5	2752.5	2826.4	2119.3	2576	1284	1044	1050.3	1165.8	1380.5	1940.7	1967.5	1418.2	1373.2	2075.7	775.2	1516.8	1044.1	1230.1	909.7	1903.2	917.9	556.6	487.9	389.3	504.4	148.5	192	212.4	441	935.8	1967.5
FALSE	High	Master Protein	P97807	Fumarate hydratase, mitochondrial OS=Mus musculus OX=10090 GN=Fh PE=1 SV=3	0	61.237	27	14	37	14	14	507	54.3	9.04	118.34	14	0	5464.3	4794.9	4392.5	2255.7	2903.6	1785.2	2481.6	2306.2	2322.9	4924.6	3343.1	7257.2	5314.5	4819.1	2865.4	2611	5369.7	3258.8	4391.8	3215.9	3464.8	1599	865	519.3	438.8	701.3	353	421.6	423.2	1573.2	1612	7257.2
FALSE	High	Master Protein	P30115	Glutathione S-transferase A3 OS=Mus musculus OX=10090 GN=Gsta3 PE=1 SV=2	0	61.191	43	11	82	7	7	221	25.3	8.73	247.67	11	4	10994.6	10483.8	7912.6	2371.7	5039.5	2041.3	1436.2	1675.5	1969.4	7387.3	8009.5	16636.7	9998.6	6763.8	3223.6	1791.2	8643.7	1703.9	2336.4	1721.9	6971.5	3496.1	1558.2	546	761.6	801.9	204.3	306.3	358.8	2359.9	3862.1	16636.7
FALSE	High	Master Protein	P00920	Carbonic anhydrase 2 OS=Mus musculus OX=10090 GN=Ca2 PE=1 SV=4	0	61.12	53	10	35	10	10	260	29	7.01	104.59	10	0	2640	2692.2	1262.4	5520.8	1733.7	2888.5	3251.4	2670.6	3949.3	2145.5	2585.9	908.4	2053.6	1845	3430.3	3638	1299.3	2352.6	3801.3	3229.3	1674	897.8	248.6	1271	262	1134.7	462.5	488.2	719.5	685.4	1246.9	908.4
FALSE	High	Master Protein	P05202	Aspartate aminotransferase, mitochondrial OS=Mus musculus OX=10090 GN=Got2 PE=1 SV=1	0	60.885	37	17	36	16	17	430	47.4	9	99.79	17	0	3072.9	2809.2	2321.2	1402.6	2628.3	1249.4	1182.5	1084.2	1452.4	2653.3	1746.6	3619.8	3838.6	3702.3	1441.6	1519.7	3941.5	1461.9	1678.7	1347.8	1948.5	936.8	457.1	322.9	397.2	490.8	168.2	198.2	264.6	847.6	842.2	3619.8
FALSE	High	Master Protein	Q922F4	Tubulin beta-6 chain OS=Mus musculus OX=10090 GN=Tubb6 PE=1 SV=1	0	60.765	23	10	49	1	1	447	50.1	4.89	125.63	10	0	64.7	26.1	23.4	105.1	46.3	36.7	64	74.9	49.9	86.7	81.3	50.5	29.1	41.6	144	43.1	57.8	78.4	146.1	176.1	41	8.7	4.6	24.2	7	14.4	9.1	13.7	9.1	27.7	39.2	50.5
FALSE	High	Master Protein	P61222	ATP-binding cassette sub-family E member 1 OS=Mus musculus OX=10090 GN=Abce1 PE=1 SV=1	0	60.667	25	16	30	16	16	599	67.3	8.34	80.66	16	0	1916.9	1684.7	1442.7	1827	1375	765.7	693.2	672.8	752.5	2677.7	1367.1	3758	2596.5	2497.3	3387.3	1593.4	3020.6	1840.9	3431.6	1565.2	1215.5	561.8	284.1	420.6	207.8	300.8	98.6	123	137.1	855.4	659.2	3758
FALSE	High	Master Protein	P35242	Pulmonary surfactant-associated protein A OS=Mus musculus OX=10090 GN=Sftpa1 PE=1 SV=1	0	60.58	31	6	40	6	6	248	26.1	5.43	120.19	6	0	1866.2	2266.1	3338.3	1664.9	6278.9	1549	2244.7	1521.8	2163.7	1325.7	1921	1129.6	2046.6	2405.9	758	1910.2	2235.8	994.1	727.5	594.6	1183.3	755.7	657.4	383.3	948.9	608.5	319.3	278.2	394.2	423.5	926.3	1129.6
FALSE	High	Master Protein	P09581	Macrophage colony-stimulating factor 1 receptor OS=Mus musculus OX=10090 GN=Csf1r PE=1 SV=3	0	60.53	14	11	30	11	11	977	109.1	6.21	104.22	11	0	1828	2446.4	3345.4	3794.2	3861	7039.7	3717.5	4071.5	3551.3	4583.7	3437.9	2633.5	3819.2	3225.5	4981.3	7905.9	4277.2	4893	4444.3	4584.9	1159.1	815.8	658.8	873.5	583.5	2765.4	528.8	744.3	647	1464.3	1657.7	2633.5
FALSE	High	Master Protein	A2ARV4	Low-density lipoprotein receptor-related protein 2 OS=Mus musculus OX=10090 GN=Lrp2 PE=1 SV=1	0	60.491	4	24	33	24	24	4660	518.9	5.15	70.27	24	0	1794.6	2024.7	1994.6	1469.5	3605.6	2078	1107.2	1017.5	1824	1326.6	1747.2	1577.6	1846.2	1992.8	1213	1611	1907.4	1382.6	1348.9	724	1137.9	675.2	392.8	338.3	544.9	816.3	157.5	186	332.3	423.8	842.5	1577.6
FALSE	High	Master Protein	Q61398	Procollagen C-endopeptidase enhancer 1 OS=Mus musculus OX=10090 GN=Pcolce PE=1 SV=2	0	60.322	33	11	25	11	11	468	50.1	8.41	81.53	11	0	248.5	251.6	302.6	546.4	296.4	818.4	3198.7	4533.2	1755.3	1242.1	962.9	342.1	462.3	974.8	865.1	940.2	417.8	4162.5	3699.9	2042.9	157.6	83.9	59.6	125.8	44.8	321.5	455	828.7	319.8	396.8	464.3	342.1
FALSE	High	Master Protein	Q9EQP2	EH domain-containing protein 4 OS=Mus musculus OX=10090 GN=Ehd4 PE=1 SV=1	0	60.137	26	16	27	12	13	541	61.4	6.76	83.02	16	3	3317.4	2740.5	2328.8	4854.9	1991.1	1297.5	1966.3	1538.8	1671.4	2177.8	2279	2593	1937.8	1742.2	3353.2	1159.9	2277.5	1564.4	1552.9	1546.6	2103.5	913.9	458.6	1117.7	300.9	509.7	279.7	281.3	304.5	695.7	1098.9	2593
FALSE	High	Master Protein	P50247	Adenosylhomocysteinase OS=Mus musculus OX=10090 GN=Ahcy PE=1 SV=3	0	59.938	35	16	32	16	16	432	47.7	6.54	90.33	16	0	5252.8	4565.5	6746.1	3223	3229.8	2121.8	2613.1	2550.2	2604.5	3601.4	3396.4	3664.8	4629.9	4312.2	3121.2	1840.9	3162.9	2292.3	3319	3856.8	3330.7	1522.5	1328.5	742	488.1	833.5	371.7	466.2	474.5	1150.5	1637.7	3664.8
FALSE	High	Master Protein	P08607	C4b-binding protein OS=Mus musculus OX=10090 GN=C4bpa PE=1 SV=3	0	59.903	29	12	29	12	12	469	51.5	7.15	98.47	12	0	508.6	699.3	703.8	1385.6	1363.1	3526.5	7333	6183.5	5965.9	4427.5	2449.2	692.5	1433.2	1108.7	5672.4	5800.8	1801.6	7247.3	10527.4	9101	322.5	233.2	138.6	319	206	1385.3	1043.1	1130.4	1086.9	1414.4	1181	692.5
FALSE	High	Master Protein	Q9QWK4	CD5 antigen-like OS=Mus musculus OX=10090 GN=Cd5l PE=1 SV=3	0	59.869	43	15	36	15	15	352	38.8	5.16	97.96	15	0	752.4	1246.3	1075	2172.7	2253.1	4333.4	4809.2	5738.8	3448.1	3344.4	2477.2	1347.8	1822	2001	8225.1	9289.8	2949.1	7077.6	4998.5	3766.1	477.1	415.6	211.7	500.2	340.5	1702.3	684.1	1049.1	628.2	1068.4	1194.5	1347.8
FALSE	High	Master Protein	Q8QZR5	Alanine aminotransferase 1 OS=Mus musculus OX=10090 GN=Gpt PE=1 SV=3	0	59.7	33	14	27	13	14	496	55.1	6.64	82.72	14	0	2503.3	2554.6	2491.8	1176.7	2001.7	898.1	749.4	754.9	857.9	3637.4	1848.2	5072.6	3249.9	2424.7	2332.9	2546	3733.4	1549.7	6452.2	935.3	1587.3	851.9	490.7	270.9	302.5	352.8	106.6	138	156.3	1162	891.2	5072.6
FALSE	High	Master Protein	Q9D7Z6	Calcium-activated chloride channel regulator 1 OS=Mus musculus OX=10090 GN=Clca1 PE=1 SV=2	0	59.67	19	17	29	17	17	913	100	6.01	81.92	17	0	466.5	552.4	1161.8	670.7	1313.5	2682.1	338.8	384	505	2916.5	1082.4	1523.1	2687.2	42586	1315.4	2248.9	2019.4	1083.7	4749	661	295.8	184.2	228.8	154.4	198.5	1053.6	48.2	70.2	92	931.7	521.9	1523.1
FALSE	High	Master Protein	P15105	Glutamine synthetase OS=Mus musculus OX=10090 GN=Glul PE=1 SV=6	0	59.668	42	13	31	13	13	373	42.1	7.08	97.62	13	0	6802.7	6354	4375.2	2415.5	2646.8	1304.9	1178.2	937.6	1266.3	2295.5	4578.1	3931.8	2778.8	1686.7	1725.9	849.6	3098.9	779.6	1130.8	690	4313.5	2118.9	861.6	556.1	400	512.6	167.6	171.4	230.7	733.3	2207.5	3931.8
FALSE	High	Master Protein	Q80W21	Glutathione S-transferase Mu 7 OS=Mus musculus OX=10090 GN=Gstm7 PE=1 SV=1	0	59.497	39	10	53	1	1	218	25.7	6.8	160.13	10	0
FALSE	High	Master Protein	Q8CIN4	Serine/threonine-protein kinase PAK 2 OS=Mus musculus OX=10090 GN=Pak2 PE=1 SV=1	0	59.115	31	13	20	8	10	524	57.9	5.77	70.22	13	3	972.1	877.7	813.5	670.7	725.2	504.3	513.9	510.4	480.8	1338.8	788.1	2174.6	1591.3	1287.4	1168.1	721.2	1477.1	617.7	960.3	887.2	616.4	292.7	160.2	154.4	109.6	198.1	73.1	93.3	87.6	427.7	380	2174.6
FALSE	High	Master Protein	Q5I2A0	Serine protease inhibitor A3G OS=Mus musculus OX=10090 GN=Serpina3g PE=1 SV=2	0	59.022	15	7	59	1	2	440	49	6.46	219.61	7	0	146.5	49.5	46.7	58.2	93.3	49.6	62.6	67.8	356.8		65.5										92.9	16.5	9.2	13.4	14.1	19.5	8.9	12.4	65		31.6
FALSE	High	Master Protein	O88307	Sortilin-related receptor OS=Mus musculus OX=10090 GN=Sorl1 PE=1 SV=3	0	58.917	8	18	25	18	18	2215	246.9	5.54	60.15	18	0	1531.3	1516.2	1633.6	1821.7	2100.9	1987.1	1405.3	1453.4	1573.1	1671	1432.8	1349.1	1468.9	1690.7	1814.8	1862.8	1886.9	2059.7	1455.1	1353.3	971	505.6	321.7	419.4	317.5	780.6	199.9	265.7	286.6	533.8	690.9	1349.1
FALSE	High	Master Protein	Q9JJN5	Carboxypeptidase N catalytic chain OS=Mus musculus OX=10090 GN=Cpn1 PE=1 SV=1	0	58.908	31	12	25	12	12	457	51.8	8.28	85.44	12	0	583.2	1011.5	792.7	1833.5	979.3	4451.3	3579	4301.2	3895.5	1938.6	2341	401.4	947.5	747.8	3218	3989.1	983.1	2967.7	2970.3	3647.3	369.8	337.3	156.1	422.1	148	1748.6	509.1	786.3	709.7	619.3	1128.8	401.4
FALSE	High	Master Protein	Q7TMY8	E3 ubiquitin-protein ligase HUWE1 OS=Mus musculus OX=10090 GN=Huwe1 PE=1 SV=5	0	58.733	4	19	27	19	19	4377	482.3	5.22	68.06	19	0	1067.5	938	922.2	1007.3	1059.4	687.1	636.2	623.6	733.9	1268.7	844.9	1397	1239.5	1412.4	1624.9	756.2	1371.9	864	2328.7	1278.7	676.9	312.8	181.6	231.9	160.1	269.9	90.5	114	133.7	405.3	407.4	1397
FALSE	High	Master Protein	P08730	Keratin, type I cytoskeletal 13 OS=Mus musculus OX=10090 GN=Krt13 PE=1 SV=2	0	58.504	26	17	47	5	5	437	47.7	4.86	120.21	17	8	644.9	1172.2	3239.3	933.9	1165.9	1120.3	1989.5	3385.5	1451.8	3624	1396.3	2242.8	2406.7	5899.2	1944.7	9383.3	2805.7	4718.1	4751.1	1055	408.9	390.9	637.9	215	176.2	440.1	283	618.9	264.5	1157.7	673.3	2242.8
FALSE	High	Master Protein	Q7TNG5	Echinoderm microtubule-associated protein-like 2 OS=Mus musculus OX=10090 GN=Eml2 PE=1 SV=1	0	58.501	24	14	30	14	14	649	70.7	6.28	95.16	14	0	9190.1	8605.4	6913.2	8032.8	6965.8	3349.8	2346.6	1899.8	4886.2	2990.7	5684.5	4164.3	3701.2	4550.5	3248.4	1097.8	3124.3	1246.5	1601.9	1516.7	5827.3	2869.7	1361.4	1849.3	1052.7	1315.9	333.8	347.3	890.2	955.4	2741	4164.3
FALSE	High	Master Protein	P68040	Receptor of activated protein C kinase 1 OS=Mus musculus OX=10090 GN=Rack1 PE=1 SV=3	0	58.4	44	13	22	13	13	317	35.1	7.69	79.2	13	0	6085.8	5937.5	4886.1	3170.9	4211.1	1903.9	1673.9	1618.1	1582.4	3454	3550.9	4945.5	3576.2	4215	2631.2	1472.3	4754.6	1472.2	1511.7	2172.7	3858.9	1980	962.2	730	636.4	747.9	238.1	295.8	288.3	1103.4	1712.2	4945.5
FALSE	High	Master Protein	Q99K85	Phosphoserine aminotransferase OS=Mus musculus OX=10090 GN=Psat1 PE=1 SV=1	0	58.337	35	12	22	12	12	370	40.4	8.03	64	12	0	1134.6	1170.4	1132.4	2451.1	1555.7	1199.8	1247.1	1278.9	1209.8	639.5	1315.5	638.2	584.7	547.8	824.4	508	517.3	511.7	681.4	655.8	719.4	390.3	223	564.3	235.1	471.3	177.4	233.8	220.4	204.3	634.3	638.2
FALSE	High	Master Protein	P70296	Phosphatidylethanolamine-binding protein 1 OS=Mus musculus OX=10090 GN=Pebp1 PE=1 SV=3	0	58.327	68	7	21	7	7	187	20.8	5.4	88.38	7	0	3068.4	3421.5	2599.9	2756.1	1654.3	407.3	638.3	557.4	541.2	1330.1	2150.2	2256.1	1819.8	1519.3	958.6	559.9	1210.9	639.2	958.2	539.3	1945.6	1141	512	634.5	250	160	90.8	101.9	98.6	424.9	1036.8	2256.1
FALSE	High	Master Protein	Q8BFR5	Elongation factor Tu, mitochondrial OS=Mus musculus OX=10090 GN=Tufm PE=1 SV=1	0	58.179	35	14	26	14	14	452	49.5	7.56	82.66	14	0	4036.8	3056.3	3130.6	1292.2	1832.3	1315.1	1051	1091.9	1186.7	4493.6	2167	4793.9	4448.9	3529.2	2584	4176.7	4097	3633.5	3243.6	3800.5	2559.7	1019.2	616.5	297.5	276.9	516.6	149.5	199.6	216.2	1435.5	1044.9	4793.9
FALSE	High	Master Protein	Q8VCG4	Complement component C8 gamma chain OS=Mus musculus OX=10090 GN=C8g PE=1 SV=1	0	58.157	51	9	28	9	9	202	22.5	9.25	97.56	9	0	1252.7	1574.6	1657.5	1961.2	2014.2	4876.6	1642.9	1659.1	1904.6	2707.7	2105.6	1474	2180.4	2081	5578	5084	2437.4	2549	2035.2	2540.2	794.3	525.1	326.4	451.5	304.4	1915.7	233.7	303.3	347	865	1015.3	1474
FALSE	High	Master Protein	Q9Z1T2	Thrombospondin-4 OS=Mus musculus OX=10090 GN=Thbs4 PE=1 SV=1	0	58.145	18	15	29	13	13	963	106.3	4.67	94.73	15	2	989.9	986.9	1074.5	1916	2015.5	5451.4	1268.9	1293.2	1183.4	2659.2	1954.6	1012.7	1237.3	1314.4	4553	16680.4	1305	3276	1370.5	1043.4	627.7	329.1	211.6	441.1	304.6	2141.5	180.5	236.4	215.6	849.5	942.5	1012.7
FALSE	High	Master Protein	Q9Z1Q5	Chloride intracellular channel protein 1 OS=Mus musculus OX=10090 GN=Clic1 PE=1 SV=3	0	58.127	45	10	30	10	10	241	27	5.17	97.47	10	0	6330.1	5789	4489.5	5473.1	4738.5	2284.7	2189.9	1737.9	1844.3	3041.1	4577.4	5401.2	3772.1	3625.6	3345.7	1252.6	3925.4	1554.9	1789.9	1590.4	4013.8	1930.5	884.1	1260	716.1	897.5	311.5	317.7	336	971.5	2207.2	5401.2
FALSE	High	Master Protein	P50431	Serine hydroxymethyltransferase, cytosolic OS=Mus musculus OX=10090 GN=Shmt1 PE=1 SV=3	0	58.102	32	15	25	15	15	478	52.6	6.95	72.35	15	0	2358.2	2476	1848.9	943.4	1267.8	709	703	649.9	716.8	1392.7	1617	2333.2	1512	1476.8	1198.5	699.3	1695.4	771	802.3	639.7	1495.3	825.7	364.1	217.2	191.6	278.5	100	118.8	130.6	444.9	779.7	2333.2
FALSE	High	Master Protein	Q62167	ATP-dependent RNA helicase DDX3X OS=Mus musculus OX=10090 GN=Ddx3x PE=1 SV=3	0	58.057	24	17	29	3	17	662	73.1	7.18	76.35	17	0	3562.1	2899.8	2771.6	3301.2	3177.5	1694.1	1794.1	1611.5	1720.2	2345.6	2545.9	3007.3	2584.2	2748	2331	1382.5	2721.5	1663.4	1747.2	1606.5	2258.7	967	545.8	760	480.2	665.5	255.2	294.6	313.4	749.3	1227.6	3007.3
FALSE	High	Master Protein	A3KMP2	Tetratricopeptide repeat protein 38 OS=Mus musculus OX=10090 GN=Ttc38 PE=1 SV=2	0	58.001	32	14	25	14	14	465	52.2	6.3	70.78	14	0	2732.6	3047	2268.3	3574.4	2089.7	1355	1021.5	757.1	996.8	1739.5	2411.3	2908.7	2242.9	2014.8	1716.6	1073.7	2401.1	864	1076.3	1067.9	1732.7	1016.1	446.7	822.9	315.8	532.3	145.3	138.4	181.6	555.7	1162.7	2908.7
FALSE	High	Master Protein	P50405	Pulmonary surfactant-associated protein B OS=Mus musculus OX=10090 GN=Sftpb PE=1 SV=1	0	57.701	27	9	36	9	9	377	41.7	6.2	119.08	9	0	8729.6	6508.4	6412	5166.8	6398.7	3120.4	6965.4	8655.5	7331	5917.3	5612.9	8717.9	6366	5260.8	2819.6	3424.8	10138.2	5679.5	4393.2	2408.3	5535.3	2170.4	1262.7	1189.5	967	1225.8	990.8	1582.3	1335.6	1890.3	2706.5	8717.9
FALSE	High	Master Protein	Q9WTM5	RuvB-like 2 OS=Mus musculus OX=10090 GN=Ruvbl2 PE=1 SV=3	0	57.699	34	15	24	15	15	463	51.1	5.64	70.23	15	0	2542.7	1789.6	2365.8	1506	2525.1	1074	831	792.1	1050	1639.7	1637.5	2213.5	2110	3159.4	1372.9	845.3	1922.2	902.8	831.7	1017.1	1612.3	596.8	465.9	346.7	381.6	421.9	118.2	144.8	191.3	523.8	789.6	2213.5
FALSE	High	Master Protein	P58871	182 kDa tankyrase-1-binding protein OS=Mus musculus OX=10090 GN=Tnks1bp1 PE=1 SV=2	0	57.598	11	18	26	18	18	1720	181.7	4.88	65.41	18	0	1097.5	971.6	1101.9	1059.9	858.2	460	576.5	561.2	483.6	1363.6	792.2	1751.3	1361.4	1738.1	2063.5	883.2	1430.7	1030.3	1395.7	961.8	695.9	324	217	244	129.7	180.7	82	102.6	88.1	435.6	382	1751.3
FALSE	High	Master Protein	Q8BGZ7	Keratin, type II cytoskeletal 75 OS=Mus musculus OX=10090 GN=Krt75 PE=1 SV=1	0	57.522	18	13	41	1	1	551	59.7	8.31	119.43	13	0	311.5	631.8	1167.9	475.2	725.2	685.5	2192	2148.7	1339.8	578.8	648.7	230.6	357.5	1516	337.6	1946	326.8	1602.3	647.2	161.4	197.5	210.7	230	109.4	109.6	269.3	311.8	392.8	244.1	184.9	312.8	230.6
FALSE	High	Master Protein	Q60675	Laminin subunit alpha-2 OS=Mus musculus OX=10090 GN=Lama2 PE=1 SV=2	0	57.49	6	21	30	20	21	3118	343.6	6.09	66.7	21	0	446.9	517.9	667.8	1139.4	833.1	1291.4	3051	3003.1	2695.6	2418.5	1417.1	791	987.6	1279.3	2288	2453.3	960.6	7754.7	6585.7	5059.1	283.4	172.7	131.5	262.3	125.9	507.3	434	549	491.1	772.6	683.3	791
FALSE	High	Master Protein	P47856	Glutamine--fructose-6-phosphate aminotransferase [isomerizing] 1 OS=Mus musculus OX=10090 GN=Gfpt1 PE=1 SV=3	0	57.314	24	16	24	14	16	697	78.5	6.84	72.34	16	0	2015.8	1762	1621.4	2324.3	1600.7	983.4	964.5	787.7	941.9	2209.7	1587.5	2510.1	2028.9	2005	3488.3	1185.4	2065.7	1620.4	1425.7	1456	1278.2	587.6	319.3	535.1	241.9	386.3	137.2	144	171.6	705.9	765.5	2510.1
FALSE	High	Master Protein	P20060	Beta-hexosaminidase subunit beta OS=Mus musculus OX=10090 GN=Hexb PE=1 SV=2	0	57.242	30	17	30	17	17	536	61.1	8.12	89.05	17	0	2821.4	2438.3	2420.2	4842.3	3711.5	3800.4	3055.3	2575.4	2702.7	3734.5	3122.4	4382.5	3347.2	3327.6	3947.9	4835.8	4740.1	3445.8	2142.1	2400.6	1789	813.1	476.6	1114.8	560.9	1492.9	434.6	470.8	492.4	1193	1505.6	4382.5
FALSE	High	Master Protein	P11352	Glutathione peroxidase 1 OS=Mus musculus OX=10090 GN=Gpx1 PE=1 SV=2	0	57.24	60	11	37	11	11	201	22.3	7.21	116.61	11	0	4520.9	4480.7	3456.6	2947.6	4027.1	1570.1	1891.1	1686.5	1613.7	2029.4	3337.5	2521.7	2858.1	2478.6	1689	1085.4	2448.3	1194	1400.6	1451.9	2866.6	1494.2	680.7	678.6	608.6	616.8	269	308.3	294	648.3	1609.3	2521.7
FALSE	High	Master Protein	Q8R146	Acylamino-acid-releasing enzyme OS=Mus musculus OX=10090 GN=Apeh PE=1 SV=3	0	57.236	21	14	24	14	14	732	81.5	5.59	77.05	14	0	3120.2	3163.3	2865.5	1618.5	2212.1	1177.1	814.1	777.3	926	1547	2057.3	1921.8	2750.6	2527.5	654.2	589.1	1330.7	505.7	763.2	954.6	1978.5	1054.9	564.3	372.6	334.3	462.4	115.8	142.1	168.7	494.2	992	1921.8
FALSE	High	Master Protein	Q9WVK4	EH domain-containing protein 1 OS=Mus musculus OX=10090 GN=Ehd1 PE=1 SV=1	0	57.232	27	16	29	7	12	534	60.6	6.83	85.91	16	1	3343.9	2522.5	2781.7	9152.2	2274.3	1472.9	3029.9	2030	2113.2	1215.2	2529.1	1124.4	991.1	1294	3241.9	605.1	1015.5	892.4	1028.1	1053.2	2120.3	841.2	547.8	2107	343.7	578.6	431	371.1	385	388.2	1219.5	1124.4
FALSE	High	Master Protein	Q921M7	CYFIP-related Rac1 interactor B OS=Mus musculus OX=10090 GN=Cyrib PE=1 SV=1	0	57.185	42	12	29	11	11	324	36.8	6.06	97.39	12	1	2485.9	2127.9	1572.7	2552.8	2200.2	1414.1	1520.6	1284.4	1090.6	2186.8	2313.2	3193	2006.1	1942.2	1263	931.4	2531.8	722.7	1117.5	2039.7	1576.3	709.6	309.7	587.7	332.5	555.5	216.3	234.8	198.7	698.6	1115.4	3193
FALSE	High	Master Protein	Q61035	Histidine--tRNA ligase, cytoplasmic OS=Mus musculus OX=10090 GN=Hars1 PE=1 SV=2	0	57.183	32	17	32	14	17	509	57.4	6	90.74	17	0	2698.4	2598.7	1912.9	2993.7	1860	1412.6	1668.2	1440.9	1387.6	2757.2	2373.1	3912.7	2475.4	2065.5	2713.5	1862.8	3059.2	1803.9	2578.2	2173.6	1711	866.6	376.7	689.2	281.1	554.9	237.3	263.4	252.8	880.8	1144.3	3912.7
FALSE	High	Master Protein	Q8BL66	Early endosome antigen 1 OS=Mus musculus OX=10090 GN=Eea1 PE=1 SV=2	0	57.062	12	19	26	19	19	1411	160.8	5.77	68.27	19	0	1170.2	967.1	1354.8	934.3	1230.8	819.9	833.8	820	761.9	1956.8	892.8	2596.8	1866.5	2880.2	2356.2	1229.2	2349.3	1351.6	1392.2	1420.4	742	322.5	266.8	215.1	186	322.1	118.6	149.9	138.8	625.1	430.5	2596.8
FALSE	High	Master Protein	Q9Z2I8	Succinate--CoA ligase [GDP-forming] subunit beta, mitochondrial OS=Mus musculus OX=10090 GN=Suclg2 PE=1 SV=3	0	56.972	34	15	24	15	15	433	46.8	7.02	73.47	15	0	2919.8	2433.2	2471	800.5	1600.7	786.9	578.6	596.8	829.4	1097.2	1652.3	2195.6	1430.6	1545.4	506.4	410.2	1553.3	388.5	532.6	321.9	1851.4	811.4	486.6	184.3	241.9	309.1	82.3	109.1	151.1	350.5	796.7	2195.6
FALSE	High	Master Protein	Q61592	Growth arrest-specific protein 6 OS=Mus musculus OX=10090 GN=Gas6 PE=2 SV=2	0	56.949	22	13	26	13	13	674	74.6	5.52	80.76	13	0	3935.3	3649.1	3958.8	2781.3	4316.3	2135.8	1335.7	1328.7	1602.2	1363.6	2646.1	1778.4	1962	1939.7	854.3	1245.3	2510.5	937.2	1305.5	668.3	2495.3	1216.9	779.6	640.3	652.3	839	190	242.9	291.9	435.6	1275.9	1778.4
FALSE	High	Master Protein	Q9Z0S1	3'(2'),5'-bisphosphate nucleotidase 1 OS=Mus musculus OX=10090 GN=Bpnt1 PE=1 SV=2	0	56.738	57	14	20	14	14	308	33.2	5.82	63.39	14	0	2112.8	2011.8	1523.9	1691.9	1189.1	449.6	508.3	522.4	546.7	2504.6	1259	3695.6	4724.5	4288.5	1683.8	1192	2476.3	1349.9	1373.3	1087.4	1339.7	670.9	300.1	389.5	179.7	176.6	72.3	95.5	99.6	800.1	607.1	3695.6
FALSE	High	Master Protein	Q8BK62	Olfactomedin-like protein 3 OS=Mus musculus OX=10090 GN=Olfml3 PE=2 SV=2	0	56.687	40	14	29	14	14	406	45.7	6.23	86.97	14	0	851.5	904.7	3448.5	1785.3	2239.2	4484.9	3365.3	3820.9	3321.3	1874.1	1819.4	503.8	689.1	724.1	2892.6	3373.7	747.8	6712.3	3753.8	2327.1	539.9	301.7	679.1	411	338.4	1761.8	478.7	698.5	605.1	598.7	877.3	503.8
FALSE	High	Master Protein	P58774	Tropomyosin beta chain OS=Mus musculus OX=10090 GN=Tpm2 PE=1 SV=1	0	56.605	36	14	30	5	5	284	32.8	4.7	75.28	14	0	641.7	488.5	608.3	1303.1	901.9	562.8	1466.5	1141.6	1519.3	577.2	590	209.4	312.6	586.2	1490.2	1067.9	583.7	1614.3	1799	1043	406.9	162.9	119.8	300	136.3	221.1	208.6	208.7	276.8	184.4	284.5	209.4
FALSE	High	Master Protein	P43274	Histone H1.4 OS=Mus musculus OX=10090 GN=H1-4 PE=1 SV=2	0	56.571	38	12	41	3	3	219	22	11.11	120.04	12	0	344.4	225.8	160	288	324.2	143.3	440.1	294.3	276.6	1483.8	294.1	3365.6	1844.9	1618.9	1057.7	1192.7	2798.2	869.2	1877.9	726.7	218.4	75.3	31.5	66.3	49	56.3	62.6	53.8	50.4	474	141.8	3365.6
FALSE	High	Master Protein	O70435	Proteasome subunit alpha type-3 OS=Mus musculus OX=10090 GN=Psma3 PE=1 SV=3	0	56.521	35	11	23	11	11	255	28.4	5.44	71.73	11	0	2093.3	2834.7	2271.4	1622.4	2072.5	1274.8	2025.4	1463.8	1504	1504.8	1825.8	1710.4	2178.2	1495.6	1133	1206.6	1647.4	1156	1351.7	1872.2	1327.3	945.3	447.3	373.5	313.2	500.8	288.1	267.6	274	480.7	880.4	1710.4
FALSE	High	Master Protein	Q6IFX2	Keratin, type I cytoskeletal 42 OS=Mus musculus OX=10090 GN=Krt42 PE=1 SV=1	0	56.328	25	14	33	6	7	452	50.1	5.16	96.24	14	1	899.1	1252.6	2805.1	2820.4	1692.6	1628.9	4421.9	3650.8	3662.7	3484.7	1750.6	1898.7	2088.8	11147	4254.2	7519.7	1981.3	7550.5	3533.6	1531.7	570.1	417.7	552.4	649.3	255.8	639.9	629	667.4	667.3	1113.2	844.1	1898.7
FALSE	High	Master Protein	Q91WU5	Arsenite methyltransferase OS=Mus musculus OX=10090 GN=As3mt PE=1 SV=2	0	56.278	47	16	30	16	16	376	41.8	5.86	89.98	16	0	2859.6	2536.6	2202.3	3106.2	1892.5	1246.8	1062.9	893.3	1080.2	2196.6	2238.7	3458	2868.2	2152.8	2020.5	924.1	2164.5	1105.2	1287.4	1024.1	1813.2	845.9	433.7	715.1	286	489.8	151.2	163.3	196.8	701.7	1079.5	3458
FALSE	High	Master Protein	Q8R121	Protein Z-dependent protease inhibitor OS=Mus musculus OX=10090 GN=Serpina10 PE=1 SV=1	0	55.966	20	10	30	10	10	448	51.8	5.67	100.42	10	0	890.3	1149.1	1429	1728.4	1504.1	2806.8	2894.3	2871.9	2485.9	3720.1	1825.8	1934.6	2845.3	3337.4	4971	5783.2	3134.9	4471.7	4428.2	4891.1	564.5	383.2	281.4	397.9	227.3	1102.6	411.7	525	452.9	1188.4	880.4	1934.6
FALSE	High	Master Protein	Q9JKR6	Hypoxia up-regulated protein 1 OS=Mus musculus OX=10090 GN=Hyou1 PE=1 SV=1	0	55.882	18	18	27	18	18	999	111.1	5.19	68.39	18	0	4256.4	3213.1	2761.4	1886.5	2347.1	1602.5	1498.1	1362.6	1584.6	1938.3	2541.7	3071.9	2197.6	2558.6	1523	1115.3	2501.7	1015.6	1298.5	1276.2	2698.9	1071.5	543.8	434.3	354.7	629.5	213.1	249.1	288.7	619.2	1225.6	3071.9
FALSE	High	Master Protein	P05063	Fructose-bisphosphate aldolase C OS=Mus musculus OX=10090 GN=Aldoc PE=1 SV=4	0	55.778	34	11	19	7	7	363	39.4	7.12	60.45	11	0	739	746.7	916.6	470.9	758.3	433.5	362	322.7	342.5	309.9	581.3	474.4	454.4	616.4	225.4	286.1	578	220.5	256.5	222.1	468.6	249	180.5	108.4	114.6	170.3	51.5	59	62.4	99	280.3	474.4
FALSE	High	Master Protein	Q60605	Myosin light polypeptide 6 OS=Mus musculus OX=10090 GN=Myl6 PE=1 SV=3	0	55.764	60	9	32	7	8	151	16.9	4.65	91.5	9	2	3497	3225.7	2775.6	4602.1	2727.5	1844.3	2400.1	2226.4	1854.1	2386.3	2956.3	3394.1	2902.1	2207.5	3430.8	1319.7	2809.6	2269	1697.6	1671.5	2217.4	1075.7	546.6	1059.5	412.2	724.5	341.4	407	337.8	762.3	1425.5	3394.1
FALSE	High	Master Protein	P06330	Ig heavy chain V region AC38 205.12 OS=Mus musculus OX=10090 PE=1 SV=1	0	55.753	72	6	36	3	5	118	12.9	7.11	121.79	6	1	1725.2	2560.9	5553.8	3212.6	3292	4912.5	6181.5	8239.2	7973.2	4408.1	4165	1302.2	1655.6	2032	10718.8	9455.5	5023.9	10359.7	6474.5	5773.6	1093.9	854	1093.7	739.6	497.5	1929.8	879.3	1506.2	1452.6	1408.2	2008.3	1302.2
FALSE	High	Master Protein	P19157	Glutathione S-transferase P 1 OS=Mus musculus OX=10090 GN=Gstp1 PE=1 SV=2	0	55.694	48	7	29	2	7	210	23.6	7.87	106.2	7	0	3328.4	4093.8	3514.5	1423.9	1813.7	813.1	725.5	543.2	770.1	1597.4	2390.8	2319.4	2368	2139.8	995.1	624.8	2050.2	634	780.7	806.1	2110.5	1365.2	692.1	327.8	274.1	319.4	103.2	99.3	140.3	510.3	1152.8	2319.4
FALSE	High	Master Protein	P39054	Dynamin-2 OS=Mus musculus OX=10090 GN=Dnm2 PE=1 SV=2	0	55.634	20	20	31	9	20	870	98.1	7.43	71.85	20	0	2586.6	2230.1	2120.6	3488.4	2294.8	1583.6	1499.5	1376.3	1355.8	2165.3	2094	2907.9	2077.4	2124.2	5109.9	1108	2546.3	1395.5	1362.1	1351.9	1640.1	743.7	417.6	803.1	346.8	622.1	213.3	251.6	247	691.7	1009.7	2907.9
FALSE	High	Master Protein	P17742	Peptidyl-prolyl cis-trans isomerase A OS=Mus musculus OX=10090 GN=Ppia PE=1 SV=2	0	55.559	48	10	58	9	9	164	18	7.9	138.99	10	0	9591.6	8718.8	9332.4	7602.3	5630.4	3539.7	2817.6	2503.2	2634.7	4502.7	6982.5	7665.4	5960.5	6265	3088.5	1435.8	5043.3	1770.3	2694.9	1978	6081.9	2907.5	1837.8	1750.2	850.9	1390.5	400.8	457.6	480	1438.4	3366.9	7665.4
FALSE	High	Master Protein	P46412	Glutathione peroxidase 3 OS=Mus musculus OX=10090 GN=Gpx3 PE=1 SV=2	0	55.528	42	9	66	8	8	226	25.4	8.22	188.5	9	2	3104.2	4448.3	4274.7	3966.2	4637.2	6259.9	20007.5	15560.5	17523.3	12184.8	7702.6	4068.9	7039.7	6105.8	8555.7	18500.1	8387.4	16967.7	30258.6	22954	1968.3	1483.4	841.8	913.1	700.8	2459.1	2846	2844.6	3192.5	3892.5	3714.1	4068.9
FALSE	High	Master Protein	P08228	Superoxide dismutase [Cu-Zn] OS=Mus musculus OX=10090 GN=Sod1 PE=1 SV=2	0	55.503	60	10	54	10	10	154	15.9	6.51	185.39	10	0	3678.2	4929.9	5702.1	4197.7	3677.7	1364.2	1383.5	1119.8	1211.4	5387.3	2599.2	7161.7	10419.9	9559.9	2345.9	1918.3	5077	1765.9	2901.8	2483.7	2332.3	1644	1122.9	966.4	555.8	535.9	196.8	204.7	220.7	1721	1253.3	7161.7
FALSE	High	Master Protein	Q9QZE5	Coatomer subunit gamma-1 OS=Mus musculus OX=10090 GN=Copg1 PE=1 SV=1	0	55.341	18	14	20	12	12	874	97.5	5.35	59.15	14	2	1129.7	961.7	1016.1	1261.4	996.5	750.2	838	667.9	680.1	1086.2	978.2	1107.5	908.8	1050.7	1341.1	611	933.6	730.5	980.5	1150.2	716.3	320.7	200.1	290.4	150.6	294.7	119.2	122.1	123.9	347	471.7	1107.5
FALSE	High	Master Protein	Q9D8W5	26S proteasome non-ATPase regulatory subunit 12 OS=Mus musculus OX=10090 GN=Psmd12 PE=1 SV=4	0	55.341	38	17	27	17	17	456	52.9	7.06	70.29	17	0	931.1	819.5	816.5	724.5	1054.1	554.4	486.5	440.9	489.1	2255.1	699.5	2716.6	1919.3	2054	1888.6	1093.4	2380.4	1255.1	1799	2236.9	590.4	273.3	160.8	166.8	159.3	217.8	69.2	80.6	89.1	720.4	337.3	2716.6
FALSE	High	Master Protein	P61750	ADP-ribosylation factor 4 OS=Mus musculus OX=10090 GN=Arf4 PE=1 SV=2	0	55.299	57	8	24	3	3	180	20.4	7.14	86.81	8	0	696.4	786.9	742.9	781.4	655.7	345.4	341.7	330.9	356.8	1317.9	529.7	1577.2	1920.6	1618.1	1959.2	589.1	1518.9	950.2	901.6	642.9	441.6	262.4	146.3	179.9	99.1	135.7	48.6	60.5	65	421	255.4	1577.2
FALSE	High	Master Protein	P97315	Cysteine and glycine-rich protein 1 OS=Mus musculus OX=10090 GN=Csrp1 PE=1 SV=3	0	55.284	55	10	27	9	10	193	20.6	8.57	79.58	10	0	2119.4	1699.1	1217.7	4214.2	1063.4	600.5	940.6	745.6	738.3	2446.4	1539.4	2553.9	2335.8	1908.7	6646	631.4	2119.1	1635	1295	1134.5	1343.9	566.6	239.8	970.2	160.7	235.9	133.8	136.3	134.5	781.5	742.3	2553.9
FALSE	High	Master Protein	Q8BH64	EH domain-containing protein 2 OS=Mus musculus OX=10090 GN=Ehd2 PE=1 SV=1	0	55.226	32	16	24	15	15	543	61.1	6.51	68.29	16	0	516.7	1520.9	475.3	248.9	950.9	550.4	182.1	620.9	293.7	2546.2	1122.6	2433.2	3231.4	2526.7	7694.8	1262.8	2566	2211.3	2098.8	2744	327.6	507.2	93.6	57.3	143.7	216.2	25.9	113.5	53.5	813.4	541.3	2433.2
FALSE	High	Master Protein	P14602	Heat shock protein beta-1 OS=Mus musculus OX=10090 GN=Hspb1 PE=1 SV=3	0	55.2	61	10	32	10	10	209	23	6.55	116.35	10	0	5729.1	6232.5	4751.5	3779.4	3416.4	999.2	1215.5	970.4	1194.9	3117.5	3836.5	5328	3908.2	3879.5	2679.8	890.5	3285	1125	1550.8	1174.7	3632.7	2078.4	935.7	870.1	516.3	392.5	172.9	177.4	217.7	995.9	1849.9	5328
FALSE	High	Master Protein	O55234	Proteasome subunit beta type-5 OS=Mus musculus OX=10090 GN=Psmb5 PE=1 SV=3	0	55.138	41	11	29	11	11	264	28.5	7.02	86.96	11	0	2261.2	2095.5	2054.1	1967.3	1787.9	1476	1365.2	1204.5	1267.9	1193.3	1741.4	1565.4	1307.7	1098.9	1199.4	727	1275	758.9	1309	933.5	1433.8	698.8	404.5	452.9	270.2	579.8	194.2	220.2	231	381.2	839.7	1565.4
FALSE	High	Master Protein	Q61503	5'-nucleotidase OS=Mus musculus OX=10090 GN=Nt5e PE=1 SV=2	0	55.065	23	12	24	12	12	576	63.8	6.64	78.95	12	0	1442.9	1830.7	1673.7	1161.5	2459.6	1428.6	1616.2	1171.7	1842.1	2348.7	1471.4	2587.1	2958.9	3838.7	1963.9	2103.7	3292	1794.4	1652.2	1359.4	914.9	610.5	329.6	267.4	371.7	561.2	229.9	214.2	335.6	750.3	709.5	2587.1
FALSE	High	Master Protein	Q9DC07	LIM zinc-binding domain-containing Nebulette OS=Mus musculus OX=10090 GN=Nebl PE=1 SV=1	0	55.058	42	12	22	12	12	270	31.1	8.31	69.41	12	0	698.6	751.2	551	1052.9	816.5	430.2	421.8	305.2	370.5	1945.8	590.6	2568.5	2964.6	2054	2931.4	635.8	2266.9	1057.8	1294.3	798.8	443	250.5	108.5	242.4	123.4	169	60	55.8	67.5	621.6	284.8	2568.5
FALSE	High	Master Protein	Q9D711	Pirin OS=Mus musculus OX=10090 GN=Pir PE=1 SV=1	0	54.984	38	12	29	12	12	290	32	7.11	73.79	12	0	4373.6	4601.2	4984.6	1420.4	3911.3	1441.8	1304.1	1322.1	1146.6	2390.3	3345.6	4283.7	4229.6	5562	1766.6	1017.5	3677.1	1025.1	1029.5	675.1	2773.2	1534.4	981.6	327	591.1	566.4	185.5	241.7	208.9	763.6	1613.2	4283.7
FALSE	High	Master Protein	Q3UQ44	Ras GTPase-activating-like protein IQGAP2 OS=Mus musculus OX=10090 GN=Iqgap2 PE=1 SV=2	0	54.735	9	17	28	12	12	1575	180.4	5.64	76.26	17	0	2160.9	1799.8	2212.5	820.1	1580.8	783.5	634.1	588	742.1	1224.6	1251.2	1831.8	1457.9	1659.7	971.2	762.8	1398.1	723.6	781.4	662.6	1370.2	600.2	435.7	188.8	238.9	307.8	90.2	107.5	135.2	391.2	603.3	1831.8
FALSE	High	Master Protein	Q99PT1	Rho GDP-dissociation inhibitor 1 OS=Mus musculus OX=10090 GN=Arhgdia PE=1 SV=3	0	54.704	52	11	26	11	11	204	23.4	5.2	78.83	11	0	4518	4485.2	3574.4	8498.4	2778.5	1901.3	1953.6	1455.1	1438.1	3321.6	4346.8	4588.9	8040.1	3464.7	2204.3	901.5	3681.5	1158.6	1785.7	2187.2	2864.8	1495.7	703.9	1956.5	419.9	746.9	277.9	266	262	1061.1	2096	4588.9
FALSE	High	Master Protein	Q8K1M6	Dynamin-1-like protein OS=Mus musculus OX=10090 GN=Dnm1l PE=1 SV=2	0	54.643	22	19	31	19	19	742	82.6	7.05	76.12	19	0	2653	2523.7	2540.5	1780	2339.1	1252.2	1027.8	949.6	1182.3	2176.2	1786.6	2915	2072.5	2422.2	2858	1446.7	2770	1309.4	1875.1	1298.9	1682.2	841.6	500.3	409.8	353.5	491.9	146.2	173.6	215.4	695.2	861.5	2915
FALSE	High	Master Protein	Q3UQ28	Peroxidasin homolog OS=Mus musculus OX=10090 GN=Pxdn PE=1 SV=2	0	54.638	12	18	23	18	18	1475	165	7.14	52.91	18	0	349	392.8	487.5	685	586.9	1398.8	1154.3	1570.5	1170.8	1436.5	889.3	570.2	826.5	1489.1	1493.5	1973.7	733.8	2781.6	2462.9	2750.6	221.3	131	96	157.7	88.7	549.5	164.2	287.1	213.3	458.9	428.8	570.2
FALSE	High	Master Protein	P11247	Myeloperoxidase OS=Mus musculus OX=10090 GN=Mpo PE=1 SV=2	0	54.618	23	16	29	15	16	718	81.1	9.55	76.39	16	0	371.4	435.4	653	560.3	1111.7	673.8	10916.2	12689.8	3512.9	1941.7	1609.3	321.4	505	567.4	666.3	625.6	376.1	2821.2	1755.6	4587.1	235.5	145.2	128.6	129	168	264.7	1552.8	2319.8	640	620.3	776	321.4
FALSE	High	Master Protein	Q61990	Poly(rC)-binding protein 2 OS=Mus musculus OX=10090 GN=Pcbp2 PE=1 SV=1	0	54.558	38	12	25	4	6	362	38.2	6.79	73.87	12	0	766.1	659.4	625.6	540.8	470.5	229.6	205.3	169.6	203.6	191.6	521.2	344.6	291.5	320	227.7	111.7	305.3	86.1	183.1	130.1	485.8	219.9	123.2	124.5	71.1	90.2	29.2	31	37.1	61.2	251.3	344.6
FALSE	High	Master Protein	Q9Z2M7	Phosphomannomutase 2 OS=Mus musculus OX=10090 GN=Pmm2 PE=1 SV=1	0	54.551	46	13	26	11	13	242	27.6	6.42	70.16	13	0	4336.2	4023.4	2992	3162.2	2046	1034.5	861.9	717.1	920.5	3252.7	2758.2	5346.9	4448.5	3888.5	2407.7	1032.1	3456.3	1076.8	2976.6	1319.3	2749.5	1341.7	589.2	728	309.2	406.4	122.6	131.1	167.7	1039.1	1330	5346.9
FALSE	High	Master Protein	P16675	Lysosomal protective protein OS=Mus musculus OX=10090 GN=Ctsa PE=1 SV=1	0	54.512	28	12	27	12	12	474	53.8	5.86	88.2	12	0	1795.3	1719.2	2013.4	1408.7	2183.6	1530.7	927.3	1004.3	1221.3	743.5	1507.7	769.3	966.5	1210.7	642.9	941.6	885.9	661.6	567.5	367.5	1138.4	573.3	396.5	324.3	330	601.3	131.9	183.6	222.5	237.5	727	769.3
FALSE	High	Master Protein	Q9JHH6	Carboxypeptidase B2 OS=Mus musculus OX=10090 GN=Cpb2 PE=1 SV=1	0	54.341	24	12	33	11	12	422	48.8	7.97	102.25	12	0	1907.3	2157.6	2919.4	3262.1	2817.5	4936	8170.3	6825.7	7544.5	4721.8	4025.2	1767.8	2805.2	3630.5	5517.2	6724.1	2805.2	8383.5	6647.9	8575.6	1209.4	719.5	574.9	751	425.8	1939	1162.2	1247.8	1374.5	1508.4	1940.9	1767.8
FALSE	High	Master Protein	P01942	Hemoglobin subunit alpha OS=Mus musculus OX=10090 GN=Hba PE=1 SV=2	0	54.307	49	7	53	6	7	142	15.1	8.22	181.97	7	0	13835.2	13461.5	3204.7	5201.6	3947.7	15681.8	6294	5963.6	5576.2	9706.2	6739.9	3274.1	7764.4	3401.9	4864.4	25373.8	3793	3369.1	7399.2	10190.5	8772.7	4489.1	631.1	1197.5	596.6	6160.3	895.3	1090.2	1015.9	3100.7	3249.9	3274.1
FALSE	High	Master Protein	Q8C7R4	Ubiquitin-like modifier-activating enzyme 6 OS=Mus musculus OX=10090 GN=Uba6 PE=1 SV=1	0	54.299	17	16	20	16	16	1053	117.9	6.11	53.86	16	0	473.4	392.8	331.1	362.3	441.4	247.9	205.3	484.7	200.9	737.8	361.7	1023.6	802.2	725	670.5	564.2	753.5	431.6	896	615.7	300.2	131	65.2	83.4	66.7	97.4	29.2	88.6	36.6	235.7	174.4	1023.6
FALSE	High	Master Protein	Q3TTY5	Keratin, type II cytoskeletal 2 epidermal OS=Mus musculus OX=10090 GN=Krt2 PE=1 SV=1	0	54.165	10	13	54	7	7	707	70.9	8.06	141.05	13	0	1989	5393.8	11586.5	4907.1	4076.8	4324.5	11643.8	19772.6	9030.3	3134.4	4626.2	1066.8	2103.4	5243.7	4145.7	9420.5	1977.9	5961.2	6269.1	1073.6	1261.2	1798.7	2281.7	1129.7	616.1	1698.8	1656.3	3614.6	1645.2	1001.3	2230.7	1066.8
FALSE	High	Master Protein	Q9JJ28	Protein flightless-1 homolog OS=Mus musculus OX=10090 GN=Flii PE=1 SV=1	0	54.161	13	18	27	18	18	1271	144.7	6.06	70.93	18	0	2049.9	1852	1865.2	2163.2	1597.4	1137.9	1233.1	1206.7	1154.3	1347.9	1775.2	1857.4	1273.4	1546.2	1708.6	1019	1601	1014.8	1338.4	1193.7	1299.8	617.6	367.3	498	241.4	447	175.4	220.6	210.3	430.6	856	1857.4
FALSE	High	Master Protein	P24369	Peptidyl-prolyl cis-trans isomerase B OS=Mus musculus OX=10090 GN=Ppib PE=1 SV=2	0	53.918	56	12	30	11	11	216	23.7	9.55	87.34	12	1	5166.8	3719.9	3682.6	1959	3657.9	1596.1	1406.7	1108.3	1329.4	2512.1	3073.3	4606	3272.4	3423.9	1616	1124.8	3841.2	1023.4	1780.8	920.3	3276.2	1240.5	725.2	451	552.8	627	200.1	202.6	242.2	802.5	1481.9	4606
FALSE	High	Master Protein	Q9CQT1	Methylthioribose-1-phosphate isomerase OS=Mus musculus OX=10090 GN=Mri1 PE=1 SV=1	0	53.911	44	13	21	13	13	369	39.4	5.91	62.19	13	0	1027.3	1111.6	859.2	952.1	625.3	351	397.9	298.7	389.2	1210.8	586.1	1819.8	1764.3	1841	1501.9	573	1560.8	748.6	851.3	485.6	651.4	370.7	169.2	219.2	94.5	137.9	56.6	54.6	70.9	386.8	282.6	1819.8
FALSE	High	Master Protein	P05784	Keratin, type I cytoskeletal 18 OS=Mus musculus OX=10090 GN=Krt18 PE=1 SV=5	0	53.895	35	15	38	12	12	423	47.5	5.33	98.32	15	0	770.6	758.1	862.2	920.4	1155.3	1820.6	1136.1	1095.7	1063.7	1194.8	968.5	659.9	871.4	1116	1691.3	1097.8	1014.7	1299.9	1165.1	1489.5	488.6	252.8	169.8	211.9	174.6	715.2	161.6	200.3	193.8	381.7	467	659.9
FALSE	High	Master Protein	P52430	Serum paraoxonase/arylesterase 1 OS=Mus musculus OX=10090 GN=Pon1 PE=1 SV=2	0	53.895	30	9	29	9	9	355	39.5	5.22	100.96	9	0	2835.7	3537.3	2939.7	3303.8	5448.5	7486.4	8302.5	13050.3	16393.1	3147.2	6750	1296.7	1608	1881.8	3137.1	5418.3	2092.4	6240.3	5072.6	6504.6	1798.1	1179.6	578.9	760.6	823.4	2940.9	1181	2385.7	2986.6	1005.4	3254.8	1296.7
FALSE	High	Master Protein	Q6A028	Switch-associated protein 70 OS=Mus musculus OX=10090 GN=Swap70 PE=1 SV=2	0	53.868	24	17	27	17	17	585	69	6.05	73.71	17	0	3380.2	3187.9	2156.6	3429.3	1456.4	1105.3	1070.7	847.9	1180.7	2277.3	2302	4008.2	2740	1885	2142.1	763.5	2356.8	747.7	908.6	847.1	2143.3	1063.1	424.7	789.5	220.1	434.2	152.3	155	215.1	727.5	1110	4008.2
FALSE	High	Master Protein	P97351	40S ribosomal protein S3a OS=Mus musculus OX=10090 GN=Rps3a PE=1 SV=3	0	53.631	64	17	32	17	17	264	29.9	9.73	91.54	17	0	3026.1	3205.3	3341.8	2059.3	3172.2	1187.3	1348.4	1243.9	1377.2	2536.5	2117	3738.4	2974.3	3591.3	2441.8	1537.2	3263.5	1622.9	1610.9	1176.9	1918.8	1068.9	658.1	474.1	479.4	466.4	191.8	227.4	250.9	810.3	1020.8	3738.4
FALSE	High	Master Protein	P29758	Ornithine aminotransferase, mitochondrial OS=Mus musculus OX=10090 GN=Oat PE=1 SV=1	0	53.627	30	12	28	12	12	439	48.3	6.62	97.61	12	0	5463.9	4890	5794.5	1789.6	2849.3	1112.4	951.2	1243.4	1173	1434.3	3430.4	2356.5	2067.3	1995.3	490	418.3	2246.4	339.4	547.2	344.3	3464.6	1630.7	1141.1	412	430.6	437	135.3	227.3	213.7	458.2	1654.1	2356.5
FALSE	High	Master Protein	P15532	Nucleoside diphosphate kinase A OS=Mus musculus OX=10090 GN=Nme1 PE=1 SV=1	0	53.466	70	10	35	6	6	152	17.2	7.37	92.81	10	5	5941	5234.9	4421.4	8802.5	4082.1	3496.7	2286.9	2051.3	2335.5	5263.7	5144	7117.2	6573.4	5047.7	6203.2	2345.3	5966.8	2706.6	2739	3701.7	3767.1	1745.7	870.7	2026.5	616.9	1373.6	325.3	375	425.5	1681.5	2480.4	7117.2
FALSE	High	Master Protein	Q8R016	Bleomycin hydrolase OS=Mus musculus OX=10090 GN=Blmh PE=1 SV=1	0	53.271	26	11	24	11	11	455	52.5	6.48	70.31	11	0	2741.3	2834.4	2414.6	2102.8	2615.7	2138.1	2109.7	2045.9	2123.1	1947.7	2522.4	2302.4	1966.9	2181.4	1392	1560.6	1870.6	1045.8	1587.2	2138.3	1738.2	945.2	475.5	484.1	395.3	839.9	300.1	374	386.8	622.2	1216.3	2302.4
FALSE	High	Master Protein	Q9R0Y5	Adenylate kinase isoenzyme 1 OS=Mus musculus OX=10090 GN=Ak1 PE=1 SV=1	0	53.133	54	11	24	11	11	194	21.5	5.81	66.19	11	0	2838.6	4544	3604.4	2639.7	1283	663.6	870.3	631.3	710.3	582.2	1639.6	613.4	709.8	1147.8	811.8	139.4	453.1	308.4	284.4	157.8	1799.9	1515.3	709.8	607.7	193.9	260.7	123.8	115.4	129.4	186	790.6	613.4
FALSE	High	Master Protein	Q06138	Calcium-binding protein 39 OS=Mus musculus OX=10090 GN=Cab39 PE=1 SV=2	0	53.097	45	17	35	12	12	341	39.8	6.89	101.18	17	5	9110.6	8099.8	5365.4	6592	4980.6	2774.5	2533.6	2014.7	2473.3	4970	6102.8	8371.5	5690.6	4164.4	4256.1	2153.3	5827.6	2248.4	2383.9	2479	5776.9	2701.1	1056.6	1517.6	752.7	1089.9	360.4	368.3	450.6	1587.7	2942.7	8371.5
FALSE	High	Master Protein	P35505	Fumarylacetoacetase OS=Mus musculus OX=10090 GN=Fah PE=1 SV=2	0	53.016	27	10	20	10	10	419	46.1	7.18	64.15	10	0	2387.7	2459.8	2309	4021.4	1349.9	1067.9	1417.3	1147.1	1348.6	1650.6	1766.1	1745.5	2360.1	1438.5	2186.5	803.7	1200.1	1538.5	2314.7	875.4	1514	820.3	454.7	925.8	204	419.5	201.6	209.7	245.7	527.3	851.6	1745.5
FALSE	High	Master Protein	Q9R0P3	S-formylglutathione hydrolase OS=Mus musculus OX=10090 GN=Esd PE=1 SV=1	0	53.016	45	10	36	10	10	282	31.3	7.12	117.83	10	0	3801.1	3696.8	2811.7	3372.9	2308.7	1443.1	1564.2	1202.4	1583.5	3177	2963.1	5166.1	4116	3087.6	2847.7	1303.7	3589	1609.2	2191.7	1864.2	2410.2	1232.8	553.7	776.5	348.9	566.9	222.5	219.8	288.5	1014.9	1428.8	5166.1
FALSE	High	Master Protein	Q8VCW8	Medium-chain acyl-CoA ligase ACSF2, mitochondrial OS=Mus musculus OX=10090 GN=Acsf2 PE=1 SV=1	0	52.988	27	16	29	16	16	615	67.9	8.18	81.82	16	0	2589.9	2568.7	2339.9	687.6	1299.6	524.9	406.3	448	515.4	1228	1352.6	1888	1569.3	1403.4	616.3	488.3	1628.8	533.2	715.7	651.3	1642.2	856.6	460.8	158.3	196.4	206.2	57.8	81.9	93.9	392.3	652.2	1888
FALSE	High	Master Protein	Q3B7Z2	Oxysterol-binding protein 1 OS=Mus musculus OX=10090 GN=Osbp PE=1 SV=3	0	52.974	19	15	21	15	15	805	88.7	7.2	58.36	15	0	1138.8	1073.8	865.8	857	728.5	484.4	483	461.7	434.7	1396.8	895.7	1954.7	1555.2	1404.2	1450.5	897.8	1744.4	892.4	2602	1121.4	722.1	358.1	170.5	197.3	110.1	190.3	68.7	84.4	79.2	446.2	431.9	1954.7
FALSE	High	Master Protein	Q9WVL7	C-X-C motif chemokine 15 OS=Mus musculus OX=10090 GN=Cxcl15 PE=1 SV=1	0	52.971	53	11	48	11	11	167	19.1	7.34	121.37	11	0	3202.9	2914.2	3654.1	2174.5	6572.7	3415.2	973	1559.6	1434.2	5187.9	3088	7017.2	8614.7	9651.3	3818.4	5321.9	9739.1	3128.7	3234.5	1930.4	2030.9	971.8	719.6	500.6	993.3	1341.6	138.4	285.1	261.3	1657.3	1489	7017.2
FALSE	High	Master Protein	Q11136	Xaa-Pro dipeptidase OS=Mus musculus OX=10090 GN=Pepd PE=1 SV=3	0	52.955	32	14	28	14	14	493	55	5.78	73.07	14	0	1660.3	2778.3	2198.3	2087.6	2748.7	1782.4	1227.4	1073.8	1196.6	1961.2	2217	2563.6	2420.4	2112	1400.9	1638	2062.6	1487.7	1789.9	1583.6	1052.8	926.5	432.9	480.6	415.4	700.2	174.6	196.3	218	626.5	1069	2563.6
FALSE	High	Master Protein	O70400	PDZ and LIM domain protein 1 OS=Mus musculus OX=10090 GN=Pdlim1 PE=1 SV=4	0	52.933	39	12	26	12	12	327	35.8	6.84	79.03	12	0	2678.5	2066.1	1704.7	2000.3	2826.1	1075.5	1107.9	859.4	1014.9	1375.8	1759.3	1926.4	1614.2	1989.5	1316.3	670.8	1829.6	923.5	929.5	680.3	1698.4	689	335.7	460.5	427.1	422.5	157.6	157.1	184.9	439.5	848.3	1926.4
FALSE	High	Master Protein	Q99JI4	26S proteasome non-ATPase regulatory subunit 6 OS=Mus musculus OX=10090 GN=Psmd6 PE=1 SV=1	0	52.764	36	16	26	16	16	389	45.5	5.52	62.3	16	0	1961.4	1813	1728.6	1213.2	1834.9	1145	1122.7	1065	1073.6	2497.4	1516.4	3238.8	2187	2304.7	2180.9	1284.7	2514.9	1408.5	1817.1	2524.8	1243.7	604.6	340.4	279.3	277.3	449.8	159.7	194.7	195.6	797.8	731.2	3238.8
FALSE	High	Master Protein	P02535	Keratin, type I cytoskeletal 10 OS=Mus musculus OX=10090 GN=Krt10 PE=1 SV=3	0	52.695	14	10	42	6	6	570	57.7	5.11	128.16	10	0	927.3	2414.6	5641.7	2240.5	2422.5	2483	5130.5	8722.2	3941	4674.5	2193.9	1842.5	2448.6	7438.9	6531.4	14000.8	3394.9	8352.5	7357.9	1935.2	588	805.2	1111	515.8	366.1	975.4	729.8	1594.5	718	1493.3	1057.9	1842.5
FALSE	High	Master Protein	P27612	Phospholipase A-2-activating protein OS=Mus musculus OX=10090 GN=Plaa PE=1 SV=4	0	52.695	19	16	23	16	16	794	87.2	6.14	59	16	0	1613	1493.4	1413.2	1158.9	1248	956.6	764.2	824.9	830.5	1765.5	1248.5	2230.9	1763.4	1815.6	1708.6	1491.2	1654.4	1416.2	1515.2	1282.8	1022.8	498	278.3	266.8	188.6	375.8	108.7	150.8	151.3	564	602	2230.9
FALSE	High	Master Protein	Q9DB77	Cytochrome b-c1 complex subunit 2, mitochondrial OS=Mus musculus OX=10090 GN=Uqcrc2 PE=1 SV=1	0	52.656	34	13	23	13	13	453	48.2	9.25	68.93	13	0	1594.3	1597.7	1831.6	851.4	1355.8	571	743.8	903.7	827.2	2372.8	1139	3509.5	3005.1	3327.6	1283.1	1381	3196.3	1420.5	1618.6	1006.9	1010.9	532.8	360.7	196	204.9	224.3	105.8	165.2	150.7	758	549.2	3509.5
FALSE	High	Master Protein	Q91XV3	Brain acid soluble protein 1 OS=Mus musculus OX=10090 GN=Basp1 PE=1 SV=3	0	52.582	42	9	20	9	9	226	22.1	4.51	68.69	9	0	1969.3	1436.7	2708.6	452.6	1564.9	944.9	904.8	747.2	826.6	1031.8	1478.9	1348.9	2312.5	3288.4	476.5	624.1	1301.4	515.1	696.8	860.9	1248.7	479.1	533.4	104.2	236.5	371.2	128.7	136.6	150.6	329.6	713.1	1348.9
FALSE	High	Master Protein	O88544	COP9 signalosome complex subunit 4 OS=Mus musculus OX=10090 GN=Cops4 PE=1 SV=1	0	52.407	36	13	24	13	13	406	46.3	5.83	79.18	13	0	2659.7	2430.5	2148	2537.6	1991.7	1381.8	1199.3	1122.5	1144.4	2284.5	1899.5	3053.9	2377.7	2349.6	2850	965	2489.3	1396.4	1390.1	1638.2	1686.5	810.5	423	584.2	301	542.8	170.6	205.2	208.5	729.8	915.9	3053.9
FALSE	High	Master Protein	Q99L20	Glutathione S-transferase theta-3 OS=Mus musculus OX=10090 GN=Gstt3 PE=1 SV=1	0	52.387	39	9	25	8	8	241	27.4	7.74	91.1	9	1	3570.5	3845	2884.8	1551.1	1127.5	824	563.8	556.9	697.1	1350.1	2367.1	2458.6	1623.9	1276	1037.1	586.9	1547.6	490.2	684.2	536.3	2264	1282.2	568.1	357.1	170.4	323.7	80.2	101.8	127	431.3	1141.4	2458.6
FALSE	High	Master Protein	Q8JZQ9	Eukaryotic translation initiation factor 3 subunit B OS=Mus musculus OX=10090 GN=Eif3b PE=1 SV=1	0	52.354	18	16	30	16	16	803	91.3	5.02	84	16	0	2869.7	2714.7	2417.1	2468.1	2527	1627.9	1869.3	1917.9	1855.2	3048	2614.1	3425.9	2401.9	2614.9	2667.2	1433.6	2904.7	1768.5	2504.1	4189.3	1819.6	905.3	476	568.2	381.9	639.5	265.9	350.6	338	973.7	1260.5	3425.9
FALSE	High	Master Protein	Q3THS6	S-adenosylmethionine synthase isoform type-2 OS=Mus musculus OX=10090 GN=Mat2a PE=1 SV=2	0	52.344	37	13	23	10	10	395	43.7	6.48	73.59	13	3	3392.8	2936	2602	2766.9	2604.5	1350.5	1793.4	1328.2	1782.8	3022.6	2321.9	4297	3390.4	3462.3	3082.4	1698.5	3364.8	1669.5	2116.9	2156.2	2151.3	979.1	512.4	637	393.6	530.5	255.1	242.8	324.8	965.6	1119.6	4297
FALSE	High	Master Protein	Q8K183	Pyridoxal kinase OS=Mus musculus OX=10090 GN=Pdxk PE=1 SV=1	0	52.302	38	11	24	11	11	312	35	6.29	74.31	11	0	1876.1	1925.5	1568.1	1024.2	1369.1	997.6	760.6	758.7	887	1449.3	1306.7	2020.3	1947.9	1947.1	813.6	639.4	1558	580.6	950.5	678.5	1189.6	642.1	308.8	235.8	206.9	391.9	108.2	138.7	161.6	463	630.1	2020.3
FALSE	High	Master Protein	Q9DCW4	Electron transfer flavoprotein subunit beta OS=Mus musculus OX=10090 GN=Etfb PE=1 SV=3	0	52.205	49	12	27	12	12	255	27.6	8.1	89.45	12	0	4587.7	3649.7	4364.6	1145.4	2130.7	846.2	761.4	742.9	963.3	1821.5	2481.8	3188.1	2858.5	2042.6	805.2	683.9	2193.5	595.3	644.4	577.6	2909	1217.1	859.5	263.7	322	332.4	108.3	135.8	175.5	581.9	1196.7	3188.1
FALSE	High	Master Protein	Q60590	Alpha-1-acid glycoprotein 1 OS=Mus musculus OX=10090 GN=Orm1 PE=1 SV=1	0	52.166	40	8	38	5	5	207	23.9	5.85	126.78	8	4	2272.6	2778.3	3832.4	3008.4	4677.6	5742.4	6871.9	8765.5	4781.9	3855	4602.5	2413.6	5095.3	3762.7	1865.3	4212.4	3201	2883.2	6499.7	7882.4	1441	926.5	754.7	692.6	706.9	2255.8	977.5	1602.4	871.2	1231.5	2219.3	2413.6
FALSE	High	Master Protein	P28474	Alcohol dehydrogenase class-3 OS=Mus musculus OX=10090 GN=Adh5 PE=1 SV=3	0	52.122	35	11	28	10	10	374	39.5	7.25	86.26	11	0	3223.5	3552	2778.7	3410.7	2069.1	1088	1073.5	858.8	1074.2	1435.9	2192.1	2163.7	1980.1	1562.6	1652	530.7	1690.2	788.2	756.9	656.7	2044	1184.5	547.2	785.2	312.7	427.4	152.7	157	195.7	458.7	1057	2163.7
FALSE	High	Master Protein	P25444	40S ribosomal protein S2 OS=Mus musculus OX=10090 GN=Rps2 PE=1 SV=3	0	52.1	42	13	26	13	13	293	31.2	10.24	78.38	13	0	3282.1	3368.8	3355.6	3993.2	3718.8	2857.2	2165.3	2166.2	2225.7	4719.9	2746.2	5296.1	4593.3	4440.3	7150.1	4759.1	5612.3	4632	3356.8	3303.2	2081.1	1123.4	660.8	919.3	562	1122.4	308	396	405.5	1507.8	1324.2	5296.1
FALSE	High	Master Protein	P49722	Proteasome subunit alpha type-2 OS=Mus musculus OX=10090 GN=Psma2 PE=1 SV=3	0	52.032	51	8	23	8	8	234	25.9	7.43	89.75	8	0	1506	1632.8	1414.2	1660.6	1539.8	1158.5	1189.5	1028.4	1138.9	1769	1439.1	2001.6	1692.6	1796.1	1704.9	1054	1726	1125	2275.6	1657.3	954.9	544.5	278.5	382.3	232.7	455.1	169.2	188	207.5	565.1	693.9	2001.6
FALSE	High	Master Protein	Q8BT60	Copine-3 OS=Mus musculus OX=10090 GN=Cpne3 PE=1 SV=2	0	51.989	25	13	26	11	12	533	59.5	5.78	83.22	13	1	3244.1	3585.3	2654.3	1722.7	2100.9	1386.6	1289.3	1224.2	1484.7	3926.4	2428.3	7038.2	5815.2	4308.1	1268.6	1658.4	5527.2	1487.7	1541.8	1611.9	2057	1195.6	522.7	396.6	317.5	544.7	183.4	223.8	270.5	1254.3	1170.9	7038.2
FALSE	High	Master Protein	Q9QYB1	Chloride intracellular channel protein 4 OS=Mus musculus OX=10090 GN=Clic4 PE=1 SV=3	0	51.961	45	9	16	9	9	253	28.7	5.59	52.78	9	0	1361.3	1291.2	931.3	1443.4	1150	633.6	777.5	623.1	606.5	728.7	1168.2	1057.8	809.7	722.5	806.1	365	956.7	517.7	533.3	506.9	863.2	430.6	183.4	332.3	173.8	248.9	110.6	113.9	110.5	232.8	563.3	1057.8
FALSE	High	Master Protein	Q8K0D2	Hyaluronan-binding protein 2 OS=Mus musculus OX=10090 GN=Habp2 PE=1 SV=2	0	51.668	25	13	29	13	13	558	62.3	6.37	75.59	13	0	1125.7	1464.3	1251.2	1431.2	1482.2	2428.3	2064.7	2005.4	2262.5	1890.7	1462.9	1236.3	1524.4	2730	2182.3	4378.9	1450.4	2803.1	2112.1	1510.4	713.8	488.3	246.4	329.5	224	953.9	293.7	366.6	412.2	604	705.4	1236.3
FALSE	High	Master Protein	Q9DB16	Calcium-binding protein 39-like OS=Mus musculus OX=10090 GN=Cab39l PE=1 SV=3	0	51.664	42	15	25	10	10	337	39.1	8.31	75.5	15	0	2839.2	2659	2031.7	905.7	1477.6	614.3	492.1	441.4	680.1	885.6	1838.5	1497.9	1095.9	803.3	688.3	295.6	1128.3	619.4	531.9	605.9	1800.3	886.7	400.1	208.5	223.3	241.3	70	80.7	123.9	282.9	886.5	1497.9
FALSE	High	Master Protein	Q8R0F9	SEC14-like protein 4 OS=Mus musculus OX=10090 GN=Sec14l4 PE=1 SV=1	0	51.612	33	12	22	12	12	403	46	7.12	61.77	12	0	2252.5	2381	1544.2	1285.7	860.2	700	599.7	558	764.1	1336	1366.1	2260.9	1848.4	1405	1146.1	513.1	1548.1	634	741.5	560.6	1428.3	794	304.1	296	130	275	85.3	102	139.2	426.8	658.7	2260.9
FALSE	High	Master Protein	P80316	T-complex protein 1 subunit epsilon OS=Mus musculus OX=10090 GN=Cct5 PE=1 SV=1	0	51.465	27	16	30	15	15	541	59.6	6.02	84.89	16	0	7445.4	5946.8	5829.6	4000.1	5278.4	2366.2	1806.7	1573.2	1925.5	4683	4688.4	8243.4	5726.2	6276.4	4019.9	1956.2	5914	2201	1908.7	2048.7	4721	1983.1	1148	920.9	797.7	929.5	257	287.6	350.8	1496	2260.7	8243.4
FALSE	High	Master Protein	O35381	Acidic leucine-rich nuclear phosphoprotein 32 family member A OS=Mus musculus OX=10090 GN=Anp32a PE=1 SV=1	0	51.447	32	10	30	3	6	247	28.5	4.07	90.39	10	4	6881.3	5492.1	5037.9	3640.4	5142.1	1849.9	1758.9	1614.8	1556.1	3800.2	3712	6338.3	4750.5	5146.5	2681.2	1420.4	5434.7	1604	1564.8	2070.3	4363.3	1831.5	992.1	838.1	777.1	726.7	250.2	295.2	283.5	1214	1789.9	6338.3
FALSE	High	Master Protein	P01837	Immunoglobulin kappa constant OS=Mus musculus OX=10090 GN=Igkc PE=1 SV=2	0	51.393	76	5	62	5	5	107	11.9	5.9	202.64	5	0	2034.6	2996.3	4047.2	2221.4	2803.6	5046.2	8077.5	9899.4	9075.9	6093.8	4843.3	2639	3520.7	4289.3	9442.7	12789.8	6415	11462.3	8532.1	8104.1	1290.1	999.2	797	511.4	423.7	1982.3	1149	1809.7	1653.5	1946.7	2335.4	2639
FALSE	High	Master Protein	Q9WVJ3	Carboxypeptidase Q OS=Mus musculus OX=10090 GN=Cpq PE=1 SV=1	0	51.326	24	11	19	11	11	470	51.8	6.21	62.02	11	0	2589.4	3559.2	3740	2130.6	3370.1	4130.3	3723.8	2417.3	4727	1321	3176.8	1046.5	1366.7	1383.8	1212.5	1649.6	1586	1305.1	1451.6	1325.4	1641.9	1186.9	736.5	490.5	509.3	1622.5	529.7	441.9	861.2	422	1531.8	1046.5
FALSE	High	Master Protein	Q9CZU6	Citrate synthase, mitochondrial OS=Mus musculus OX=10090 GN=Cs PE=1 SV=1	0	51.22	23	11	31	11	11	464	51.7	8.57	85.06	11	0	4469.9	3637.4	3383.5	1824.8	2515.8	1038.6	1257	1002.7	1140.6	1705.7	2352	2702.6	2239	1880.1	1075	765	2469	711.5	954	673	2834.3	1213	666.3	420.1	380.2	408	178.8	183.3	207.8	544.9	1134.1	2702.6
FALSE	High	Master Protein	P28063	Proteasome subunit beta type-8 OS=Mus musculus OX=10090 GN=Psmb8 PE=1 SV=2	0	51.19	41	10	21	10	10	276	30.2	6.68	65.93	10	0	1551.8	1687.4	1438.6	2140.1	1654.9	1264.4	1396.9	1397.6	1365.6	1410.5	1665.5	1339.2	1383	1247.4	1487.4	940.2	1315.7	989.8	1072.8	1776	984	562.7	283.3	492.7	250.1	496.7	198.7	255.5	248.8	450.6	803.1	1339.2
FALSE	High	Master Protein	Q9DBP5	UMP-CMP kinase OS=Mus musculus OX=10090 GN=Cmpk1 PE=1 SV=1	0	51.184	40	8	25	8	8	196	22.2	5.83	84.5	8	0	1869	1538.9	1226.8	2331.3	1228.1	726.5	591.2	483	581.3	1052.4	1194.3	1676.3	1649	1218.9	973.1	370.1	1212.8	481.5	456.4	406.7	1185.1	513.2	241.6	536.7	185.6	285.4	84.1	88.3	105.9	336.2	575.9	1676.3
FALSE	High	Master Protein	P00493	Hypoxanthine-guanine phosphoribosyltransferase OS=Mus musculus OX=10090 GN=Hprt1 PE=1 SV=3	0	51.165	53	10	24	10	10	218	24.6	6.68	79.46	10	0	3506.6	3412.8	3923.8	2147.1	3976.2	2259.5	1929	1723.7	1764.1	2929.1	3447.2	4255.2	4286.9	3727.6	1605.3	1325.6	3892	1013.1	1654.3	2688.4	2223.5	1138.1	772.7	494.3	600.9	887.6	274.4	315.1	321.4	935.7	1662.2	4255.2
FALSE	High	Master Protein	P62908	40S ribosomal protein S3 OS=Mus musculus OX=10090 GN=Rps3 PE=1 SV=1	0	51.155	47	13	30	13	13	243	26.7	9.66	79.64	13	0	6526.6	5605.5	4926.2	4199.9	4626.6	1963.2	1792	1495	1806.9	3725.7	4015.8	5517	3998	4451.8	3745.5	1598.5	4877.2	1799.5	1688.5	2470.4	4138.4	1869.3	970.1	966.9	699.2	771.2	254.9	273.3	329.2	1190.2	1936.4	5517
FALSE	High	Master Protein	A2AN08	E3 ubiquitin-protein ligase UBR4 OS=Mus musculus OX=10090 GN=Ubr4 PE=1 SV=1	0	51.044	3	20	28	20	20	5180	571.9	6.06	63.26	20	0	1334.4	1224.4	1412.2	2633.1	5940.8	1308.4	2105.5	1623.6	1304.2	1534.2	1364.2	1393.7	1229.8	1637.7	2890.7	4760.6	1371.9	2235.4	1926.8	1733.4	846.1	408.3	278.1	606.2	897.8	514	299.5	296.8	237.6	490.1	657.8	1393.7
FALSE	High	Master Protein	Q9D7P7	Chloride intracellular channel protein 3 OS=Mus musculus OX=10090 GN=Clic3 PE=1 SV=2	0	50.993	53	10	23	10	10	237	26.8	6.44	77.42	10	0	1283.9	1388.7	834.3	2459.8	768.9	663.9	798.6	619.2	618.6	999.8	1026.6	987.7	1608.5	1806.7	2102.3	421.9	967	538.4	856.8	658.3	814.1	463.1	164.3	566.3	116.2	260.8	113.6	113.2	112.7	319.4	495	987.7
FALSE	High	Master Protein	Q02788	Collagen alpha-2(VI) chain OS=Mus musculus OX=10090 GN=Col6a2 PE=1 SV=3	0	50.965	14	16	30	16	16	1034	110.3	6.42	90.96	16	0	1269.4	1141.6	1709.8	3968.8	3109.3	3831.4	8552.7	10484.7	9114.9	2327.7	3311.1	801	1043.1	1570.7	2939.3	8513.2	1256	14759.9	5613.5	2037	804.9	380.7	336.7	913.7	469.9	1505.1	1216.6	1916.7	1660.6	743.6	1596.6	801
FALSE	High	Master Protein	O89053	Coronin-1A OS=Mus musculus OX=10090 GN=Coro1a PE=1 SV=5	0	50.932	24	13	31	12	12	461	51	6.48	91.44	13	0	3679.2	3193	2380.6	3727.8	3983.5	2461.1	5542.5	6197.2	3613.3	4041.3	4352	6084.5	2680.2	2431.2	2561.5	1735.8	4956.8	1759.9	2882.9	5847.5	2332.9	1064.8	468.8	858.2	602	966.8	788.4	1132.9	658.3	1291	2098.5	6084.5
FALSE	High	Master Protein	Q7TMK9	Heterogeneous nuclear ribonucleoprotein Q OS=Mus musculus OX=10090 GN=Syncrip PE=1 SV=2	0	50.871	22	13	22	13	13	623	69.6	8.59	72.46	13	0	2654.7	1837.3	1775.3	1552.4	1738.3	1004	834.5	950.2	900.2	1468.8	1656.2	2276.3	1413.4	1484.2	1325.6	732.1	1762.8	960.5	1465.6	1046.4	1683.3	612.7	349.6	357.4	262.7	394.4	118.7	173.7	164	469.2	798.6	2276.3
FALSE	High	Master Protein	Q3UW53	Protein Niban 1 OS=Mus musculus OX=10090 GN=Niban1 PE=1 SV=2	0	50.821	17	16	24	16	16	926	102.6	4.78	59.46	16	0	1723	1383.6	1024.2	1123.3	1460.4	642.5	677.7	1061.8	790.9	2999.2	1305.9	4403.5	2060.7	2254	1639.4	1077.4	3794.3	1016.5	1527.8	1878.7	1092.5	461.4	201.7	258.6	220.7	252.4	96.4	194.1	144.1	958.1	629.7	4403.5
FALSE	High	Master Protein	P14733	Lamin-B1 OS=Mus musculus OX=10090 GN=Lmnb1 PE=1 SV=3	0	50.813	25	15	23	14	14	588	66.7	5.16	71.12	15	0	373	441.4	505.8	705	655.7	572.3	2152.6	1802.4	993.5	1568.9	898.8	665.6	833.9	1165.8	755.6	1056.9	963.7	1240.5	1869.5	3635.5	236.5	147.2	99.6	162.3	99.1	224.8	306.2	329.5	181	501.2	433.4	665.6
FALSE	High	Master Protein	Q9R098	Hepatocyte growth factor activator OS=Mus musculus OX=10090 GN=Hgfac PE=1 SV=1	0	50.81	17	9	27	9	9	653	70.5	7.03	79.91	9	0	1432.6	2096.4	2537.5	1795.7	2739.5	3600.8	2727	2595.6	2433.8	2213.8	2378.9	1574.2	2307.7	2015.7	1658.6	2336.5	2272.1	2259.6	2407	3057	908.4	699.1	499.7	413.4	414	1414.5	387.9	474.5	443.4	707.2	1147.1	1574.2
FALSE	High	Master Protein	Q61468	Mesothelin OS=Mus musculus OX=10090 GN=Msln PE=1 SV=1	0	50.704	20	12	28	12	12	625	69.4	7.59	67.37	12	0	2638	2808.6	3461.2	2892.5	3428.3	4314.1	6088.7	5922	5915.4	3742	3823.4	1929.2	2442	2848.4	2461.9	3244.5	2860.4	5824.2	7136.4	6598	1672.7	936.6	681.6	665.9	518.1	1694.7	866.1	1082.6	1077.7	1195.4	1843.6	1929.2
FALSE	High	Master Protein	Q6P5F9	Exportin-1 OS=Mus musculus OX=10090 GN=Xpo1 PE=1 SV=1	0	50.581	15	15	24	15	15	1071	123	6.07	66.42	15	0	2959.7	2730.6	2473.5	3135.7	2613.7	2218	1669.6	1609.3	1723.5	1597.1	2567.2	1805.6	1662.2	1095.6	1420.1	789.8	1412.1	863.2	874.3	1667	1876.7	910.6	487.1	721.9	395	871.3	237.5	294.2	314	510.2	1237.9	1805.6
FALSE	High	Master Protein	O88958	Glucosamine-6-phosphate isomerase 1 OS=Mus musculus OX=10090 GN=Gnpda1 PE=1 SV=3	0	50.578	39	10	23	8	8	289	32.5	6.6	72.52	10	2	1923.6	2198.4	2034.8	1654.1	2573.4	1883	1169.1	1364.3	1434.2	1913.9	1969.6	2434.4	2161.5	1983	1179.8	1405.1	2623.8	921.7	1366.3	1939.7	1219.7	733.1	400.7	380.8	388.9	739.7	166.3	249.4	261.3	611.4	949.7	2434.4
FALSE	High	Master Protein	Q6P5E4	UDP-glucose:glycoprotein glucosyltransferase 1 OS=Mus musculus OX=10090 GN=Uggt1 PE=1 SV=4	0	50.545	9	14	20	14	14	1551	176.3	5.62	55.98	14	0	1222.2	854.3	767.8	663.7	1004.5	562.8	422.5	415.7	542.3	1466.6	732.3	1849.3	1417.4	1874.4	971.2	1127.7	1859.2	836.5	1252.4	1296.4	775	284.9	151.2	152.8	151.8	221.1	60.1	76	98.8	468.5	353.1	1849.3
FALSE	High	Master Protein	Q9DB05	Alpha-soluble NSF attachment protein OS=Mus musculus OX=10090 GN=Napa PE=1 SV=1	0	50.425	49	12	23	10	12	295	33.2	5.45	69.19	12	0	1313.4	1293.6	979.5	885.2	759.6	526.4	670	618.7	588.4	865.2	1091.9	1437.1	1145.7	1117.6	872.1	577.4	1001.5	706.4	617.8	445.7	832.8	431.4	192.9	203.8	114.8	206.8	95.3	113.1	107.2	276.4	526.5	1437.1
FALSE	High	Master Protein	Q8K2I4	Beta-mannosidase OS=Mus musculus OX=10090 GN=Manba PE=1 SV=1	0	50.422	15	14	26	14	14	879	100.8	7.25	78.1	14	0	3120.9	2569.9	2936.6	2053.7	3225.8	2020	1394.8	1223.1	1615.9	2138	2457.5	2841.1	2545	2464.7	1631	2081.8	3162.6	1343	1317.4	910.6	1978.9	857	578.3	472.8	487.5	793.5	198.4	223.6	294.4	683	1185	2841.1
FALSE	High	Master Protein	Q8VDN2	Sodium/potassium-transporting ATPase subunit alpha-1 OS=Mus musculus OX=10090 GN=Atp1a1 PE=1 SV=1	0	50.385	16	16	24	8	16	1023	112.9	5.45	65.19	16	0	2263.3	1846.9	2017	1504.2	1952	1091.6	2507.6	1859.9	2662.1	2530.9	1499.6	2217	2312.9	3033.7	2361.8	2775.2	2188.9	2810.9	2915.8	2338.4	1435.1	615.9	397.2	346.3	295	428.8	356.7	340	485	808.5	723.1	2217
FALSE	High	Master Protein	Q8BVE3	V-type proton ATPase subunit H OS=Mus musculus OX=10090 GN=Atp6v1h PE=1 SV=1	0	50.327	28	13	25	13	13	483	55.8	6.61	68.08	13	0	1464.3	1521.8	1164.9	1203.6	1503.4	1152.7	897.7	795.9	962.2	1294.1	1430.8	1725	1217.9	1451.5	1374.7	846.7	1493.7	879.5	1009.9	1104.2	928.5	507.5	229.4	277.1	227.2	452.8	127.7	145.5	175.3	413.4	689.9	1725
FALSE	High	Master Protein	P11680	Properdin OS=Mus musculus OX=10090 GN=Cfp PE=1 SV=2	0	50.32	22	9	36	9	9	464	50.3	7.84	102.06	9	0	1058.5	1284.7	1424.9	2040.2	2253.1	3436.1	3385.7	2874.6	2934.9	2807	2074.1	1190.2	1757.3	1688.3	3534.1	6196.4	2279.8	5616.6	4912.5	2368.1	671.2	428.4	280.6	469.7	340.5	1349.8	481.6	525.5	534.7	896.7	1000.1	1190.2
FALSE	High	Master Protein	Q5XJY5	Coatomer subunit delta OS=Mus musculus OX=10090 GN=Arcn1 PE=1 SV=2	0	50.266	27	14	24	14	14	511	57.2	6.21	70.54	14	0	3600.2	2973.8	3062.6	2193.6	2394	1369.5	1485.4	1493.4	1279.5	1539.5	2462.3	1987.7	1534.9	1569.9	1494.9	863.5	1484.4	921.7	1278.3	1192.8	2282.8	991.7	603.1	505	361.8	538	211.3	273	233.1	491.8	1187.3	1987.7
FALSE	High	Master Protein	Q922R8	Protein disulfide-isomerase A6 OS=Mus musculus OX=10090 GN=Pdia6 PE=1 SV=3	0	50.241	27	11	23	11	11	440	48.1	5.14	70.18	11	0	3183.6	2136.9	1655.4	1283.6	1314.8	744.8	558.2	622.5	872.7	1629.7	1596.3	2031.9	1759.9	2098.9	808.5	958.4	1588.6	963.1	1204.2	1190.5	2018.7	712.6	326	295.5	198.7	292.6	79.4	113.8	159	520.6	769.7	2031.9
FALSE	High	Master Protein	Q99LF4	RNA-splicing ligase RtcB homolog OS=Mus musculus OX=10090 GN=Rtcb PE=1 SV=1	0	50.218	30	13	17	13	13	505	55.2	7.23	51.84	13	0	1752	1430.1	1775.8	974.7	1899.1	703.4	680.5	606.6	684.5	1517	1174	2041.9	1834.8	2113.6	1840.5	872.3	1948.9	758.9	956.1	892.4	1110.9	476.9	349.7	224.4	287	276.3	96.8	110.9	124.7	484.6	566.1	2041.9
FALSE	High	Master Protein	P14206	40S ribosomal protein SA OS=Mus musculus OX=10090 GN=Rpsa PE=1 SV=4	0	50.212	28	8	26	8	8	295	32.8	4.87	89.25	8	0	1833.4	1668.2	1847.9	849.6	1608.6	716.1	613.7	577.7	754.2	1347	1328.3	2006.6	1691.7	2207.5	825.8	519	1591.4	672.8	1604.7	862.7	1162.5	556.3	363.9	195.6	243.1	281.3	87.3	105.6	137.4	430.3	640.5	2006.6
FALSE	High	Master Protein	Q9DBE0	Cysteine sulfinic acid decarboxylase OS=Mus musculus OX=10090 GN=Csad PE=1 SV=1	0	50.19	25	14	26	14	14	493	55.1	6.61	71.1	14	0	2824.4	2870.7	2190.7	1197.6	1338.6	575.1	394.4	535	546.1	2626.7	1713.4	4267	2859.8	2734.9	1377.5	1308	2943.4	1121.6	1397.8	1252.2	1790.9	957.3	431.4	275.7	202.3	225.9	56.1	97.8	99.5	839.1	826.2	4267
FALSE	High	Master Protein	Q8BXK9	Chloride intracellular channel protein 5 OS=Mus musculus OX=10090 GN=Clic5 PE=1 SV=1	0	50.151	42	7	20	6	6	251	28.3	5.94	85.81	7	0	2532.5	4281.9	2565.4	1254	2726.9	1281	1599.3	964.4	1389.8	1687.9	2095.9	1720.7	2202	2456.5	756.6	462	2911.7	609.9	1021.1	1384.1	1605.8	1427.9	505.2	288.7	412.1	503.2	227.5	176.3	253.2	539.2	1010.6	1720.7
FALSE	High	Master Protein	P51150	Ras-related protein Rab-7a OS=Mus musculus OX=10090 GN=Rab7a PE=1 SV=2	0	50.05	56	10	21	10	10	207	23.5	6.7	72.95	10	0	1452.2	1556.3	1528.5	2209.2	1746.9	1905.4	1797.6	2006.5	1665.3	2019.1	1762	1966.6	1564.4	1509.5	2188.8	1180.3	1820.3	1368.8	1638.9	2893.8	920.8	519	301	508.6	264	748.5	255.7	366.8	303.4	645	849.6	1966.6
FALSE	High	Master Protein	Q8BK64	Activator of 90 kDa heat shock protein ATPase homolog 1 OS=Mus musculus OX=10090 GN=Ahsa1 PE=1 SV=2	0	49.965	41	14	30	14	14	338	38.1	5.53	85.49	14	0	2684.7	2411.6	2089.6	1854.8	2689.2	1112.4	974.4	957.3	941.3	2836.1	1742.5	4089.4	3760.2	4131.7	2487.2	1581.8	3042.4	1430	1689.9	1340.1	1702.3	804.2	411.5	427	406.4	437	138.6	175	171.5	906	840.2	4089.4
FALSE	High	Master Protein	Q9QYI3	DnaJ homolog subfamily C member 7 OS=Mus musculus OX=10090 GN=Dnajc7 PE=1 SV=2	0	49.919	25	13	29	13	13	494	56.4	6.49	85.31	13	0	2976.4	2585.2	3387.5	2473.3	3111.3	1359.1	1457.3	1235.7	1208.7	1702.9	2206	2506.8	2312.9	3045.9	1852.6	1054	2233.4	1346.4	1183.2	795.2	1887.3	862.1	667.1	569.4	470.2	533.9	207.3	225.9	220.2	544	1063.7	2506.8
FALSE	High	Master Protein	P84084	ADP-ribosylation factor 5 OS=Mus musculus OX=10090 GN=Arf5 PE=1 SV=2	0	49.891	54	8	25	2	2	180	20.5	6.79	79.7	8	7	4314.3	3866.5	3367.2	5749.3	2401.3	1540.4	1868.6	1428.3	1388.1	2535.3	2910.5	2799	3547.6	2942.3	3526.2	1754.8	2440.8	4064.3	1884.9	1452.3	2735.6	1289.4	663.1	1323.6	362.9	605.1	265.8	261.1	252.9	809.9	1403.4	2799
FALSE	High	Master Protein	P62821	Ras-related protein Rab-1A OS=Mus musculus OX=10090 GN=Rab1A PE=1 SV=3	0	49.78	60	12	36	6	6	205	22.7	6.21	105.87	12	6	6586.4	5729.6	5599	7998.9	4674.3	4020.8	4464.1	5038.1	4129.3	3922	6275.7	5191.6	4028	3375.8	4322	2176.7	4071.4	2981.4	2955.6	4335.3	4176.3	1910.7	1102.6	1841.5	706.4	1579.5	635	921	752.3	1252.9	3026.1	5191.6
FALSE	High	Master Protein	A2ASQ1	Agrin OS=Mus musculus OX=10090 GN=Agrn PE=1 SV=1	0	49.688	8	15	23	15	15	1950	207.4	6.32	64.5	15	0	725.9	796.2	886.6	1817	1355.2	1239.7	991.9	978.6	913.9	1232.4	833.1	813.1	929.1	1092.3	1104.9	1449.6	965.2	2985.7	1643.1	1264.4	460.3	265.5	174.6	418.3	204.8	487	141.1	178.9	166.5	393.7	401.7	813.1
FALSE	High	Master Protein	P70441	Na(+)/H(+) exchange regulatory cofactor NHE-RF1 OS=Mus musculus OX=10090 GN=Slc9a3r1 PE=1 SV=3	0	49.627	45	16	26	16	16	355	38.6	5.9	59.42	16	0	1988.2	1797.4	2094.7	1437.8	1522.6	877	1328	1058.5	1121.4	2493.3	1429.9	3881.1	3658.5	4055	2294	1215.3	3134.4	1441.2	1761.2	1694	1260.7	599.4	412.5	331	230.1	344.5	188.9	193.5	204.3	796.5	689.5	3881.1
FALSE	High	Master Protein	Q9QXG4	Acetyl-coenzyme A synthetase, cytoplasmic OS=Mus musculus OX=10090 GN=Acss2 PE=1 SV=2	0	49.591	21	15	24	15	15	701	78.8	6.64	67.79	15	0	2163.6	2056.2	1590.4	629.4	852.9	514.7	428.1	1184.8	770.6	1173.2	1423.9	1667.7	1440.7	1036	650	381	1022	352.3	819.1	454.9	1371.9	685.7	313.2	144.9	128.9	202.2	60.9	216.6	140.4	374.8	686.6	1667.7
FALSE	High	Master Protein	P07214	SPARC OS=Mus musculus OX=10090 GN=Sparc PE=1 SV=1	0	49.558	36	10	26	10	10	302	34.4	4.86	82.19	10	0	2251.4	2135.1	4197.5	1128.5	4205.8	1790.6	2350.1	2410.2	1888.2	1478.5	2943.4	1365.6	2052.3	2440.2	607.4	827	1855	1119	1678.7	2485.6	1427.6	712	826.6	259.8	635.6	703.4	334.3	440.6	344	472.3	1419.3	1365.6
FALSE	High	Master Protein	Q9CY64	Biliverdin reductase A OS=Mus musculus OX=10090 GN=Blvra PE=1 SV=1	0	49.501	36	11	28	11	11	295	33.5	7.02	90.76	11	0	4514.2	4034.8	2670	9563.1	2716.3	1855.2	1205.7	1027.3	1350.3	3235.2	3036.8	5742.7	4034.1	2963.5	8414.9	1196.4	4061.3	990.7	1130.8	1112.8	2862.4	1345.5	525.8	2201.6	410.5	728.8	171.5	187.8	246	1033.5	1464.3	5742.7
FALSE	High	Master Protein	Q64331	Unconventional myosin-VI OS=Mus musculus OX=10090 GN=Myo6 PE=1 SV=1	0	49.5	11	15	24	15	15	1265	146.3	8.85	60.07	15	0	1858.3	1772.2	1518.3	1288.3	2153.2	932	699.5	784.4	751.4	1301.6	1197.7	1998	1396.2	1897.3	1545.9	846	1492.9	813.2	665.3	420.5	1178.3	591	299	296.6	325.4	366.1	99.5	143.4	136.9	415.8	577.5	1998
FALSE	High	Master Protein	Q62418	Drebrin-like protein OS=Mus musculus OX=10090 GN=Dbnl PE=1 SV=2	0	49.441	38	14	23	14	14	436	48.7	4.92	64.85	14	0	1187.2	1090.9	900.8	940.4	676.3	444.5	504.1	537.2	520.3	1219	827.5	1700.2	1369.8	1482.6	1342	619	1342.1	711.5	1077.7	699.3	752.8	363.8	177.4	216.5	102.2	174.6	71.7	98.2	94.8	389.4	399	1700.2
FALSE	High	Master Protein	Q61753	D-3-phosphoglycerate dehydrogenase OS=Mus musculus OX=10090 GN=Phgdh PE=1 SV=3	0	49.421	22	10	21	10	10	533	56.5	6.54	72.43	10	0	1802.3	1568	1296.9	1343.5	1353.2	708.4	681.2	1037.2	894.7	1619	1435.7	3222.2	1742.3	1676	1088.1	720.4	2353.5	762.4	759	785.5	1142.8	522.9	255.4	309.3	204.5	278.3	96.9	189.6	163	517.2	692.3	3222.2
FALSE	High	Master Protein	Q58A65	C-Jun-amino-terminal kinase-interacting protein 4 OS=Mus musculus OX=10090 GN=Spag9 PE=1 SV=2	0	49.347	12	17	23	13	17	1321	146.1	5.15	58.9	17	0	949.6	897.5	829.2	920.4	964.8	766	606.7	735.2	695.4	1404.9	834.1	1696.4	1241.7	1309.5	1582.8	669.3	1511.3	850.2	1053.9	1299.8	602.1	299.3	163.3	211.9	145.8	300.9	86.3	134.4	126.7	448.8	402.2	1696.4
FALSE	High	Master Protein	P60766	Cell division control protein 42 homolog OS=Mus musculus OX=10090 GN=Cdc42 PE=1 SV=2	0	49.148	48	8	32	7	7	191	21.2	6.55	99.85	8	1	1544.7	1665.8	1337	2676.1	1400.2	1058.7	1031.3	968.2	829.9	2430.7	1737.1	3670.8	3146.9	2272.8	2357.2	1136.5	2657.5	1252.5	1670.4	1759.5	979.5	555.5	263.3	616.1	211.6	415.9	146.7	177	151.2	776.5	837.6	3670.8
FALSE	High	Master Protein	Q9CX34	Protein SGT1 homolog OS=Mus musculus OX=10090 GN=Sugt1 PE=1 SV=3	0	49.134	42	13	21	13	13	336	38.1	5.45	64.87	13	0	1840.8	1661.9	1594.5	1301.4	1437.9	804.9	790.9	632.9	669.6	1863.5	1202	2361.3	2416.9	2972.5	2099.5	693.4	1777.3	1072.5	1303.4	1147.2	1167.2	554.2	314	299.6	217.3	316.2	112.5	115.7	122	595.3	579.6	2361.3
FALSE	High	Master Protein	Q9WVE8	Protein kinase C and casein kinase substrate in neurons protein 2 OS=Mus musculus OX=10090 GN=Pacsin2 PE=1 SV=1	0	49.109	28	13	22	12	13	486	55.8	5.2	68.59	13	0	3597.5	3135.2	2241.4	6606.8	2152.5	1188.6	1288.6	1041.5	1344.2	1505.1	2470.8	1958.7	1862.5	1703	3429.4	596.4	1545.8	834.7	708.7	565.8	2281.1	1045.5	441.4	1521	325.3	466.9	183.3	190.4	244.9	480.8	1191.4	1958.7
FALSE	High	Master Protein	Q9D8N0	Elongation factor 1-gamma OS=Mus musculus OX=10090 GN=Eef1g PE=1 SV=3	0	49.1	28	15	29	15	15	437	50	6.74	76.64	15	0	8250.6	7002	6277.4	4084.4	4745.1	3403	3084.8	3298.5	2605	5525	5516.1	6607.6	4975.1	5799.6	3933.9	2038	4746.8	2463.7	4019.3	5463.2	5231.6	2335	1236.2	940.3	717.1	1336.8	438.8	603	474.6	1765	2659.8	6607.6
FALSE	High	Master Protein	Q5SSL4	Active breakpoint cluster region-related protein OS=Mus musculus OX=10090 GN=Abr PE=1 SV=1	0	49.065	14	14	23	11	14	859	97.6	6.58	63.64	14	0	2074.5	1768.9	1583.3	1714	1944.7	1075	894.9	731.4	910.6	1337.3	1584.4	2062.5	1360.1	1423	1056.8	654	1651	615.9	670.9	925.3	1315.4	589.9	311.8	394.6	293.9	422.3	127.3	133.7	165.9	427.2	764	2062.5
FALSE	High	Master Protein	P16110	Galectin-3 OS=Mus musculus OX=10090 GN=Lgals3 PE=1 SV=3	0	49.019	30	8	27	8	8	264	27.5	8.38	85.02	8	0	7130.4	6474.5	5294.3	6357	5993.7	3948.3	3744.2	3223	3499.2	2925	6179.1	4341	3733.4	4194.6	1996.6	1456.9	3986.6	1494.6	2077.1	2138.5	4521.3	2159.1	1042.6	1463.5	905.8	1551	532.6	589.2	637.5	934.4	2979.5	4341
FALSE	High	Master Protein	Q62465	Synaptic vesicle membrane protein VAT-1 homolog OS=Mus musculus OX=10090 GN=Vat1 PE=1 SV=3	0	48.909	23	8	21	8	8	406	43.1	6.37	73.52	8	0	1297.9	1368.9	1472.6	1282.3	1516.6	1433.2	988.4	1159.7	1089	1028.3	1561.4	1444.7	1013.2	1197.6	735.1	785.4	1173.6	641.8	980.5	969.7	823	456.5	290	295.2	229.2	563	140.6	212	198.4	328.5	752.9	1444.7
FALSE	High	Master Protein	Q8BMJ2	Leucine--tRNA ligase, cytoplasmic OS=Mus musculus OX=10090 GN=Lars1 PE=1 SV=2	0	48.85	15	18	25	18	18	1178	134.1	7.05	58.36	18	0	1671.9	1581.5	1399.5	1198	1064.7	622.4	878.8	728.6	689.4	1841.3	1036.5	2264.9	1733.9	1875.2	2468	1181	1976.3	1495.5	1416	1057.2	1060.1	527.4	275.6	275.8	160.9	244.5	125	133.2	125.6	588.2	499.8	2264.9
FALSE	High	Master Protein	Q01768	Nucleoside diphosphate kinase B OS=Mus musculus OX=10090 GN=Nme2 PE=1 SV=1	0	48.827	61	9	32	5	5	152	17.4	7.5	82.04	9	0	1580.7	1548.2	1415.8	3715.6	1234.1	937.6	957.5	708.9	767.9	951.3	1537.6	1080.2	1271.2	940.5	1498.2	471.5	1012.7	535	628.3	744.2	1002.3	516.3	278.8	855.4	186.5	368.3	136.2	129.6	139.9	303.9	741.4	1080.2
FALSE	High	Master Protein	Q61805	Lipopolysaccharide-binding protein OS=Mus musculus OX=10090 GN=Lbp PE=1 SV=2	0	48.734	28	12	25	12	12	481	53	8.5	74.45	12	0	1939.6	2375	2516.2	3289.5	3585.8	4860.6	10532.4	8842.6	7700.4	2565	3805.1	1333.4	1661.7	1747.9	2564.3	3428.5	1836.9	4918.8	4547.7	3519.9	1229.9	792	495.5	757.3	541.9	1909.4	1498.2	1616.5	1402.9	819.4	1834.8	1333.4
FALSE	High	Master Protein	O70325	Phospholipid hydroperoxide glutathione peroxidase OS=Mus musculus OX=10090 GN=Gpx4 PE=1 SV=4	0	48.578	51	10	25	10	10	197	22.2	8.46	73.27	10	0	2828.5	2522.8	2074.4	7527.6	2429.1	1149.3	1380	1035.5	1096.7	1700.4	2285	2260.6	2592.5	1755.2	2720.5	1019.7	1724.9	947.6	1030.2	711.1	1793.5	841.3	408.5	1733	367.1	451.5	196.3	189.3	199.8	543.2	1101.8	2260.6
FALSE	High	Master Protein	Q8R5F8	Epidermal growth factor receptor kinase substrate 8-like protein 1 OS=Mus musculus OX=10090 GN=Eps8l1 PE=1 SV=1	0	48.493	21	15	23	15	15	716	80	6.28	61.43	15	0	1973.4	1947.7	1519.8	1327.9	1517.3	1190.6	1155	1064.5	983.6	1171.1	1315.9	1744.3	1280.4	1443.4	1445.8	630.7	1348.3	788.2	1066.5	620.7	1251.3	649.5	299.3	305.7	229.3	467.7	164.3	194.6	179.2	374.1	634.5	1744.3
FALSE	High	Master Protein	Q8R050	Eukaryotic peptide chain release factor GTP-binding subunit ERF3A OS=Mus musculus OX=10090 GN=Gspt1 PE=1 SV=2	0	48.455	22	15	25	5	15	636	68.6	5.21	69.49	15	0	3380	3196.6	2575.6	3212.6	2163.8	1302.3	1097.4	1158.6	1292.6	2272.6	2377.7	3204.4	2587.7	2276.9	2565.7	1091.2	2623.8	1296.5	1963.2	1348.3	2143.2	1066	507.2	739.6	327	511.6	156.1	211.8	235.5	726	1146.5	3204.4
FALSE	High	Master Protein	O09043	Napsin-A OS=Mus musculus OX=10090 GN=Napsa PE=1 SV=1	0	48.449	26	7	20	7	7	419	45.5	7.5	67.3	7	0	1159.6	1461.6	1278.1	1072	2130.7	1311.8	726.2	687.6	899.1	847.4	1115.3	1018.5	1345.1	1389.5	554.1	540.9	1190.7	491	343.9	280.6	735.3	487.4	251.7	246.8	322	515.3	103.3	125.7	163.8	270.7	537.8	1018.5
FALSE	High	Master Protein	Q6PHU5	Sortilin OS=Mus musculus OX=10090 GN=Sort1 PE=1 SV=1	0	48.379	17	14	20	14	14	825	91.1	5.88	52.48	14	0	2092.8	2771.4	3505.4	1530.7	3838.5	1923.2	1110	931	1416.1	1989.6	1693.5	2495	3262.7	3057.4	1980.7	1621.9	3020.6	1226.7	842.2	782.7	1327	924.2	690.3	352.4	580.1	755.5	157.9	170.2	258	635.6	816.6	2495
FALSE	High	Master Protein	Q99KJ8	Dynactin subunit 2 OS=Mus musculus OX=10090 GN=Dctn2 PE=1 SV=3	0	48.366	33	12	22	12	12	402	44.1	5.26	73.94	12	0	2467.8	2143.8	1994.1	2244	1719.8	974.2	958.2	825.5	888.1	1643.1	1787.5	2114.5	1846.2	1675.2	2165.5	768.6	1813.8	1005.3	1684.3	1440.3	1564.8	714.9	392.7	516.6	259.9	382.7	136.3	150.9	161.8	524.9	861.9	2114.5
FALSE	High	Master Protein	Q8R5I6	Glutathione S-transferase Mu 4 OS=Mus musculus OX=10090 GN=Gstm4 PE=1 SV=1	0	48.333	49	10	33	5	5	218	25.5	6.93	94.54	10	0	358.8	358.9	278.8	179.4	227	154	107.6	80.4	124.6	267.6	272.5	470.2	341.2	279.2	173	91.2	295.7	87.9	151	175.9	227.5	119.7	54.9	41.3	34.3	60.5	15.3	14.7	22.7	85.5	131.4	470.2
FALSE	High	Master Protein	Q9D5V5	Cullin-5 OS=Mus musculus OX=10090 GN=Cul5 PE=1 SV=3	0	48.145	18	16	25	16	16	780	90.9	7.81	65.6	16	0	1723.9	1608.5	1391.9	1844.8	1329.4	705.1	742.4	856.6	735.5	2056.9	1205.3	2534.7	2604.9	2123.4	3747.8	892	1856.1	1380	2175.7	1172.6	1093.1	536.4	274.1	424.7	200.9	277	105.6	156.6	134	657.1	581.2	2534.7
FALSE	High	Master Protein	Q99LX0	Parkinson disease protein 7 homolog OS=Mus musculus OX=10090 GN=Park7 PE=1 SV=1	0	48.136	43	9	34	9	9	189	20	6.77	97.17	9	0	7279.5	7341.2	5198.4	9391.1	3487.2	1829	1556.4	1206.2	1385.9	3740.4	5407.4	7304.4	5968.4	3950.5	3692.2	922.6	4567.7	1120.7	1327.2	1198	4615.8	2448.1	1023.7	2162	527	718.5	221.4	220.5	252.5	1194.9	2607.4	7304.4
FALSE	High	Master Protein	Q9JHI5	Isovaleryl-CoA dehydrogenase, mitochondrial OS=Mus musculus OX=10090 GN=Ivd PE=1 SV=1	0	47.996	24	10	23	10	10	424	46.3	8.29	63.69	10	0	2603.1	2520.1	2130.7	860.1	1251.3	628	609.5	812.9	731.1	1662.2	1600	2738	2624.2	1824.6	702.8	603.7	2270.3	630.6	844.3	552.9	1650.6	840.4	419.6	198	189.1	246.7	86.7	148.6	133.2	531	771.5	2738
FALSE	High	Master Protein	P24452	Macrophage-capping protein OS=Mus musculus OX=10090 GN=Capg PE=1 SV=2	0	47.913	23	7	19	7	7	352	39.2	7.2	54.72	7	0	1805	1502.4	1196.4	2207	1652.3	1195.2	949.1	857.2	813.5	1579.3	1589	2533.3	1571.5	1513.6	1480.4	1046.7	2374.7	735.7	977.8	1147.7	1144.5	501	235.6	508.1	249.7	469.5	135	156.7	148.2	504.5	766.2	2533.3
FALSE	High	Master Protein	P63085	Mitogen-activated protein kinase 1 OS=Mus musculus OX=10090 GN=Mapk1 PE=1 SV=3	0	47.86	40	13	24	9	9	358	41.2	6.98	60.23	13	0	972.9	944	772.4	943.4	879.4	526.7	500.5	382.4	478.1	1305	790.4	2203.9	1567.1	1560.1	1400	658.4	1720.8	646.9	733.8	772.1	616.9	314.8	152.1	217.2	132.9	206.9	71.2	69.9	87.1	416.9	381.1	2203.9
FALSE	High	Master Protein	Q9Z1Z2	Serine-threonine kinase receptor-associated protein OS=Mus musculus OX=10090 GN=Strap PE=1 SV=2	0	47.739	34	9	16	9	9	350	38.4	5.12	55.89	9	0	2216.7	2110.2	1976.4	2083.2	1874.6	1215	1189.5	797.6	929.8	1833.4	1772.5	2306	2197.6	2307.1	1776.4	884.7	1945	1173.3	810	1064.3	1405.6	703.7	389.2	479.6	283.3	477.3	169.2	145.8	169.4	585.7	854.7	2306
FALSE	High	Master Protein	P01878	Ig alpha chain C region OS=Mus musculus OX=10090 PE=1 SV=1	0	47.661	30	6	19	6	6	344	36.9	5.06	80.11	6	0	521.9	746.4	1782.9	2781.7	1244.7	5027.3	3765.3	7025.9	4253.9	266.4	2900.7	52.7	79.7	88.2	1328.4	886.1	116.1	786.5	226.4	184.7	330.9	248.9	351.1	640.4	188.1	1974.9	535.6	1284.4	775	85.1	1398.7	52.7
FALSE	High	Master Protein	O35887	Calumenin OS=Mus musculus OX=10090 GN=Calu PE=1 SV=1	0	47.634	39	10	20	10	10	315	37	4.67	66.93	10	0	870.2	919.1	1232.4	459.6	1812.4	357.9	532.9	718.8	446.8	1001.7	925.6	1247.7	1704	1895.7	1092.3	393.4	1825.2	974.3	1021.1	987.2	551.8	306.5	242.7	105.8	273.9	140.6	75.8	131.4	81.4	320	446.3	1247.7
FALSE	High	Master Protein	O08749	Dihydrolipoyl dehydrogenase, mitochondrial OS=Mus musculus OX=10090 GN=Dld PE=1 SV=2	0	47.547	27	13	24	13	13	509	54.2	7.9	64.78	13	0	3611.2	3316	3346.9	1040.7	2431.8	787.6	931.5	634.5	940.8	2822	2027.4	4728.5	4090.9	3611.7	1025.4	1151.8	4216.5	1047.5	1273.4	1077	2289.8	1105.8	659.1	239.6	367.5	309.4	132.5	116	171.4	901.5	977.6	4728.5
FALSE	High	Master Protein	Q9CQI6	Coactosin-like protein OS=Mus musculus OX=10090 GN=Cotl1 PE=1 SV=3	0	47.469	75	11	36	11	11	142	15.9	5.4	99.74	11	0	5734.6	4370	3458.6	4299.4	5599.3	2518.4	1558.6	1666.8	1842.1	4416.6	4554.6	9491.1	4168	4259.1	2360	1772.3	7052.6	1343	1904.5	1492	3636.2	1457.3	681.1	989.8	846.2	989.3	221.7	304.7	335.6	1410.9	2196.2	9491.1
FALSE	High	Master Protein	P47877	Insulin-like growth factor-binding protein 2 OS=Mus musculus OX=10090 GN=Igfbp2 PE=2 SV=2	0	47.469	35	8	19	8	8	305	32.8	7.64	62.06	8	0	243.7	253.4	308.7	332.3	296.4	750.4	180	345.2	331.5	2331.2	334.1	1469.5	2687.7	2497.3	3727.2	4475.9	2510.5	3433.7	2486.7	1185.3	154.5	84.5	60.8	76.5	44.8	294.8	25.6	63.1	60.4	744.7	161.1	1469.5
FALSE	High	Master Protein	P11835	Integrin beta-2 OS=Mus musculus OX=10090 GN=Itgb2 PE=1 SV=2	0	47.422	19	14	23	14	14	771	85	7.12	67.93	14	0	1041.2	1138.9	975	934.3	1331.3	928.9	1885.5	1711.1	1334.9	1853.5	1341.2	1808.8	1755.5	1607.5	1848.4	1387.6	2052	1754.7	1763.3	2501.4	660.2	379.8	192	215.1	201.2	364.9	268.2	312.8	243.2	592.1	646.7	1808.8
FALSE	High	Master Protein	Q9DCS2	Methyltransferase-like 26 OS=Mus musculus OX=10090 GN=Mettl26 PE=1 SV=1	0	47.356	51	11	26	11	11	204	22.7	6.52	83.47	11	0	1889.8	1892.2	1383.8	1770.9	972	589.3	537.8	382.9	460	2394.1	1307.8	3659.4	3129.7	2067.1	1847.5	1641.6	2255	1344.7	1566.2	1339	1198.3	631	272.5	407.7	146.9	231.5	76.5	70	83.8	764.8	630.6	3659.4
FALSE	High	Master Protein	Q8BG05	Heterogeneous nuclear ribonucleoprotein A3 OS=Mus musculus OX=10090 GN=Hnrnpa3 PE=1 SV=1	0	47.148	27	10	27	8	8	379	39.6	9.01	76.2	10	1	1687.9	1270	1612.8	1141.5	1109.7	460.5	572.9	513.7	492.4	1885.4	1047.5	2420.4	2549	3089.2	1081.1	987.6	2338.7	815.8	657.7	923.3	1070.3	423.5	317.6	262.8	167.7	180.9	81.5	93.9	89.7	602.3	505.1	2420.4
FALSE	High	Master Protein	P46735	Unconventional myosin-Ib OS=Mus musculus OX=10090 GN=Myo1b PE=1 SV=3	0	47.129	11	14	20	12	14	1107	128.5	9.26	54.82	14	0	2239.6	1758.7	1322.3	5506.9	1273.8	1343.6	1680.2	1551.9	2008.9	969.5	2090	634.8	750.7	1076.8	3446.2	495.6	565.8	879.5	923.2	944.6	1420.1	586.5	260.4	1267.8	192.5	527.8	239	283.7	366	309.7	1007.8	634.8
FALSE	High	Master Protein	P12246	Serum amyloid P-component OS=Mus musculus OX=10090 GN=Apcs PE=1 SV=2	0	47.112	33	8	34	8	8	224	26.2	6.35	106.14	8	0	996.7	1136.8	2106.9	2106.7	2261.7	2860.5	11135.6	15004.8	9588	2031.3	4894.1	258.6	571.1	333.1	284.3	371.5	257.6	2853.1	4538.6	7590.7	632	379.1	414.9	485	341.8	1123.7	1584	2743	1746.8	648.9	2359.9	258.6
FALSE	High	Master Protein	P53994	Ras-related protein Rab-2A OS=Mus musculus OX=10090 GN=Rab2a PE=1 SV=1	0	47.046	46	9	18	3	9	212	23.5	6.54	63.05	9	0	2048.9	2000.1	1778.8	1594.1	1211.6	1065.6	1086.1	1223.1	971	1368.9	1675.5	1936	1361.4	1156	1504.3	543.1	1479.7	771.8	835.9	1236.5	1299.2	667	350.3	367	183.1	418.6	154.5	223.6	176.9	437.3	807.9	1936
FALSE	High	Master Protein	Q7TMB8	Cytoplasmic FMR1-interacting protein 1 OS=Mus musculus OX=10090 GN=Cyfip1 PE=1 SV=1	0	47.009	10	13	18	7	13	1253	145.1	6.9	49.54	13	0	848.9	795.9	703.3	1023.8	790.1	608.7	591.9	568.4	581.8	1336	780.2	1101.4	1639.7	1718.5	1694.6	903.7	1141.2	1008.7	1160.9	1442.6	538.3	265.4	138.5	235.7	119.4	239.1	84.2	103.9	106	426.8	376.2	1101.4
FALSE	High	Master Protein	Q8BH95	Enoyl-CoA hydratase, mitochondrial OS=Mus musculus OX=10090 GN=Echs1 PE=1 SV=1	0	46.984	37	11	25	11	11	290	31.5	8.48	78.67	11	0	4036.7	3806.6	3151.9	1413.4	1788.6	1274.6	1433.4	1650.4	1563.2	2814.2	2303.2	4539.7	3740.4	2964.3	1265.8	1143.8	3980.4	829.6	1261.5	977.5	2559.6	1269.4	620.7	325.4	270.3	500.7	203.9	301.7	284.8	899	1110.6	4539.7
FALSE	High	Master Protein	Q9ER72	Cysteine--tRNA ligase, cytoplasmic OS=Mus musculus OX=10090 GN=Cars1 PE=1 SV=2	0	46.971	17	15	22	15	15	831	94.8	6.76	58.83	15	0	1437.7	1469.7	1184.7	922.2	1096.4	608.1	580.7	441.4	458.9	1739.8	1167.8	3125.2	1803.5	1793.6	1191.9	651.8	1951.2	743.4	909.3	1010.3	911.6	490.1	233.3	212.3	165.7	238.9	82.6	80.7	83.6	555.8	563.1	3125.2
FALSE	High	Master Protein	P47753	F-actin-capping protein subunit alpha-1 OS=Mus musculus OX=10090 GN=Capza1 PE=1 SV=4	0	46.964	43	8	16	6	6	286	32.9	5.55	55.26	8	0	722.6	697.8	718	734.5	882.1	483.2	465.4	417.4	354.6	401.9	746	656.7	576.8	599.2	294.6	194.2	472.2	166.3	255.8	368.4	458.2	232.7	141.4	169.1	133.3	189.8	66.2	76.3	64.6	128.4	359.7	656.7
FALSE	High	Master Protein	Q99MN1	Lysine--tRNA ligase OS=Mus musculus OX=10090 GN=Kars1 PE=1 SV=1	0	46.928	25	15	24	15	15	595	67.8	5.94	66.4	15	0	3033	2219.1	2390.2	1652.3	1902.4	1148.6	1374.4	1643.8	1328.3	2160.2	2389.9	3113.3	1969.1	2185.5	1568.8	1110.2	2298.5	1167.2	1646.6	1999.3	1923.2	740	470.7	380.4	287.5	451.2	195.5	300.5	242	690.1	1152.4	3113.3
FALSE	High	Master Protein	P19973	Lymphocyte-specific protein 1 OS=Mus musculus OX=10090 GN=Lsp1 PE=1 SV=2	0	46.865	38	10	30	10	10	330	36.7	4.82	82.67	10	0	806.4	594	479.9	598.1	931	516.5	463.3	606.1	455	1284.4	991.9	1797.4	1416.9	1273.6	760.8	1056.9	1752.9	958.8	1075.6	950.9	511.3	198.1	94.5	137.7	140.7	202.9	65.9	110.8	82.9	410.3	478.3	1797.4
FALSE	High	Master Protein	Q9JIF7	Coatomer subunit beta OS=Mus musculus OX=10090 GN=Copb1 PE=1 SV=1	0	46.833	14	14	21	14	14	953	107	6	55.18	14	0	1520	1351.2	1212.1	1255.3	1300.9	1041.7	891.4	866.5	886.5	1060.2	1275.8	1001.8	768.3	934.8	1208.3	657.7	962.4	660.7	884.8	1109.6	963.8	450.6	238.7	289	196.6	409.2	126.8	158.4	161.5	338.7	615.2	1001.8
FALSE	High	Master Protein	Q3U0V1	Far upstream element-binding protein 2 OS=Mus musculus OX=10090 GN=Khsrp PE=1 SV=2	0	46.797	21	17	29	14	14	748	76.7	7.33	72.49	17	3	2854.4	2315.9	3020.4	1471.6	3567.2	1619.8	1855.2	1781.6	1612.6	2038.5	1975.2	2675.9	2214.8	3110.4	1451.9	1296.4	2192.2	1213.8	1840.2	2153.2	1809.9	772.3	594.8	338.8	539.1	636.3	263.9	325.7	293.8	651.2	952.4	2675.9
FALSE	High	Master Protein	Q8BWY3	Eukaryotic peptide chain release factor subunit 1 OS=Mus musculus OX=10090 GN=Etf1 PE=1 SV=4	0	46.499	28	11	19	11	11	437	49	5.71	54.99	11	0	2175.6	2001	1600.6	1901.7	1545.1	866.8	1052.4	955.1	920.5	297.1	1593.8	411.9	264.2	227.8	171.6	98.5	300.7	134.4	163.5	188.6	1379.5	667.3	315.2	437.8	233.5	340.5	149.7	174.6	167.7	94.9	768.5	411.9
FALSE	High	Master Protein	Q8CIZ8	von Willebrand factor OS=Mus musculus OX=10090 GN=Vwf PE=1 SV=2	0	46.491	5	16	24	16	16	2813	309.1	5.5	56.45	16	0	594.1	806.7	1034.4	1162.4	1537.1	2073.2	1444.7	1752.7	1646.7	2113	1180.4	971	1297.6	1326.6	3781.5	3260.6	1290.5	3369.1	2956.3	2651.9	376.7	269	203.7	267.6	232.3	814.4	205.5	320.4	300	675	569.2	971
FALSE	High	Master Protein	Q61656	Probable ATP-dependent RNA helicase DDX5 OS=Mus musculus OX=10090 GN=Ddx5 PE=1 SV=2	0	46.441	19	13	23	8	8	614	69.2	8.92	60.63	13	5	2815.6	1790.5	1806.8	1466.4	2165.8	800.1	1021.5	918.4	844.7	2774.4	1653.5	3813.4	2552.5	2924.3	1859.2	2072.3	3405.8	2027.8	1657.1	1806.2	1785.3	597.1	355.8	337.6	327.3	314.3	145.3	167.9	153.9	886.3	797.3	3813.4
FALSE	High	Master Protein	Q8K0C9	GDP-mannose 4,6 dehydratase OS=Mus musculus OX=10090 GN=Gmds PE=1 SV=1	0	46.422	35	14	27	14	14	372	42	7.03	76.76	14	0	4003.4	3940.3	3555.1	2214.4	3061	1536.3	1090.4	1198	1287.1	1089.7	3024.3	1566.2	1149.6	1313.6	879.1	621.2	1396.3	571.1	1024.6	645.1	2538.5	1314	700.1	509.8	462.6	603.5	155.1	219	234.5	348.1	1458.3	1566.2
FALSE	High	Master Protein	P59242	Cingulin OS=Mus musculus OX=10090 GN=Cgn PE=1 SV=1	0	46.419	12	15	22	15	15	1191	136.4	5.91	51.88	15	0	869.3	772.5	969.9	1118.5	822.5	623.7	714.3	623.6	624.6	959.8	830.8	1251.7	1010.5	1024.6	1382.2	687.6	1002	1076.8	1209.1	1001.7	551.2	257.6	191	257.5	124.3	245	101.6	114	113.8	306.6	400.6	1251.7
FALSE	High	Master Protein	P62702	40S ribosomal protein S4, X isoform OS=Mus musculus OX=10090 GN=Rps4x PE=1 SV=2	0	46.393	44	11	22	11	11	263	29.6	10.15	69.83	11	0	3094.2	3358.9	3715.6	2671.8	3413.1	1536.3	1415.8	1316.1	1487.5	1541.1	2342	1811.3	2028.5	2290.8	1351.4	1035.8	1489.3	1192.2	924.6	792.7	1962	1120.1	731.7	615.1	515.8	603.5	201.4	240.6	271	492.3	1129.3	1811.3
FALSE	High	Master Protein	Q9D8U8	Sorting nexin-5 OS=Mus musculus OX=10090 GN=Snx5 PE=1 SV=1	0	46.384	29	12	22	12	12	404	46.8	6.62	67.79	12	0	2040.6	1545.5	1838.7	1812.2	1496.8	925.6	755.7	759.8	828.3	2233.5	1673.4	3872.9	2248.2	6132.7	2430.6	1065	3013.1	1076.8	1079.8	1376.6	1293.9	515.4	362.1	417.2	226.2	363.6	107.5	138.9	150.9	713.5	806.9	3872.9
FALSE	High	Master Protein	Q9DBG5	Perilipin-3 OS=Mus musculus OX=10090 GN=Plin3 PE=1 SV=1	0	46.366	31	11	17	11	11	437	47.2	5.62	66.99	11	0	1807.6	1841.8	1503.6	2598	1441.2	1094.6	838	798.1	782.7	1244	1415	1801.5	1673.2	1498.1	1632.4	785.4	1381.7	1333.5	996.6	885.6	1146.2	614.2	296.1	598.1	217.8	430	119.2	145.9	142.6	397.4	682.3	1801.5
FALSE	High	Master Protein	O35459	Delta(3,5)-Delta(2,4)-dienoyl-CoA isomerase, mitochondrial OS=Mus musculus OX=10090 GN=Ech1 PE=1 SV=1	0	46.322	32	10	18	10	10	327	36.1	7.71	46.96	10	0	2288.2	1676.9	1302.5	1058.6	1333.3	571.7	646.1	608.3	749.2	737.5	1461.9	1336.4	2422.1	1803.4	433.5	531.4	1383.8	393.7	468.3	358.8	1450.9	559.2	256.5	243.7	201.5	224.6	91.9	111.2	136.5	235.6	704.9	1336.4
FALSE	High	Master Protein	P20852	Cytochrome P450 2A5 OS=Mus musculus OX=10090 GN=Cyp2a5 PE=2 SV=1	0	46.295	21	10	21	1	10	494	56.7	9.2	56.02	10	0	2392.4	2063.4	3146.3	1006.9	1512	683.2	587.7	800.8	673.5	417.3	1161.2	514.7	692.2	428.6	325.9	484.7	446.1	316.1	148.2	100.4	1517	688.1	619.6	231.8	228.5	268.4	83.6	146.4	122.7	133.3	559.9	514.7
FALSE	High	Master Protein	Q8BP47	Asparagine--tRNA ligase, cytoplasmic OS=Mus musculus OX=10090 GN=NARS1 PE=1 SV=2	0	46.268	20	11	22	11	11	559	64.2	5.86	68.38	11	0	2309	1972.9	2063.7	1502	1175.8	831.1	736	756	1093.9	2580.6	1554.8	3853.5	2924.1	2788.8	2366.5	1650.4	2767.1	1572.1	1495.6	1575.4	1464.1	657.9	406.4	345.8	177.7	326.5	104.7	138.2	199.3	824.4	749.7	3853.5
FALSE	High	Master Protein	Q9D906	Ubiquitin-like modifier-activating enzyme ATG7 OS=Mus musculus OX=10090 GN=Atg7 PE=1 SV=1	0	46.229	22	14	18	14	14	698	77.5	6.4	45.6	14	0	923.4	883.7	871.4	1498.6	987.3	632.3	743.8	466.6	623.5	949.7	829.3	1262.2	982.8	880.1	1431.3	483.2	1012.4	510	572.4	695.2	585.5	294.7	171.6	345	149.2	248.4	105.8	85.3	113.6	303.4	399.9	1262.2
FALSE	High	Master Protein	P97361	BPI fold-containing family A member 1 OS=Mus musculus OX=10090 GN=Bpifa1 PE=1 SV=3	0	46.207	27	5	22	5	5	278	28.6	6.51	91.75	5	0	4170.6	4811.4	13996.5	2547.6	5467	2959.5	4553.4	5245.9	6553.7	2584.4	3630.9	754.3	3626.4	12707.9	1017.5	7827.8	1846.2	3975.5	2414.7	611.1	2644.5	1604.5	2756.3	586.5	826.2	1162.6	647.7	959	1194	825.6	1750.8	754.3
FALSE	High	Master Protein	Q9WVH9	Fibulin-5 OS=Mus musculus OX=10090 GN=Fbln5 PE=1 SV=1	0	46.022	22	9	23	9	9	448	50.2	4.7	72.26	9	0	674.4	815.4	1149.7	1658.9	1443.8	2274.8	2849.3	2254.3	1891.5	1952.7	1431.8	1213.7	2228	1481.7	1242.4	1661.3	1674.9	3239.9	3089.1	1988.2	427.6	271.9	226.4	381.9	218.2	893.6	405.3	412.1	344.6	623.8	690.4	1213.7
FALSE	High	Master Protein	Q8QZT1	Acetyl-CoA acetyltransferase, mitochondrial OS=Mus musculus OX=10090 GN=Acat1 PE=1 SV=1	0	45.851	27	11	26	11	11	424	44.8	8.51	80.76	11	0	5525.9	4933.2	7723.7	1344.4	2860.5	1173.3	1041.1	967.7	1332.2	2733.7	3113.9	4737.7	4204.5	4682.8	1033.4	959.9	3420.3	839	1125.9	1454.4	3503.9	1645.1	1521	309.5	432.3	460.9	148.1	176.9	242.7	873.3	1501.5	4737.7
FALSE	High	Master Protein	Q8BKC5	Importin-5 OS=Mus musculus OX=10090 GN=Ipo5 PE=1 SV=3	0	45.817	13	13	25	13	13	1097	123.5	4.93	60	13	0	1027.3	1066.6	911	979.5	945.6	800.9	763.5	681	634	1336	1021	1404	944.9	1042.5	1801.2	848.9	1272.1	1052.7	1197.2	1568.4	651.4	355.7	179.4	225.5	142.9	314.6	108.6	124.5	115.5	426.8	492.3	1404
FALSE	High	Master Protein	Q80UG5	Septin-9 OS=Mus musculus OX=10090 GN=Septin9 PE=1 SV=1	0	45.817	24	15	22	15	15	583	65.5	8.9	64.57	15	0	3616.9	1935.7	2340.5	1601.1	2841.4	1990.9	1261.9	1433.7	2094.6	1136	2064.3	1481.6	1282.6	1644.2	1037.1	806.6	1491.6	884.7	1014.1	832.4	2293.4	645.5	460.9	368.6	429.4	782.1	179.5	262.1	381.6	362.9	995.4	1481.6
FALSE	High	Master Protein	P11152	Lipoprotein lipase OS=Mus musculus OX=10090 GN=Lpl PE=1 SV=3	0	45.679	24	11	26	10	10	474	53.1	7.87	88.67	11	1	2678.8	3931	4194.4	3007.6	5025.6	2912.4	1585.3	1311.8	1956.8	2766	2888.7	2620.2	3970.7	4033.8	3397.1	3292	4303.1	1666	1525	1853.6	1698.6	1310.9	826	692.4	759.5	1144.1	225.5	239.8	356.5	883.6	1392.9	2620.2
FALSE	High	Master Protein	Q91VR5	ATP-dependent RNA helicase DDX1 OS=Mus musculus OX=10090 GN=Ddx1 PE=1 SV=1	0	45.656	19	15	23	15	15	740	82.4	7.21	57.34	15	0	2146.6	1795.9	2344	1511.2	2021.5	928.6	905.5	900.9	1221.3	2618.8	1484.7	2894.1	3338.4	4575	3126.4	1732.1	2557.7	1876.2	1478.9	1366.4	1361.1	598.9	461.6	347.9	305.5	364.8	128.8	164.7	222.5	836.6	715.9	2894.1
FALSE	High	Master Protein	P32848	Parvalbumin alpha OS=Mus musculus OX=10090 GN=Pvalb PE=1 SV=3	0	45.637	77	10	23	10	10	110	11.9	5.19	68.49	10	0	4284.9	8688.5	16541.1	3165.2	1493.5	1073.7	10966.9	4941.8	3500.8	2142.1	3137.1	1397.9	1985.4	5434.7	594.8	606.6	1168.9	2245.8	4094.8	2052.6	2717	2897.4	3257.4	728.7	225.7	421.8	1560	903.4	637.8	684.3	1512.7	1397.9
FALSE	High	Master Protein	Q9QUI0	Transforming protein RhoA OS=Mus musculus OX=10090 GN=Rhoa PE=1 SV=1	0	45.458	42	7	31	2	2	193	21.8	6.1	90.53	7	6	2276.8	2555.8	2327.3	4556.5	1720.4	1283.8	1389.1	1287.1	1379.4	2623.8	2358.4	3705.6	3805.6	2807.6	4012	1357.7	2982.2	2037.3	1843	1755.2	1443.7	852.3	458.3	1049	260	504.3	197.6	235.3	251.3	838.2	1137.2	3705.6
FALSE	High	Master Protein	O35640	Annexin A8 OS=Mus musculus OX=10090 GN=Anxa8 PE=1 SV=2	0	45.447	40	14	24	14	14	327	36.7	5.94	69.97	14	0	5196.2	3706.1	3540.9	2092.8	4964.8	1360.6	1768.1	1100.1	1510	3513.8	2645.4	4491.7	5032.7	8061.8	2193	1780.3	4480.9	2039	2332.2	1528.7	3294.8	1235.9	697.3	481.8	750.3	534.5	251.5	201.1	275.1	1122.5	1275.6	4491.7
FALSE	High	Master Protein	P99026	Proteasome subunit beta type-4 OS=Mus musculus OX=10090 GN=Psmb4 PE=1 SV=1	0	45.394	48	8	26	8	8	264	29.1	5.64	73.26	8	0	1365.3	1418.1	1108.5	1052.9	1313.5	1051.9	898.4	730.3	885.9	1400.2	1248.9	1616.5	1447.3	1485	1033.9	903.7	1529.7	1051	1335.6	1458.5	865.7	472.9	218.3	242.4	198.5	413.2	127.8	133.5	161.4	447.3	602.2	1616.5
FALSE	High	Master Protein	P62806	Histone H4 OS=Mus musculus OX=10090 GN=H4c1 PE=1 SV=2	0	45.374	58	7	23	7	7	103	11.4	11.36	69.81	7	0	2215.8	2038.2	1790	3058.8	3458.1	1805.1	7655.7	4679.8	4174.3	2577.8	2458.4	3153.9	2176	2311.2	2320.7	3521.2	3933	2209.6	1768.9	1903.2	1405	679.7	352.5	704.2	522.6	709.1	1089	855.5	760.5	823.5	1185.4	3153.9
FALSE	High	Master Protein	P70122	Ribosome maturation protein SBDS OS=Mus musculus OX=10090 GN=Sbds PE=1 SV=4	0	45.333	52	13	23	13	13	250	28.8	8.76	64.01	13	0	2335.8	2218.8	1540.7	2400.8	1607.9	998.6	1147.3	893.8	975.4	1793.7	1728.4	3010.2	2246.9	2402.6	2448.3	1061.3	2210.6	1287.8	1405.5	1025.3	1481.1	739.9	303.4	552.7	243	392.3	163.2	163.4	177.7	573	833.4	3010.2
FALSE	High	Master Protein	P05201	Aspartate aminotransferase, cytoplasmic OS=Mus musculus OX=10090 GN=Got1 PE=1 SV=3	0	45.297	35	15	25	15	15	413	46.2	7.14	66.03	15	0	2361	3457.2	3116.9	1732.3	2141.3	1371.3	1175.4	1388.3	5058.6	3853.4	3455.9	3289	3614.9	3341.5	1719.8	1299.3	2813	1308.5	1743	2571.7	1497.1	1152.9	613.8	398.8	323.6	538.7	167.2	253.8	921.6	1231	1666.4	3289
FALSE	High	Master Protein	P45952	Medium-chain specific acyl-CoA dehydrogenase, mitochondrial OS=Mus musculus OX=10090 GN=Acadm PE=1 SV=1	0	45.273	28	11	22	11	11	421	46.5	8.37	64.29	11	0	916.9	694.8	799.3	684.1	787.4	348.8	390.2	355.6	460.5	2379.1	525.3	3573.4	3692.9	3109.6	1367.3	1056.2	2790.2	889.9	863.8	642.6	581.4	231.7	157.4	157.5	119	137	55.5	65	83.9	760	253.3	3573.4
FALSE	High	Master Protein	Q9CR16	Peptidyl-prolyl cis-trans isomerase D OS=Mus musculus OX=10090 GN=Ppid PE=1 SV=3	0	45.265	28	11	19	10	10	370	40.7	7.43	59.53	11	1	2843.9	2678.8	2358.7	1389.1	1977.2	851.8	674.2	783.3	696.5	1989.3	1867.3	2794.8	2718.9	2894.9	1197.1	1382.5	2032.3	1027.7	1239.8	1052.5	1803.3	893.3	464.5	319.8	298.8	334.6	95.9	143.2	126.9	635.5	900.4	2794.8
FALSE	High	Master Protein	P07744	Keratin, type II cytoskeletal 4 OS=Mus musculus OX=10090 GN=Krt4 PE=1 SV=2	0	45.255	18	12	21	6	6	525	56.2	8.15	51.74	12	1	312.9	371.2	2206.9	755.4	643.2	992.5	588.4	565.1	732.2	748.1	716.9	1418.3	1091.5	1600.9	316.1	404.4	1111.4	388.5	858.2	364.3	198.4	123.8	434.6	173.9	97.2	389.9	83.7	103.3	133.4	239	345.7	1418.3
FALSE	High	Master Protein	Q9CZ30	Obg-like ATPase 1 OS=Mus musculus OX=10090 GN=Ola1 PE=1 SV=1	0	45.251	30	12	24	12	12	396	44.7	7.81	68.78	12	0	2290.5	2120.1	1570.1	1915.6	1158	704.6	567.3	588.6	743.2	2177.5	1446.1	3308.6	3044.7	2542.2	2685	851.8	2230.6	1057	959.6	977.5	1452.4	707	309.2	441	175	276.8	80.7	107.6	135.4	695.6	697.3	3308.6
FALSE	High	Master Protein	Q9D8Y0	EF-hand domain-containing protein D2 OS=Mus musculus OX=10090 GN=Efhd2 PE=1 SV=1	0	45.187	41	10	17	7	10	240	26.8	5.06	56.02	10	0	2376.7	1901.5	1766.6	1760.1	2016.2	1008.1	923.7	1004.3	770.6	1498.2	1977.6	1984.3	2444.6	2030.4	1303.7	992.7	1780.1	934.7	1014.8	1190.5	1507	634.1	347.9	405.2	304.7	396	131.4	183.6	140.4	478.6	953.6	1984.3
FALSE	High	Master Protein	Q60598	Src substrate cortactin OS=Mus musculus OX=10090 GN=Cttn PE=1 SV=2	0	45.172	22	14	31	14	14	546	61.2	5.4	79.26	14	0	3860.8	3704	3430.7	3750.8	2571.4	1384.8	1663.3	1525.1	1499.6	3475.6	2505	4108.7	4994.9	5990.7	3794.6	1320.4	3109.5	2297.5	2350.4	1314.5	2448.1	1235.2	675.6	863.5	388.6	544	236.6	278.8	273.2	1110.3	1207.9	4108.7
FALSE	High	Master Protein	Q66JS6	Eukaryotic translation initiation factor 3 subunit J-B OS=Mus musculus OX=10090 GN=Eif3j2 PE=1 SV=1	0	45.106	44	10	19	0	10	263	29.5	4.81	59.09	10	0	1846.4	1282.3	1211.1	1230.1	890	454.4	395.1	384	413.9	1387	1361.7	2716.5	1859	1416.4	854.3	510.2	1868.2	449.7	552.8	495.1	1170.8	427.6	238.5	283.2	134.5	178.5	56.2	70.2	75.4	443.1	656.6	2716.5
FALSE	High	Master Protein	P57776	Elongation factor 1-delta OS=Mus musculus OX=10090 GN=Eef1d PE=1 SV=3	0	45.055	41	11	25	11	11	281	31.3	5.02	67.58	11	0	2008.3	1694.3	1906.8	1692.7	1455.7	876.7	967.3	1598.4	992.4	1582.1	1516	2075.8	1690.8	1944.6	1848.4	735.8	1773.9	1084.6	1416	1263.5	1273.4	565	375.5	389.7	220	344.4	137.6	292.2	180.8	505.4	731	2075.8
FALSE	High	Master Protein	Q9D379	Epoxide hydrolase 1 OS=Mus musculus OX=10090 GN=Ephx1 PE=1 SV=2	0	45.049	29	14	20	14	14	455	52.5	8.35	57.44	14	0	2930.7	2799.3	2495.8	1655.8	2123.4	1523.3	1309	1180.5	1424.4	1118.8	1768.8	1438.5	1050.6	858	1241.5	904.4	1396.3	939.8	807.9	541.5	1858.3	933.5	491.5	381.2	320.9	598.4	186.2	215.8	259.5	357.4	852.9	1438.5
FALSE	High	Master Protein	Q9WUA3	ATP-dependent 6-phosphofructokinase, platelet type OS=Mus musculus OX=10090 GN=Pfkp PE=1 SV=1	0	44.923	18	15	24	11	11	784	85.4	7.11	66.24	15	0	1148.7	997.1	937.9	1097.2	1436.6	870.6	703	728.1	937	1442.5	989	2076.1	1560.9	1878.5	1513.2	995.6	1835.3	900.2	1232.1	1100.8	728.4	332.5	184.7	252.6	217.1	342	100	133.1	170.7	460.8	476.9	2076.1
FALSE	High	Master Protein	Q9DBR7	Protein phosphatase 1 regulatory subunit 12A OS=Mus musculus OX=10090 GN=Ppp1r12a PE=1 SV=2	0	44.897	15	17	20	15	17	1029	114.9	5.49	45.71	17	0	1779.4	1336.2	1434	1577.6	1468.3	1097.4	1272.4	1118.1	1468.3	999.2	1403	1169.8	995.1	1024.6	971.2	521.2	1077.5	649.5	1135.7	833.5	1128.3	445.6	282.4	363.2	221.9	431.1	181	204.4	267.5	319.2	676.5	1169.8
FALSE	High	Master Protein	P16015	Carbonic anhydrase 3 OS=Mus musculus OX=10090 GN=Ca3 PE=1 SV=3	0	44.852	42	10	22	10	10	260	29.3	7.37	58.38	10	0	4632.7	6701.2	6159.6	953.4	1349.9	625	1211.3	713.3	857.9	2941.9	1699.3	2367.2	2401	4344	1203.6	627	2076.1	635.7	799.5	772.8	2937.5	2234.7	1213	219.5	204	245.5	172.3	130.4	156.3	939.8	819.4	2367.2
FALSE	High	Master Protein	Q64475	Histone H2B type 1-B OS=Mus musculus OX=10090 GN=H2bc3 PE=1 SV=3	0	44.826	58	9	32	0	1	126	13.9	10.32	84.47	9	9	4546.6	3613.5	3047.3	6591.1	7499.1	2988.1	13025.2	8327.8	6420.4	5678.4	5151.3	9785.5	4913.4	4916.3	4374.4	4957.7	7738.4	2888.4	2639.7	2579.6	2882.9	1205	600.1	1517.4	1133.3	1173.8	1852.8	1522.4	1169.7	1814	2483.9	9785.5
FALSE	High	Master Protein	Q9WVJ2	26S proteasome non-ATPase regulatory subunit 13 OS=Mus musculus OX=10090 GN=Psmd13 PE=1 SV=1	0	44.816	33	13	21	13	13	376	42.8	5.71	57.76	13	0	3542.9	3134.6	2703.5	2219.6	2419.2	1610.6	1386.3	1181	1432.6	3793.3	2791.8	4897.4	3271.1	3414.9	3644.5	1931.4	3734.4	1718.6	2486.7	3843.4	2246.5	1045.3	532.4	511	365.6	632.7	197.2	215.9	261	1211.8	1346.2	4897.4
FALSE	High	Master Protein	Q8BUV3	Gephyrin OS=Mus musculus OX=10090 GN=Gphn PE=1 SV=2	0	44.811	15	10	17	10	10	769	83.2	5.6	53.44	10	0	1747.2	1622.3	1479.7	1088.1	1199	863.2	621.5	603.4	665.8	1276.5	1216.9	1918.3	1447.7	1514.4	1209.2	608.8	1449.7	679.7	604.5	627.5	1107.9	541	291.4	250.5	181.2	339.1	88.4	110.3	121.3	407.8	586.8	1918.3
FALSE	High	Master Protein	Q8BJY1	26S proteasome non-ATPase regulatory subunit 5 OS=Mus musculus OX=10090 GN=Psmd5 PE=1 SV=4	0	44.789	29	13	20	12	13	504	55.9	5.21	57.86	13	0	1124.8	1135.6	1149.7	1341.3	694.8	522.1	534.3	379.1	412.2	1251.2	814.8	1665.3	1118.8	953.5	1826.9	1220.4	1365.7	688.3	697.5	867.1	713.2	378.7	226.4	308.8	105	205.1	76	69.3	75.1	399.7	392.9	1665.3
FALSE	High	Master Protein	Q64525	Histone H2B type 2-B OS=Mus musculus OX=10090 GN=Hist2h2bb PE=1 SV=3	0	44.752	58	9	32	0	1	126	13.9	10.32	83.85	9	0	137.8	151.7	133.6	208.5	251.4	155.5	299.5	225.4	206.4	339.6	162.4	480.3	286.6	344.5	344.2	306.6	463.4	491	404.7	214.9	87.4	50.6	26.3	48	38	61.1	42.6	41.2	37.6	108.5	78.3	480.3
FALSE	High	Master Protein	P53811	Phosphatidylinositol transfer protein beta isoform OS=Mus musculus OX=10090 GN=Pitpnb PE=1 SV=2	0	44.458	42	12	26	9	9	271	31.5	6.95	76.33	12	0	1634.5	1493.7	1382.2	1803.9	1280.4	787.1	684	649.9	674	1386.4	1483	2359.4	1866.5	1310.3	1271.9	556.2	1673.6	697.8	890.4	829.7	1036.4	498.1	272.2	415.3	193.5	309.2	97.3	118.8	122.8	442.9	715.1	2359.4
FALSE	High	Master Protein	P12265	Beta-glucuronidase OS=Mus musculus OX=10090 GN=Gusb PE=1 SV=2	0	44.423	23	15	28	15	15	648	74.1	6.7	70	15	0	1702.1	1508.7	2415.1	1543.3	2447	1215.3	920.2	923.9	1133.5	2121.7	1672.4	3584	3445	2902.3	1318.6	1738	3011.3	1175	1453.7	786.1	1079.3	503.1	475.6	355.3	369.8	477.4	130.9	168.9	206.5	677.8	806.4	3584
FALSE	High	Master Protein	Q9DCT8	Cysteine-rich protein 2 OS=Mus musculus OX=10090 GN=Crip2 PE=1 SV=1	0	44.368	44	8	19	8	8	208	22.7	8.63	63.51	8	0	2223.2	1980.4	1335.5	3311.2	1351.9	562.3	969.4	646	803.6	2910.9	1763.2	4105.1	5257.7	3377.4	3837.1	1091.2	3778	1804.7	1876.5	1111.9	1409.7	660.4	263	762.3	204.3	220.9	137.9	118.1	146.4	929.9	850.2	4105.1
FALSE	High	Master Protein	P14430	H-2 class I histocompatibility antigen, Q8 alpha chain OS=Mus musculus OX=10090 GN=H2-Q8 PE=3 SV=1	0	44.321	26	8	24	1	3	326	37.4	5.94	72.11	8	1	198.2	241.1	315.3	305.4	330.2	534.6	919.5	606.1	615.3	395	335.3	277.5	312.6	306.1	375.9	454.7	386.2	413.5	376	521.8	125.7	80.4	62.1	70.3	49.9	210	130.8	110.8	112.1	126.2	161.7	277.5
FALSE	High	Master Protein	P61164	Alpha-centractin OS=Mus musculus OX=10090 GN=Actr1a PE=1 SV=1	0	44.286	33	12	25	5	5	376	42.6	6.64	64.21	12	7	1815.7	1698.8	1761.6	1710.1	2308	1109.4	1152.9	1058.5	1141.1	1701.6	1550.4	2080.1	1796.5	2062.2	1995.7	779.6	1806.8	875.2	1395.7	1743.2	1151.3	566.5	346.9	393.7	348.8	435.8	164	193.5	207.9	543.6	747.6	2080.1
FALSE	High	Master Protein	P98064	Mannan-binding lectin serine protease 1 OS=Mus musculus OX=10090 GN=Masp1 PE=1 SV=2	0	44.246	18	12	21	12	12	704	79.9	5.55	52.4	12	0	199	290.3	304.7	485.2	386.4	1270	2351.5	2555.7	1582.4	1096.6	736.8	289.6	413.5	331.5	1467.3	1796.4	537.6	2078.6	2226.7	1490.9	126.2	96.8	60	111.7	58.4	498.9	334.5	467.2	288.3	350.3	355.3	289.6
FALSE	High	Master Protein	P62748	Hippocalcin-like protein 1 OS=Mus musculus OX=10090 GN=Hpcal1 PE=1 SV=2	0	44.166	67	12	21	5	12	193	22.3	5.5	59.49	12	0	806.8	854.9	889.2	951.3	956.2	757.6	640.4	507.1	692.1	1669.1	946.7	2053.2	1893.3	1849.1	1503.8	1156.9	2398.8	909.7	1099.4	1424.9	511.6	285.1	175.1	219	144.5	297.6	91.1	92.7	126.1	533.2	456.5	2053.2
FALSE	High	Master Protein	Q9D1Q6	Endoplasmic reticulum resident protein 44 OS=Mus musculus OX=10090 GN=Erp44 PE=1 SV=1	0	43.976	29	11	20	10	10	406	46.8	5.27	57.44	11	0	1475.5	1287.9	1386.8	558.2	956.8	653.2	652.4	631.3	642.2	1412.1	1052.1	2139.7	1763.9	1955.2	640.6	835	1855.5	760.6	986.1	1036.6	935.6	429.5	273.1	128.5	144.6	256.6	92.8	115.4	117	451.1	507.3	2139.7
FALSE	High	Master Protein	Q8BY87	Ubiquitin carboxyl-terminal hydrolase 47 OS=Mus musculus OX=10090 GN=Usp47 PE=1 SV=2	0	43.947	10	14	17	14	14	1376	157.4	5.11	39.11	14	0	706.7	692.4	486.5	539.9	493	287.1	234.8	193.6	318.4	758.8	498.4	915.6	772.7	758.4	870.7	670.1	766.7	732.2	667.4	731.3	448.1	230.9	95.8	124.3	74.5	112.8	33.4	35.4	58	242.4	240.3	915.6
FALSE	High	Master Protein	O55131	Septin-7 OS=Mus musculus OX=10090 GN=Septin7 PE=1 SV=1	0	43.942	29	13	19	12	12	436	50.5	8.57	50.11	13	1	1563	1116.7	1068.9	1863.9	1611.9	893.8	761.4	757.1	768.4	2294.8	1193.5	3115.6	2122.3	2436.9	5033.7	1147.5	2559.8	1442	1781.5	1717.8	991.1	372.4	210.5	429.1	243.6	351.1	108.3	138.4	140	733.1	575.5	3115.6
FALSE	High	Master Protein	O88968	Transcobalamin-2 OS=Mus musculus OX=10090 GN=Tcn2 PE=1 SV=1	0	43.872	23	11	24	11	11	430	47.6	6.33	71.62	11	0	2808.9	3600.6	3198.1	3425.4	3657.9	6123.2	5068	4374	4906	3488.8	3961.9	1973.6	3165.8	2814.9	2877.1	4740.2	2845.1	4161.6	4262.5	4103.6	1781.1	1200.7	629.8	788.6	552.8	2405.4	720.9	799.6	893.8	1114.5	1910.4	1973.6
FALSE	High	Master Protein	P63087	Serine/threonine-protein phosphatase PP1-gamma catalytic subunit OS=Mus musculus OX=10090 GN=Ppp1cc PE=1 SV=1	0	43.869	34	10	18	2	2	323	37	6.54	67.42	10	0	271.7	183.5	201.6	281.5	162.1	116.6	98.4	87	106.5	67.9	206.6	107.2	71.3	90.6	34.1	43.1	95.9	39.6	60.1	53.5	172.3	61.2	39.7	64.8	24.5	45.8	14	15.9	19.4	21.7	99.6	107.2
FALSE	High	Master Protein	Q9R1P0	Proteasome subunit alpha type-4 OS=Mus musculus OX=10090 GN=Psma4 PE=1 SV=1	0	43.864	35	9	28	9	9	261	29.5	7.72	88	9	0	3542.7	3467.4	2965.6	2769.5	3347.6	2160.5	2078.8	1886.1	2056.1	4275.1	3268.2	5423.7	3942.1	3943.2	3269	2375.9	4561.2	2409.4	2729.2	4686.9	2246.4	1156.3	584	637.6	505.9	848.7	295.7	344.8	374.6	1365.7	1575.9	5423.7
FALSE	High	Master Protein	P62137	Serine/threonine-protein phosphatase PP1-alpha catalytic subunit OS=Mus musculus OX=10090 GN=Ppp1ca PE=1 SV=1	0	43.85	34	10	19	2	2	330	37.5	6.33	70.79	10	9	1341.8	1140.7	1183.7	1199.3	1040.2	709.5	752.9	701.8	714.7	1153.8	1163.2	1330.4	1341.6	1216.4	1239.1	654	1235.8	731.4	805.1	979.7	850.8	380.4	233.1	276.1	157.2	278.7	107.1	128.3	130.2	368.6	560.9	1330.4
FALSE	High	Master Protein	O09061	Proteasome subunit beta type-1 OS=Mus musculus OX=10090 GN=Psmb1 PE=1 SV=1	0	43.804	43	9	20	9	9	240	26.4	7.81	66.79	9	0	2244.5	2275.7	2131.2	2727.8	2059.9	2207.1	1854.5	1652.5	1790.5	1454.4	2133.2	1612.2	1328	1468.7	1853.1	957.7	1466.2	1090.6	1224.5	1529.6	1423.2	758.9	419.7	628	311.3	867	263.8	302.1	326.2	464.6	1028.6	1612.2
FALSE	High	Master Protein	Q99L47	Hsc70-interacting protein OS=Mus musculus OX=10090 GN=St13 PE=1 SV=1	0	43.796	27	11	25	11	11	371	41.6	5.26	76.38	11	0	5021.7	3469.5	3369.8	4644.3	2928	1996.5	1671.7	1632.9	1629.1	1902.3	3728.6	2736	2478.1	2210.8	1675.9	867.9	2323.9	1107.8	1118.9	1435.6	3184.2	1157	663.6	1069.2	442.5	784.3	237.8	298.5	296.8	607.7	1797.9	2736
FALSE	High	Master Protein	P22777	Plasminogen activator inhibitor 1 OS=Mus musculus OX=10090 GN=Serpine1 PE=1 SV=1	0	43.77	27	12	23	12	12	402	45.1	6.64	63.77	12	0	2276.4	2321	1700.6	1706.6	1835.6	1636.6	3847.5	3095	2565.5	2564.1	2257.8	1267.4	1753.3	1639.3	1514.1	2630.7	1761.7	3612.9	4484.1	5301.2	1443.4	774	334.9	392.9	277.4	642.9	547.3	565.8	467.4	819.1	1088.7	1267.4
FALSE	High	Master Protein	O70250	Phosphoglycerate mutase 2 OS=Mus musculus OX=10090 GN=Pgam2 PE=1 SV=3	0	43.748	27	7	21	3	3	253	28.8	8.5	71.42	7	0	435.9	1575.5	1366	168.5	230.3	317.4	883.7	379.1	1197.7	689	591.1	376.3	428	624.5	142.6	249.6	310.5	196.4	1450.9	1192.1	276.4	525.4	269	38.8	34.8	124.7	125.7	69.3	218.2	220.1	285	376.3
FALSE	High	Master Protein	P62192	26S proteasome regulatory subunit 4 OS=Mus musculus OX=10090 GN=Psmc1 PE=1 SV=1	0	43.715	31	14	22	13	13	440	49.2	6.21	62.34	14	1	1825.3	1657.7	1482.8	1749.2	1500.7	1055.4	1076.3	875.2	1028.1	2874.3	1641.3	3385.3	2554.2	2853.3	3382.1	1327	2832.4	1693.6	3089.8	2987.9	1157.4	552.8	292	402.7	226.8	414.6	153.1	160	187.3	918.2	791.4	3385.3
FALSE	High	Master Protein	P31001	Desmin OS=Mus musculus OX=10090 GN=Des PE=1 SV=3	0	43.701	20	11	23	7	7	469	53.5	5.27	64.52	11	0	125.2	122.9	186.4	383.1	704.1	550.9	1459.4	1219.9	973.7	706.5	521	259.1	270.8	325.7	843.1	789.1	490.9	1172.4	2455.2	1768.8	79.4	41	36.7	88.2	106.4	216.4	207.6	223	177.4	225.7	251.2	259.1
FALSE	High	Master Protein	Q64442	Sorbitol dehydrogenase OS=Mus musculus OX=10090 GN=Sord PE=1 SV=3	0	43.639	39	13	22	13	13	357	38.2	7.02	58.92	13	0	2923	3220.3	3328.1	1613.2	2217.4	1754.7	1981.1	1681	1971.6	2996.7	2740.8	3877.9	3113.9	2799.4	2314.1	2497.8	3063.6	2433.6	4150	2976.6	1853.4	1073.9	655.4	371.4	335.1	689.3	281.8	307.3	359.2	957.3	1321.6	3877.9
FALSE	High	Master Protein	P33587	Vitamin K-dependent protein C OS=Mus musculus OX=10090 GN=Proc PE=1 SV=2	0	43.579	25	11	23	11	11	460	51.8	6.35	65.55	11	0	1134.7	1716.8	1525.4	1593.3	1521.3	4080.6	4083.7	5932.4	4662.8	2608.8	2919.4	892.6	1452.1	1139.7	2344.5	2727	1690.7	4936.9	3852.3	5915.5	719.5	572.5	300.4	366.8	229.9	1603	580.9	1084.5	849.5	833.4	1407.7	892.6
FALSE	High	Master Protein	P17426	AP-2 complex subunit alpha-1 OS=Mus musculus OX=10090 GN=Ap2a1 PE=1 SV=1	0	43.567	14	15	21	6	6	977	107.6	7.03	53.66	15	0	453.4	421.9	343.3	618.5	436.7	475.8	463.3	417.9	432.5		378.3										287.5	140.7	67.6	142.4	66	186.9	65.9	76.4	78.8		182.4
FALSE	High	Master Protein	P41317	Mannose-binding protein C OS=Mus musculus OX=10090 GN=Mbl2 PE=1 SV=2	0	43.53	34	9	23	7	7	244	25.9	5.06	69.4	9	0	379.4	588	528.6	834.4	720.6	1931.1	3470	3412.9	2603.4	1829.7	1153.9	406.2	630.1	600	1675.4	2991.3	952	4922.3	2659.3	2632	240.6	196.1	104.1	192.1	108.9	758.6	493.6	623.9	474.3	584.5	556.4	406.2
FALSE	High	Master Protein	P35951	Low-density lipoprotein receptor OS=Mus musculus OX=10090 GN=Ldlr PE=1 SV=2	0	43.518	15	11	18	10	11	862	94.9	5.02	54.34	11	0	793.1	774.6	1107.5	657.2	1089.8	774.9	980	1078.7	966.6	678.3	857.3	570.8	833.1	766.6	244.1	481	708.4	876.1	1044.1	845.5	502.9	258.3	218.1	151.3	164.7	304.4	139.4	197.2	176.1	216.7	413.4	570.8
FALSE	High	Master Protein	Q9DBS5	Kinesin light chain 4 OS=Mus musculus OX=10090 GN=Klc4 PE=1 SV=1	0	43.494	19	12	20	7	7	619	68.6	6.09	52.62	12	5	1470	1319.4	1167.4	1592.8	1177.8	675.6	591.2	769.1	627.4	1267.2	1152.9	1645.9	1477.7	1320.9	1734.8	587.6	1305.8	895	683.5	724.5	932.1	440	229.9	366.7	178	265.4	84.1	140.6	114.3	404.8	555.9	1645.9
FALSE	High	Master Protein	Q9JHW2	Omega-amidase NIT2 OS=Mus musculus OX=10090 GN=Nit2 PE=1 SV=1	0	43.455	45	10	21	10	10	276	30.5	6.9	68.83	10	0	1257.4	1506	1332	1491.2	1027.6	612	620.8	531.2	622.4	1433.1	1035.7	2294.5	2108.6	2325.1	1239.1	590.5	1709.6	702.9	694	531.3	797.3	502.2	262.3	343.3	155.3	240.4	88.3	97.1	113.4	457.8	499.4	2294.5
FALSE	High	Master Protein	Q7TQI3	Ubiquitin thioesterase OTUB1 OS=Mus musculus OX=10090 GN=Otub1 PE=1 SV=2	0	43.436	35	8	19	8	8	271	31.3	4.94	67.13	8	0	2347	1994.7	1446.7	3023.6	1243.3	818.4	773.3	548.1	600.5	2020.9	1575.1	2793.2	2406.3	1873.6	2700.9	621.2	2557.7	807.2	1008.5	1018.5	1488.2	665.2	284.9	696.1	187.9	321.5	110	100.2	109.4	645.6	759.5	2793.2
FALSE	High	Master Protein	P62334	26S proteasome regulatory subunit 10B OS=Mus musculus OX=10090 GN=Psmc6 PE=1 SV=1	0	43.421	28	10	18	10	10	389	44.1	7.49	52.9	10	0	1630.5	1368.6	1260.9	1947.7	1569.6	1091.1	1164.9	792.6	871.6	1096.9	1417.7	1287.7	943.6	973.1	1524.8	529.2	1113	638.3	727.5	1187.6	1033.9	456.4	248.3	448.4	237.2	428.6	165.7	144.9	158.8	350.4	683.6	1287.7
FALSE	High	Master Protein	P17918	Proliferating cell nuclear antigen OS=Mus musculus OX=10090 GN=Pcna PE=1 SV=2	0	43.331	37	10	18	10	10	261	28.8	4.77	53.47	10	0	1273.3	1023.5	832.8	644.6	1338.6	772.3	653.1	604.5	562.6	1152.6	1023.5	1571.2	1088.9	932.3	609.3	592.7	1376.3	642.6	1023.9	1310.9	807.4	341.3	164	148.4	202.3	303.4	92.9	110.5	102.5	368.2	493.5	1571.2
FALSE	High	Master Protein	G5E8Q8	Adhesion G protein-coupled receptor F5 OS=Mus musculus OX=10090 GN=Adgrf5 PE=1 SV=1	0	43.273	10	13	23	13	13	1348	149.3	7.02	63.74	13	0	1911.3	2174.1	2312.5	1169.8	2727.5	1570.9	973.7	874.1	1115.3	1525.4	1708.2	1842.7	2413.8	2425.5	1028.7	1338.7	2315.9	1203.4	2483.9	899.7	1211.9	725	455.4	269.3	412.2	617.1	138.5	159.8	203.2	487.3	823.7	1842.7
FALSE	High	Master Protein	Q9Z0U1	Tight junction protein ZO-2 OS=Mus musculus OX=10090 GN=Tjp2 PE=1 SV=2	0	43.258	11	14	20	12	13	1167	131.2	6.79	46.56	14	1	1138.3	1090.3	967.9	1010.3	1151.4	865	906.2	756.5	720.7	1842.8	975.1	2458.5	2071.2	2256.5	2534.9	1232.1	1961.6	1291.3	2068.7	1443.5	721.8	363.6	190.6	232.6	174	339.8	128.9	138.3	131.3	588.7	470.2	2458.5
FALSE	High	Master Protein	Q9JHJ0	Tropomodulin-3 OS=Mus musculus OX=10090 GN=Tmod3 PE=1 SV=1	0	43.22	35	12	20	12	12	352	39.5	5.14	62.84	12	0	1740.6	1445.7	1271	1410	1357.2	647.4	681.2	599.5	555.5	2381.6	1394.5	3522.1	2792	2606.7	1804	1168.6	3095	1404.1	1400.6	1043.4	1103.7	482.1	250.3	324.6	205.1	254.3	96.9	109.6	101.2	760.8	672.4	3522.1
FALSE	High	Master Protein	P35235	Tyrosine-protein phosphatase non-receptor type 11 OS=Mus musculus OX=10090 GN=Ptpn11 PE=1 SV=3	0	43.207	24	16	22	16	16	593	68	7.3	57.15	16	0	2024.2	1859.8	1641.7	3327.7	1500.7	1109.4	1026.4	905.3	886.5	2254.5	1586.9	2702.8	3330.5	2529.2	3341.5	1047.5	2201.3	1472.2	1504.7	1316.3	1283.5	620.2	323.3	766.1	226.8	435.8	146	165.5	161.5	720.2	765.2	2702.8
FALSE	High	Master Protein	Q920E5	Farnesyl pyrophosphate synthase OS=Mus musculus OX=10090 GN=Fdps PE=1 SV=1	0	43.19	29	11	22	11	11	353	40.6	5.66	63.6	11	0	1162.5	1441.2	1244.1	1987.7	1618.5	1064.6	1236.6	855	817.3	1352.9	1019.5	1378.2	1361.4	2058.9	1543.5	894.9	1269	908.8	1227.3	1116.4	737.1	480.6	245	457.6	244.6	418.2	175.9	156.3	148.9	432.2	491.6	1378.2
FALSE	High	Master Protein	P52196	Thiosulfate sulfurtransferase OS=Mus musculus OX=10090 GN=Tst PE=1 SV=3	0	43.157	33	11	22	11	11	297	33.4	7.85	70.36	11	0	6306.3	4895.4	5568.6	1660.6	6249.8	1312.3	2532.2	927.2	1145	2048.5	3180.1	3804.8	3436.2	2916.1	735.1	1738.7	2675.9	784.8	803	537.9	3998.7	1632.5	1096.6	382.3	944.5	515.5	360.2	169.5	208.6	654.4	1533.4	3804.8
FALSE	High	Master Protein	O89110	Caspase-8 OS=Mus musculus OX=10090 GN=Casp8 PE=1 SV=1	0	43.152	24	12	16	12	12	480	55.3	5.25	47.11	12	0	1201.7	1007	871.9	1808.7	1007.8	668	582.1	536.1	537.4	1291.3	1098.9	2053.3	1157.1	947	1266.7	413.1	1525.3	437.6	561.2	737.4	762	335.8	171.7	416.4	152.3	262.4	82.8	98	97.9	412.5	529.9	2053.3
FALSE	High	Master Protein	P62141	Serine/threonine-protein phosphatase PP1-beta catalytic subunit OS=Mus musculus OX=10090 GN=Ppp1cb PE=1 SV=3	0	43.131	35	10	16	3	3	327	37.2	6.19	59.92	10	0	65.9	57.3	124.4	82.1	164.8	82.2	87.9	213.3	163.6	88.9	79	126.3	124.6	119.2	175.3	49.6	102.9	72.4	67.1	56.2	41.8	19.1	24.5	18.9	24.9	32.3	12.5	39	29.8	28.4	38.1	126.3
FALSE	High	Master Protein	Q9EPK7	Exportin-7 OS=Mus musculus OX=10090 GN=Xpo7 PE=1 SV=3	0	43.114	12	14	20	14	14	1087	123.7	6.38	52.98	14	0	619	602.1	590.1	595.1	520.1	430.2	333.9	388.9	501.7	1544.2	552.3	1875.4	1465.4	1544.6	1833.9	1253.3	1562.4	1032.9	1173.4	1260.6	392.5	200.8	116.2	137	78.6	169	47.5	71.1	91.4	493.3	266.3	1875.4
FALSE	High	Master Protein	Q61655	ATP-dependent RNA helicase DDX19A OS=Mus musculus OX=10090 GN=Ddx19a PE=1 SV=2	0	43.068	24	13	22	12	13	478	53.9	6.67	60.84	13	0	1259.8	1079.2	984.6	1590.2	1001.2	709	751.5	573.3	545.6	1955.2	1020.8	3093.7	2628.2	2454.9	2684	1033.6	2225.7	1264.6	1313.2	1011.5	798.8	359.9	193.9	366.1	151.3	278.5	106.9	104.8	99.4	624.6	492.2	3093.7
FALSE	High	Master Protein	Q9WTX6	Cullin-1 OS=Mus musculus OX=10090 GN=Cul1 PE=1 SV=1	0	43.05	15	14	22	14	14	776	89.6	8	57.78	14	0	1751.3	1554.5	1355.3	1789.2	1358.5	1165.1	1043.3	1059	1087.9	2635.1	1484.1	2938.1	2091	1975.7	2837.9	1478.8	2414.6	1677.2	1838.8	2543.6	1110.5	518.4	266.9	411.9	205.3	457.7	148.4	193.6	198.2	841.8	715.6	2938.1
FALSE	High	Master Protein	Q9WUM3	Coronin-1B OS=Mus musculus OX=10090 GN=Coro1b PE=1 SV=1	0	43.039	27	14	24	14	14	484	53.9	5.78	59.05	14	0	2161.7	1910.8	1539.1	2594.1	2129.4	1116.3	880.9	780.6	849.7	2130.2	1713	3234.9	1999.4	1751.2	2804.7	1129.2	2970.6	956.2	1309.7	1415.2	1370.7	637.2	303.1	597.2	321.8	438.5	125.3	142.7	154.8	680.5	826	3234.9
FALSE	High	Master Protein	Q9JMC3	DnaJ homolog subfamily A member 4 OS=Mus musculus OX=10090 GN=Dnaja4 PE=1 SV=1	0	42.972	29	12	18	12	12	397	44.9	7.58	56.64	12	0	2015.5	1758.4	1965.2	814	1647.6	604.3	540.6	421.8	561	1710.7	1274.8	2370.2	2604.4	3747.2	1960.6	1068.6	1925.3	1289.6	854	693	1278	586.4	387	187.4	249	237.4	76.9	77.1	102.2	546.5	614.7	2370.2
FALSE	High	Master Protein	P10648	Glutathione S-transferase A2 OS=Mus musculus OX=10090 GN=Gsta2 PE=1 SV=3	0	42.837	40	9	41	1	7	222	25.5	8.81	137.66	9	0	2156.2	2239.7	1633.1	443.5	796	535.3	410.6	364.9	496.2	733.1	1704.1	1687.5	949.3	526.6	502.2	167.2	1107	289.4	345.3	208.1	1367.2	746.9	321.6	102.1	120.3	210.3	58.4	66.7	90.4	234.2	821.7	1687.5
FALSE	High	Master Protein	P32067	Lupus La protein homolog OS=Mus musculus OX=10090 GN=Ssb PE=1 SV=1	0	42.808	28	12	18	12	12	415	47.7	9.77	53.01	12	0	998.9	585.9	561.6	502.1	616.7	274.9	329.7	280.6	282.7	963.5	493.2	1520	963.4	1156	607.4	619.7	1131.1	400.6	599.7	622.5	633.4	195.4	110.6	115.6	93.2	108	46.9	51.3	51.5	307.8	237.8	1520
FALSE	High	Master Protein	P21956	Lactadherin OS=Mus musculus OX=10090 GN=Mfge8 PE=1 SV=3	0	42.78	30	11	18	11	11	463	51.2	6.52	50.9	11	0	1024	1086.4	1326.4	989.5	1577.5	1713.2	2135.7	1753.7	2199.9	1111.6	1483.6	628	1066.9	1205	1205	2034.3	934.4	2114	1166.5	1478	649.3	362.3	261.2	227.8	238.4	673	303.8	320.6	400.8	355.1	715.4	628
FALSE	High	Master Protein	P70265	6-phosphofructo-2-kinase/fructose-2,6-bisphosphatase 2 OS=Mus musculus OX=10090 GN=Pfkfb2 PE=1 SV=2	0	42.777	25	14	22	14	14	519	59.9	8.12	52.07	14	0	1322.4	1040.3	1015.6	994.3	952.9	614.5	374	829.3	710.3	1063.4	1096.2	1364.4	1192.8	1092.3	1252.7	629.2	993.7	559.9	1088.2	696.6	838.5	346.9	200	228.9	144	241.4	53.2	151.6	129.4	339.7	528.6	1364.4
FALSE	High	Master Protein	P63005	Platelet-activating factor acetylhydrolase IB subunit alpha OS=Mus musculus OX=10090 GN=Pafah1b1 PE=1 SV=2	0	42.759	28	12	24	11	11	410	46.6	7.37	64.65	12	1	2306	2066.7	1635.1	3596.6	1596	1145.3	1155	886.7	1118.1	1911.1	1811.1	2244.1	1979.2	1720.9	3675.8	889.8	2135.5	1256	1058.8	1339	1462.2	689.2	322	828	241.2	449.9	164.3	162.1	203.7	610.5	873.3	2244.1
FALSE	High	Master Protein	Q8BKG3	Inactive tyrosine-protein kinase 7 OS=Mus musculus OX=10090 GN=Ptk7 PE=1 SV=1	0	42.725	12	11	17	11	11	1062	117.5	6.84	46.32	11	0	510.8	629.7	736.8	1019.5	1166.6	1395.8	1928.3	2011.4	1526.5	807.6	996.5	459.1	734.9	655.6	756.1	966.4	634.5	1811.6	1119.6	952.7	323.9	210	145.1	234.7	176.3	548.3	274.3	367.7	278.1	258	480.5	459.1
FALSE	High	Master Protein	B2RQC6	CAD protein OS=Mus musculus OX=10090 GN=Cad PE=1 SV=1	0	42.71	6	15	21	12	15	2225	243.1	6.43	53.95	15	0	910.3	747.6	718.5	599.4	813.2	525.7	707.2	461.7	508.3	2156.8	767.3	2847.7	1959.4	2063	1802.1	1099.3	2242.3	1307.7	1835.3	2673.9	577.2	249.3	141.5	138	122.9	206.5	100.6	84.4	92.6	689	370	2847.7
FALSE	High	Master Protein	Q9Z1N5	Spliceosome RNA helicase Ddx39b OS=Mus musculus OX=10090 GN=Ddx39b PE=1 SV=1	0	42.553	25	11	20	5	11	428	49	5.67	60.26	11	0	4482.8	3794.9	4499.6	2242.2	2540.9	1567.8	1526.9	1390	1493	2493	2482.6	3774	2372	2944.7	1771.7	943.8	3000.1	877.8	1604.7	1883.3	2842.5	1265.5	886.1	516.2	384	615.9	217.2	254.1	272	796.4	1197.1	3774
FALSE	High	Master Protein	Q62393	Tumor protein D52 OS=Mus musculus OX=10090 GN=Tpd52 PE=1 SV=2	0	42.245	28	6	16	6	6	224	24.3	4.72	63.01	6	0	3278.7	3551.4	2742.6	2291.7	1400.8	701.3	876.6	838.6	707.5	1503.5	1868.1	1944.6	3132.8	2825.5	885.2	600	1223.9	733.9	665.3	765.5	2079	1184.3	540.1	527.6	211.7	275.5	124.7	153.3	128.9	480.3	900.8	1944.6
FALSE	High	Master Protein	Q9CS42	Ribose-phosphate pyrophosphokinase 2 OS=Mus musculus OX=10090 GN=Prps2 PE=1 SV=4	0	42.176	28	10	23	5	5	318	34.8	6.61	77	10	5	5426.4	4735.3	4197.5	3703	3066.3	2052.5	1885.5	1553	2100.6	2375.9	3964.8	3858.4	3080.8	2663.1	2137.4	1140.9	2671.5	1197.4	1267.8	1157	3440.8	1579.1	826.6	852.5	463.4	806.3	268.2	283.9	382.7	759	1911.8	3858.4
FALSE	High	Master Protein	P46638	Ras-related protein Rab-11B OS=Mus musculus OX=10090 GN=Rab11b PE=1 SV=3	0	42.171	53	11	20	2	11	218	24.5	5.94	59.22	11	0	2961.8	2408	2509.6	3693	1931.5	1537.6	2154	2363.1	2115.4	2702.7	2571.8	2781.6	2549.4	2136.5	2263.6	1075.9	2040.1	1684.1	2230.2	3041.4	1878	803	494.2	850.2	291.9	604	306.4	432	385.4	863.4	1240.1	2781.6
FALSE	High	Master Protein	Q60994	Adiponectin OS=Mus musculus OX=10090 GN=Adipoq PE=1 SV=2	0	41.917	25	5	21	5	5	247	26.8	5.57	62.72	5	0	2468.9	3204.7	2746.7	1585.9	2363.6	1331.1	1232.4	1500.5	1228.4	1053	1530.3	731.1	1644.1	1627.9	834.2	1029.9	1853.7	798.6	337.6	277	1565.5	1068.7	540.9	365.1	357.2	522.9	175.3	274.3	223.8	336.4	737.9	731.1
FALSE	High	Master Protein	Q64449	C-type mannose receptor 2 OS=Mus musculus OX=10090 GN=Mrc2 PE=1 SV=3	0	41.755	10	14	18	14	14	1479	167	5.99	49.93	14	0	1300.5	1548.2	1495	2358.6	3006.1	2585.6	1595.8	2106	1827.8	2057.6	1773.4	1712.9	2630.9	1883.4	1690.4	2170.1	1483.1	4088.4	2701.2	2153.7	824.6	516.3	294.4	543	454.3	1015.7	227	385	333	657.3	855.1	1712.9
FALSE	High	Master Protein	Q8VCR7	Protein ABHD14B OS=Mus musculus OX=10090 GN=Abhd14b PE=1 SV=1	0	41.704	46	8	22	8	8	210	22.4	6.27	73.96	8	0	2830.1	2964.8	2115	2162.7	1463	704.4	591.2	554.7	711.9	1078.4	1813.4	2012.5	1667.9	1167.4	938	432.8	1372.2	484.1	457.8	360.9	1794.5	988.7	416.5	497.9	221.1	276.7	84.1	101.4	129.7	344.5	874.4	2012.5
FALSE	High	Master Protein	Q9Z2I9	Succinate--CoA ligase [ADP-forming] subunit beta, mitochondrial OS=Mus musculus OX=10090 GN=Sucla2 PE=1 SV=2	0	41.704	24	12	22	12	12	463	50.1	7.01	66.91	12	0	2685.3	2100.3	2168.8	997.7	1272.5	639.2	459.8	388.4	477	2326.8	1365	4033.6	3280.8	3143.9	1165.3	951.1	3074.8	881.3	804.4	1092.4	1702.7	700.4	427.1	229.7	192.3	251.1	65.4	71	86.9	743.3	658.2	4033.6
FALSE	High	Master Protein	P24547	Inosine-5'-monophosphate dehydrogenase 2 OS=Mus musculus OX=10090 GN=Impdh2 PE=1 SV=2	0	41.597	21	11	22	9	11	514	55.8	7.28	72.25	11	0	2682	2138.7	1979.9	1744	2034.7	1030.5	1095.3	1163	1178.5	1240.6	2063.3	1831.5	1234.2	1239.3	1393.4	554.7	1411	752	803	749	1700.6	713.2	389.9	401.5	307.5	404.8	155.8	212.6	214.7	396.3	994.9	1831.5
FALSE	High	Master Protein	O70370	Cathepsin S OS=Mus musculus OX=10090 GN=Ctss PE=1 SV=2	0	41.596	28	9	25	9	9	340	38.4	6.96	82.89	9	0	2757.4	2715.3	4846.5	4365.4	4863.5	5410.5	2344.5	2082	2336.1	5319.1	3624.1	5443.7	7631.5	6660.9	3807.2	8640.9	5814.4	2852.2	2212	2844.6	1748.4	905.5	954.4	1005	735	2125.4	333.5	380.6	425.6	1699.2	1747.5	5443.7
FALSE	High	Master Protein	P00329	Alcohol dehydrogenase 1 OS=Mus musculus OX=10090 GN=Adh1 PE=1 SV=2	0	41.582	27	10	23	10	10	375	39.7	8.1	72.18	10	0	2300.6	2045.4	2125.7	10029.6	2389.4	855.1	1488.3	1188.7	1111.5	2093.9	2320	1796	1956.3	2080.2	7817.3	900.7	1646.6	1519.6	1533.4	1051.8	1458.8	682.1	418.6	2309	361.1	335.9	211.7	217.3	202.5	668.9	1118.7	1796
FALSE	High	Master Protein	P29391	Ferritin light chain 1 OS=Mus musculus OX=10090 GN=Ftl1 PE=1 SV=2	0	41.57	61	9	15	4	9	183	20.8	6	49.11	9	0	1257.7	1063.9	1171.5	669.8	1006.5	341.1	228.5	221.5	391.4	226.6	851.1	370.4	241.7	424.5	111.3	135.8	474.1	113.7	116	110.6	797.5	354.8	230.7	154.2	152.1	134	32.5	40.5	71.3	72.4	410.4	370.4
FALSE	High	Master Protein	Q60668	Heterogeneous nuclear ribonucleoprotein D0 OS=Mus musculus OX=10090 GN=Hnrnpd PE=1 SV=2	0	41.49	21	8	20	6	6	355	38.3	7.81	65.85	8	2	2955.3	1989	2402.4	1181.5	2392.7	1214.3	1428.5	1390	1154.9	1749.2	1795.1	2353.1	1983.6	2238.5	745.8	981	2215.8	775.3	1087.5	1281.2	1873.9	663.3	473.1	272	361.6	477	203.2	254.1	210.4	558.8	865.6	2353.1
FALSE	High	Master Protein	Q6P8X1	Sorting nexin-6 OS=Mus musculus OX=10090 GN=Snx6 PE=1 SV=2	0	41.33	28	13	24	12	13	406	46.6	6.16	61.53	13	0	3203.8	3116	2641.6	2553.2	2565.4	1263.9	1429.9	1188.1	1117	2220	2460.9	3287	2682.8	2295.7	2331	749.6	2591.9	1055.3	1112.6	1053.2	2031.5	1039.1	520.2	587.8	387.7	496.5	203.4	217.2	203.5	709.2	1186.6	3287
FALSE	High	Master Protein	P11672	Neutrophil gelatinase-associated lipocalin OS=Mus musculus OX=10090 GN=Lcn2 PE=1 SV=1	0	41.294	31	7	38	7	7	200	22.9	8.81	121.81	7	0	9106.7	7074.9	11066.5	7743.9	17524.6	10182.5	12382	7968.4	8250.4	2342.4	8818.5	2620.2	2892.8	2851.6	1991.5	2966.4	3240.1	1905.5	1604.7	1563.6	5774.4	2359.3	2179.3	1782.8	2648.4	4000	1761.3	1456.7	1503.1	748.3	4252.2	2620.2
FALSE	High	Master Protein	P61202	COP9 signalosome complex subunit 2 OS=Mus musculus OX=10090 GN=Cops2 PE=1 SV=1	0	41.291	27	12	22	12	12	443	51.6	5.53	66.77	12	0	1600.1	1657.7	1675.2	1296.6	1402.8	928.6	861.9	945.3	994	1173.9	1327.7	1625.9	1399.7	1391.1	1091.8	594.9	1396.3	660.7	811.4	766	1014.6	552.8	329.9	298.5	212	364.8	122.6	172.8	181.1	375	640.2	1625.9
FALSE	High	Master Protein	Q63918	Caveolae-associated protein 2 OS=Mus musculus OX=10090 GN=Cavin2 PE=1 SV=3	0	41.28	27	10	18	10	10	418	46.7	5.21	49.56	10	0	2404.9	1801	1285.2	2174.9	1879.9	1001.2	1137.5	747.2	1005	1156.3	1196.8	940.2	965.6	1006.6	1800.3	440.9	1086.5	710.7	858.2	1205.9	1524.9	600.6	253.1	500.7	284.1	393.3	161.8	136.6	183.1	369.4	577.1	940.2
FALSE	High	Master Protein	O09049	Regenerating islet-derived protein 3-gamma OS=Mus musculus OX=10090 GN=Reg3g PE=1 SV=1	0	41.265	40	5	19	5	5	174	19.3	8.35	67.64	5	0	1506.9	1371	1553.9	622.9	1453.1	1018	654.5	654.2	784.9	1248.7	949	1149	1795.6	2954.5	607.9	981.8	1990.8	653.8	388.6	445.9	955.5	457.2	306	143.4	219.6	399.9	93.1	119.6	143	398.9	457.6	1149
FALSE	High	Master Protein	Q02257	Junction plakoglobin OS=Mus musculus OX=10090 GN=Jup PE=1 SV=3	0	41.262	19	14	18	12	12	745	81.7	6.14	45.15	14	2	1450.3	2215.8	4694.6	2579.3	3446.2	2670.4	5396.3	9419.7	4307.7	1591.8	2375	798.3	1058.9	2965.1	2218.3	2724.1	915.5	2652.4	2007.9	954.8	919.6	738.9	924.5	593.8	520.8	1049	767.6	1722	784.8	508.5	1145.2	798.3
FALSE	High	Master Protein	Q61087	Laminin subunit beta-3 OS=Mus musculus OX=10090 GN=Lamb3 PE=1 SV=2	0	41.173	10	13	21	13	13	1168	128.8	7.47	50.88	13	0	464.6	583.3	920.6	1116.3	849.6	1905.9	1376.5	1462.2	1567.6	1131.9	983.8	428	534.5	674.3	2626	2991.3	676.7	3730	1638.9	951.8	294.6	194.5	181.3	257	128.4	748.7	195.8	267.3	285.6	361.6	474.4	428
FALSE	High	Master Protein	Q91V76	Ester hydrolase C11orf54 homolog OS=Mus musculus OX=10090 PE=1 SV=1	0	41.136	40	12	26	12	12	315	35	6.29	60.1	12	0	1271.3	1427.4	1662	1201	1037.6	494.6	375.4	373.1	429.2	1503.2	1220.9	2631.3	2438.4	2250	923	529.2	2069.4	534.1	714.3	551.7	806.1	476	327.3	276.5	156.8	194.3	53.4	68.2	78.2	480.2	588.7	2631.3
FALSE	High	Master Protein	P54822	Adenylosuccinate lyase OS=Mus musculus OX=10090 GN=Adsl PE=1 SV=2	0	41.059	18	10	22	10	10	484	54.8	7.27	56.74	10	0	1550.3	1490.4	1197.9	959.5	854.3	585.2	535.7	462.8	631.2	1905.4	1141.7	2839.6	1737.5	1735.6	2837.9	979.6	1929.9	1067.3	1079.8	1514.7	983	497	235.9	220.9	129.1	229.9	76.2	84.6	115	608.7	550.5	2839.6
FALSE	High	Master Protein	Q3THE2	Myosin regulatory light chain 12B OS=Mus musculus OX=10090 GN=Myl12b PE=1 SV=2	0	40.973	52	7	25	3	3	172	19.8	4.84	79.34	7	6	1676.4	1448.7	1307.6	3327.7	1714.5	964	1269.6	997.8	958.9	1537.9	1388.9	2030.6	1877	1952.8	2856.1	941.6	2036.5	1354.2	1065.8	944.4	1063	483.1	257.5	766.1	259.1	378.7	180.6	182.4	174.7	491.3	669.7	2030.6
FALSE	High	Master Protein	P12367	cAMP-dependent protein kinase type II-alpha regulatory subunit OS=Mus musculus OX=10090 GN=Prkar2a PE=1 SV=2	0	40.939	26	9	17	7	7	401	45.4	4.89	52.69	9	0	1458.6	1213.9	949.6	2158.4	1088.5	1101.7	1268.9	814	1210.9	1587.1	1123	1125.4	1283.1	1529.9	2252.9	843.1	1217.9	1043.2	1283.9	1834.1	924.9	404.8	187	496.9	164.5	432.8	180.5	148.8	220.6	507	541.5	1125.4
FALSE	High	Master Protein	Q91X83	S-adenosylmethionine synthase isoform type-1 OS=Mus musculus OX=10090 GN=Mat1a PE=1 SV=1	0	40.855	30	10	18	7	7	396	43.5	5.82	59.9	10	0	1161	1149.1	1006.5	642.4	645.2	544.3	499.1	441.4	530.2	759.7	901.5	1316.7	829.5	893.1	712.2	290.5	786.9	347.2	511.6	375.6	736.2	383.2	198.2	147.9	97.5	213.8	71	80.7	96.6	242.7	434.7	1316.7
FALSE	High	Master Protein	P61087	Ubiquitin-conjugating enzyme E2 K OS=Mus musculus OX=10090 GN=Ube2k PE=1 SV=3	0	40.832	49	8	19	8	8	200	22.4	5.44	58.37	8	0	2041.5	1618.7	1396.5	1454.7	1422.7	879.5	634.8	579.3	716.8	1504.8	1482.4	2759.9	2097.2	1593.6	1336.9	678.1	1736.6	759.8	799.5	641.7	1294.5	539.8	275	334.9	215	345.5	90.3	105.9	130.6	480.7	714.8	2759.9
FALSE	High	Master Protein	Q6PDN3	Myosin light chain kinase, smooth muscle OS=Mus musculus OX=10090 GN=Mylk PE=1 SV=3	0	40.782	6	13	17	12	12	1941	212.8	6.25	42.52	13	1	3254.1	1778.2	1693.5	2753.5	1739	830.4	937.8	944.2	830.5	851.1	1683.8	848.3	561	675.2	1842.8	322.6	866	662.4	921.1	681.4	2063.4	593	333.5	633.9	262.8	326.2	133.4	172.6	151.3	271.9	811.9	848.3
FALSE	High	Master Protein	P97467	Peptidyl-glycine alpha-amidating monooxygenase OS=Mus musculus OX=10090 GN=Pam PE=1 SV=2	0	40.777	13	14	20	14	14	979	108.9	6.55	49.67	14	0	955.9	1230.4	1369	993.4	1431.9	1348.7	622.2	710.6	867.2	2148.3	962.9	1525.6	2344.2	2815.7	1214.4	2765	2063.2	2120.9	1949.2	1979.4	606.1	410.3	269.6	228.7	216.4	529.8	88.5	129.9	158	686.3	464.3	1525.6
FALSE	High	Master Protein	Q8BML9	Glutamine--tRNA ligase OS=Mus musculus OX=10090 GN=Qars1 PE=1 SV=1	0	40.754	17	14	24	13	13	775	87.6	7.31	61.47	14	0	1911.4	1634.3	1736.2	1682.7	2092.3	899.4	977.9	771.3	943.5	1344.8	1433.5	1787.3	1268.1	1410.7	1592.2	685.4	1429.2	908.8	879.9	1174.4	1212	545	341.9	387.4	316.2	353.3	139.1	141	171.9	429.6	691.2	1787.3
FALSE	High	Master Protein	Q8K1B8	Fermitin family homolog 3 OS=Mus musculus OX=10090 GN=Fermt3 PE=1 SV=1	0	40.751	19	12	19	12	12	665	75.6	7.05	55.37	12	0	760.9	663.9	463.6	722.8	782.8	531.8	994.8	1007.6	716.8	1112.5	807.6	1362.4	794.8	947.8	796.8	738	1482.3	621.1	1660.6	1474.3	482.5	221.4	91.3	166.4	118.3	208.9	141.5	184.2	130.6	355.4	389.4	1362.4
FALSE	High	Master Protein	Q921M3	Splicing factor 3B subunit 3 OS=Mus musculus OX=10090 GN=Sf3b3 PE=1 SV=1	0	40.692	11	14	22	14	14	1217	135.5	5.26	47.43	14	0	1732.6	1141.3	1313.2	1152.8	1578.8	836.7	1110	926.1	1035.2	1273.7	1312.6	1952.8	1053.7	1610.7	828.1	615.3	1491.4	611.6	696.1	1049.3	1098.6	380.6	258.6	265.4	238.6	328.7	157.9	169.3	188.6	406.9	632.9	1952.8
FALSE	High	Master Protein	P12970	60S ribosomal protein L7a OS=Mus musculus OX=10090 GN=Rpl7a PE=1 SV=2	0	40.645	33	9	16	9	9	266	30	10.56	51.32	9	0	1210.4	1164.1	1293.4	1091.6	1557.7	657.3	696	694.7	767.3	1514.1	896.3	1849.1	1641.9	1842.6	1258.8	1182.5	1796.5	1298.2	960.3	818.1	767.5	388.2	254.7	251.3	235.4	258.2	99	127	139.8	483.7	432.2	1849.1
FALSE	High	Master Protein	Q91ZA3	Propionyl-CoA carboxylase alpha chain, mitochondrial OS=Mus musculus OX=10090 GN=Pcca PE=1 SV=2	0	40.627	18	12	17	12	12	724	79.9	7.25	44.81	12	0	1597.4	1467.3	1144.1	858.3	713.3	592.9	471	335.9	479.7	1654.7	875	2556.4	2045.2	1427	915.1	672.3	2042.9	571.1	684.9	745.8	1012.9	489.3	225.3	197.6	107.8	232.9	67	61.4	87.4	528.6	421.9	2556.4
FALSE	High	Master Protein	P14847	C-reactive protein OS=Mus musculus OX=10090 GN=Crp PE=1 SV=2	0	40.524	31	8	17	8	8	225	25.3	6.2	58.82	8	0	1293	1981.3	2004.8	2460.3	2184.9	4687.8	4039.5	4339.5	5669.5	2647.9	3199.2	851.3	1400.2	1236.8	3290	5200	1905.3	4195.2	4130.5	4122.2	819.9	660.7	394.8	566.4	330.2	1841.5	574.6	793.3	1032.9	845.9	1542.6	851.3
FALSE	High	Master Protein	Q91VR2	ATP synthase subunit gamma, mitochondrial OS=Mus musculus OX=10090 GN=Atp5f1c PE=1 SV=1	0	40.482	31	9	16	9	9	298	32.9	9.01	48.84	9	0	1161.4	777.9	968.4	354.4	752.4	316.9	248.2	244.5	348.5	416.3	542.1	585.3	677.6	667.8	243.2	238	649	261	330.6	148.9	736.4	259.4	190.7	81.6	113.7	124.5	35.3	44.7	63.5	133	261.4	585.3
FALSE	High	Master Protein	Q6NXH9	Keratin, type II cytoskeletal 73 OS=Mus musculus OX=10090 GN=Krt73 PE=1 SV=1	0	40.372	13	9	31	2	2	539	58.9	8.09	88.63	9	1	331	718.2	1171	843.1	650.5	674.8	1865.8	2286.5	1606.6	903.4	713.2	426.9	619.1	1772.4	1165.3	2605.9	696.7	2160.5	1309	393.3	209.9	239.5	230.6	194.1	98.3	265.1	265.4	418	292.7	288.6	343.9	426.9
FALSE	High	Master Protein	Q99JY0	Trifunctional enzyme subunit beta, mitochondrial OS=Mus musculus OX=10090 GN=Hadhb PE=1 SV=1	0	40.366	21	11	18	10	11	475	51.4	9.38	45.65	11	0	1337	957.2	956.2	543	958.1	443.2	369.1	303	465.5	271.4	683.3	445.4	392.8	337.2	162.7	187.6	409.5	135.2	126.5	93.4	847.8	319.2	188.3	125	144.8	174.1	52.5	55.4	84.8	86.7	329.5	445.4
FALSE	High	Master Protein	Q9Z2U1	Proteasome subunit alpha type-5 OS=Mus musculus OX=10090 GN=Psma5 PE=1 SV=1	0	40.338	27	6	18	6	6	241	26.4	4.79	56	6	0	1785.6	1780.9	1577.7	1226.2	1570.9	1342.1	1048.2	984.1	1030.8	950.7	1481.8	1069.1	939.6	911.9	783.2	423.4	919.3	547	573.1	890.4	1132.2	593.9	310.7	282.3	237.4	527.2	149.1	179.9	187.8	303.7	714.5	1069.1
FALSE	High	Master Protein	Q8BU30	Isoleucine--tRNA ligase, cytoplasmic OS=Mus musculus OX=10090 GN=Iars1 PE=1 SV=2	0	40.325	9	13	22	13	13	1262	144.2	6.55	60.38	13	0	2593.8	2323.1	2653.8	2209.2	2151.9	1339.5	814.8	774	1125.2	1767.7	1831.4	2849.3	1811	2598.6	2821.5	807.3	2102.3	835.6	828.9	842.8	1644.7	774.7	522.6	508.6	325.2	526.2	115.9	141.5	205	564.7	883.1	2849.3
FALSE	High	Master Protein	Q99MN9	Propionyl-CoA carboxylase beta chain, mitochondrial OS=Mus musculus OX=10090 GN=Pccb PE=1 SV=2	0	40.325	23	10	15	10	10	541	58.4	7.66	43.97	10	0	803.7	773.4	645.9	260.2	348.1	379.3	298.8	228.1	245.9	579.1	453.6	1084	782	539.6	322.6	214.6	860.8	238.6	218.1	247.5	509.6	257.9	127.2	59.9	52.6	149	42.5	41.7	44.8	185	218.7	1084
FALSE	High	Master Protein	O88685	26S proteasome regulatory subunit 6A OS=Mus musculus OX=10090 GN=Psmc3 PE=1 SV=2	0	40.321	33	13	20	13	13	442	49.5	5.19	53.31	13	0	2292.3	2018.1	1841.8	2673.5	2572	1543.2	1398.3	1384.5	1656	1628.1	1932	1990.5	1548.1	1685.8	2056	770.8	1793.3	951.9	1518.7	1773.1	1453.5	673	362.7	615.5	388.7	606.2	198.9	253.1	301.7	520.1	931.6	1990.5
FALSE	High	Master Protein	P24472	Glutathione S-transferase A4 OS=Mus musculus OX=10090 GN=Gsta4 PE=1 SV=3	0	40.284	36	9	30	7	7	222	25.5	7.39	90.59	9	0	6469.3	7602.6	6050.5	1326.6	3904.1	1346.9	790.2	671.2	1147.2	447.3	5308.9	880.7	756.9	738	255.3	279.6	600.3	256.7	308.2	219.7	4102.1	2535.3	1191.5	305.4	590	529.1	112.4	122.7	209	142.9	2559.9	880.7
FALSE	High	Master Protein	Q09200	Beta-1,4 N-acetylgalactosaminyltransferase 1 OS=Mus musculus OX=10090 GN=B4galnt1 PE=1 SV=1	0	40.218	23	12	21	12	12	533	59.2	8.59	52.81	12	0	1133.4	1256.2	1529	1146.3	2290.2	1375.7	939.9	848.4	995.1	1569.5	1109.1	1447.1	1518.2	1636	1134.9	1342.3	1593.8	1125	850.6	1188.3	718.7	418.9	301.1	263.9	346.1	540.4	133.7	155.1	181.3	501.4	534.8	1447.1
FALSE	High	Master Protein	Q9WVL0	Maleylacetoacetate isomerase OS=Mus musculus OX=10090 GN=Gstz1 PE=1 SV=1	0	40.186	47	9	21	9	9	216	24.3	7.85	68.88	9	0	1903.1	1921.3	1465.5	1075.1	935	712.5	662.9	529.5	611.5	483.3	1411.1	1029.3	645.1	406.6	262.8	213.1	622.8	171.4	226.4	217.6	1206.7	640.7	288.6	247.5	141.3	279.9	94.3	96.8	111.4	154.4	680.4	1029.3
FALSE	High	Master Protein	Q9QYR9	Acyl-coenzyme A thioesterase 2, mitochondrial OS=Mus musculus OX=10090 GN=Acot2 PE=1 SV=2	0	40.136	23	10	28	3	3	453	49.6	7.36	73.25	10	7	5384.3	4392.8	4113.2	3255.2	4383.1	2437.4	2523.1	3010.3	3038.7	2873.6	3770.5	4501.7	3455.1	3781.5	2851	1349.6	3970.5	1867.6	1597.7	1646.4	3414.1	1464.9	810	749.4	662.4	957.5	358.9	550.3	553.6	918	1818.1	4501.7
FALSE	High	Master Protein	P08752	Guanine nucleotide-binding protein G(i) subunit alpha-2 OS=Mus musculus OX=10090 GN=Gnai2 PE=1 SV=5	0	40.089	37	10	14	7	7	355	40.5	5.45	46.06	10	3	1369.7	1168.3	1256.3	1021.2	1111.7	643.8	722	731.4	848.6	1294.1	1091.1	1701.1	1280.4	1477.7	1273.7	1005.1	1477.4	916.6	664.6	1024.1	868.5	389.6	247.4	235.1	168	252.9	102.7	133.7	154.6	413.4	526.1	1701.1
FALSE	High	Master Protein	Q8K2B3	Succinate dehydrogenase [ubiquinone] flavoprotein subunit, mitochondrial OS=Mus musculus OX=10090 GN=Sdha PE=1 SV=1	0	40.043	20	12	17	12	12	664	72.5	7.37	35.76	12	0	1220	942.8	1081.1	510.8	658.4	294.3	331.1	246.2	307.9	589.8	557.5	741.7	1158.9	865.4	593.9	450.4	650.3	483.3	399.1	365.6	773.6	314.4	212.9	117.6	99.5	115.6	47.1	45	56.1	188.4	268.8	741.7
FALSE	High	Master Protein	Q91WP0	Mannan-binding lectin serine protease 2 OS=Mus musculus OX=10090 GN=Masp2 PE=1 SV=1	0	40.009	18	12	21	12	12	685	75.5	6.07	59.8	12	0	970.1	1401.6	1305	1317.4	1803.1	4519.2	5051.8	6301.7	4089.8	1558.3	2432.9	670.9	818.1	802.5	2373.1	4062.8	976.4	4023.8	2092.5	1421.3	615.1	467.4	257	303.3	272.5	1775.3	718.6	1152	745.1	497.8	1173.1	670.9
FALSE	High	Master Protein	Q9WUU7	Cathepsin Z OS=Mus musculus OX=10090 GN=Ctsz PE=1 SV=1	0	39.987	33	10	29	10	10	306	34	6.6	65.52	10	0	2000.1	1813	2256.2	1494.2	2851.3	1740.7	1328	1310.1	1450.7	1411.2	1973.1	1706.6	1795.6	2165.9	660.7	1232.1	1457.9	712.4	724.8	553.1	1268.2	604.6	444.3	344	430.9	683.8	188.9	239.5	264.3	450.8	951.4	1706.6
FALSE	High	Master Protein	Q64669	NAD(P)H dehydrogenase [quinone] 1 OS=Mus musculus OX=10090 GN=Nqo1 PE=1 SV=3	0	39.925	27	9	31	9	9	274	30.9	8.72	87.83	9	0	3661.3	3548.7	2264.3	1129.8	1459.1	1235.6	1022.2	1009.3	1264.1	2787.9	2805.5	5695.9	3727.7	2178.9	1604.8	1322.6	3250.5	1299	1304.1	892.9	2321.6	1183.4	445.9	260.1	220.5	485.4	145.4	184.5	230.3	890.6	1352.8	5695.9
FALSE	High	Master Protein	Q8C166	Copine-1 OS=Mus musculus OX=10090 GN=Cpne1 PE=1 SV=1	0	39.816	20	11	19	10	10	536	58.8	5.66	51.99	11	0	1312.3	1198.9	913.5	1714	999.8	468.4	525.8	435.4	566.5	918.4	1038.2	1603.8	1328	897.2	739.7	335.8	1087.8	343.7	532.6	497.6	832.1	399.8	179.9	394.6	151.1	184	74.8	79.6	103.2	293.4	500.6	1603.8
FALSE	High	Master Protein	Q9R0N0	Galactokinase OS=Mus musculus OX=10090 GN=Galk1 PE=1 SV=2	0	39.815	20	9	21	9	9	392	42.3	5.26	59.1	9	0	2006.4	1851.1	1237	1414.7	890	483.4	370.5	381.3	542.9	1193	1303.8	1995.5	1382.6	1214	1437.9	441.6	1245.2	450.5	557	424.8	1272.2	617.3	243.6	325.7	134.5	189.9	52.7	69.7	98.9	381.1	628.7	1995.5
FALSE	High	Master Protein	Q9JIF0	Protein arginine N-methyltransferase 1 OS=Mus musculus OX=10090 GN=Prmt1 PE=1 SV=1	0	39.8	27	9	18	8	9	371	42.4	5.43	56.66	9	0	1465.6	1255.9	1535.6	1058.6	1287.7	810.8	783.1	681	767.3	1105	1174.2	1304.4	1073.9	1448.3	801.9	479.6	1041.7	553	675.8	1300.5	929.3	418.8	302.4	243.7	194.6	318.5	111.4	124.5	139.8	353	566.2	1304.4
FALSE	High	Master Protein	Q8VCS0	N-acetylmuramoyl-L-alanine amidase OS=Mus musculus OX=10090 GN=Pglyrp2 PE=1 SV=1	0	39.792	20	8	24	8	8	530	57.7	6.98	73.38	8	0	682.4	848.3	1039.5	844.8	1146.1	2149	2155.4	2149.8	2075.4	1104.1	1379.7	412.5	774.5	632.7	1080.6	1897.8	727.5	1185.3	1896.1	1739.8	432.7	282.9	204.7	194.5	173.2	844.2	306.6	393	378.1	352.7	665.3	412.5
FALSE	High	Master Protein	Q9JHQ5	Leucine zipper transcription factor-like protein 1 OS=Mus musculus OX=10090 GN=Lztfl1 PE=1 SV=1	0	39.689	36	10	16	10	10	299	34.8	5.17	53.54	10	0	1267.7	1014.2	996.8	1176.3	1177.8	416	293.2	276.8	349.6	1013	848	1575.5	1431.4	1653.2	1217.2	372.3	1261.2	449.7	561.2	350.9	803.8	338.2	196.3	270.8	178	163.4	41.7	50.6	63.7	323.6	408.9	1575.5
FALSE	High	Master Protein	Q8CHP8	Glycerol-3-phosphate phosphatase OS=Mus musculus OX=10090 GN=Pgp PE=1 SV=1	0	39.675	31	9	19	9	9	321	34.5	5.35	49.77	9	0	1769	2032.5	1735.7	1645	1429.9	828.3	1241.5	1148.2	1233.4	1855.3	1418.7	2565.7	2471.9	2155.3	1717.5	1024.1	1977.9	1143.1	1479.6	1169.4	1121.7	677.8	341.8	378.7	216.1	325.4	176.6	209.9	224.7	592.7	684.1	2565.7
FALSE	High	Master Protein	P21460	Cystatin-C OS=Mus musculus OX=10090 GN=Cst3 PE=1 SV=2	0	39.644	41	6	23	6	6	140	15.5	9	61.33	6	0	708.9	753.6	1253.3	1194.5	1345.2	1455.6	1081.9	822.7	1010.5	1049	849.5	591.1	834.4	1236	1639.4	1092	991.4	1386.1	1385.2	878.6	449.5	251.3	246.8	275	203.3	571.8	153.9	150.4	184.1	335.1	409.6	591.1
FALSE	High	Master Protein	O35215	D-dopachrome decarboxylase OS=Mus musculus OX=10090 GN=Ddt PE=1 SV=3	0	39.641	65	8	20	8	8	118	13.1	6.54	67.45	8	0	2182.4	3680.3	3443.4	1182.4	1886.5	486.2	388.8	381.8	545.6	873	2831.7	1421.8	1484.3	3023.9	323.6	727	1193.6	791.7	750.6	411.4	1383.8	1227.3	678.1	272.2	285.1	191	55.3	69.8	99.4	278.9	1365.4	1421.8
FALSE	High	Master Protein	Q61414	Keratin, type I cytoskeletal 15 OS=Mus musculus OX=10090 GN=Krt15 PE=1 SV=2	0	39.64	17	12	42	1	1	452	49.1	4.86	100.91	12	2	274.1	562.6	936.9	754.5	543.3	532.3	1059.4	1774.5	836	694.9	516.8	537.1	468.5	1014	1223.2	1575.2	575.1	960.5	950.5	389.4	173.8	187.6	184.5	173.7	82.1	209.1	150.7	324.4	152.3	222	249.2	537.1
FALSE	High	Master Protein	O55023	Inositol monophosphatase 1 OS=Mus musculus OX=10090 GN=Impa1 PE=1 SV=1	0	39.545	37	11	19	11	11	277	30.4	5.19	55.33	11	0	1458.3	1527.8	1880.9	1790	1864.7	927.9	647.5	704.6	1239.4	1595.5	1378.7	2379.3	3097.6	2710.4	1200.3	630.7	2144	701.2	1025.3	994.9	924.7	509.5	370.4	412.1	281.8	364.5	92.1	128.8	225.8	509.7	664.8	2379.3
FALSE	High	Master Protein	P47757	F-actin-capping protein subunit beta OS=Mus musculus OX=10090 GN=Capzb PE=1 SV=3	0	39.525	38	11	22	11	11	277	31.3	5.74	67.47	11	0	4366.1	3753.5	5339	3813.8	3208.6	1924.5	2050	1781.1	1635.1	1898.9	3696.3	3018.3	1778.9	1659.7	1983.6	1025.6	2279.1	918.3	1051.8	1767.4	2768.5	1251.7	1051.4	878	484.9	756	291.6	325.6	297.9	606.6	1782.3	3018.3
FALSE	High	Master Protein	Q501J6	Probable ATP-dependent RNA helicase DDX17 OS=Mus musculus OX=10090 GN=Ddx17 PE=1 SV=1	0	39.489	17	11	16	6	6	650	72.4	8.59	45.18	11	0	956	666.3	749.5	409.2	837.1	388.2	437.3	398.8	424.3	205	536.9	278.5	217.5	227	171.6	79.6	212.8	93	126.5	106.1	606.2	222.2	147.6	94.2	126.5	152.5	62.2	72.9	77.3	65.5	258.9	278.5
FALSE	High	Master Protein	O09172	Glutamate--cysteine ligase regulatory subunit OS=Mus musculus OX=10090 GN=Gclm PE=1 SV=1	0	39.485	38	9	20	9	9	274	30.5	5.52	54.31	9	0	1285.5	1073.5	962.8	862.2	727.2	546.5	507.6	438.2	535.7	2410	894.3	3318.3	3068.1	2541.4	2028.4	1575.9	2348	1369.7	1527.1	1774.7	815.1	358	189.6	198.5	109.9	214.7	72.2	80.1	97.6	769.9	431.2	3318.3
FALSE	High	Master Protein	Q64433	10 kDa heat shock protein, mitochondrial OS=Mus musculus OX=10090 GN=Hspe1 PE=1 SV=2	0	39.274	75	9	28	9	9	102	11	8.35	77.89	9	0	5583	4155.6	4539.7	1845.6	2411.2	1177.1	1086.1	1207.8	1395.3	2770	2806.2	3828.3	4104.1	3702.3	984.3	1311.7	3190.4	1149.2	1190.9	1071.1	3540.1	1385.8	894	424.9	364.4	462.4	154.5	220.8	254.2	884.9	1353.1	3828.3
FALSE	High	Master Protein	O55137	Acyl-coenzyme A thioesterase 1 OS=Mus musculus OX=10090 GN=Acot1 PE=1 SV=1	0	39.268	21	9	28	1	2	419	46.1	6.58	71.4	9	0										57		77.3	67.8	84.1	54.7	47.4	72.1	50.8	111.1	33.1										18.2		77.3
FALSE	High	Master Protein	P10493	Nidogen-1 OS=Mus musculus OX=10090 GN=Nid1 PE=1 SV=2	0	39.24	10	12	18	11	12	1245	136.5	5.44	52.33	12	0	494.7	495.4	670.3	949.5	1040.2	1212	3361.1	3888.8	2573.2	1733.3	1468.3	409.3	608.1	591.9	1255.5	1429.9	614.5	7918.3	4774.8	3932.7	313.7	165.2	132	218.6	157.2	476.1	478.1	710.9	468.8	553.7	708	409.3
FALSE	High	Master Protein	P26231	Catenin alpha-1 OS=Mus musculus OX=10090 GN=Ctnna1 PE=1 SV=1	0	39.232	12	13	19	9	13	906	100	6.23	50.87	13	0	1169.4	985.7	1058.3	1350.5	1134.8	782.3	984.2	843.5	777.2	1578.3	872.3	1509.2	1475.9	1566.6	1583.3	824.8	1277.3	1247.4	1473.3	1193.3	741.5	328.7	208.4	310.9	171.5	307.3	140	154.2	141.6	504.2	420.6	1509.2
FALSE	High	Master Protein	Q9D7G0	Ribose-phosphate pyrophosphokinase 1 OS=Mus musculus OX=10090 GN=Prps1 PE=1 SV=4	0	39.183	25	9	22	4	4	318	34.8	6.98	72.8	9	0	889.8	730.2	758.1	607.2	653.1	333.2	288.2	198	286.5	319.3	597.9	494	348.3	385.3	260.9	186.1	358.2	165.4	220.2	209.5	564.2	243.5	149.3	139.8	98.7	130.9	41	36.2	52.2	102	288.3	494
FALSE	High	Master Protein	Q91WG2	Rab GTPase-binding effector protein 2 OS=Mus musculus OX=10090 GN=Rabep2 PE=1 SV=3	0	39.179	19	11	17	11	11	554	62.1	4.89	45.81	11	0	1108.1	954.8	1771.2	731	991.2	698.8	384.5	497.8	458.9	720	833.3	1031.6	898.2	1907.1	584.5	297.1	911.6	353.2	507.4	495.3	702.6	318.4	348.8	168.3	149.8	274.5	54.7	91	83.6	230	401.8	1031.6
FALSE	High	Master Protein	Q60963	Platelet-activating factor acetylhydrolase OS=Mus musculus OX=10090 GN=Pla2g7 PE=1 SV=2	0	39.148	22	10	18	10	10	440	49.2	7.12	54.12	10	0	471.4	627	806.9	890.5	1340.6	2420.4	5717.5	6697.2	3598	1115.3	1970	252.9	386.2	617.2	982.9	1218.3	426.4	1649.7	1756.3	2751.7	298.9	209.1	158.9	205	202.6	950.8	813.3	1224.3	655.5	356.3	949.9	252.9
FALSE	High	Master Protein	Q3U5Q7	UMP-CMP kinase 2, mitochondrial OS=Mus musculus OX=10090 GN=Cmpk2 PE=1 SV=2	0	39.086	23	9	13	9	9	447	50	7.27	41.66	9	0	889.9	729.9	815	1099.4	1016.4	568.7	594.7	552.5	649.9	386	737.9	361.1	325.8	552.7	469.9	162	322.7	223.1	282.4	439.8	564.3	243.4	160.5	253.1	153.6	223.4	84.6	101	118.4	123.3	355.8	361.1
FALSE	High	Master Protein	P24063	Integrin alpha-L OS=Mus musculus OX=10090 GN=Itgal PE=1 SV=2	0	39.056	10	13	16	13	13	1163	128.2	6.11	40.23	13	0	682.7	781.2	634.8	453.5	1026.3	363.8	348	474.3	432	1519.5	586.1	1979.2	2096.8	2959.4	848.2	1308	2469.6	998.4	1801.7	818.3	432.9	260.5	125	104.4	155.1	142.9	49.5	86.7	78.7	485.4	282.6	1979.2
FALSE	High	Master Protein	Q9EPU0	Regulator of nonsense transcripts 1 OS=Mus musculus OX=10090 GN=Upf1 PE=1 SV=2	0	39.012	12	13	17	12	13	1124	123.9	6.61	38.9	13	0	860.1	751.8	686	1043.4	712.7	456.7	575.1	446.9	413.3	578.8	618.4	658.4	485.2	573.1	1002.1	316.8	572.6	454	390.7	407.8	545.4	250.7	135.1	240.2	107.7	179.4	81.8	81.7	75.3	184.9	298.2	658.4
FALSE	High	Master Protein	Q8C255	Dipeptidase 2 OS=Mus musculus OX=10090 GN=Dpep2 PE=1 SV=1	0	39.007	23	9	16	9	9	478	52.6	7.08	58.84	9	0	1694.1	2121	2329.8	2051.5	3243.7	2770.1	3479.9	3283.2	2495.8	1864.4	2425.8	1805.3	1893.8	2074.4	1768.9	1846.7	2032.3	1726.3	1918.5	2148	1074.2	707.3	458.8	472.3	490.2	1088.2	495	600.2	454.7	595.6	1169.7	1805.3
FALSE	High	Master Protein	Q64471	Glutathione S-transferase theta-1 OS=Mus musculus OX=10090 GN=Gstt1 PE=1 SV=4	0	38.929	36	10	27	10	10	240	27.4	7.27	79.68	10	0	2909.6	2987.6	2153.6	3566.6	1451.8	978.8	602.5	534.4	1194.4	3001.4	2488.9	5348.9	3520.7	1966.7	3104.4	1570.8	3222	1294.7	1741.6	1454.4	1844.9	996.3	424.1	821.1	219.4	384.5	85.7	97.7	217.6	958.8	1200.1	5348.9
FALSE	High	Master Protein	Q64010	Adapter molecule crk OS=Mus musculus OX=10090 GN=Crk PE=1 SV=1	0	38.921	34	10	18	10	10	304	33.8	5.55	47.25	10	0	1156.9	1071.7	829.7	1072	745.1	444.2	368.4	341.3	328.2	1396.8	859.4	1670	2176.9	1734.8	1488.8	560.6	1297.8	786.5	967.3	753.7	733.6	357.4	163.4	246.8	112.6	174.5	52.4	62.4	59.8	446.2	414.4	1670
FALSE	High	Master Protein	P62827	GTP-binding nuclear protein Ran OS=Mus musculus OX=10090 GN=Ran PE=1 SV=3	0	38.893	28	6	19	3	6	216	24.4	7.49	60.03	6	0	4244.2	3660.2	3586.6	2976.7	2781.1	1754.2	1649.9	1450.7	1811.9	1732.6	2753.7	2244.3	1991.5	2033.6	1903.1	835	1831.2	1241.3	1094.5	1065.9	2691.2	1220.6	706.3	685.3	420.3	689.1	234.7	265.2	330.1	553.5	1327.8	2244.3
FALSE	High	Master Protein	Q91YR1	Twinfilin-1 OS=Mus musculus OX=10090 GN=Twf1 PE=1 SV=2	0	38.885	29	11	24	8	8	350	40.1	6.67	63.6	11	3	2168	2067.6	1730.1	2068.5	1659.6	901.2	979.3	890.5	1100.5	1379.9	1630.5	1926.7	1731.7	1533.2	1706.7	622.6	1612.7	732.2	874.3	812.9	1374.7	689.5	340.7	476.2	250.8	354	139.3	162.8	200.5	440.8	786.2	1926.7
FALSE	High	Master Protein	P43025	Tetranectin OS=Mus musculus OX=10090 GN=Clec3b PE=1 SV=2	0	38.815	35	6	21	6	6	202	22.2	5.66	59.36	6	0	1032.2	1016	946.5	1155.9	1169.9	2823.6	3747	3300.2	2680.2	1131.6	1427.4	471.9	728.7	635.1	776.2	1283.2	631.4	2206.1	1836.7	1019.2	654.5	338.8	186.4	266.1	176.8	1109.2	533	603.3	488.3	361.5	688.3	471.9
FALSE	High	Master Protein	Q00724	Retinol-binding protein 4 OS=Mus musculus OX=10090 GN=Rbp4 PE=1 SV=2	0	38.735	43	7	22	7	7	201	23.2	5.99	66.17	7	0	828.8	1308.6	2181	1367.4	2143.9	8752.4	2420.4	2584.1	4334.6	1886.3	2823.8	304.2	764.8	1311.9	3354.6	4478.1	812.6	3258.8	2523.7	2812.9	525.5	436.4	429.5	314.8	324	3438.2	344.3	472.4	789.7	602.6	1361.6	304.2
FALSE	High	Master Protein	P70699	Lysosomal alpha-glucosidase OS=Mus musculus OX=10090 GN=Gaa PE=1 SV=2	0	38.716	10	11	21	11	11	953	106.2	5.83	53.9	11	0	1187.5	1403.1	1518.3	778	1963.9	808	612.3	659.7	784.4	1545.1	923.5	1834.6	2428.8	2611.6	1253.2	962	2140.9	790.8	1058.8	631.3	753	467.9	299	179.1	296.8	317.4	87.1	120.6	142.9	493.6	445.3	1834.6
FALSE	High	Master Protein	P35278	Ras-related protein Rab-5C OS=Mus musculus OX=10090 GN=Rab5c PE=1 SV=2	0	38.696	41	7	21	4	4	216	23.4	8.41	70.76	7	4	1458.5	1208.8	1067.4	2627.1	853.6	757.8	919.5	905.3	864.5	1840.6	1273.8	2655.4	2014.9	1563.4	2577.4	951.1	2041.1	1138	1329.3	1515.8	924.8	403.1	210.2	604.8	129	297.7	130.8	165.5	157.5	588	614.2	2655.4
FALSE	High	Master Protein	P70670	Nascent polypeptide-associated complex subunit alpha, muscle-specific form OS=Mus musculus OX=10090 GN=Naca PE=1 SV=2	0	38.672	4	6	16	0	6	2187	220.4	9.35	57.5	6	0	344.3	290	275.7	199.8	140.9	79.4	101.2	83.7	95.5	412	243.5	594.7	461	496.4	314.7	108.8	525.6	175.7	234.8	359.7	218.3	96.7	54.3	46	21.3	31.2	14.4	15.3	17.4	131.6	117.4	594.7
FALSE	High	Master Protein	Q61391	Neprilysin OS=Mus musculus OX=10090 GN=Mme PE=1 SV=3	0	38.656	16	14	19	13	14	750	85.6	5.81	50.87	14	0	1518.9	1903	1493.4	886.1	2898.9	814.3	681.9	664.6	1547.3	631.7	1186.9	760	819	905.4	450.8	400	960.3	370.4	351.5	233.3	963.1	634.6	294.1	204	438.1	319.9	97	121.5	281.9	201.8	572.3	760
FALSE	High	Master Protein	Q9CQ60	6-phosphogluconolactonase OS=Mus musculus OX=10090 GN=Pgls PE=1 SV=1	0	38.634	44	9	18	9	9	257	27.2	5.85	49.69	9	0	1879.9	1774.6	1395.4	2541.5	1236.7	585.2	674.2	583.7	842	1265.6	1301.1	2171.5	1931.2	1415.6	1595.9	367.2	1448.9	550.5	548.6	481.5	1192	591.8	274.8	585.1	186.9	229.9	95.9	106.7	153.4	404.3	627.4	2171.5
FALSE	High	Master Protein	P70429	Ena/VASP-like protein OS=Mus musculus OX=10090 GN=Evl PE=1 SV=2	0	38.621	31	11	16	11	11	414	44.3	8.85	44.07	11	0	294.1	229.7	192.5	265.4	336.1	209	157.5	224.8	218.5	434.2	297.4	681.8	479.5	677.6	230.1	235.8	587.6	236.9	281	213.3	186.5	76.6	37.9	61.1	50.8	82.1	22.4	41.1	39.8	138.7	143.4	681.8
FALSE	High	Master Protein	P07309	Transthyretin OS=Mus musculus OX=10090 GN=Ttr PE=1 SV=1	0	38.617	48	6	27	6	6	147	15.8	6.16	98.73	6	0	1529	2641.3	3423.6	2241.3	5957.3	4699.2	3732.2	3090.7	3732.4	3228	3589.5	2673.7	4756.2	4784.8	2552.6	4966.4	7114.8	3471.6	3529.4	3124.1	969.5	880.8	674.2	516	900.3	1846	530.9	565	680	1031.2	1730.8	2673.7
FALSE	High	Master Protein	P84091	AP-2 complex subunit mu OS=Mus musculus OX=10090 GN=Ap2m1 PE=1 SV=1	0	38.61	27	13	20	13	13	435	49.6	9.54	54.54	13	0	1520.1	1497.3	1252.7	2347.3	1353.2	1246.1	1545.2	1611	1606.6	2234.1	1489.5	2430.9	1841.4	1863	3383.5	1431.4	2595.8	1945.1	2319.6	2444.5	963.9	499.3	246.7	540.4	204.5	489.5	219.8	294.5	292.7	713.7	718.2	2430.9
FALSE	High	Master Protein	Q9CZX8	40S ribosomal protein S19 OS=Mus musculus OX=10090 GN=Rps19 PE=1 SV=3	0	38.578	51	10	20	10	10	145	16.1	10.4	59.92	10	0	3732.6	3156.1	3919.2	1916	2453.6	844.4	849.9	756	837.1	2840.5	2083	4888.1	3967.6	4286	2894	1336.5	3932.4	1629.8	1416.7	1106.2	2366.8	1052.5	771.8	441.1	370.8	331.7	120.9	138.2	152.5	907.4	1004.4	4888.1
FALSE	High	Master Protein	Q3UV17	Keratin, type II cytoskeletal 2 oral OS=Mus musculus OX=10090 GN=Krt76 PE=1 SV=1	0	38.541	10	8	23	1	2	594	62.8	8.43	65.24	8	0	424.7	1176.1	2410	1771.8	850.3	1074.5	3496	3607.6	2428.3	329.3	1109.1	114.2	198.6	519.2	596.7	1016.8	261	817.5	491.3	124.9	269.3	392.2	474.6	407.9	128.5	422.1	497.3	659.5	442.4	105.2	534.8	114.2
FALSE	High	Master Protein	Q9JHC0	Glutathione peroxidase 2 OS=Mus musculus OX=10090 GN=Gpx2 PE=2 SV=3	0	38.502	48	9	18	9	9	190	22	7.77	62.45	9	0	2391.5	2448.2	2609.1	599	1007.1	447.3	446.4	346.3	574.1	639.2	1464.2	1383.7	1164.6	1728.3	530.3	356.2	871.4	380.8	383	304.4	1516.4	816.4	513.8	137.9	152.2	175.7	63.5	63.3	104.6	204.2	706	1383.7
FALSE	High	Master Protein	P50544	Very long-chain specific acyl-CoA dehydrogenase, mitochondrial OS=Mus musculus OX=10090 GN=Acadvl PE=1 SV=3	0	38.486	14	10	19	10	10	656	70.8	8.75	54.89	10	0	2426.3	1739.3	1819.5	1225.8	1609.3	656	660.1	626.9	744.8	1089.4	1251.2	1724.4	1391.4	1029.5	855.7	681	1435.4	727.1	601.7	464.7	1538.5	580	358.3	282.2	243.2	257.7	93.9	114.6	135.7	348	603.3	1724.4
FALSE	High	Master Protein	Q923D2	Flavin reductase (NADPH) OS=Mus musculus OX=10090 GN=Blvrb PE=1 SV=3	0	38.405	52	9	24	9	9	206	22.2	7.01	70.59	9	0	3031	2952.5	1995.7	1979	1435.9	1090	1086.8	930.5	1011.1	1789.9	1941.1	2914	2399.2	1648.3	1206.4	1251.8	1884.6	809.8	1162.3	1041.8	1921.9	984.6	393	455.6	217	428.2	154.6	170.1	184.2	571.8	936	2914
FALSE	High	Master Protein	Q99KD5	Protein unc-45 homolog A OS=Mus musculus OX=10090 GN=Unc45a PE=1 SV=2	0	38.231	12	13	18	12	13	944	103.4	6.34	43.74	13	0	1085	889.7	879.5	1135	927.7	498.9	490	436	443.5	929.4	751.4	1322.5	961.2	1070.3	1624.4	400	1045.6	472.1	522.1	472.2	688	296.7	173.2	261.3	140.2	196	69.7	79.7	80.8	296.9	362.3	1322.5
FALSE	High	Master Protein	Q9D1G1	Ras-related protein Rab-1B OS=Mus musculus OX=10090 GN=Rab1b PE=1 SV=1	0	38.216	51	10	26	4	4	201	22.2	5.73	66.76	10	0	787.1	665.7	689.1	1057.3	612.1	470.2	616.5	663.5	536.3	1042.4	847	1288.5	1022.4	927.4	1226.5	621.9	1038.6	889.9	1429.9	973.8	499.1	222	135.7	243.4	92.5	184.7	87.7	121.3	97.7	333	408.4	1288.5
FALSE	High	Master Protein	P01897	H-2 class I histocompatibility antigen, L-D alpha chain OS=Mus musculus OX=10090 GN=H2-L PE=1 SV=2	0	38.171	24	8	18	0	5	362	40.7	6.25	51.54	8	1	170.8	193.7	234.1	106	173.4	274.4	239	250.5	253.6	278.9	194.9	231.6	246.6	284.9	212.3	329.9	235.3	286.9	262.8	373.3	108.3	64.6	46.1	24.4	26.2	107.8	34	45.8	46.2	89.1	94	231.6
FALSE	High	Master Protein	P51660	Peroxisomal multifunctional enzyme type 2 OS=Mus musculus OX=10090 GN=Hsd17b4 PE=1 SV=3	0	38.17	15	11	19	11	11	735	79.4	8.57	44.59	11	0	1769.5	1289.4	1477.2	1116.3	1299.6	524.9	596.1	602.8	624.1	1649.1	1095.8	2886.2	1684.2	1778.9	1143.7	1025.6	2194.8	894.2	1128.7	642.6	1122	430	290.9	257	196.4	206.2	84.8	110.2	113.7	526.8	528.4	2886.2
FALSE	High	Master Protein	Q8CIF4	Biotinidase OS=Mus musculus OX=10090 GN=Btd PE=1 SV=2	0	38.106	16	8	18	8	8	520	58.1	5.8	58.14	8	0	1203.8	1556.9	1412.2	1651.9	1857.4	2400.3	2218	2298.6	2364.1	1343.2	1875.2	873	1014	1116.8	1515.5	1681.8	1087.6	1425.7	2000.2	2362.2	763.3	519.2	278.1	380.3	280.7	942.9	315.5	420.2	430.7	429.1	904.2	873
FALSE	High	Master Protein	Q9WV32	Actin-related protein 2/3 complex subunit 1B OS=Mus musculus OX=10090 GN=Arpc1b PE=1 SV=4	0	38.09	25	9	22	9	9	372	41	8.35	71.13	9	0	5679.2	4930.5	4280.3	4897.9	4923.1	3778.5	4428.9	4575.3	3884.5	2864.6	6073.3	4057.1	2006.9	2285.1	2378.7	1400	3369	1433.4	2186.1	3876.3	3601.1	1644.2	842.9	1127.6	744	1484.3	630	836.4	707.7	915.1	2928.5	4057.1
FALSE	High	Master Protein	P31324	cAMP-dependent protein kinase type II-beta regulatory subunit OS=Mus musculus OX=10090 GN=Prkar2b PE=1 SV=3	0	38.087	25	9	15	7	7	416	46.1	4.98	44.28	9	2	1771.1	1567.1	1626	1239.7	1494.8	1237.2	1093.2	1001.6	1114.2	643.9	1370	990.7	951.1	1066.2	399.3	205.1	820.1	247.2	229.9	266.1	1123	522.6	320.2	285.4	225.9	486	155.5	183.1	203	205.7	660.6	990.7
FALSE	High	Master Protein	Q07417	Short-chain specific acyl-CoA dehydrogenase, mitochondrial OS=Mus musculus OX=10090 GN=Acads PE=1 SV=2	0	38.056	24	10	17	10	10	412	44.9	8.47	45.41	10	0	1077.8	850.4	872.4	637.7	937	356.9	460.5	854.4	573.6	662.4	657	1178.8	761.7	729	403.1	452.6	957.7	344.6	413	320.3	683.4	283.6	171.8	146.8	141.6	140.2	65.5	156.2	104.5	211.6	316.8	1178.8
FALSE	High	Master Protein	Q8BFR4	N-acetylglucosamine-6-sulfatase OS=Mus musculus OX=10090 GN=Gns PE=1 SV=1	0	38.056	19	10	17	10	10	544	61.1	8.24	47.06	10	0	3052.1	2601.7	2660.9	2227.4	2809.6	922	1046.1	932.7	1362.9	2343.7	2128.4	3514.1	2395.7	2289.1	1410.7	1356.9	3922.8	1153.5	768.8	639.9	1935.3	867.6	524	512.8	424.6	362.2	148.8	170.5	248.3	748.7	1026.3	3514.1
FALSE	High	Master Protein	O35344	Importin subunit alpha-4 OS=Mus musculus OX=10090 GN=Kpna3 PE=1 SV=1	0	37.944	17	9	18	4	4	521	57.7	4.94	55.79	9	5	2129.2	1738.7	1523.4	1499.9	2415.2	997.6	1071.4	1015.8	955.1	789.5	1510.6	1337	903.1	1045.8	818.3	432.8	897.3	551.3	575.9	467.4	1350.1	579.8	300	345.3	365	391.9	152.4	185.7	174	252.2	728.4	1337
FALSE	High	Master Protein	Q8BI29	Specifically androgen-regulated gene protein OS=Mus musculus OX=10090 GN=Sarg PE=1 SV=2	0	37.905	18	10	15	10	10	606	65.1	9.14	41.84	10	0	1215.9	1066.6	1286.3	886.1	639.9	404.8	555.4	305.8	385.3	933.2	874.3	1528.8	1044.4	1009.9	1130.7	354	987.8	542.7	515.8	405.1	771	355.7	253.3	204	96.7	159	79	55.9	70.2	298.1	421.6	1528.8
FALSE	High	Master Protein	Q61081	Hsp90 co-chaperone Cdc37 OS=Mus musculus OX=10090 GN=Cdc37 PE=1 SV=1	0	37.849	26	9	17	9	9	379	44.6	5.34	50.32	9	0	897.5	732.9	668.3	665	547.2	390	362.7	291.6	261.3	543.4	651.6	583.7	562.7	530.7	457.8	517.5	545.6	378.2	402.6	561.3	569.1	244.4	131.6	153.1	82.7	153.2	51.6	53.3	47.6	173.6	314.2	583.7
FALSE	High	Master Protein	Q8CFI0	E3 ubiquitin-protein ligase NEDD4-like OS=Mus musculus OX=10090 GN=Nedd4l PE=1 SV=2	0	37.732	11	12	20	8	8	1004	115.3	6.15	58.87	12	1	1285.3	1234.6	978	859.2	870.8	475.8	340.3	409.7	419.9	776.9	870.4	1394.8	889	867.8	955.8	340.1	1025.6	359.2	509.5	438.9	815	411.7	192.6	197.8	131.6	186.9	48.4	74.9	76.5	248.2	419.7	1394.8
FALSE	High	Master Protein	Q9CQW1	Synaptobrevin homolog YKT6 OS=Mus musculus OX=10090 GN=Ykt6 PE=1 SV=1	0	37.6	45	9	19	9	9	198	22.3	6.35	60.98	9	0	2716.7	2435	2058.1	4894	1923.6	1100.2	1228.9	996.1	886.5	2433.8	2210.3	3602.4	3026.7	1882.6	5081.4	922.6	2362.3	1461.9	1413.9	1169.4	1722.6	812	405.3	1126.7	290.7	432.2	174.8	182.1	161.5	777.5	1065.8	3602.4
FALSE	High	Master Protein	Q9CY58	Plasminogen activator inhibitor 1 RNA-binding protein OS=Mus musculus OX=10090 GN=Serbp1 PE=1 SV=2	0	37.589	22	10	18	10	10	407	44.7	8.54	49.15	10	0	1348.1	1184.8	1326.4	1006	1583.5	541.5	634.8	564.5	511.6	1222.7	923.1	1809.7	1269.4	1568.3	900.1	578.1	1691.7	683.1	803.7	852.5	854.8	395.1	261.2	231.6	239.3	212.7	90.3	103.2	93.2	390.6	445.1	1809.7
FALSE	High	Master Protein	P31938	Dual specificity mitogen-activated protein kinase kinase 1 OS=Mus musculus OX=10090 GN=Map2k1 PE=1 SV=2	0	37.557	30	10	15	6	6	393	43.4	6.7	33.15	10	4	1407.2	1255	1086.2	1695.3	960.8	757.3	645.4	606.6	699.8	403.8	1154.3	565.8	668.8	841.7	462	162	381.3	212.8	538.1	277.9	892.3	418.5	213.9	390.3	145.2	297.5	91.8	110.9	127.5	129	556.6	565.8
FALSE	High	Master Protein	Q9R0E2	Procollagen-lysine,2-oxoglutarate 5-dioxygenase 1 OS=Mus musculus OX=10090 GN=Plod1 PE=1 SV=1	0	37.527	17	13	17	13	13	728	83.5	6.54	45.69	13	0	766.8	710.1	775.9	629.8	1320.1	1124.1	783.8	722.1	870.5	1182.6	780.8	1044.9	1085.4	1104.6	959.5	1121.2	1231.4	1259.4	1087.5	1305.7	486.2	236.8	152.8	145	199.5	441.6	111.5	132	158.6	377.8	376.5	1044.9
FALSE	High	Master Protein	Q62159	Rho-related GTP-binding protein RhoC OS=Mus musculus OX=10090 GN=Rhoc PE=1 SV=2	0	37.471	37	6	27	1	1	193	22	6.58	83.78	6	0										97.7		125.8	92.5	83.3	95.9	47.4	93.6	79.3	71.3	65.5										31.2		125.8
FALSE	High	Master Protein	Q9EQU5	Protein SET OS=Mus musculus OX=10090 GN=Set PE=1 SV=1	0	37.451	30	8	22	8	8	289	33.4	4.32	70.37	8	0	1655.9	1260.4	1305.6	658.1	1442.5	553.9	751.5	659.2	607.1	1081.2	1030.5	1587.7	1339	1786.3	590.6	624.1	1821.9	553.9	513	703.2	1050	420.3	257.1	151.5	218	217.6	106.9	120.5	110.6	345.4	496.9	1587.7
FALSE	High	Master Protein	Q9Z0J0	NPC intracellular cholesterol transporter 2 OS=Mus musculus OX=10090 GN=Npc2 PE=1 SV=1	0	37.378	45	7	25	7	7	149	16.4	7.68	85.9	7	0	6826.2	5834.6	12286.3	4083.1	11331.7	6395.4	2777.6	2733.5	2778.5	5469.3	4395.6	4335.9	5084.7	14013.3	2044.3	5289.8	4993	2739.4	2439.8	1942.4	4328.4	1945.7	2419.5	940	1712.5	2512.3	395.1	499.7	506.2	1747.2	2119.5	4335.9
FALSE	High	Master Protein	Q91VF2	Histamine N-methyltransferase OS=Mus musculus OX=10090 GN=Hnmt PE=1 SV=1	0	37.34	37	10	20	10	10	295	33.6	5.06	48.27	10	0	3011.6	2889.9	2118.5	927.8	1083.2	838.3	532.9	521.9	680.6	536.9	2101.9	1071.3	664	336.4	457.8	283.9	668.2	248.1	278.9	197	1909.6	963.7	417.2	213.6	163.7	329.3	75.8	95.4	124	171.5	1013.5	1071.3
FALSE	High	Master Protein	P47754	F-actin-capping protein subunit alpha-2 OS=Mus musculus OX=10090 GN=Capza2 PE=1 SV=3	0	37.329	41	8	15	6	6	286	32.9	5.85	64.67	8	2	2170.7	1842.7	1475.7	2709.2	1670.1	941.9	1078.4	872	706.4	2225	1843.3	3143.4	1949.3	2061.4	1812.9	940.2	2449.4	883	1077.7	1843.6	1376.4	614.5	290.6	623.7	252.4	370	153.4	159.4	128.7	710.8	888.8	3143.4
FALSE	High	Master Protein	Q99NB1	Acetyl-coenzyme A synthetase 2-like, mitochondrial OS=Mus musculus OX=10090 GN=Acss1 PE=1 SV=1	0	37.324	17	12	23	12	12	682	74.6	6.98	56.71	12	0	3004.5	2990.6	2741.6	1159.3	1377.7	1045.7	1086.8	1255.4	1227.9	3519.4	2899.3	3882.3	3100.2	2733.3	1220.9	1572.3	2878.8	1249.9	1534.1	1692.4	1905.1	997.3	539.9	266.9	208.2	410.8	154.6	229.5	223.7	1124.3	1398	3882.3
FALSE	High	Master Protein	P63001	Ras-related C3 botulinum toxin substrate 1 OS=Mus musculus OX=10090 GN=Rac1 PE=1 SV=1	0	37.297	34	6	20	2	2	192	21.4	8.5	62.26	6	3	2078.1	1904.8	1457.4	5438.3	1310.2	1243.8	1602.8	1241.7	1372.8	1234	2162.2	1777.1	1971.7	965.8	1467.8	459.9	1279.6	515.1	747.8	966.6	1317.7	635.2	287	1252	198	488.6	228	227	250.1	394.2	1042.6	1777.1
FALSE	High	Master Protein	Q8CHT0	Delta-1-pyrroline-5-carboxylate dehydrogenase, mitochondrial OS=Mus musculus OX=10090 GN=Aldh4a1 PE=1 SV=3	0	37.255	20	12	21	12	12	562	61.8	8.24	59.87	12	0	2598.2	2076.6	1854.5	592	1049.5	403.2	401.4	376.3	458.9	1713.5	1222.5	3270	2518.6	1735.6	1713.7	492.7	2347.7	673.6	578.7	467.9	1647.5	692.5	365.2	136.3	158.6	158.4	57.1	68.8	83.6	547.4	589.5	3270
FALSE	High	Master Protein	P49443	Protein phosphatase 1A OS=Mus musculus OX=10090 GN=Ppm1a PE=1 SV=1	0	37.208	26	10	17	7	7	382	42.4	5.36	48.47	10	3	932.7	980.3	982.6	871.8	698.1	466.6	545.5	640.6	555.5	1133.5	799.1	1273.9	1710.6	1406.6	711.7	556.2	1243.3	642.6	916.2	1045.7	591.4	326.9	193.5	200.7	105.5	183.3	77.6	117.1	101.2	362.1	385.3	1273.9
FALSE	High	Master Protein	P04117	Fatty acid-binding protein, adipocyte OS=Mus musculus OX=10090 GN=Fabp4 PE=1 SV=3	0	37.207	48	6	25	5	6	132	14.6	8.4	88.38	6	0	4912.9	3677.3	4411.8	2934.6	2172.4	1486.6	2164.5	1129.6	1230.6	3124.4	2183.4	2676.1	2863.3	3963.6	1546.8	1659.1	4104.8	1774.6	980.5	889.3	3115.2	1226.3	868.8	675.6	328.3	584	307.9	206.5	224.2	998.1	1052.8	2676.1
FALSE	High	Master Protein	Q9Z1G3	V-type proton ATPase subunit C 1 OS=Mus musculus OX=10090 GN=Atp6v1c1 PE=1 SV=4	0	37.201	27	12	21	11	11	382	43.9	7.46	61.8	12	1	2690.8	2223.8	1679.3	2309.5	2075.1	1345.4	959.6	787.7	1072.5	1692.6	2339.1	2769	1671.9	2167.5	1586.6	1084.7	2018.8	938.1	924.6	1057.9	1706.2	741.6	330.7	531.7	313.6	528.5	136.5	144	195.4	540.7	1127.9	2769
FALSE	High	Master Protein	Q99KP3	Lambda-crystallin homolog OS=Mus musculus OX=10090 GN=Cryl1 PE=1 SV=3	0	37.088	29	10	21	10	10	319	35.2	5.86	58.56	10	0	2411.7	2432.6	2081.5	1548.1	1431.3	921.3	859.1	680.5	816.7	2126.1	1586.3	3490.9	3247.3	2782.2	1508.9	1097.1	2664.2	1268	2197.3	725.8	1529.2	811.2	409.9	356.4	216.3	361.9	122.2	124.4	148.8	679.2	764.9	3490.9
FALSE	High	Master Protein	Q9JL62	Glycolipid transfer protein OS=Mus musculus OX=10090 GN=Gltp PE=1 SV=3	0	36.937	35	8	18	8	8	209	23.7	7.39	57.68	8	0	2649.5	2387.3	1829.1	2914.2	1498.1	870.1	725.5	542.6	621.3	1409.6	1997.8	2590.1	2165.4	1329.1	1219.5	424.1	1672.8	528.9	469.7	368.4	1680	796.1	360.2	670.9	226.4	341.8	103.2	99.2	113.2	450.3	963.3	2590.1
FALSE	High	Master Protein	Q8BYA0	Tubulin-specific chaperone D OS=Mus musculus OX=10090 GN=Tbcd PE=1 SV=1	0	36.914	10	12	18	12	12	1196	133.2	6.51	43.09	12	0	1448.1	1311	1148.1	2585.4	1149.4	971.4	929.4	990.1	1086.3	1051.5	1361.7	1106.4	955	1062.1	1855.9	556.9	933.3	754.6	940.7	981.5	918.2	437.2	226.1	595.2	173.7	381.6	132.2	181	197.9	335.9	656.6	1106.4
FALSE	High	Master Protein	P70375	Coagulation factor VII OS=Mus musculus OX=10090 GN=F7 PE=1 SV=1	0	36.884	24	12	20	12	12	446	50.2	6.64	54.08	12	0	2357.4	2515.6	2866	2043.3	4347.4	2069.8	1607.1	1428.3	1508.3	2779.7	2197.9	3542.5	4589.8	4229.7	2952.9	3578.8	4903.9	2635.1	1434.1	922.8	1494.8	838.9	564.4	470.4	657	813.1	228.6	261.1	274.8	888	1059.8	3542.5
FALSE	High	Master Protein	Q80UM3	N-alpha-acetyltransferase 15, NatA auxiliary subunit OS=Mus musculus OX=10090 GN=Naa15 PE=1 SV=1	0	36.83	13	12	16	11	12	865	100.9	7.62	42.55	12	0	1045.9	975.2	811.5	976.5	727.9	454.6	488.6	419	499.5	990.7	769.6	1180	938.7	765	1496.3	696.4	1107.5	790.8	773.7	800.9	663.2	325.2	159.8	224.8	110	178.6	69.5	76.6	91	316.5	371.1	1180
FALSE	High	Master Protein	P62196	26S proteasome regulatory subunit 8 OS=Mus musculus OX=10090 GN=Psmc5 PE=1 SV=1	0	36.819	26	10	15	9	9	406	45.6	7.55	45.94	10	0	1471.4	1322.7	1119.7	1704.9	1253.3	844.4	821.1	637.3	1784.4	1420.2	1785.6	1646.6	1336.3	1139.7	1352.8	535	1343.9	796	905.1	1543.2	933	441.1	220.5	392.5	189.4	331.7	116.8	116.5	325.1	453.7	861	1646.6
FALSE	High	Master Protein	Q6ZWX6	Eukaryotic translation initiation factor 2 subunit 1 OS=Mus musculus OX=10090 GN=Eif2s1 PE=1 SV=3	0	36.783	34	11	24	11	11	315	36.1	5.08	69.51	11	0	3023.4	2437.7	2451.7	2395.5	2340.4	1418.2	1585.3	1545.9	1422.7	1998.4	2449.4	2489.3	1918	2143.8	2070.5	1242.3	2132.1	1310.2	1671.8	1791.2	1917.1	812.9	482.8	551.5	353.7	557.1	225.5	282.6	259.2	638.4	1181.1	2489.3
FALSE	High	Master Protein	Q8K023	Aldo-keto reductase family 1 member C18 OS=Mus musculus OX=10090 GN=Akr1c18 PE=1 SV=2	0	36.783	29	11	20	6	11	323	37.2	6.46	55.08	11	0	3172.8	2529.7	2446.6	2846	2712.3	812.1	651.7	623.6	665.8	3343.5	2133.2	6131.7	7052	3963.6	2241.7	1533.6	3983.8	1349.9	1353.8	1064.3	2011.8	843.6	481.8	655.2	409.9	319	92.7	114	121.3	1068.1	1028.6	6131.7
FALSE	High	Master Protein	Q08093	Calponin-2 OS=Mus musculus OX=10090 GN=Cnn2 PE=1 SV=1	0	36.764	29	9	22	7	7	305	33.1	7.62	58.06	9	2	1175.9	1174.6	856.2	3249.5	1053.4	649.6	841.5	609.4	674.6	1143.8	1028.4	1040.5	1856.8	1632	1943.3	420.4	834.9	775.3	947.7	758.5	745.6	391.7	168.6	748.1	159.2	255.2	119.7	111.4	122.9	365.4	495.9	1040.5
FALSE	High	Master Protein	Q6WVG3	BTB/POZ domain-containing protein KCTD12 OS=Mus musculus OX=10090 GN=Kctd12 PE=1 SV=1	0	36.739	33	11	16	9	11	327	35.9	5.81	49.43	11	0	2627.1	2784.9	2418.7	1774.4	2713.6	2319.3	1942.4	2132.8	2004	2724.6	2847.2	3465.5	2414.2	2793.7	1821.8	1529.2	3455.3	1108.7	1773.1	3470.9	1665.8	928.7	476.3	408.5	410.1	911.1	276.3	389.9	365.1	870.4	1372.9	3465.5
FALSE	High	Master Protein	Q8QZY1	Eukaryotic translation initiation factor 3 subunit L OS=Mus musculus OX=10090 GN=Eif3l PE=1 SV=1	0	36.689	21	12	20	12	12	564	66.6	6.44	61.28	12	0	1428.5	1340.4	1364	1455.6	1454.4	979.6	1080.5	1073.3	1006.7	1625.3	1298.7	1504.1	1230.2	1761.8	1963.4	1041.6	1360	1243.1	1471.2	2048.1	905.8	447	268.6	335.1	219.8	384.8	153.7	196.2	183.4	519.2	626.2	1504.1
FALSE	High	Master Protein	Q63932	Dual specificity mitogen-activated protein kinase kinase 2 OS=Mus musculus OX=10090 GN=Map2k2 PE=1 SV=2	0	36.598	27	9	16	5	5	401	44.4	7.05	37.44	9	0	638.7	572.2	580.9	871.8	739.1	325.6	350.1	310.2	309.6	212.9	510.6	350.2	248.8	256.3	303.5	131.4	263.1	135.2	130.7	127.8	405	190.8	114.4	200.7	111.7	127.9	49.8	56.7	56.4	68	246.2	350.2
FALSE	High	Master Protein	Q78ZA7	Nucleosome assembly protein 1-like 4 OS=Mus musculus OX=10090 GN=Nap1l4 PE=1 SV=1	0	36.587	26	8	15	7	7	375	42.7	4.67	41.83	8	1	593.5	612.3	561.6	385.3	648.5	273.4	240.4	219.4	262.9	1204.9	497.1	1700.1	1395.3	1529.9	985.7	542.3	1521.7	632.3	646.5	781.1	376.3	204.2	110.6	88.7	98	107.4	34.2	40.1	47.9	384.9	239.7	1700.1
FALSE	High	Master Protein	Q9ET22	Dipeptidyl peptidase 2 OS=Mus musculus OX=10090 GN=Dpp7 PE=1 SV=2	0	36.583	20	10	18	10	10	506	56.2	5.39	41.79	10	0	1811	1362.3	1516.3	614.6	1352.5	589.3	253.1	222.6	370	599.5	1023.9	655	804.9	947	316.1	532.8	683.5	557.4	1033	270	1148.3	454.3	298.6	141.5	204.4	231.5	36	40.7	67.4	191.5	493.7	655
FALSE	High	Master Protein	Q62165	Dystroglycan OS=Mus musculus OX=10090 GN=Dag1 PE=1 SV=4	0	36.533	12	10	21	10	10	893	96.8	8.44	64.72	10	0	1537	1886.5	2100.3	2043.7	2785.8	1910.5	2066.1	1573.8	1775.7	1153.8	1720.5	1224.5	1420	1520.9	1447.2	843.1	1724.7	1718.6	1283.9	845.3	974.6	629.1	413.6	470.5	421	750.5	293.9	287.7	323.5	368.6	829.6	1224.5
FALSE	High	Master Protein	P70274	Selenoprotein P OS=Mus musculus OX=10090 GN=Selenop PE=1 SV=3	0	36.485	22	8	18	8	8	380	42.7	7.09	61.45	8	0	1166.2	1620.8	1616.3	1463.4	1329.4	2413.5	3257.7	3973	3281.8	4207.5	2170.3	1824.7	3081.3	2272	6878.8	8359.2	2885.1	10309.7	7841.6	6721.3	739.5	540.5	318.3	336.9	200.9	948.1	463.4	726.3	597.9	1344.1	1046.5	1824.7
FALSE	High	Master Protein	P51910	Apolipoprotein D OS=Mus musculus OX=10090 GN=Apod PE=1 SV=1	0	36.482	37	6	15	6	6	189	21.5	4.91	47.25	6	0	52	65.7	92.4	59.5	83.4	94.2	2132.2	1196.3	1016	863	280	97.8	177.4	146.1	582.6	1016.1	190.2	4099.6	3170.9	939.1	33	21.9	18.2	13.7	12.6	37	303.3	218.7	185.1	275.7	135	97.8
FALSE	High	Master Protein	Q91Z53	Glyoxylate reductase/hydroxypyruvate reductase OS=Mus musculus OX=10090 GN=Grhpr PE=1 SV=1	0	36.467	32	10	16	10	10	328	35.3	7.65	42.44	10	0	1183.8	1009.7	772.4	1022.1	657.1	495.9	335.3	299.2	370.5	1078.4	741.4	1558	1576.3	1386.2	1039.9	520.4	1091.7	437.6	713.6	606.1	750.6	336.7	152.1	235.3	99.3	194.8	47.7	54.7	67.5	344.5	357.5	1558
FALSE	High	Master Protein	P54227	Stathmin OS=Mus musculus OX=10090 GN=Stmn1 PE=1 SV=2	0	36.44	51	8	17	5	8	149	17.3	5.97	52.42	8	0	984.1	677.1	495.1	2334.7	733.2	563.6	584.9	467.2	411.1	1723.2	1031.8	2737.9	1545.5	1256.4	2545.1	1107.3	2083.9	1065.6	1134.3	950.7	624	225.8	97.5	537.5	110.8	221.4	83.2	85.4	74.9	550.5	497.5	2737.9
FALSE	High	Master Protein	Q9CZ13	Cytochrome b-c1 complex subunit 1, mitochondrial OS=Mus musculus OX=10090 GN=Uqcrc1 PE=1 SV=2	0	36.386	20	10	14	9	9	480	52.8	6.21	40.74	10	1	1021.6	1028	1518.8	354.4	1136.8	512.4	380.3	348.5	436.9	651.4	748.9	1302.8	1100.3	995.2	173	246.7	1287.9	183.5	230.6	180	647.8	342.8	299.1	81.6	171.8	201.3	54.1	63.7	79.6	208.1	361.1	1302.8
FALSE	High	Master Protein	P45591	Cofilin-2 OS=Mus musculus OX=10090 GN=Cfl2 PE=1 SV=1	0	36.306	53	8	21	6	6	166	18.7	7.88	64.91	8	0	1818.1	1914.4	1182.2	1818.3	886.7	472.5	578.6	490.1	503.3	1110.3	1136.7	1578.3	1594.8	1123.3	1380.8	289.8	1198.2	472.9	547.2	372.7	1152.8	638.4	232.8	418.6	134	185.6	82.3	89.6	91.7	354.7	548.1	1578.3
FALSE	High	Master Protein	P29533	Vascular cell adhesion protein 1 OS=Mus musculus OX=10090 GN=Vcam1 PE=1 SV=1	0	36.288	17	13	20	13	13	739	81.3	5.3	51.83	13	0	1273.8	1601.3	2354.2	2170.5	2430.4	5336.1	4414.9	4561.6	3993.7	1149.1	2759.7	497.5	842.3	712.7	1102.1	2075.9	925.6	1809	1634	1710.3	807.7	534	463.6	499.7	367.3	2096.2	628	833.9	727.6	367.1	1330.7	497.5
FALSE	High	Master Protein	P08905	Lysozyme C-2 OS=Mus musculus OX=10090 GN=Lyz2 PE=1 SV=2	0	36.278	43	5	90	2	2	148	16.7	8.81	339.01	5	0	1189.1	678.9	798.8	543.4	858.2	879	168	136.8	220.7	670.8	494.6	793.5	768.3	985.4	492.4	568.6	1272.1	261	325	244.4	754	226.4	157.3	125.1	129.7	345.3	23.9	25	40.2	214.3	238.5	793.5
FALSE	High	Master Protein	Q9JI75	Ribosyldihydronicotinamide dehydrogenase [quinone] OS=Mus musculus OX=10090 GN=Nqo2 PE=1 SV=3	0	36.26	45	9	17	9	9	231	26.2	7.01	54.84	9	0	2987.1	2816.7	2362.8	2207	2935.3	1103	801.4	681.6	839.3	1498.2	1986.4	1281.9	1796.5	2045.9	645.8	431.4	1073	404.9	696.1	1382.8	1894.1	939.3	465.3	508.1	443.6	433.3	114	124.6	152.9	478.6	957.8	1281.9
FALSE	High	Master Protein	O54782	Epididymis-specific alpha-mannosidase OS=Mus musculus OX=10090 GN=Man2b2 PE=1 SV=2	0	36.189	10	9	15	9	9	1018	115.5	7.39	44.69	9	0	370.3	374.8	445.3	408.7	588.9	478.3	506.2	565.6	509.4	982	439.9	1365.1	1428.4	1587.1	859	1162.8	1601.8	551.3	729.6	528.2	234.8	125	87.7	94.1	89	187.9	72	103.4	92.8	313.7	212.1	1365.1
FALSE	High	Master Protein	P16056	Hepatocyte growth factor receptor OS=Mus musculus OX=10090 GN=Met PE=1 SV=1	0	36.067	8	11	18	11	11	1379	153.5	7.05	50.05	11	0	2257.7	2263.1	2805.1	659.8	2256.4	1070.7	464	439.8	637.8	1595.8	1497.3	2497.5	3043	3077	620.5	773	2912.5	710.7	652.1	661.5	1431.6	754.7	552.4	151.9	341	420.6	66	80.4	116.2	509.8	722	2497.5
FALSE	High	Master Protein	P09671	Superoxide dismutase [Mn], mitochondrial OS=Mus musculus OX=10090 GN=Sod2 PE=1 SV=3	0	36.062	33	7	23	7	7	222	24.6	8.62	69.82	7	0	3429.7	3686.6	2723.8	583.4	1989.1	651.4	668.6	475.9	667.4	2169.6	1806.8	3107.3	3033.3	2566.7	851.5	649.6	3233.7	833	1425	719	2174.7	1229.4	536.4	134.3	300.6	255.9	95.1	87	121.6	693.1	871.2	3107.3
FALSE	High	Master Protein	P29416	Beta-hexosaminidase subunit alpha OS=Mus musculus OX=10090 GN=Hexa PE=1 SV=2	0	36.055	22	10	18	10	10	528	60.6	6.54	49.93	10	0	1401.9	1264	1172.5	2333.9	1807.8	1316.9	810.6	686.5	784.9	971.3	1335.4	1351.9	924.2	982.9	1073.6	1081.8	1349.1	537.5	461.3	455.4	888.9	421.5	230.9	537.3	273.2	517.3	115.3	125.5	143	310.3	643.9	1351.9
FALSE	High	Master Protein	Q68FL4	Putative adenosylhomocysteinase 3 OS=Mus musculus OX=10090 GN=Ahcyl2 PE=1 SV=1	0	35.991	14	11	18	4	4	613	66.9	7.36	46.56	11	7	2180.5	2044.2	1891.6	1448.2	1375	828.9	805.6	756.5	759.7	1709.5	1612.2	2555.2	1941.8	1833.6	1798.4	776.6	2154.9	923.5	1035.8	1047.5	1382.6	681.7	372.5	333.4	207.8	325.6	114.6	138.3	138.4	546.1	777.4	2555.2
FALSE	High	Master Protein	Q99K30	Epidermal growth factor receptor kinase substrate 8-like protein 2 OS=Mus musculus OX=10090 GN=Eps8l2 PE=1 SV=1	0	35.981	17	12	17	12	12	729	82.2	7.18	38.57	12	0	1090.4	1352.4	1098.4	1670.1	1080.6	796.8	819	694.2	652.6	572.9	976	790.8	774.9	852.3	820.2	344.5	765.9	461.7	738.7	313	691.4	451	216.3	384.5	163.3	313	116.5	126.9	118.9	183	470.6	790.8
FALSE	High	Master Protein	Q99LI8	Hepatocyte growth factor-regulated tyrosine kinase substrate OS=Mus musculus OX=10090 GN=Hgs PE=1 SV=2	0	35.931	16	14	20	14	14	775	86	6.16	41.1	14	0	1828.9	1762.6	1556.9	1704	1474.3	811	906.9	792.1	778.9	2052.9	1425.4	2843.9	2235	2250	2936.5	959.1	2678.5	1282.7	3474.2	1174.2	1159.7	587.8	306.6	392.3	222.8	318.6	129	144.8	141.9	655.8	687.3	2843.9
FALSE	High	Master Protein	Q9R1T2	SUMO-activating enzyme subunit 1 OS=Mus musculus OX=10090 GN=Sae1 PE=1 SV=1	0	35.92	26	10	18	10	10	350	38.6	5.36	47.78	10	0	847.7	678.6	717	374.4	706	346.5	310	353.4	340.3	1958.6	577	2050.2	1948.4	2264.7	880	1435	1985.9	1171.6	1495.6	2182	537.5	226.3	141.2	86.2	106.7	136.1	44.1	64.6	62	625.7	278.2	2050.2
FALSE	High	Master Protein	Q9R0Q7	Prostaglandin E synthase 3 OS=Mus musculus OX=10090 GN=Ptges3 PE=1 SV=1	0	35.888	42	7	17	7	7	160	18.7	4.55	48.93	7	0	4147.1	3489	3276.8	3255.2	3099.4	999.4	938.5	756	1033.6	2530.6	2566.8	4249.1	3301.4	3223.9	2378.2	761.3	3474.2	922.6	805.8	869.8	2629.6	1163.5	645.3	749.4	468.4	392.6	133.5	138.2	188.3	808.4	1237.7	4249.1
FALSE	High	Master Protein	O55222	Integrin-linked protein kinase OS=Mus musculus OX=10090 GN=Ilk PE=1 SV=2	0	35.845	27	13	18	13	13	452	51.3	8.07	43.31	13	0	1269.5	1045.1	756.6	1836.9	837.1	591.6	655.2	702.4	694.9	1264.3	959.4	1012.2	1112.2	951.9	2901	569.3	963.2	1071.6	1299.2	1208.9	805	348.5	149	422.9	126.5	232.4	93.2	128.4	126.6	403.9	462.6	1012.2
FALSE	High	Master Protein	Q8BHG2	CXXC motif containing zinc binding protein OS=Mus musculus OX=10090 GN=Czib PE=1 SV=1	0	35.828	55	8	16	8	8	160	18	5.12	48.98	8	0	1068.8	991.4	750.5	1370	476.4	283.6	312.1	245.6	330.4	1331.6	760.3	2265.2	2134.2	1311.1	1487	375.9	1329.9	438.5	475.2	355.4	677.7	330.6	147.8	315.4	72	111.4	44.4	44.9	60.2	425.4	366.6	2265.2
FALSE	High	Master Protein	P63158	High mobility group protein B1 OS=Mus musculus OX=10090 GN=Hmgb1 PE=1 SV=2	0	35.815	42	7	14	6	6	215	24.9	5.74	45.51	7	1	2154.9	1408.8	1537.1	964.7	1215.5	551.1	573.7	501.1	522	795.1	1141.7	1214	1021.1	1062.9	462.5	366.4	910	312.7	189.4	244.8	1366.4	469.8	302.7	222.1	183.7	216.5	81.6	91.6	95.1	254	550.5	1214
FALSE	High	Master Protein	P97426	Eosinophil cationic protein 1 OS=Mus musculus OX=10090 GN=Ear1 PE=2 SV=1	0	35.762	39	5	23	3	4	155	17.3	8.95	75.43	5	2	944	835.7	1255.8	593.3	944.9	352.1	371.2	439.3	541.8	220.7	636.9	291	311.7	340.4	170.7	155.5	295.2	156.8	106.9	76.6	598.6	278.7	247.3	136.6	142.8	138.3	52.8	80.3	98.7	70.5	307.1	291
FALSE	High	Master Protein	Q9D8B3	Charged multivesicular body protein 4b OS=Mus musculus OX=10090 GN=Chmp4b PE=1 SV=2	0	35.738	36	9	23	8	9	224	24.9	4.82	79.5	9	0	4017.3	2939.3	2899	4411.9	2577.3	1826.7	1698.5	1508.1	1507.8	3093.4	2976.4	4984.7	4340.6	2890	2587.2	1046.7	4094.7	1345.6	1457.9	1343.8	2547.3	980.2	570.9	1015.7	389.5	717.6	241.6	275.7	274.7	988.2	1435.2	4984.7
FALSE	High	Master Protein	Q9QZD9	Eukaryotic translation initiation factor 3 subunit I OS=Mus musculus OX=10090 GN=Eif3i PE=1 SV=1	0	35.731	27	8	13	8	8	325	36.4	5.64	39.86	8	0	1218.9	1103.5	1070.4	940	876.8	505.8	688.2	647.1	595	547.5	851.1	648.2	557	625.4	578.4	260.6	595.6	316.1	420.7	610.9	772.9	368	210.8	216.4	132.5	198.7	97.9	118.3	108.4	174.9	410.4	648.2
FALSE	High	Master Protein	P42125	Enoyl-CoA delta isomerase 1, mitochondrial OS=Mus musculus OX=10090 GN=Eci1 PE=1 SV=2	0	35.704	30	8	18	8	8	289	32.2	8.98	51.91	8	0	1180.3	1004.6	1034.9	589.4	928.4	433.8	408.4	360.5	456.7	796	704.3	1235.1	1136	1192.7	582.2	625.6	1209.9	654.7	489.9	442.5	748.4	335	203.8	135.7	140.3	170.4	58.1	65.9	83.2	254.3	339.6	1235.1
FALSE	High	Master Protein	O08528	Hexokinase-2 OS=Mus musculus OX=10090 GN=Hk2 PE=1 SV=1	0	35.701	11	10	15	6	7	917	102.5	6.11	43.21	10	1	411	437.5	392	277.6	274.6	210	187.7	157.5	193.2	658.6	317.1	935	636.2	652.3	502.7	301.5	719.8	384.2	569.6	557.4	260.6	145.9	77.2	63.9	41.5	82.5	26.7	28.8	35.2	210.4	152.9	935
FALSE	High	Master Protein	Q8R5H1	Ubiquitin carboxyl-terminal hydrolase 15 OS=Mus musculus OX=10090 GN=Usp15 PE=1 SV=1	0	35.695	10	11	17	11	11	981	112.3	5.17	43.63	11	0	1050.6	1048.4	1123.8	914.8	835.7	451.3	373.3	479.7	665.3	830.5	788.7	938.9	774.1	1035.2	856.6	516.8	753.5	469.5	622.7	593.7	666.2	349.6	221.3	210.6	126.3	177.3	53.1	87.7	121.2	265.3	380.3	938.9
FALSE	High	Master Protein	Q99K41	EMILIN-1 OS=Mus musculus OX=10090 GN=Emilin1 PE=1 SV=1	0	35.641	11	12	19	11	12	1017	107.5	5.3	48.63	12	0	1589.7	1667	1799.1	1747.9	1989.7	2520.4	3612.7	3733.4	3960.2	826.4	2101.2	662.5	674.1	567.4	1447.2	1445.3	759.9	1789.2	1297.8	991.3	1008	555.9	354.3	402.4	300.7	990.1	513.9	682.5	721.5	264	1013.2	662.5
FALSE	High	Master Protein	Q9WUA2	Phenylalanine--tRNA ligase beta subunit OS=Mus musculus OX=10090 GN=Farsb PE=1 SV=2	0	35.623	17	10	21	10	10	589	65.7	7.12	56.76	10	0	1952.1	1579.7	1673.2	989.9	1484.2	785.1	812.7	704	750.3	393.2	1293.9	527	457.9	727.4	421.8	281.8	479	301.5	315.2	223.7	1237.8	526.8	329.5	227.9	224.3	308.4	115.6	128.7	136.7	125.6	623.9	527
FALSE	High	Master Protein	P97501	Dimethylaniline monooxygenase [N-oxide-forming] 3 OS=Mus musculus OX=10090 GN=Fmo3 PE=1 SV=1	0	35.594	21	11	19	10	11	534	60.5	8.37	50.68	11	0	2594.8	2194.5	2548.7	866.6	1384.9	603.8	474.5	351.2	649.9	1134.4	1119.3	1551.1	1442.9	1356.8	861.8	1229.2	1326.3	675.4	443.1	287.9	1645.3	731.8	501.9	199.5	209.3	237.2	67.5	64.2	118.4	362.4	539.7	1551.1
FALSE	High	Master Protein	Q9Z1Z0	General vesicular transport factor p115 OS=Mus musculus OX=10090 GN=Uso1 PE=1 SV=2	0	35.577	10	11	17	11	11	959	106.9	4.93	46.58	11	0	1656.9	1511.7	1556.4	1715.8	1580.8	1249.1	1034.8	993.4	1039.6	1424.6	1437.6	1474.8	1252.2	1379.7	1327	816.1	1512.1	893.3	919.7	1123.9	1050.6	504.1	306.5	395	238.9	490.7	147.2	181.6	189.4	455.1	693.2	1474.8
FALSE	High	Master Protein	P70268	Serine/threonine-protein kinase N1 OS=Mus musculus OX=10090 GN=Pkn1 PE=1 SV=3	0	35.503	13	14	18	13	13	946	104.3	6.27	40.16	14	1	1053.3	930.2	880	1540.3	1000.5	581.2	534.3	585.3	642.7	1132.2	887.2	1315	1091.1	1025.4	1289.6	630.7	1232.5	840.8	1024.6	683	667.9	310.2	173.3	354.6	151.2	228.3	76	107	117.1	361.7	427.8	1315
FALSE	High	Master Protein	P35979	60S ribosomal protein L12 OS=Mus musculus OX=10090 GN=Rpl12 PE=1 SV=2	0	35.463	64	8	13	8	8	165	17.8	9.42	38.62	8	0	1678.2	1275.4	1285.2	1183.7	1220.8	594.9	716.4	629.1	640	764.7	1178.4	1244.9	795.2	929	811.3	405.1	907.2	815.8	467.6	601.6	1064.1	425.3	253.1	272.5	184.5	233.7	101.9	115	116.6	244.3	568.2	1244.9
FALSE	High	Master Protein	Q9Z204	Heterogeneous nuclear ribonucleoproteins C1/C2 OS=Mus musculus OX=10090 GN=Hnrnpc PE=1 SV=1	0	35.456	24	10	19	10	10	313	34.4	5.05	57.05	10	0	4134.3	2759.1	2913.3	2345.2	2777.8	1711.4	2047.1	1755.4	1437.5	1799.6	2609.3	2475.9	1430.6	1956.1	1319.6	1054.7	2067	815.8	907.2	1366.9	2621.5	920.1	573.7	539.9	419.8	672.3	291.2	320.9	261.9	574.9	1258.2	2475.9
FALSE	High	Master Protein	B2RXS4	Plexin-B2 OS=Mus musculus OX=10090 GN=Plxnb2 PE=1 SV=1	0	35.437	6	11	18	11	11	1842	206.1	5.87	44	11	0	714.1	750.3	1344.7	525.6	1072	739.2	574.4	425	525.8	631.4	693.5	689	809.7	1033.5	469.5	551.8	850.9	484.1	533.3	356.1	452.8	250.2	264.8	121	162	290.4	81.7	77.7	95.8	201.7	334.4	689
FALSE	High	Master Protein	Q91W50	Cold shock domain-containing protein E1 OS=Mus musculus OX=10090 GN=Csde1 PE=1 SV=1	0	35.364	13	13	22	13	13	798	88.7	6.37	51.59	13	0	2173.1	1783.9	1778.8	2309.5	1702.6	1031.7	820.4	794.3	834.3	1139.8	1513.3	1421.3	1062.9	1142.1	1290.6	691.2	1183.7	808.9	1243.3	881.3	1377.9	594.9	350.3	531.7	257.3	405.3	116.7	145.2	152	364.1	729.7	1421.3
FALSE	High	Master Protein	O08795	Glucosidase 2 subunit beta OS=Mus musculus OX=10090 GN=Prkcsh PE=1 SV=1	0	35.339	20	10	21	10	10	521	58.8	4.46	60.7	10	0	1766.6	1422.3	1633.6	982.1	1709.8	867.8	763.5	681	938.6	1903.9	1371	2698.1	2285.6	2493.2	1212	1090.5	3006.4	1035.4	1276.9	1355.3	1120.2	474.3	321.7	226.1	258.4	340.9	108.6	124.5	171	608.2	661.1	2698.1
FALSE	High	Master Protein	P97355	Spermine synthase OS=Mus musculus OX=10090 GN=Sms PE=1 SV=1	0	35.332	28	11	19	11	11	366	41.3	5.06	50.49	11	0	3644.3	3670.4	3292.6	2682.2	2376.8	2060.2	1473.5	1660.8	2778.5	2791.9	2894.9	4283.4	3594.3	3174.1	2495.6	2078.1	2970.6	1620.4	1096.6	1592.4	2310.8	1224	648.4	617.5	359.2	809.3	209.6	303.6	506.2	891.9	1395.9	4283.4
FALSE	High	Master Protein	Q9CZ42	ATP-dependent (S)-NAD(P)H-hydrate dehydratase OS=Mus musculus OX=10090 GN=Naxd PE=1 SV=1	0	35.321	22	7	18	7	7	343	36.7	7.77	60.22	7	0	4177.7	4017.7	2856.4	2432.9	1908.4	925.3	759.9	657.5	860.1	872.1	2577.4	1587.7	1121.9	853.9	651.4	311	1178	283.4	397	321.9	2649	1339.8	562.5	560.1	288.4	363.5	108.1	120.2	156.7	278.6	1242.8	1587.7
FALSE	High	Master Protein	P50518	V-type proton ATPase subunit E 1 OS=Mus musculus OX=10090 GN=Atp6v1e1 PE=1 SV=2	0	35.297	33	10	23	7	10	226	26.1	8.43	59.32	10	0	3680.9	3317.2	2525.3	3625.2	2726.2	1883.5	1688.6	1650.4	1734.5	2021.9	3094.6	3156.8	2028.1	2018.9	2367.5	1365.7	2578.2	1333.5	1511	1237	2334	1106.2	497.3	834.6	412	739.9	240.2	301.7	316	645.9	1492.2	3156.8
FALSE	High	Master Protein	P28862	Stromelysin-1 OS=Mus musculus OX=10090 GN=Mmp3 PE=2 SV=2	0	35.252	20	11	18	7	11	477	53.8	6.13	54.54	11	0	951.6	872.3	1222.3	1231	1170.6	2622	8912	5437.9	5680.5	3339.1	2580.1	790.1	1179.6	1096.4	1936.3	2667.9	892.7	5649.3	11693.2	7860.9	603.4	290.9	240.7	283.4	176.9	1030	1267.7	994.1	1034.9	1066.7	1244.1	790.1
FALSE	High	Master Protein	Q9Z0L8	Gamma-glutamyl hydrolase OS=Mus musculus OX=10090 GN=Ggh PE=1 SV=2	0	35.225	22	6	20	6	6	317	35.4	7.5	67.03	6	0	2203.3	2823.3	3046.3	1390	3248.3	2490.1	1944.5	1956.1	2060.5	927.2	2224.8	967.6	1409.9	1577.3	602.3	1017.5	1227.3	815.8	756.9	573.7	1397.1	941.5	599.9	320	490.9	978.2	276.6	357.6	375.4	296.2	1072.8	967.6
FALSE	High	Master Protein	Q99J77	Sialic acid synthase OS=Mus musculus OX=10090 GN=Nans PE=1 SV=1	0	35.212	27	10	19	10	10	359	40	7.06	52.71	10	0	1768.5	1662.2	1863.1	966	1279.7	477.8	525.1	513.1	503.3	1751.4	1180.7	2482.4	2604	2589.6	1393	1013.9	2070.7	985.5	690.5	684.6	1121.4	554.3	366.9	222.4	193.4	187.7	74.7	93.8	91.7	559.5	569.3	2482.4
FALSE	High	Master Protein	Q8R059	UDP-glucose 4-epimerase OS=Mus musculus OX=10090 GN=Gale PE=1 SV=1	0	35.158	30	10	19	10	10	347	38.2	6.74	49.91	10	0	2612.3	2024.1	2082.5	2477.6	2143.9	996.1	741.7	862.7	995.7	1249.6	1666.4	1800.3	1534.9	1614.8	2350.6	647.4	1505.9	719.3	1007.8	488	1656.4	675	410.1	570.4	324	391.3	105.5	157.7	181.4	399.2	803.5	1800.3
FALSE	High	Master Protein	P10810	Monocyte differentiation antigen CD14 OS=Mus musculus OX=10090 GN=Cd14 PE=1 SV=1	0	35.103	27	8	16	8	8	366	39.2	5.21	53.71	8	0	1513	1661.9	1382.2	1573.7	2063.9	1744.3	1739.9	1320.5	1671.4	1179.2	1716.5	1212.8	1370.2	1341.3	910.9	968.6	1400.1	1051.8	1016.9	1043	959.4	554.2	272.2	362.3	311.9	685.2	247.5	241.4	304.5	376.7	827.7	1212.8
FALSE	High	Master Protein	P16294	Coagulation factor IX OS=Mus musculus OX=10090 GN=F9 PE=2 SV=3	0	35.099	17	9	17	8	8	471	52.9	5.44	45.31	9	0	352	470.2	472.8	1088.1	473.8	1396.5	2044.3	1688.7	1626.9	1150.4	1130.1	343.7	1021.5	476	1209.7	1509.5	717.7	2282.8	2373.4	2590.5	223.2	156.8	93.1	250.5	71.6	548.6	290.8	308.7	296.4	367.5	544.9	343.7
FALSE	High	Master Protein	P48774	Glutathione S-transferase Mu 5 OS=Mus musculus OX=10090 GN=Gstm5 PE=1 SV=1	0	35.098	46	11	20	9	9	224	26.6	7.21	51.63	11	0	3093	3060.8	2191.7	2550.2	1485.5	713.8	539.2	541.6	606.5	952.9	1983	1425.7	915.8	923.3	997.9	367.9	1230.4	401.4	379.5	313	1961.2	1020.7	431.6	587.1	224.5	280.4	76.7	99	110.5	304.4	956.2	1425.7
FALSE	High	Master Protein	P62960	Y-box-binding protein 1 OS=Mus musculus OX=10090 GN=Ybx1 PE=1 SV=3	0	35.03	33	7	15	4	7	322	35.7	9.88	47.37	7	0	632.9	627	643.4	468.2	498.9	312.3	390.2	409.7	369.4	607.3	458.3	648	878	1076	240.8	378.1	539.9	349.7	364.1	336.4	401.3	209.1	126.7	107.8	75.4	122.7	55.5	74.9	67.3	194	221	648
FALSE	High	Master Protein	P17897	Lysozyme C-1 OS=Mus musculus OX=10090 GN=Lyz1 PE=1 SV=1	0	34.99	55	7	49	4	4	148	16.8	9.41	135.79	7	3	9903.4	7343.6	9682.8	5715	10083	3158.4	2875.3	2133.9	2681.3	4795.7	5344.6	6446.2	7173.1	9388.5	3334	4020.5	7119.2	2380.2	2310.5	1506.3	6279.6	2448.9	1906.8	1315.7	1523.8	1240.7	409	390.1	488.5	1532	2577.1	6446.2
FALSE	High	Master Protein	Q8VDQ1	Prostaglandin reductase 2 OS=Mus musculus OX=10090 GN=Ptgr2 PE=1 SV=2	0	34.919	27	9	17	9	9	351	38	5.41	55.52	9	0	2364.4	2385.2	1505.6	2918.1	1103.7	1493.8	903.4	1030	858.5	2797.3	1875.2	3832.3	4710.9	2773.3	2474.5	943.1	2772.3	1249.9	3325.3	1365.8	1499.2	795.4	296.5	671.8	166.8	586.8	128.5	188.3	156.4	893.6	904.2	3832.3
FALSE	High	Master Protein	Q9DAR7	m7GpppX diphosphatase OS=Mus musculus OX=10090 GN=Dcps PE=1 SV=1	0	34.832	33	10	17	10	10	338	39	6.48	46.57	10	0	1237.2	1094.2	1085.2	300.6	1018.4	535.9	419.7	466.1	480.8	801.7	804.5	1137.7	1074.8	1263.8	337.6	419	927.4	435	519.3	646.3	784.5	364.9	213.7	69.2	153.9	210.5	59.7	85.2	87.6	256.1	387.9	1137.7
FALSE	High	Master Protein	Q9D819	Inorganic pyrophosphatase OS=Mus musculus OX=10090 GN=Ppa1 PE=1 SV=1	0	34.786	37	11	18	11	11	289	32.6	5.6	56.11	11	0	4607.3	3783.2	3734.9	4657.3	2928.7	1481.8	1706.2	1341.3	1351.4	3134.1	2903.4	4719	3749.7	4083.6	3812.8	1265	2939.7	2010.6	1993.9	1912.5	2921.4	1261.6	735.5	1072.2	442.6	582.1	242.7	245.2	246.2	1001.2	1400	4719
FALSE	High	Master Protein	Q05816	Fatty acid-binding protein 5 OS=Mus musculus OX=10090 GN=Fabp5 PE=1 SV=3	0	34.737	55	6	17	6	6	135	15.1	6.54	57.14	6	0	772.8	808.2	532.7	1193.2	1182.5	879.8	549	470.4	680.6	523.1	879.3	667.6	424	534.7	416.6	361.3	582.1	299.8	634.6	289.5	490	269.5	104.9	274.7	178.7	345.6	78.1	86	124	167.1	424	667.6
FALSE	High	Master Protein	P03953	Complement factor D OS=Mus musculus OX=10090 GN=Cfd PE=1 SV=1	0	34.723	23	4	14	4	4	259	28	6.67	53.87	4	0	828.1	1034.6	1624.5	1671.5	1795.9	3502.8	1342.7	1428.8	1839.9	193.5	1471.2	113.4	236.4	204.1	196.9	316.8	177.5	248.1	258.6	184.1	525.1	345	319.9	384.8	271.4	1376	191	261.2	335.2	61.8	709.4	113.4
FALSE	High	Master Protein	Q8BGD9	Eukaryotic translation initiation factor 4B OS=Mus musculus OX=10090 GN=Eif4b PE=1 SV=1	0	34.685	19	12	19	12	12	611	68.8	5.67	44.26	12	0	1263.4	1088.5	1037.4	1434.7	1058.1	491.6	769.8	606.6	644.9	1058.4	999	1488.2	1224.5	1177.2	1949.4	641.6	1282	1102.6	685.6	544.3	801.1	363	204.3	330.3	159.9	193.1	109.5	110.9	117.5	338.1	481.7	1488.2
FALSE	High	Master Protein	Q8R242	Di-N-acetylchitobiase OS=Mus musculus OX=10090 GN=Ctbs PE=1 SV=2	0	34.56	28	9	18	9	9	366	41.3	5.6	55.3	9	0	803.8	893.6	1176.6	843.5	1602	1317.9	999	1120.8	955.1	1042.1	1001.5	1110.8	1307.7	1389.5	672.9	1049.6	1466	845.1	1042.7	923.5	509.7	298	231.7	194.2	242.1	517.7	142.1	204.9	174	332.9	482.9	1110.8
FALSE	High	Master Protein	Q62059	Versican core protein OS=Mus musculus OX=10090 GN=Vcan PE=1 SV=2	0	34.535	3	11	19	11	11	3357	366.6	4.64	49.76	11	0	249	272.3	320.9	308.4	475.8	654.5	3609.9	3277.7	2060.5	952.9	1222.8	197.4	273.4	382.9	485.4	618.3	309.2	2811.7	2364.4	2542.7	157.9	90.8	63.2	71	71.9	257.1	513.5	599.2	375.4	304.4	589.6	197.4
FALSE	High	Master Protein	Q9R1P1	Proteasome subunit beta type-3 OS=Mus musculus OX=10090 GN=Psmb3 PE=1 SV=1	0	34.444	42	7	13	7	7	205	22.9	6.55	53.2	7	0	1746	1878.1	1566.6	1241.9	1567.6	1233.4	1051.7	973.7	1106.6	2660.8	1567.8	3291.2	2320.4	2213.2	2051.8	1413.1	2838.4	1450.7	1584.4	2942.3	1107.1	626.3	308.5	285.9	236.9	484.5	149.6	178	201.6	850	756	3291.2
FALSE	High	Master Protein	Q9JLV5	Cullin-3 OS=Mus musculus OX=10090 GN=Cul3 PE=1 SV=1	0	34.435	13	12	13	11	11	768	88.9	8.46	30.82	12	1	1510.4	1276	1091.8	1198.9	1076.6	645.1	691.8	638.9	605.4	516.5	1052.7	740.3	482.6	652.3	729.5	301.5	571.8	373	397	355.2	957.7	425.5	215	276	162.7	253.4	98.4	116.8	110.3	165	507.6	740.3
FALSE	High	Master Protein	P39039	Mannose-binding protein A OS=Mus musculus OX=10090 GN=Mbl1 PE=1 SV=1	0	34.428	35	10	27	8	8	239	25.4	7.61	65.28	10	2	593.5	885.8	844	1730.1	1544.4	4358.6	4456.3	6236.6	3782.9	2037.8	2041.7	729.4	969.6	1068.7	4433.8	4543.8	1360.8	3618.9	2871.8	2086.1	376.3	295.4	166.2	398.3	233.4	1712.2	633.9	1140.1	689.2	651	984.5	729.4
FALSE	High	Master Protein	O08756	3-hydroxyacyl-CoA dehydrogenase type-2 OS=Mus musculus OX=10090 GN=Hsd17b10 PE=1 SV=4	0	34.408	31	6	12	6	6	261	27.4	8.41	39.57	6	0	484.8	509.8	458.5	224.6	549.2	302.7	284.7	234.7	272.2	456.1	327.5	698.9	535	807.4	307.2	474.5	515.5	261	310.3	285.2	307.4	170	90.3	51.7	83	118.9	40.5	42.9	49.6	145.7	157.9	698.9
FALSE	High	Master Protein	Q8JZM8	Mucin-4 OS=Mus musculus OX=10090 GN=Muc4 PE=2 SV=1	0	34.389	3	10	14	10	10	3443	364.9	7.43	38.07	10	0	605.8	677.1	611.4	740.6	1187.8	827.8	2378.3	1173.4	2157.7	454.2	871.2	321.5	421.4	454.7	273.1	453.3	413.1	382.5	464.1	645.8	384.1	225.8	120.4	170.5	179.5	325.2	338.3	214.5	393.1	145.1	420.1	321.5
FALSE	High	Master Protein	P98086	Complement C1q subcomponent subunit A OS=Mus musculus OX=10090 GN=C1qa PE=1 SV=2	0	34.335	30	8	16	8	8	245	26	9.11	49.12	8	0	558.3	602.7	673.9	1543.7	960.1	2917.3	3683.7	6182.4	3715.4	515.6	1645.8	126	147.5	193.5	830	977.4	126.2	2188.9	1218.2	720.6	354	201	132.7	355.4	145.1	1146	524	1130.2	676.9	164.7	793.6	126
FALSE	High	Master Protein	P10852	4F2 cell-surface antigen heavy chain OS=Mus musculus OX=10090 GN=Slc3a2 PE=1 SV=1	0	34.317	20	12	22	12	12	526	58.3	5.91	57.59	12	0	1737.5	2025.3	1833.2	1065.1	2304.1	1434.7	1423.6	1415.1	1693.9	2275.4	1608.9	2286.5	2567.4	2823.1	1350.4	2149.6	2650.2	1690.1	2054	2054	1101.7	675.4	361	245.2	348.2	563.6	202.5	258.7	308.6	726.9	775.8	2286.5
FALSE	High	Master Protein	P16301	Phosphatidylcholine-sterol acyltransferase OS=Mus musculus OX=10090 GN=Lcat PE=1 SV=2	0	34.276	23	8	13	8	8	438	49.7	6.43	36.68	8	0	309.4	346.4	326	424.8	480.4	901.4	1020.8	1053	752	405.7	592.1	261.4	292.8	303.7	563.5	581	425.1	690	716.4	646	196.2	115.5	64.2	97.8	72.6	354.1	145.2	192.5	137	129.6	285.5	261.4
FALSE	High	Master Protein	P22892	AP-1 complex subunit gamma-1 OS=Mus musculus OX=10090 GN=Ap1g1 PE=1 SV=3	0	34.207	14	14	22	13	13	822	91.3	6.8	53.5	14	1	2024.2	1840.3	1771.2	2326.5	1962	1429.1	1346.3	1352.8	1323.9	1297.8	1764.7	1541.3	1280.4	1332.3	2006.9	707.3	1405.1	894.2	879.2	1020.5	1283.5	613.7	348.8	535.6	296.5	561.4	191.5	247.3	241.2	414.6	850.9	1541.3
FALSE	High	Master Protein	Q6P1F6	Serine/threonine-protein phosphatase 2A 55 kDa regulatory subunit B alpha isoform OS=Mus musculus OX=10090 GN=Ppp2r2a PE=1 SV=1	0	34.19	19	8	20	4	6	447	51.7	6.2	58.17	8	2	1721.5	1827.4	1970.3	2011.1	1606.6	1158.5	1041.9	937	913.9	1962.7	1546.5	2552	1846.7	2184.7	3123.6	1224.8	2159.1	1430	1471.2	1563	1091.6	609.4	388	463	242.8	455.1	148.2	171.3	166.5	627	745.7	2552
FALSE	High	Master Protein	Q922D4	Serine/threonine-protein phosphatase 6 regulatory subunit 3 OS=Mus musculus OX=10090 GN=Ppp6r3 PE=1 SV=1	0	34.166	11	10	12	10	10	844	94.6	4.58	36.14	10	0	521.5	484.3	389	574.2	592.9	337.5	319.9	282.8	287.6	931.6	445.3	1229.2	911.9	978	1002.1	437.2	1108	526.3	784.2	892.7	330.7	161.5	76.6	132.2	89.6	132.6	45.5	51.7	52.4	297.6	214.7	1229.2
FALSE	High	Master Protein	P35831	Tyrosine-protein phosphatase non-receptor type 12 OS=Mus musculus OX=10090 GN=Ptpn12 PE=1 SV=3	0	34.12	12	9	14	9	9	775	86.5	5.99	39.43	9	0	1863	1429.5	1425.9	1846.5	1576.2	1011.6	1001.8	823.8	1029.7	673	1534.2	1321.1	701.9	997.6	582.6	386.9	1245.7	342	1060.2	316.9	1181.3	476.7	280.8	425.1	238.2	397.4	142.5	150.6	187.6	215	739.8	1321.1
FALSE	High	Master Protein	Q80SW1	S-adenosylhomocysteine hydrolase-like protein 1 OS=Mus musculus OX=10090 GN=Ahcyl1 PE=1 SV=1	0	34.101	15	10	17	3	3	530	58.9	6.89	44.63	10	0	693.6	690.9	558.6	705	596.2	591.3	494.2	372	400.1	649.2	600.8	908.8	580.8	533.1	970.3	375.9	823.4	397.1	382.3	664.4	439.8	230.4	110	162.3	90.1	232.3	70.3	68	72.9	207.4	289.7	908.8
FALSE	High	Master Protein	P28867	Protein kinase C delta type OS=Mus musculus OX=10090 GN=Prkcd PE=1 SV=3	0	34.085	15	12	19	11	12	674	77.5	7.39	51.39	12	0	3009.1	2612.8	1989.6	4103.5	1878.6	1651.9	1613.4	1456.7	1529.8	2296.7	2487	3868.5	2101.2	1915.2	3105.3	1118.3	2348	1138.8	1289.5	1535.8	1908	871.3	391.8	944.7	283.9	648.9	229.5	266.3	278.7	733.7	1199.2	3868.5
FALSE	High	Master Protein	Q8K4G1	Latent-transforming growth factor beta-binding protein 4 OS=Mus musculus OX=10090 GN=Ltbp4 PE=1 SV=2	0	34.085	7	10	17	10	10	1666	178.5	5.47	44.13	10	0	226	246.8	326	956	612.1	1364.5	956.8	799.7	1027	583.2	600.8	184.6	225.9	309.4	1024.5	1083.2	318.5	1906.4	1201.4	593.2	143.3	82.3	64.2	220.1	92.5	536	136.1	146.2	187.1	186.3	289.7	184.6
FALSE	High	Master Protein	P01843	Ig lambda-1 chain C region OS=Mus musculus OX=10090 PE=1 SV=1	0	34.053	65	4	18	4	4	105	11.6	6.27	68.29	4	0	179.6	349.1	281.3	553	206.5	432	565.9	914.1	468.8	580.1	413.5	299.1	344.8	651.5	934.7	1167.2	665.3	1339.5	773.7	653.1	113.9	116.4	55.4	127.3	31.2	169.7	80.5	167.1	85.4	185.3	199.4	299.1
FALSE	High	Master Protein	Q9D2G2	Dihydrolipoyllysine-residue succinyltransferase component of 2-oxoglutarate dehydrogenase complex, mitochondrial OS=Mus musculus OX=10090 GN=Dlst PE=1 SV=1	0	33.952	21	9	16	9	9	454	49	8.95	44.64	9	0	3390.6	2499.1	2556.8	1234.5	2023.5	1095.1	986.3	1048.1	941.9	983.2	1920.4	1833.3	1214.8	1005	446.6	302.9	1459.2	270.5	287.9	266.8	2149.9	833.4	503.5	284.2	305.8	430.2	140.3	191.6	171.6	314.1	926	1833.3
FALSE	High	Master Protein	O89023	Tripeptidyl-peptidase 1 OS=Mus musculus OX=10090 GN=Tpp1 PE=1 SV=2	0	33.95	17	8	18	8	8	562	61.3	6.57	58.99	8	0	2683.9	2550.1	2599.4	1845.2	3107.4	1791.9	1299.9	1326	1794.9	1954.3	2175.1	3192.4	2537.1	2414.1	1119.4	1473.7	3346.2	1232.7	824.7	824.7	1701.8	850.4	511.9	424.8	469.6	703.9	184.9	242.4	327	624.3	1048.8	3192.4
FALSE	High	Master Protein	Q91VC3	Eukaryotic initiation factor 4A-III OS=Mus musculus OX=10090 GN=Eif4a3 PE=1 SV=3	0	33.899	24	11	17	8	8	411	46.8	6.73	44.51	11	0	418.7	318.2	245.8	424.4	313.6	186.3	218.6	152.1	184.4	1262.5	296.4	1430.8	868.7	1032.7	924.4	705.1	1146.4	643.5	840.8	953	265.5	106.1	48.4	97.7	47.4	73.2	31.1	27.8	33.6	403.3	142.9	1430.8
FALSE	High	Master Protein	P28798	Progranulin OS=Mus musculus OX=10090 GN=Grn PE=1 SV=2	0	33.84	19	9	12	9	9	589	63.4	6.8	27.99	9	0	125.5	125.6	182.3	168.5	207.8	215.9	306.5	282.3	231.6	688	194.7	527.3	676.3	770.7	480.2	443.8	656.8	610.8	1416.7	1182.6	79.6	41.9	35.9	38.8	31.4	84.8	43.6	51.6	42.2	219.8	93.9	527.3
FALSE	High	Master Protein	P31532	Serum amyloid A-4 protein OS=Mus musculus OX=10090 GN=Saa4 PE=1 SV=2	0	33.832	61	8	16	8	8	130	15.1	9.26	46.65	8	0	232.6	283.4	425	351	496.3	2611.6	2327.6	3469.7	2221.9	642	2405.9	150.3	198.6	240.8	533.1	486.1	226.5	531.5	849.9	1810.7	147.5	94.5	83.7	80.8	75	1025.9	331.1	634.3	404.8	205.1	1160.1	150.3
FALSE	High	Master Protein	O08692	Neutrophilic granule protein OS=Mus musculus OX=10090 GN=Ngp PE=1 SV=1	0	33.747	57	9	20	9	9	167	19.3	5.31	54.46	9	0	152.8	210.8	305.2	317.5	450.6	208.7	5047.6	2530.5	816.7	2015.9	419.5	351.3	470.3	838.4	681.3	628.5	406.2	1552.3	1356.6	3424.7	96.9	70.3	60.1	73.1	68.1	82	718	462.6	148.8	644	202.3	351.3
FALSE	High	Master Protein	O88200	C-type lectin domain family 11 member A OS=Mus musculus OX=10090 GN=Clec11a PE=1 SV=1	0	33.743	34	11	19	11	11	328	36.4	5	52.17	11	0	543.1	632.1	1017.1	1619.8	1366.4	3668.2	2013.4	2353.8	2733.5	1932	1458.6	553	907	965	3286.3	4067.9	918.1	6539.2	3110.8	1853.8	344.4	210.8	200.3	372.9	206.5	1441	286.4	430.3	498	617.2	703.3	553
FALSE	High	Master Protein	Q9CX56	26S proteasome non-ATPase regulatory subunit 8 OS=Mus musculus OX=10090 GN=Psmd8 PE=1 SV=2	0	33.724	27	12	20	12	12	353	39.9	9.58	52.53	12	0	1532	1379.4	1359.4	998.6	1490.8	711.8	725.5	696.4	722.3	2334.3	1186.7	2723.5	2288.3	2417.3	2224.8	1407.3	2452.2	1461.9	2116.2	2126	971.4	460	267.7	229.9	225.3	279.6	103.2	127.3	131.6	745.7	572.2	2723.5
FALSE	High	Master Protein	Q99LD8	N(G),N(G)-dimethylarginine dimethylaminohydrolase 2 OS=Mus musculus OX=10090 GN=Ddah2 PE=1 SV=1	0	33.723	41	9	14	8	9	285	29.6	6.01	44.59	9	0	2292.1	2275.4	1894.6	1606.7	799.3	1166.4	786	799.7	845.3	1915.4	1973.9	2527.8	1701.4	1258.1	1151.2	1356.2	1873.9	964.8	1484.4	3352.2	1453.4	758.8	373.1	369.9	120.8	458.2	111.8	146.2	154	611.9	951.8	2527.8
FALSE	High	Master Protein	Q61171	Peroxiredoxin-2 OS=Mus musculus OX=10090 GN=Prdx2 PE=1 SV=3	0	33.698	39	7	23	7	7	198	21.8	5.41	75.57	7	0	7538.8	7133.3	5730.5	4749	4055.6	3847.7	2314.3	2330.3	1938.7	3544.5	5289	6045.5	4537	4372.6	3388.2	2369.4	4774.6	1256	1617.2	1716.9	4780.2	2378.8	1128.5	1093.3	612.9	1511.5	329.2	426	353.2	1132.3	2550.3	6045.5
FALSE	High	Master Protein	P46467	Vacuolar protein sorting-associated protein 4B OS=Mus musculus OX=10090 GN=Vps4b PE=1 SV=2	0	33.644	23	12	18	7	7	444	49.4	7.11	42.33	12	5	1458.3	1152.4	924.7	1195.4	857.6	510.4	478	471	520.3	938.2	1078.6	1485.1	939.2	759.2	930.1	339.4	1105.7	464.3	395.6	425.7	924.7	384.3	182.1	275.2	129.6	200.5	68	86.1	94.8	299.7	520.1	1485.1
FALSE	High	Master Protein	Q8VED5	Keratin, type II cytoskeletal 79 OS=Mus musculus OX=10090 GN=Krt79 PE=1 SV=2	0	33.568	8	8	24	1	1	531	57.5	7.69	62.22	8	0	881.9	3441.3	10723.2	1699.3	2199.5	2673.9	8725	16902.9	6866.1	1306	3110	431.3	681.6	2973.3	832.8	3858.4	716.9	2440.5	2287.5	396.5	559.2	1147.6	2111.7	391.2	332.4	1050.4	1241.1	3090	1250.9	417.2	1499.6	431.3
FALSE	High	Master Protein	P51859	Hepatoma-derived growth factor OS=Mus musculus OX=10090 GN=Hdgf PE=1 SV=2	0	33.551	41	9	19	8	8	237	26.3	4.83	51.32	9	1	2215.8	1378.8	1712.8	1297	1259.2	872.9	904.8	768	753.1	1479.7	1194.8	1913.7	1608.9	1940.6	1124.1	565	1769.8	573.7	680.7	861.8	1405	459.8	337.3	298.6	190.3	342.9	128.7	140.4	137.2	472.7	576.1	1913.7
FALSE	High	Master Protein	O35660	Glutathione S-transferase Mu 6 OS=Mus musculus OX=10090 GN=Gstm6 PE=1 SV=4	0	33.527	21	6	25	2	3	218	25.6	6.24	76.26	6	0	259.1	306.2	204.6	99.9	127.7	41.5	45.7	26.8	32.9	165.3	194.9	384.5	198.6	151	105.7	55.5	243.9	62	61.5	42.8	164.3	102.1	40.3	23	19.3	16.3	6.5	4.9	6	52.8	94	384.5
FALSE	High	Master Protein	P00688	Pancreatic alpha-amylase OS=Mus musculus OX=10090 GN=Amy2 PE=1 SV=2	0	33.434	17	9	21	3	3	508	57.3	7.28	62.98	9	0	397.1	437.8	632.2	456.1	681.6	1212.7	779.6	570	1128.5	658	578	456.6	624.4	965	672.4	1166.4	558.3	796	972.9	539.5	251.8	146	124.5	105	103	476.4	110.9	104.2	205.6	210.2	278.7	456.6
FALSE	High	Master Protein	P30275	Creatine kinase U-type, mitochondrial OS=Mus musculus OX=10090 GN=Ckmt1 PE=1 SV=1	0	33.363	21	8	15	7	8	418	47	8.16	42.04	8	0	3502.7	2444.6	3463.2	1697.9	2085	731.9	828.1	502.7	679	513.1	1459	630.2	797	849	368.5	372.3	567.6	309.3	306.8	165.9	2221	815.2	682	390.9	315.1	287.5	117.8	91.9	123.7	163.9	703.5	630.2
FALSE	High	Master Protein	P18653	Ribosomal protein S6 kinase alpha-1 OS=Mus musculus OX=10090 GN=Rps6ka1 PE=1 SV=1	0	33.359	14	11	14	4	4	724	81.5	8.1	37.41	11	0	190.7	173	151.8	112.9	151.5	69.8	64.7	70.6	90	184.1	126.1	252.3	228.1	199.2	186.1	51.8	195.7	68.9	83.2	64.8	120.9	57.7	29.9	26	22.9	27.4	9.2	12.9	16.4	58.8	60.8	252.3
FALSE	High	Master Protein	Q810U4	Neuronal cell adhesion molecule OS=Mus musculus OX=10090 GN=Nrcam PE=1 SV=2	0	33.345	9	11	17	11	11	1256	138.4	5.91	46	11	0	355.9	380.5	476.3	821	952.2	3012.5	852	1340.2	998.4	2493.6	1100	691.4	958.1	778.8	3512.1	3686.1	703.2	4627.6	4002.6	4257.3	225.7	126.9	93.8	189	143.9	1183.4	121.2	245	181.9	796.6	530.4	691.4
FALSE	High	Master Protein	P63242	Eukaryotic translation initiation factor 5A-1 OS=Mus musculus OX=10090 GN=Eif5a PE=1 SV=2	0	33.339	41	7	22	3	7	154	16.8	5.24	62.15	7	0	4564.9	4053.1	3346.4	3825.9	2003	1473.2	1299.9	1141.6	1281.7	3594.6	2847.8	5299.6	5895.8	4165.2	3038.9	1910.2	4563.6	1877.1	2712.4	1849.5	2894.5	1351.6	659	880.8	302.7	578.7	184.9	208.7	233.5	1148.3	1373.2	5299.6
FALSE	High	Master Protein	P30412	Peptidyl-prolyl cis-trans isomerase C OS=Mus musculus OX=10090 GN=Ppic PE=1 SV=1	0	33.292	38	8	17	7	7	212	22.8	7.5	41.48	8	0	624.4	679.8	1150.2	834.9	1549	1106.8	494.9	556.3	446.8	580.4	673.8	542.8	668.8	782.9	730.4	759.1	788.5	574.6	965.9	345.9	395.9	226.7	226.5	192.2	234.1	434.8	70.4	101.7	81.4	185.4	324.9	542.8
FALSE	High	Master Protein	Q9QYJ0	DnaJ homolog subfamily A member 2 OS=Mus musculus OX=10090 GN=Dnaja2 PE=1 SV=1	0	33.29	18	8	17	8	8	412	45.7	6.48	45.65	8	0	1205	1176.7	1300.5	935.2	1518.6	847.9	662.9	834.8	807.4	1506.9	1054.1	1867.6	2304.1	2526.7	1617.4	819	1529.2	1100.9	1406.9	909	764.1	392.4	256.1	215.3	229.5	333.1	94.3	152.6	147.1	481.4	508.3	1867.6
FALSE	High	Master Protein	Q9Z0N1	Eukaryotic translation initiation factor 2 subunit 3, X-linked OS=Mus musculus OX=10090 GN=Eif2s3x PE=1 SV=2	0	33.24	18	8	18	1	8	472	51	8.4	49.31	8	0	1380.4	1185.7	1249.7	1411.7	1117.6	747.4	826.7	799.7	769	1270.3	1125.1	1504.7	1480.3	1686.7	1165.7	826.3	1362	849.4	940	1305.9	875.3	395.4	246.1	325	168.9	293.6	117.6	146.2	140.1	405.8	542.5	1504.7
FALSE	High	Master Protein	O70251	Elongation factor 1-beta OS=Mus musculus OX=10090 GN=Eef1b PE=1 SV=5	0	33.138	34	7	17	7	7	225	24.7	4.69	50.42	7	0	3711.7	3037.7	2822.9	2434.2	2169.7	1684.7	1463.7	1479.7	1499	2176.2	2600.4	2841.7	1913.1	2105.5	2689.2	810.2	2214.8	978.6	1304.1	2303.3	2353.5	1013	555.9	560.4	327.9	661.8	208.2	270.5	273.1	695.2	1253.9	2841.7
FALSE	High	Master Protein	Q9ERG0	LIM domain and actin-binding protein 1 OS=Mus musculus OX=10090 GN=Lima1 PE=1 SV=3	0	33.136	15	14	21	14	14	753	84	6.6	50.63	14	0	1652	966.5	1003.9	1506.8	1318.8	476	538.5	497.2	505	2711.5	1281.9	5244.5	2543.7	2640.2	2405.3	1105.8	3780.3	1097.5	1078.4	1082.2	1047.5	322.3	197.7	346.9	199.3	187	76.6	90.9	92	866.2	618.1	5244.5
FALSE	High	Master Protein	Q8CC86	Nicotinate phosphoribosyltransferase OS=Mus musculus OX=10090 GN=Naprt PE=1 SV=1	0	33.109	18	9	15	9	9	538	58.2	6.46	42.4	9	0	1719.6	1674.2	1538.6	1274.9	1174.5	918.7	750.1	641.7	767.9	1216.1	1280.4	1731.8	1262.4	1279.3	1649.2	739.4	1329.4	709	840.8	717.4	1090.4	558.3	303	293.5	177.5	360.9	106.7	117.3	139.9	388.5	617.4	1731.8
FALSE	High	Master Protein	Q9Z2X1	Heterogeneous nuclear ribonucleoprotein F OS=Mus musculus OX=10090 GN=Hnrnpf PE=1 SV=3	0	33.053	24	8	15	6	6	415	45.7	5.49	46.58	8	2	888.1	634.2	658.6	321	646.5	380.6	293.9	253.8	289.8	1983.7	571.6	3141.7	2153.1	2536.5	765.5	881.8	2596.1	740.8	1260.8	1193	563.1	211.5	129.7	73.9	97.7	149.5	41.8	46.4	52.8	633.7	275.6	3141.7
FALSE	High	Master Protein	Q8BKX1	Brain-specific angiogenesis inhibitor 1-associated protein 2 OS=Mus musculus OX=10090 GN=Baiap2 PE=1 SV=2	0	32.979	18	11	18	11	11	535	59.2	9.04	46.24	11	0	1503.4	1320.6	1371.6	772.7	1554.3	771.1	1804.6	1121.9	1579.2	1058.7	1130.9	1279.5	1005.7	1240.1	688.3	498.5	1125.1	733.1	651.4	550.2	953.3	440.4	270.1	177.9	234.9	302.9	256.7	205.1	287.7	338.2	545.3	1279.5
FALSE	High	Master Protein	O70165	Ficolin-1 OS=Mus musculus OX=10090 GN=Fcn1 PE=1 SV=1	0	32.911	22	7	16	7	7	334	36.3	6.52	45.49	7	0	403.6	768	494.1	1242.3	830.4	4249.4	2927.3	3026.7	3120.4	2386.6	1895.7	525.1	728.7	747.8	5938	6263.5	1911.8	5477.9	3662.9	3039.1	255.9	256.1	97.3	286	125.5	1669.3	416.4	553.3	568.5	762.4	914.1	525.1
FALSE	High	Master Protein	P61759	Prefoldin subunit 3 OS=Mus musculus OX=10090 GN=Vbp1 PE=1 SV=2	0	32.86	51	12	22	12	12	196	22.4	6.28	53.23	12	0	2425.2	2136.9	2058.1	2096.3	2111.5	2227.7	1593	1560.6	1672.5	2267.3	2339.9	3255.5	2837.4	2601	2465.2	1121.9	2996.5	1198.3	1327.9	1463.2	1537.8	712.6	405.3	482.6	319.1	875.1	226.6	285.3	304.7	724.3	1128.3	3255.5
FALSE	High	Master Protein	Q62151	Advanced glycosylation end product-specific receptor OS=Mus musculus OX=10090 GN=Ager PE=1 SV=2	0	32.824	24	7	23	7	7	402	42.6	6.07	77.08	7	0	1378.2	1308.3	881.5	2462	978.7	954.6	2738.2	1695.8	1450.2	707.8	1243.3	356.4	898.7	554.3	1892.4	391.2	441.1	1391.2	1257.3	975.6	873.9	436.3	173.6	566.8	147.9	375	389.5	310	264.2	226.1	599.5	356.4
FALSE	High	Master Protein	Q9DB29	Isoamyl acetate-hydrolyzing esterase 1 homolog OS=Mus musculus OX=10090 GN=Iah1 PE=1 SV=1	0	32.778	30	6	14	6	6	249	28	5.52	51.32	6	0	1315.8	1242.7	1118.7	2667.5	1156.7	618.8	539.2	410.8	550	956.3	1174.4	1541.5	1259.7	1029.5	1169.9	292.7	1209.1	335.1	415.1	476.3	834.3	414.4	220.3	614.1	174.8	243.1	76.7	75.1	100.2	305.5	566.3	1541.5
FALSE	High	Master Protein	P61021	Ras-related protein Rab-5B OS=Mus musculus OX=10090 GN=Rab5b PE=1 SV=1	0	32.773	33	6	18	3	3	215	23.7	8.13	58.23	6	0	163.9	167.9	189.9	337.5	265.3	115.8	146.9	118.7	135	95.8	176.5	118.1	125	92.3	182.8	74.5	96.4	87	89.5	63.2	103.9	56	37.4	77.7	40.1	45.5	20.9	21.7	24.6	30.6	85.1	118.1
FALSE	High	Master Protein	Q6ZWN5	40S ribosomal protein S9 OS=Mus musculus OX=10090 GN=Rps9 PE=1 SV=3	0	32.707	41	10	17	10	10	194	22.6	10.65	42.14	10	0	3525.7	3238.3	2912.2	2694.8	2656.1	1304.4	1067.9	940.3	1417.2	1832.8	2170.5	2513	2289.6	2223	1947.1	1081.8	2175.4	1056.1	878.5	997.9	2235.6	1079.9	573.5	620.4	401.4	512.4	151.9	171.9	258.2	585.5	1046.6	2513
FALSE	High	Master Protein	Q9D662	Protein transport protein Sec23B OS=Mus musculus OX=10090 GN=Sec23b PE=1 SV=1	0	32.649	14	10	14	10	10	767	86.4	6.96	37.6	10	0	1312.8	1101.4	1026.8	985.1	978	640	582.1	539.9	578	971	876.4	1232.3	963.4	926.6	1117.1	548.9	1042.7	530.6	697.5	733.1	832.4	367.3	202.2	226.8	147.8	251.4	82.8	98.7	105.3	310.2	422.6	1232.3
FALSE	High	Master Protein	Q91V12	Cytosolic acyl coenzyme A thioester hydrolase OS=Mus musculus OX=10090 GN=Acot7 PE=1 SV=2	0	32.585	20	8	11	8	8	381	42.5	8.68	32.07	8	0	398.4	399.1	363.6	682.4	457.2	465.1	301.6	233	282.7	1293.8	430.5	1462.1	1125.4	1245.8	2606.9	555.5	1329.1	1152.6	1055.3	1160.2	252.6	133.1	71.6	157.1	69.1	182.7	42.9	42.6	51.5	413.3	207.6	1462.1
FALSE	High	Master Protein	Q9QWR8	Alpha-N-acetylgalactosaminidase OS=Mus musculus OX=10090 GN=Naga PE=1 SV=2	0	32.576	21	11	23	11	11	415	47.2	6.44	56.62	11	0	2535.8	1958.8	2156.6	1092	1968.6	765.2	841.5	898.2	893.6	2789.4	1694.6	3947.8	3458.6	3087.6	1360.7	1867.2	4047.5	1578.2	5080.3	1577.9	1607.9	653.2	424.7	251.4	297.5	300.6	119.7	164.2	162.8	891.1	817.1	3947.8
FALSE	High	Master Protein	P54775	26S proteasome regulatory subunit 6B OS=Mus musculus OX=10090 GN=Psmc4 PE=1 SV=2	0	32.565	28	11	18	10	10	418	47.4	5.21	51.33	11	0	1617.9	1482	1310.1	1721	1439.2	1062.5	1022.2	812.3	939.7	1194.5	1358.2	1342.2	1297.6	1337.2	1693.6	854	1255.8	1231.9	1170.6	1214.1	1025.9	494.2	258	396.2	217.5	417.4	145.4	148.5	171.2	381.6	654.9	1342.2
FALSE	High	Master Protein	P28658	Ataxin-10 OS=Mus musculus OX=10090 GN=Atxn10 PE=1 SV=2	0	32.563	20	10	14	10	10	475	53.7	5.25	40.65	10	0	1969.9	1553	1087.2	3284.7	1103.1	1079.9	1192.3	1059.6	1220.2	1482.2	1566	2118.3	1479	1356	3497.2	691.2	1612.4	960.5	931.6	854.8	1249.1	517.9	214.1	756.2	166.7	424.2	169.6	193.7	222.3	473.5	755.1	2118.3
FALSE	High	Master Protein	Q91YD6	Villin-like protein OS=Mus musculus OX=10090 GN=Vill PE=1 SV=1	0	32.541	11	10	12	10	10	859	96.4	6.35	34.31	10	0	1120	935.9	940.4	440	626	281.3	299.5	241.8	251.4	951.9	568.2	1304	1055	1318.5	821.1	414.6	1080.3	778.7	745.7	532.2	710.2	312.1	185.2	101.3	94.6	110.5	42.6	44.2	45.8	304.1	274	1304
FALSE	High	Master Protein	Q80VQ0	Aldehyde dehydrogenase family 3 member B1 OS=Mus musculus OX=10090 GN=Aldh3b1 PE=1 SV=1	0	32.535	18	8	19	3	7	468	52.3	7.55	48.31	8	0	1178.7	1060.6	1091.8	1493.8	866.2	600.3	1115.7	831.5	1056.6	590.4	780.4	698.1	837.9	860.5	584.5	451.8	541.4	646.1	498.3	388.5	747.4	353.7	215	343.9	130.9	235.8	158.7	152	192.5	188.6	376.3	698.1
FALSE	High	Master Protein	Q3UU35	Ovostatin homolog OS=Mus musculus OX=10090 GN=Ovos PE=2 SV=2	0	32.512	6	11	15	11	11	1456	162.2	5.26	40.7	11	0	684	560.5	818.6	392.7	1206.9	607.6	1112.2	655.3	1439.2	519.3	720.9	316.7	302.1	269.4	155.2	235.8	914.9	143	435.4	884.3	433.7	186.9	161.2	90.4	182.4	238.7	158.2	119.8	262.2	165.9	347.6	316.7
FALSE	High	Master Protein	Q8QZS1	3-hydroxyisobutyryl-CoA hydrolase, mitochondrial OS=Mus musculus OX=10090 GN=Hibch PE=1 SV=1	0	32.477	21	9	15	9	9	385	43	8.06	41.64	9	0	676.6	545.5	483.4	245.4	332.8	163.7	154.7	155.4	183.9	1169.5	339.9	2293.9	1534.9	1325.8	542.9	280.3	1569.7	291.2	492.7	428.9	429	181.9	95.2	56.5	50.3	64.3	22	28.4	33.5	373.6	163.9	2293.9
FALSE	High	Master Protein	Q80V42	Carboxypeptidase M OS=Mus musculus OX=10090 GN=Cpm PE=1 SV=2	0	32.408	21	8	14	8	8	443	50.5	7.78	43.98	8	0	1907.6	2573.8	3262.1	1461.2	4436.7	1215.8	1846.1	852.8	1377.2	1950.5	1786.2	2747	3380.7	3409.2	1050.2	971.5	3691.9	597	769.5	619.5	1209.6	858.3	642.4	336.4	670.5	477.6	262.6	155.9	250.9	623.1	861.3	2747
FALSE	High	Master Protein	Q9D0E1	Heterogeneous nuclear ribonucleoprotein M OS=Mus musculus OX=10090 GN=Hnrnpm PE=1 SV=3	0	32.404	17	14	21	14	14	729	77.6	8.63	47.12	14	0	3768.9	2430.2	3141.3	2138	2691.8	1126.7	1157.8	1096.2	1263.5	1466.2	2158.3	1979.4	2091.9	2633.7	1193.8	1239.4	2075.3	884.7	926.7	675.7	2389.8	810.4	618.6	492.2	406.8	442.6	164.7	200.4	230.2	468.4	1040.7	1979.4
FALSE	High	Master Protein	P42227	Signal transducer and activator of transcription 3 OS=Mus musculus OX=10090 GN=Stat3 PE=1 SV=2	0	32.295	13	10	17	10	10	770	88	6.3	44.75	10	0	1942.5	1885.6	1447.2	1366.5	1140.1	809.3	890.7	726.4	820	1394.6	1444.2	2129.1	1461.4	1263	1399.5	499.3	1573	560.8	814.9	954.8	1231.7	628.8	285	314.6	172.3	317.9	126.7	132.8	149.4	445.5	696.4	2129.1
FALSE	High	Master Protein	P97927	Laminin subunit alpha-4 OS=Mus musculus OX=10090 GN=Lama4 PE=1 SV=2	0	32.204	6	12	17	12	12	1816	201.7	6.21	38.54	12	0	263.7	263.9	395.1	601.2	734.5	566.7	2363.5	2705.6	1457.9	1432.4	852.8	577.8	593.1	798.4	1328.9	1220.4	601.6	6720.1	2985.7	2564	167.2	88	77.8	138.4	111	222.6	336.2	494.6	265.6	457.6	411.2	577.8
FALSE	High	Master Protein	P50543	Protein S100-A11 OS=Mus musculus OX=10090 GN=S100a11 PE=1 SV=1	0	32.183	51	5	17	5	5	98	11.1	5.45	50.26	5	0	5325.3	4955.1	3714.6	3334.7	1823.7	1969.8	1316	958.9	1900.8	532.8	2884.5	447	889.9	965.8	552.7	296.4	397.6	422.1	487.1	243.5	3376.7	1652.4	731.5	767.7	275.6	773.8	187.2	175.3	346.3	170.2	1390.9	447
FALSE	High	Master Protein	Q9WVJ9	EGF-containing fibulin-like extracellular matrix protein 2 OS=Mus musculus OX=10090 GN=Efemp2 PE=1 SV=1	0	32.158	23	9	17	9	9	443	49.4	4.89	45.91	9	0	391.4	452.2	600.7	534.7	705.4	923	1027.1	968.2	923.2	966.3	648.3	498.9	929.5	898.8	828.1	1487.6	782	2013.2	1599.1	1225.7	248.2	150.8	118.3	123.1	106.6	362.6	146.1	177	168.2	308.7	312.6	498.9
FALSE	High	Master Protein	Q91V64	Isochorismatase domain-containing protein 1 OS=Mus musculus OX=10090 GN=Isoc1 PE=1 SV=1	0	32.125	20	5	13	5	5	297	32	7.39	42.35	5	0	936.2	968.6	806.4	811	582.3	420.5	344.5	330.4	425.9	1142.9	716.5	1597.9	1430.1	1618.1	1154	713.1	1157	640	805.8	806.8	593.6	323	158.8	186.7	88	165.2	49	60.4	77.6	365.1	345.5	1597.9
FALSE	High	Master Protein	Q8BHL4	Retinoic acid-induced protein 3 OS=Mus musculus OX=10090 GN=Gprc5a PE=1 SV=1	0	32.104	19	6	20	6	6	356	40.1	7.62	58.32	6	0	730.5	1237.3	732.8	652.9	1187.8	502	737.5	596.3	888.1	939.4	648.5	1004.8	1582.5	1144.6	830	846	1329.1	1040.6	767.4	425.3	463.2	412.6	144.3	150.3	179.5	197.2	104.9	109	161.8	300.1	312.7	1004.8
FALSE	High	Master Protein	Q5FWK3	Rho GTPase-activating protein 1 OS=Mus musculus OX=10090 GN=Arhgap1 PE=1 SV=1	0	32.101	21	9	19	9	9	439	50.4	6.44	52.02	9	0	2317	2391.8	1710.8	5877.9	1901.1	1140.7	1327.3	1033.9	1123.6	2358.1	1932.6	2682.7	3086.1	2078.5	3883.9	929.2	2382.2	1024.2	1193.7	1257.6	1469.2	797.6	336.9	1353.2	287.3	448.1	188.8	189	204.7	753.3	931.9	2682.7
FALSE	High	Master Protein	P63028	Translationally-controlled tumor protein OS=Mus musculus OX=10090 GN=Tpt1 PE=1 SV=1	0	32.101	32	5	15	5	5	172	19.5	4.86	42.99	5	0	2292.6	2392.4	1709.3	1921.6	1254.6	770.1	842.2	1079.3	787.7	2595	1770.9	3797.7	4679.2	3070.4	1561.3	1051.1	2582.6	1408.5	1807.3	1735.9	1453.7	797.8	336.6	442.4	189.6	302.5	119.8	197.3	143.5	829	853.9	3797.7
FALSE	High	Master Protein	Q6IFZ6	Keratin, type II cytoskeletal 1b OS=Mus musculus OX=10090 GN=Krt77 PE=1 SV=1	0	32.055	7	8	26	1	1	572	61.3	8.02	69.5	8	0	76.8	201.5	130.5	146.8	164.8	252.3	271.4	459.5	197.1		155.5										48.7	67.2	25.7	33.8	24.9	99.1	38.6	84	35.9		75
FALSE	High	Master Protein	Q61361	Brevican core protein OS=Mus musculus OX=10090 GN=Bcan PE=1 SV=2	0	32.007	12	12	18	12	12	883	95.8	4.93	39.83	12	0	1157.3	1287.3	1512.7	822.7	1517.9	571	386.7	342.4	463.3	669.9	886.4	867.2	1468.9	1276	917.9	446.7	1240	307.5	355.7	232.1	733.8	429.3	297.9	189.4	229.4	224.3	55	62.6	84.4	214	427.4	867.2
FALSE	High	Master Protein	O70145	Neutrophil cytosol factor 2 OS=Mus musculus OX=10090 GN=Ncf2 PE=1 SV=1	0	31.937	16	10	13	10	10	525	59.4	6.61	34.02	10	0	398.1	403.9	297.6	433.1	414.2	306.2	516.7	547.6	428.7	1713.9	474.5	2268.2	1104.3	1391.1	1288.2	1284.7	1863.8	851.1	1308.3	2373.1	252.4	134.7	58.6	99.7	62.6	120.3	73.5	100.1	78.1	547.5	228.8	2268.2
FALSE	High	Master Protein	P97372	Proteasome activator complex subunit 2 OS=Mus musculus OX=10090 GN=Psme2 PE=1 SV=4	0	31.915	25	7	17	7	7	239	27	5.76	52.47	7	0	1478.5	1519.1	1364.5	1765.7	1070.6	781	910.4	820.5	760.2	1724.5	1258	2391.8	1966.4	1684.2	2102.3	750.4	1955.3	865.7	939.3	1265.3	937.5	506.6	268.7	406.5	161.8	306.8	129.5	150	138.5	550.9	606.6	2391.8
FALSE	High	Master Protein	Q9CPW4	Actin-related protein 2/3 complex subunit 5 OS=Mus musculus OX=10090 GN=Arpc5 PE=1 SV=3	0	31.909	56	8	16	8	8	151	16.3	5.67	46.02	8	0	3199.6	3139.4	4312.2	3485.4	2435.1	1631.2	2750.9	3101.6	2099.5	1697	3032.8	1824.6	1773.6	2053.2	1499.6	862.8	1401.2	1224.1	1599.1	2024.5	2028.8	1046.9	849.2	802.4	368	640.8	391.3	567	382.5	542.1	1462.4	1824.6
FALSE	High	Master Protein	Q68FL6	Methionine--tRNA ligase, cytoplasmic OS=Mus musculus OX=10090 GN=Mars1 PE=1 SV=1	0	31.69	11	12	16	12	12	902	101.4	7.14	41.9	12	0	1447.1	1323.3	1238	1279.7	1388.3	648.9	591.9	445.3	497.3	1076.8	922.9	1576.9	1197.6	1480.1	1220	527	1255.5	715	827.5	589.8	917.6	441.3	243.8	294.6	209.8	254.9	84.2	81.4	90.6	344	445	1576.9
FALSE	High	Master Protein	Q03958	Prefoldin subunit 6 OS=Mus musculus OX=10090 GN=Pfdn6 PE=1 SV=1	0	31.663	55	8	18	8	8	127	14.4	8.88	48.67	8	0	3383.8	2897.7	2787.8	3351.6	2066.5	1827.2	1427.8	1297.5	1495.7	1263.1	2613.7	1758.6	1369.8	1312.8	1583.8	651.8	1573.3	818.4	773.7	852.1	2145.6	966.3	549	771.6	312.3	717.8	203.1	237.2	272.5	403.5	1260.3	1758.6
FALSE	High	Master Protein	Q9DBB8	Trans-1,2-dihydrobenzene-1,2-diol dehydrogenase OS=Mus musculus OX=10090 GN=Dhdh PE=1 SV=1	0	31.643	26	8	17	8	8	333	36.3	6.44	55.01	8	0	1417.5	1284.7	1063.8	801.8	672.3	424.4	342.4	337	384.2	1319.1	940.5	2284.9	1844.5	1349.5	1170.9	756.2	1554.4	646.1	752	584.2	898.8	428.4	209.5	184.6	101.6	166.7	48.7	61.6	70	421.4	453.5	2284.9
FALSE	High	Master Protein	Q9JJU8	SH3 domain-binding glutamic acid-rich-like protein OS=Mus musculus OX=10090 GN=Sh3bgrl PE=1 SV=1	0	31.629	48	6	15	6	6	114	12.8	4.92	46	6	0	866.9	992.3	888.7	2458.5	741.8	424.4	469.6	411.4	373.8	1918.6	796.6	2807.9	2479.4	1716	3471.5	765	1967.3	1162.9	1116.8	1014.9	549.7	330.9	175	566	112.1	166.7	66.8	75.2	68.1	612.9	384.1	2807.9
FALSE	High	Master Protein	P23506	Protein-L-isoaspartate(D-aspartate) O-methyltransferase OS=Mus musculus OX=10090 GN=Pcmt1 PE=1 SV=3	0	31.616	38	8	18	8	8	227	24.6	7.65	52.21	8	0	2439.1	2136.9	1639.7	1723.1	1364.4	609.9	445	449.1	563.7	1279.4	1718.8	2642.1	1839.6	1248.3	1270.9	470.8	2022.7	509.1	689.1	520.5	1546.6	712.6	322.9	396.7	206.2	239.6	63.3	82.1	102.7	408.7	828.8	2642.1
FALSE	High	Master Protein	P14869	60S acidic ribosomal protein P0 OS=Mus musculus OX=10090 GN=Rplp0 PE=1 SV=3	0	31.548	21	7	16	7	7	317	34.2	6.25	45.84	7	0	1652	1337.4	1192.3	1417.3	1251.3	978	918.1	841.3	893	1765.8	1298	2058.1	1299.4	1431.9	2706	949.6	1961	960.5	1216.8	1838.4	1047.5	446	234.8	326.3	189.1	384.2	130.6	153.8	162.7	564.1	625.9	2058.1
FALSE	High	Master Protein	P01801	Ig heavy chain V-III region J606 OS=Mus musculus OX=10090 PE=1 SV=1	0	31.496	43	4	18	1	1	115	12.8	7.12	43.07	4	5	686.5	889.7	1134.4	1550.7	794	1230.8	5183.2	3675.4	4509.7	1156.7	2112.2	298.7	330.7	362.5	6712.8	5379.6	683.7	2059.7	846.4	1153.8	435.3	296.7	223.4	357	120	483.5	737.3	671.9	821.6	369.5	1018.5	298.7
FALSE	High	Master Protein	O70318	Band 4.1-like protein 2 OS=Mus musculus OX=10090 GN=Epb41l2 PE=1 SV=2	0	31.489	12	12	15	8	10	988	109.9	5.43	34.6	12	2	428.6	389.2	374.2	493.9	435.4	277.7	303	408.6	364.5	1505.4	410.2	1642.1	1233.7	1280.1	2095.3	934.3	1383	923.5	1371.2	1358.3	271.8	129.8	73.7	113.7	65.8	109.1	43.1	74.7	66.4	480.9	197.8	1642.1
FALSE	High	Master Protein	O70475	UDP-glucose 6-dehydrogenase OS=Mus musculus OX=10090 GN=Ugdh PE=1 SV=1	0	31.474	18	9	16	9	9	493	54.8	7.56	41.5	9	0	943.1	821	776.9	689.3	674.3	343.7	444.3	507.1	406.7	683	596	989.1	833.9	965.8	827.7	297.8	691	396.3	517.2	425.7	598	273.8	153	158.7	101.9	135	63.2	92.7	74.1	218.2	287.4	989.1
FALSE	High	Master Protein	P70698	CTP synthase 1 OS=Mus musculus OX=10090 GN=Ctps1 PE=1 SV=2	0	31.46	15	9	15	6	6	591	66.6	6.58	42.34	9	3	1004.6	901.7	766.8	2245.7	911.8	1141.5	1041.1	907	756.9	1054	1297.6	855.5	777.1	772.3	2486.7	645.3	894.7	1318	1600.5	1465.7	637	300.7	151	517	137.8	448.4	148.1	165.8	137.9	336.7	625.7	855.5
FALSE	High	Master Protein	Q99KH8	Serine/threonine-protein kinase 24 OS=Mus musculus OX=10090 GN=Stk24 PE=1 SV=1	0	31.375	20	9	14	3	6	431	47.9	5.43	36.51	9	3	1282.2	1235.8	1064.4	1353.5	1259.2	670.8	600.4	547.6	548.3	1336.3	1053.9	1644.5	1290.5	1280.1	1504.7	735.8	1550.5	594.4	663.9	944.1	813	412.1	209.6	311.6	190.3	263.5	85.4	100.1	99.9	426.9	508.2	1644.5
FALSE	High	Master Protein	P68037	Ubiquitin-conjugating enzyme E2 L3 OS=Mus musculus OX=10090 GN=Ube2l3 PE=1 SV=1	0	31.363	62	6	11	6	6	154	17.9	8.51	44.29	6	0	2030.6	1714.4	1227.9	2730.4	1083.2	577.3	624.3	448	483.6	1599.9	1513.1	2600.3	2221.4	1448.3	1113.4	594.2	1802.4	544.4	641.6	611.1	1287.6	571.7	241.8	628.6	163.7	226.8	88.8	81.9	88.1	511.1	729.6	2600.3
FALSE	High	Master Protein	O89029	Matrilin-4 OS=Mus musculus OX=10090 GN=Matn4 PE=1 SV=1	0	31.332	16	10	17	10	10	624	68.9	5.76	38.61	10	0	681	772.2	897.8	848.3	1103.1	1173.8	634.1	775.1	832.1	1184.2	742.7	1176.6	1255.8	1433.6	1952.2	2159.1	1450.4	2201	1221.7	526.6	431.8	257.5	176.8	195.3	166.7	461.1	90.2	141.7	151.6	378.3	358.1	1176.6
FALSE	High	Master Protein	Q62422	Osteoclast-stimulating factor 1 OS=Mus musculus OX=10090 GN=Ostf1 PE=1 SV=2	0	31.262	40	7	15	7	7	215	23.8	5.68	37.91	7	0	2169.7	1821.1	1310.1	3345.1	1054.8	655.8	801.4	698.5	799.2	813.9	1433.7	1215.2	1057.2	764.1	1068.5	389.1	962.6	379	441.7	510.9	1375.8	607.3	258	770.1	159.4	257.6	114	127.7	145.6	260	691.3	1215.2
FALSE	High	Master Protein	P46061	Ran GTPase-activating protein 1 OS=Mus musculus OX=10090 GN=Rangap1 PE=1 SV=2	0	31.247	17	10	14	10	10	589	63.5	4.68	32.46	10	0	530.7	497.8	434.7	1202.8	653.8	509.4	538.5	490.7	494	686.5	530.5	676.6	571.1	668.6	1073.6	643.8	607.8	983.8	893.9	822.9	336.5	166	85.6	276.9	98.8	200.1	76.6	89.7	90	219.3	255.8	676.6
FALSE	High	Master Protein	Q9CX00	IST1 homolog OS=Mus musculus OX=10090 GN=Ist1 PE=1 SV=1	0	31.166	22	8	13	7	8	362	39.4	5.44	43.04	8	0	1601.5	1598.9	1169	1290.1	1052.8	528	715.7	833.1	750.9	1506	1243.5	2294.4	2044.4	1653.2	1342.9	516.1	1646.4	691.7	777.2	592.1	1015.5	533.2	230.2	297	159.1	207.4	101.8	152.3	136.8	481.1	599.6	2294.4
FALSE	High	Master Protein	P13634	Carbonic anhydrase 1 OS=Mus musculus OX=10090 GN=Ca1 PE=1 SV=4	0	31.164	25	6	12	6	6	261	28.3	6.96	38.78	6	0	1505.5	1905.1	380.9	468.2	377.2	640.5	466.8	617.6	541.8	1196.1	626.1	592.4	810.2	591.1	291.8	1478.1	564.3	337.7	1641.7	857.5	954.6	635.3	75	107.8	57	251.6	66.4	112.9	98.7	382.1	301.9	592.4
FALSE	High	Master Protein	P09528	Ferritin heavy chain OS=Mus musculus OX=10090 GN=Fth1 PE=1 SV=2	0	31.137	49	8	16	8	8	182	21.1	5.88	46.67	8	0	2400.2	2231.9	2284.6	1429.1	1603.3	767.5	727.6	623.1	964.9	2438.5	1579	3367.7	3140.3	5028.1	1565.1	1052.6	4551.1	785.6	1286.7	848.2	1521.9	744.3	449.9	329	242.3	301.5	103.5	113.9	175.8	779	761.4	3367.7
FALSE	High	Master Protein	P70195	Proteasome subunit beta type-7 OS=Mus musculus OX=10090 GN=Psmb7 PE=1 SV=1	0	31.133	21	5	12	5	5	277	29.9	7.99	37.29	5	0	706.5	773.4	608.3	539.9	588.3	557.2	539.9	446.4	416.6	1239	463.7	1466.1	1644.6	1640.1	997.4	1038.7	1247	1051	1125.9	1220	448	257.9	119.8	124.3	88.9	218.9	76.8	81.6	75.9	395.8	223.6	1466.1
FALSE	High	Master Protein	P83741	Serine/threonine-protein kinase WNK1 OS=Mus musculus OX=10090 GN=Wnk1 PE=1 SV=2	0	31.13	5	11	11	11	11	2377	250.8	6.43	27.8	11	0	518.7	490	459.1	933.9	378.5	527.5	446.4	420.1	444.6	657.1	494.6	647.7	605	532.3	1508.5	342.3	539.9	442.8	752	650.8	328.9	163.4	90.4	215	57.2	207.2	63.5	76.8	81	209.9	238.5	647.7
FALSE	High	Master Protein	Q8R317	Ubiquilin-1 OS=Mus musculus OX=10090 GN=Ubqln1 PE=1 SV=1	0	31.104	17	8	13	4	4	582	61.9	4.94	41.07	8	4	550.4	552.1	676.4	324.9	692.8	550.9	306.5	354.5	332.6	403.2	498.1	529.9	436.3	613.1	351.6	172.3	438	246.4	292.1	234.2	349	184.1	133.2	74.8	104.7	216.4	43.6	64.8	60.6	128.8	240.2	529.9
FALSE	High	Master Protein	Q6P9R2	Serine/threonine-protein kinase OSR1 OS=Mus musculus OX=10090 GN=Oxsr1 PE=1 SV=1	0	31.085	17	9	19	8	8	527	58.2	6.43	50.18	9	1	1900.4	1781.2	1420.3	1721	1242	686.6	644.7	668.5	787.1	1077.1	1249.5	1633.7	1201.6	1046.6	1403.3	483.2	1283.8	525.5	691.2	614.8	1205	594	279.7	396.2	187.7	269.7	91.7	122.2	143.4	344.1	602.5	1633.7
FALSE	High	Master Protein	Q9WUK2	Eukaryotic translation initiation factor 4H OS=Mus musculus OX=10090 GN=Eif4h PE=1 SV=3	0	31.077	29	8	17	8	8	248	27.3	7.23	52.65	8	0	3177.8	2610.7	2059.6	7212.7	1974.5	1290.4	1683.7	1258.7	1272.9	2334.6	2548	2909.4	2803.5	2098.1	5033.7	856.9	2285.3	1384.3	1303.4	962.5	2015	870.6	405.6	1660.5	298.4	506.9	239.5	230.1	231.9	745.8	1228.6	2909.4
FALSE	High	Master Protein	Q9D2V7	Coronin-7 OS=Mus musculus OX=10090 GN=Coro7 PE=1 SV=2	0	31.05	11	10	15	10	10	922	100.7	5.77	39	10	0	800.7	727.8	778	899.1	695.5	527.5	712.8	856.1	668	1252.4	742.2	1316	1069.5	1207.4	1260.6	603.7	1155.5	694.3	1086.8	1775.1	507.7	242.7	153.2	207	105.1	207.2	101.4	156.5	121.7	400.1	357.9	1316
FALSE	High	Master Protein	Q8K4Z3	NAD(P)H-hydrate epimerase OS=Mus musculus OX=10090 GN=Naxe PE=1 SV=1	0	31.049	27	6	25	6	6	282	31	7.69	72.88	6	0	1596.6	1632.5	1481.3	1162.4	1253.3	795.8	561.7	634	648.8	1502.2	1228.6	2097.4	2136.8	1718.5	1925.6	838	1640.7	951	1027.4	825.1	1012.4	544.4	291.7	267.6	189.4	312.6	79.9	115.9	118.2	479.9	592.4	2097.4
FALSE	High	Master Protein	Q9CXW3	Calcyclin-binding protein OS=Mus musculus OX=10090 GN=Cacybp PE=1 SV=1	0	31.046	31	9	19	8	8	229	26.5	7.87	49.38	9	0	5685.8	4099.8	3764.3	2394.2	3898.8	1625.9	1098.8	995	1072.5	2676.4	3342	5376.5	4058.8	3179.8	1737.1	914.6	4069.6	819.2	913.5	1035.3	3605.3	1367.2	741.3	551.2	589.2	638.7	156.3	181.9	195.4	855	1611.5	5376.5
FALSE	High	Master Protein	P61089	Ubiquitin-conjugating enzyme E2 N OS=Mus musculus OX=10090 GN=Ube2n PE=1 SV=1	0	31.002	51	8	22	7	8	152	17.1	6.57	62.84	8	0	5791.8	4745.2	3711.5	5411.4	3239.7	1450	1102.3	854.4	1011.6	3328.2	3863.4	6375.5	4435.2	3018.2	2937.5	1116.8	4039	981.2	999.4	1033.9	3672.5	1582.4	730.9	1245.8	489.6	569.6	156.8	156.2	184.3	1063.2	1862.9	6375.5
FALSE	High	Master Protein	Q99J08	SEC14-like protein 2 OS=Mus musculus OX=10090 GN=Sec14l2 PE=1 SV=1	0	30.933	17	6	18	6	6	403	46.3	7.11	57.3	6	0	3339.1	3098.3	2055.1	2101.9	1086.5	737.2	587	363.2	567.6	1540.7	1725.9	2162.1	3432.2	2422.2	993.6	753.3	1355	571.1	647.9	663.7	2117.3	1033.2	404.7	483.9	164.2	289.6	83.5	66.4	103.4	492.2	832.2	2162.1
FALSE	High	Master Protein	P42225	Signal transducer and activator of transcription 1 OS=Mus musculus OX=10090 GN=Stat1 PE=1 SV=1	0	30.903	13	9	11	9	9	749	87.1	5.58	34.49	9	0	552.6	558.7	543.9	799.2	565.1	487	442.9	473.7	417.2	741.9	508.1	703.3	529.3	641.7	1061.4	591.2	721.8	646.1	589.9	793.6	350.4	186.3	107.1	184	85.4	191.3	63	86.6	76	237	245	703.3
FALSE	High	Master Protein	P32020	Non-specific lipid-transfer protein OS=Mus musculus OX=10090 GN=Scp2 PE=1 SV=3	0	30.841	11	7	12	7	7	547	59.1	7.44	37.16	7	0	1093.9	819.2	736.8	532.5	894	333.7	261.5	241.2	287.1	718.1	762.4	1530.9	1039.6	879.2	369.4	393.4	1358.7	262.7	304	252.3	693.6	273.2	145.1	122.6	135.1	131.1	37.2	44.1	52.3	229.4	367.6	1530.9
FALSE	High	Master Protein	Q8BH43	Wiskott-Aldrich syndrome protein family member 2 OS=Mus musculus OX=10090 GN=Wasf2 PE=1 SV=1	0	30.748	21	11	16	11	11	497	54	5.53	40.91	11	0	1012.6	837.2	850.6	1406.1	789.4	609.4	658	731.9	597.7	969.8	936.4	1181.5	1046.6	1114.4	972.1	785.4	1010.8	699.5	1291.6	902.6	642.1	279.2	167.5	323.7	119.3	239.4	93.6	133.8	108.9	309.8	451.5	1181.5
FALSE	High	Master Protein	P41241	Tyrosine-protein kinase CSK OS=Mus musculus OX=10090 GN=Csk PE=1 SV=2	0	30.746	17	8	14	8	8	450	50.7	7.06	39.74	8	0	1423.2	1196.5	979	1091.1	956.8	557.2	556.1	539.4	615.9	965.1	1050.2	1472.2	1038.3	1080.1	925.8	499.3	1165.8	559.9	484.3	572.4	902.4	399	192.8	251.2	144.6	218.9	79.1	98.6	112.2	308.3	506.4	1472.2
FALSE	High	Master Protein	Q9D8E6	60S ribosomal protein L4 OS=Mus musculus OX=10090 GN=Rpl4 PE=1 SV=3	0	30.706	16	7	12	7	7	419	47.1	11	34.4	7	0	724.8	672.3	593.1	435.2	856.9	472.2	429.5	404.2	485.2	1129.7	623.8	1321.2	1170.8	1451.5	1342.9	1292	1353.8	1327.5	751.3	716.3	459.6	224.2	116.8	100.2	129.5	185.5	61.1	73.9	88.4	360.9	300.8	1321.2
FALSE	High	Master Protein	Q05D44	Eukaryotic translation initiation factor 5B OS=Mus musculus OX=10090 GN=Eif5b PE=1 SV=2	0	30.7	8	10	13	10	10	1216	137.5	5.59	38.44	10	0	868.5	826.4	957.7	789.2	1118.9	824	800.7	651	705.9	406	763.8	575.8	396.3	438.4	448	321.9	465.8	310.1	320.8	333.7	550.7	275.6	188.6	181.7	169.1	323.7	113.9	119	128.6	129.7	368.3	575.8
FALSE	High	Master Protein	O54950	5'-AMP-activated protein kinase subunit gamma-1 OS=Mus musculus OX=10090 GN=Prkag1 PE=1 SV=2	0	30.644	28	9	13	6	9	330	37.5	7.14	35.1	9	0	1178.7	1018.1	861.7	754.5	712.7	336.3	345.9	286.1	337	1033.3	792.8	1480.2	975.7	986.2	927.2	461.3	1067.3	533.2	740.1	592.5	747.4	339.5	169.7	173.7	107.7	132.1	49.2	52.3	61.4	330.1	382.3	1480.2
FALSE	High	Master Protein	Q8R5C5	Beta-centractin OS=Mus musculus OX=10090 GN=Actr1b PE=1 SV=1	0	30.629	22	10	17	3	3	376	42.3	6.4	43.18	10	0	251.2	227.9	204.6	250.6	212.4	105.4	125.8	87	111.4	581.3	169.4	641.4	595.7	613.1	597.1	327.7	612.7	366.1	1525	502.1	159.3	76	40.3	57.7	32.1	41.4	17.9	15.9	20.3	185.7	81.7	641.4
FALSE	High	Master Protein	P61939	Thyroxine-binding globulin OS=Mus musculus OX=10090 GN=Serpina7 PE=2 SV=1	0	30.499	20	9	20	9	9	418	47	6.54	55.18	9	0	1168.9	2070.6	1556.9	6381.3	2351	4395.5	1439	1114.3	2280.1	2561.6	2559.4	861.7	1169.5	1212.3	6451	5057	2580	1193.1	1258	3354.4	741.2	690.5	306.6	1469.1	355.3	1726.7	204.7	203.7	415.4	818.3	1234.1	861.7
FALSE	High	Master Protein	P07742	Ribonucleoside-diphosphate reductase large subunit OS=Mus musculus OX=10090 GN=Rrm1 PE=1 SV=2	0	30.498	11	9	11	9	9	792	90.2	6.7	30.65	9	0	755.1	668.1	605.8	1660.2	755	526.9	613	630.7	492.9	323.4	791	303.4	238.2	307.8	859.4	147.4	286.7	256.7	349.4	289.7	478.8	222.8	119.3	382.2	114.1	207	87.2	115.3	89.8	103.3	381.4	303.4
FALSE	High	Master Protein	O35737	Heterogeneous nuclear ribonucleoprotein H OS=Mus musculus OX=10090 GN=Hnrnph1 PE=1 SV=3	0	30.485	19	7	14	3	3	449	49.2	6.3	43.31	7	2	657.2	477.7	523.5	325.3	722.6	306	267.8	277.9	331.5	159.3	404.2	209.9	191.1	200.8	75.8	63.5	195.7	48.2	47.5	54.2	416.7	159.3	103.1	74.9	109.2	120.2	38.1	50.8	60.4	50.9	194.9	209.9
FALSE	High	Master Protein	P35123	Ubiquitin carboxyl-terminal hydrolase 4 OS=Mus musculus OX=10090 GN=Usp4 PE=1 SV=3	0	30.477	11	8	11	8	8	962	108.3	5.64	33.26	8	0	463.2	514.3	437.2	642.4	389.1	337.3	390.9	330.4	424.3	548.1	421	577.4	468.9	493.1	591.5	424.8	458.5	358.4	531.9	408.5	293.7	171.5	86.1	147.9	58.8	132.5	55.6	60.4	77.3	175.1	203	577.4
FALSE	High	Master Protein	P27659	60S ribosomal protein L3 OS=Mus musculus OX=10090 GN=Rpl3 PE=1 SV=3	0	30.455	22	11	18	11	11	403	46.1	10.21	41.66	11	0	2247.2	2031.3	1945.9	2500.2	2294.8	1163.1	1040.4	1097.3	1255.9	2911.5	1902.8	4030.8	2838.7	3477.8	4519.8	2713.2	3281.4	2593.8	1720	1783.8	1424.9	677.4	383.2	575.6	346.8	456.9	148	200.6	228.8	930.1	917.5	4030.8
FALSE	High	Master Protein	P62242	40S ribosomal protein S8 OS=Mus musculus OX=10090 GN=Rps8 PE=1 SV=2	0	30.415	40	7	16	7	7	208	24.2	10.32	53.38	7	0	1080.6	1232.2	1104	1056.4	1179.2	590.8	726.2	659.2	750.3	809.2	818.3	890	830.4	880.1	920.7	792.7	827.3	823.5	592	546.5	685.2	410.9	217.4	243.2	178.2	232.1	103.3	120.5	136.7	258.5	394.6	890
FALSE	High	Master Protein	P01638	Ig kappa chain V-V region L6 (Fragment) OS=Mus musculus OX=10090 PE=4 SV=1	0	30.366	36	3	13	1	3	115	13	7.81	49.87	3	0	334.7	454.3	941	491.3	403.6	960.5	1235.9	2096.7	2315.2	1493.8	930.1	506.7	573.3	963.3	4804.1	5151.1	1734.5	3774	1600.5	1231.8	212.2	151.5	185.3	113.1	61	377.3	175.8	383.3	421.8	477.2	448.5	506.7
FALSE	High	Master Protein	Q8BZW8	NHL repeat-containing protein 2 OS=Mus musculus OX=10090 GN=Nhlrc2 PE=1 SV=1	0	30.352	12	9	14	9	9	725	78.4	5.54	40.17	9	0	1141.8	1097.2	845	1164.5	708	472.5	530.8	404.2	453.9	1729.8	904.6	2865.4	2277.7	2690.8	1315.4	667.9	2122	659	889	902	724	365.9	166.4	268.1	107	185.6	75.5	73.9	82.7	552.6	436.2	2865.4
FALSE	High	Master Protein	Q9D5V6	Synapse-associated protein 1 OS=Mus musculus OX=10090 GN=Syap1 PE=1 SV=1	0	30.272	21	6	10	6	6	365	41.3	4.54	33.51	6	0	627.2	660	848	519.9	571.1	399.2	405.6	419.6	426.5	501.2	519.9	596.8	664.9	711.9	407.7	343.8	513.7	469.5	545.1	379.9	397.7	220.1	167	119.7	86.3	156.8	57.7	76.7	77.7	160.1	250.7	596.8
FALSE	High	Master Protein	Q61210	Rho guanine nucleotide exchange factor 1 OS=Mus musculus OX=10090 GN=Arhgef1 PE=1 SV=2	0	30.219	10	9	15	9	9	920	102.7	5.6	39.14	9	0	488.7	451.3	402.7	641.1	461.9	293.5	313.5	366	373.8	967	462.3	1105.5	834.8	1041.7	1409.8	629.2	979.5	617.7	756.9	999.9	309.9	150.5	79.3	147.6	69.8	115.3	44.6	66.9	68.1	308.9	222.9	1105.5
FALSE	High	Master Protein	P28651	Carbonic anhydrase-related protein OS=Mus musculus OX=10090 GN=Ca8 PE=1 SV=5	0	30.205	24	6	16	6	6	291	33.1	4.78	48.96	6	0	2870.9	2355.5	2124.6	920.4	1713.8	783	448.5	503.3	601	386.3	2016	707.7	535.4	570.7	280.6	215.3	518.1	248.1	618.5	168.4	1820.4	785.5	418.4	211.9	259	307.6	63.8	92	109.5	123.4	972.1	707.7
FALSE	High	Master Protein	P0DP27	Calmodulin-2 OS=Mus musculus OX=10090 GN=Calm2 PE=1 SV=1	0	30.151	34	8	21	4	5	149	16.8	4.22	61.97	8	3	8143.6	8167.6	9834.1	7932.9	6724.2	2871.7	4955.5	3753.1	2895.9	7063.6	6032.7	9133.3	16705.8	17357.2	3520.1	3259.9	7059.3	3072.7	4431.7	4558.8	5163.7	2723.7	1936.6	1826.3	1016.2	1128.1	704.9	686.1	527.6	2256.5	2908.9	9133.3
FALSE	High	Master Protein	Q9DC11	Plexin domain-containing protein 2 OS=Mus musculus OX=10090 GN=Plxdc2 PE=1 SV=1	0	30.125	16	7	13	6	7	530	59.6	6.6	46.6	7	0	342.5	362.8	367.1	422.6	555.2	572.3	423.2	588.6	518.7	1794.3	455.4	1978.1	2811.4	1497.3	1528.6	1836.5	1831.4	3369.1	3012.9	1046.8	217.2	121	72.3	97.3	83.9	224.8	60.2	107.6	94.5	573.2	219.6	1978.1
FALSE	High	Master Protein	P01644	Ig kappa chain V-V region HP R16.7 OS=Mus musculus OX=10090 PE=1 SV=1	0	30.111	57	5	22	0	2	108	11.9	7.97	78.33	5	0	145.4	195.5	213.3	162	150.9	266.5	456.2	540.5	464.4	586.9	329.5	182.5	244.4	271	1095.1	1164.2	433.6	765	624.8	822.6	92.2	65.2	42	37.3	22.8	104.7	64.9	98.8	84.6	187.5	158.9	182.5
FALSE	High	Master Protein	Q62356	Follistatin-related protein 1 OS=Mus musculus OX=10090 GN=Fstl1 PE=1 SV=2	0	30.105	33	9	15	9	9	306	34.5	5.85	41.85	9	0	249.8	280.4	400.7	357.1	641.9	2742.1	3301.3	4374.5	1874.5	1389.2	2684.4	251.4	356.7	391.9	438.1	811.7	340.1	1459.3	2494.3	4812.9	158.4	93.5	78.9	82.2	97	1077.2	469.6	799.7	341.5	443.8	1294.4	251.4
FALSE	High	Master Protein	Q9JMD3	START domain-containing protein 10 OS=Mus musculus OX=10090 GN=Stard10 PE=1 SV=1	0	30.06	25	6	13	6	6	291	32.9	7.12	46.18	6	0	2125	1850.2	1368.5	852.2	759.6	537.4	376.1	318.9	453.9	452.6	1307	867.9	602.3	382.1	234.7	143.1	499.5	170.6	120.9	106.3	1347.4	617	269.5	196.2	114.8	211.1	53.5	58.3	82.7	144.6	630.2	867.9
FALSE	High	Master Protein	Q99JI6	Ras-related protein Rap-1b OS=Mus musculus OX=10090 GN=Rap1b PE=1 SV=2	0	29.974	41	7	14	1	1	184	20.8	5.78	44.29	7	0	91.2	121.1	98	79.5	78.7	86.3	86.5	82.6	81.8		129.2										57.8	40.4	19.3	18.3	11.9	33.9	12.3	15.1	14.9		62.3
FALSE	High	Master Protein	Q9CQC6	Basic leucine zipper and W2 domain-containing protein 1 OS=Mus musculus OX=10090 GN=Bzw1 PE=1 SV=1	0	29.919	20	12	24	10	10	419	48	5.92	56.32	12	2	3279.4	2868.6	2206.9	3544.5	2351.7	1250.9	1331.5	1346.8	1311.8	2532.4	2314.4	3499.8	2390.9	2312	3342.9	949.6	3010.8	1368.8	1638.2	1686.7	2079.4	956.6	434.6	816	355.4	491.4	189.4	246.2	239	809	1116	3499.8
[truncated: 2,865 more rows]
[truncated: 10 more columns]
