# Supplementary material for: Lack of alpha1,2-fucosylation protects mice from bleomycin-induced lung fibrosis
Source: Research Square preprint supplement (doi:10.21203/rs.3.rs-6044497/v1), 2025-03-14
Supplement: Supplementary file 2 [file f0c0356049974287c9f225a8.docx]

**Supplementary Table 1. Top 20 up-regulated proteins in wild type mice, 7 days after bleomycin treatment.**

| GeneName | Accession | Description | MEAN WT_Day7 | MEAN WT_Day0 | FOLD CHANGE | Function |
| --- | --- | --- | --- | --- | --- | --- |
| Bpifa2 | P07743 | BPI fold-containing family A member 2 | 1714.3441 | 68.4769 | 25.0354 | Involved in lipid metabolism and potentially related to antimicrobial defense |
| Mgp | P19788 | Matrix Gla protein | 2698.6886 | 151.7889 | 17.7792 | Regulates the mineralization process in bone and cartilage |
| Fst | P47931 | Follistatin | 573.9345 | 40.1778 | 14.2849 | Inhibits activin signaling, involved in cell proliferation and differentiation |
| Bgn | P28653 | Biglycan | 4968.8298 | 366.0047 | 13.5759 | A small leucine-rich proteoglycan that contributes to the structure and function of the extracellular matrix |
| Timp1 | P12032 | Metalloproteinase inhibitor 1 | 1741.4280 | 162.4436 | 10.7202 | Inhibits matrix metalloproteinases, involved in extracellular matrix remodeling |
| Col5a1 | O88207 | Collagen alpha-1(V) chain | 2339.1205 | 242.8232 | 9.6330 | Part of the collagen structure in tissues such as skin and blood vessels |
| Vcan | Q62059 | Versican core protein | 2914.6243 | 322.3577 | 9.0416 | A large proteoglycan that contributes to the structure and function of the extracellular matrix |
| Apoa1 | Q00623 | Apolipoprotein A-I | 59102.7747 | 7060.3703 | 8.3711 | A major component of high-density lipoproteins, involved in lipid metabolism and reverse cholesterol transport |
| C4bpa | P08607 | C4b-binding protein | 6663.0239 | 801.8725 | 8.3093 | Involved in the regulation of the complement system |
| Apoa2 | P09813 | Apolipoprotein A-II | 1856.6745 | 230.8606 | 8.0424 | Participates in lipoprotein assembly and metabolism |
| C1qtnf5 | Q8K479 | Complement C1q tumor necrosis factor-related protein 5 | 732.2994 | 94.8211 | 7.7230 | May be involved in immune regulation and apoptosis |
| Vmn2r1 | O70410 | Vomeronasal type-2 receptor 1 | 1496.4613 | 194.0065 | 7.7135 | Participates in olfactory sensation |
| Ltbp1 | Q8CG19 | Latent-transforming growth factor beta-binding protein 1 | 1443.7975 | 188.4165 | 7.6628 | Involved in the activation of TGF-β and extracellular matrix remodeling |
| Sparcl1 | P70663 | SPARC-like protein 1 | 13269.6611 | 1765.2765 | 7.5170 | Involved in extracellular matrix remodeling and regulation of cell proliferation and differentiation |
| Sprr1a | Q62266 | Cornifin-A | 943.9081 | 127.9609 | 7.3765 | Associated with the process of cornification |
| Col5a2 | Q3U962 | Collagen alpha-2(V) chain | 624.6391 | 88.1335 | 7.0874 | Part of the collagen structure in tissues such as skin and blood vessels |
| Mmp2 | P33434 | 72 kDa type IV collagenase | 7944.3586 | 1121.5072 | 7.0836 | Degrades components of the extracellular matrix, involved in tissue remodeling and repair |
| Aebp1 | Q640N1 | Adipocyte enhancer-binding protein 1 | 764.6664 | 110.9697 | 6.8908 | Associated with cell proliferation, differentiation, and apoptosis |
|  | P01660 | Ig kappa chain V-III region PC 3741/TEPC 111 | 1228.8396 | 183.6962 | 6.6895 | Part of an immunoglobulin involved in immune response |
| Serpina3n | Q91WP6 | Serine protease inhibitor A3N | 47979.9827 | 7220.7705 | 6.6447 | Inhibits proteases, involved in inflammation regulation and apoptosis control |

**Supplementary Table 2. Top 20 down-regulated proteins in wild type mice, 7 days after bleomycin treatment.**

| GeneName | Accession | Description | MEAN WT_Day7 | MEAN WT_ Day0 | FOLD CHANGE | Function |
| --- | --- | --- | --- | --- | --- | --- |
| Mup3 | P04939 | Major urinary protein 3 | 227.9674 | 1764.1051 | 0.1292 | A pheromone carrier protein that may be involved in chemical communication between individuals of the same species |
| Bphl | Q8R164 | Valacyclovir hydrolase | 82.4839 | 625.9967 | 0.1318 | Hydrolyzes valacyclovir to acyclovir, an antiviral drug |
| Adam22 | Q9R1V6 | Disintegrin and metalloproteinase domain-containing protein 22 | 115.7759 | 794.8639 | 0.1457 | Involved in extracellular matrix degradation and tissue remodeling |
| Rsph4a | Q8BYM7 | Radial spoke head protein 4 homolog A | 31.2521 | 211.0952 | 0.1480 | May be involved in the structural organization of the cytoskeleton, particularly in cilia and flagella |
| Sult1d1 | Q3UZZ6 | Sulfotransferase 1 family member D1 | 872.8533 | 5632.2656 | 0.1550 | Catalyzes the sulfate conjugation of various molecules, which can affect their activity, stability, and cellular localization |
| Prdx6 | O08709 | Peroxiredoxin-6 | 2528.5485 | 16019.7811 | 0.1578 | A thiol-specific peroxidase that scavenges hydrogen peroxide and protects cells from oxidative damage |
| Clic6 | Q8BHB9 | Chloride intracellular channel protein 6 | 768.6583 | 4871.4052 | 0.1578 | Involved in the regulation of chloride ion transport across cellular membranes |
| Hadh | Q61425 | Hydroxyacyl-coenzyme A dehydrogenase, mitochondrial | 595.1439 | 3752.1017 | 0.1586 | Participates in the beta-oxidation of fatty acids, catalyzing the oxidation of L-3-hydroxyacyl-CoA |
| Ifi30 | Q9ESY9 | Gamma-interferon-inducible lysosomal thiol reductase | 124.9091 | 786.7286 | 0.1588 | Reduces disulfide bonds within lysosomes, important for the function of lysosomal enzymes |
| Npc1 | O35604 | NPC intracellular cholesterol transporter 1 | 148.6942 | 900.5411 | 0.1651 | Facilitates the transport of cholesterol between organelles, particularly between the endoplasmic reticulum and the plasma membrane |
| Uqcrc1 | Q9CZ13 | Cytochrome b-c1 complex subunit 1, mitochondrial | 212.3373 | 1214.5866 | 0.1748 | A component of the mitochondrial electron transport chain, involved in cellular respiration |
| Glrx5 | Q80Y14 | Glutaredoxin-related protein 5, mitochondrial | 67.8019 | 382.6167 | 0.1772 | Involved in the detoxification of reactive oxygen species and the maintenance of thiol/disulfide redox balance in mitochondria |
| Hmgn1 | P18608 | Non-histone chromosomal protein HMG-14 | 111.9363 | 629.5240 | 0.1778 | A chromatin-binding protein that can modulate DNA structure and transcription |
| Acot13 | Q9CQR4 | Acyl-coenzyme A thioesterase 13 | 182.8740 | 1000.9061 | 0.1827 | Involved in the hydrolysis of acyl-CoA thioesters, regulating fatty acid metabolism |
| Selenbp1 | P17563 | Methanethiol oxidase | 6294.0500 | 34416.7732 | 0.1829 | Catalyzes the oxidation of methanethiol to formaldehyde and hydrogen sulfide, playing a role in the metabolism of sulfur-containing compounds |
| Creg1 | O88668 | Protein CREG1 | 84.2987 | 453.0816 | 0.1861 | Cysteine-rich glioma-inactivated protein 1, involved in the inhibition of glioma cell proliferation and tumor growth |
| Crip1 | P63254 | Cysteine-rich protein 1 | 184.8903 | 990.7523 | 0.1866 | May have a role in cell adhesion, signaling, or structural support, though its specific function can vary |
| Dtd1 | Q9DD18 | D-aminoacyl-tRNA deacylase 1 | 48.4967 | 256.2793 | 0.1892 | Catalyzes the removal of D-amino acids from mischarged tRNAs, preventing their incorporation into proteins |
| Msi2 | Q920Q6 | RNA-binding protein Musashi homolog 2 | 55.0711 | 287.4056 | 0.1916 | Involved in RNA processing and regulation of gene expression, often associated with stem cell maintenance and neural development |
| Hspa1a | Q61696 | Heat shock 70 kDa protein 1A | 792.1920 | 4133.2403 | 0.1917 | A molecular chaperone that helps protect cells from stress and aids in the proper folding of proteins |

**Supplementary Table 3. Top 20 up-regulated proteins in DFTKO mice as compared to wild type mice.** Data were 7 days after bleomycin treatment.

| GeneName | Accession | Description | MEAN DFTKO_Day7 | MEAN WT_Day7 | FOLD CHANGE | Function |
| --- | --- | --- | --- | --- | --- | --- |
| S100a8 | P27005 | Protein S100-A8 | 3695.1448 | 568.8543 | 6.4958 | A calcium-binding protein involved in inflammation, cell proliferation, and the regulation of immune responses |
| Tg | O08710 | Thyroglobulin | 4896.1662 | 807.4147 | 6.0640 | A large glycoprotein precursor to thyroid hormones, which is stored in the thyroid follicles and is essential for the synthesis of thyroxine (T4) and triiodothyronine (T3) |
| Hdgfl3 | Q9JMG7 | Hepatoma-derived growth factor-related protein 3 | 96.2000 | 24.2593 | 3.9655 | Involved in cell growth, differentiation, and tissue development, but its exact function is not well understood |
| H3c1 | P68433 | Histone H3.1 | 11748.5721 | 3212.2411 | 3.6574 | A variant of histone H3 that is involved in the packaging of DNA into nucleosomes and the regulation of gene expression |
| S100a9 | P31725 | Protein S100-A9 | 2912.0454 | 851.9405 | 3.4181 | A calcium-binding protein that often forms a complex with S100-A8 and is involved in the regulation of inflammatory processes and the immune response |
| Mob1b | Q8BPB0 | MOB kinase activator 1B | 251.8264 | 74.3012 | 3.3893 | Involved in the regulation of the Rho GTPase pathway, which is important for cytoskeletal reorganization and cell motility |
| H2ax | P27661 | Histone H2AX | 3367.7558 | 1034.7064 | 3.2548 | A variant of histone H2A that plays a role in DNA damage repair and the maintenance of genomic stability |
| Plekhf2 | Q91WB4 | Pleckstrin homology domain-containing family F member 2 | 151.3072 | 50.8050 | 2.9782 | Involved in signal transduction pathways that regulate cell growth, migration, and apoptosis |
| Ssbp1 | Q9CYR0 | Single-stranded DNA-binding protein, mitochondrial | 113.3730 | 38.3113 | 2.9593 | Binds to single-stranded DNA and is involved in mitochondrial DNA replication and repair |
| Ceacam1 | P31809 | Carcinoembryonic antigen-related cell adhesion molecule 1 | 235.7469 | 80.4165 | 2.9316 | A cell adhesion molecule that is involved in cell signaling and the regulation of cell adhesion and migration |
| Hmga1 | P17095 | High mobility group protein HMG-I/HMG-Y | 603.4526 | 212.1615 | 2.8443 | A chromatin-binding protein that can alter DNA structure and is involved in the regulation of gene expression |
| Cygb | Q9CX80 | Cytoglobin | 213.0274 | 75.9760 | 2.8039 | A hemoglobin-like protein that may have a role in oxygen transport or scavenging of reactive oxygen species in the cytoplasm |
| H1-2 | P15864 | Histone H1.2 | 1299.7093 | 468.8985 | 2.7718 | A variant of linker histone H1 that helps to compact chromatin and regulate gene expression |
| Hikeshi | Q9DD02 | Protein Hikeshi | 136.7974 | 51.0125 | 2.6816 | Involved in the transport of mRNA from the nucleus to the cytoplasm, which is important for gene expression |
| Hbb-b2 | P02089 | Hemoglobin subunit beta-2 | 5729.5608 | 2178.7532 | 2.6297 | A component of hemoglobin that binds oxygen and facilitates its transport in the blood |
| Mup20 | Q5FW60 | Major urinary protein 20 | 222.0790 | 84.9994 | 2.6127 | A pheromone carrier protein that may be involved in chemical communication between individuals of the same species |
| Ipo9 | Q91YE6 | Importin-9 | 592.3013 | 229.4959 | 2.5809 | A nuclear transport receptor that mediates the import of proteins into the nucleus |
| Vnn1 | Q9Z0K8 | Pantetheinase | 236.0270 | 92.3270 | 2.5564 | An enzyme that hydrolyzes pantetheine to pantothenic acid (vitamin B5) and cysteamine, which are important for various metabolic processes |
| Gpnmb | Q99P91 | Transmembrane glycoprotein NMB | 175.3485 | 68.9475 | 2.5432 | A cell surface protein that may be involved in cell adhesion and signaling, its exact function is not well characterized |
| Slc44a4 | Q91VA1 | Choline transporter-like protein 4 | 1556.6290 | 613.2239 | 2.5384 | A sodium-dependent transmembrane transport protein involved in the uptake of choline in non-neuronal cells |

**Supplemental Table 4. Top 20 down-regulated proteins in DFTKO mice as compared to wild type mice.** Data were 7 days after bleomycin treatment.

| GeneName | Accession | Description | MEAN DFTKO_Day7 | MEAN WT_Day7 | FOLD CHANGE | Function |
| --- | --- | --- | --- | --- | --- | --- |
| Ddt | O35215 | D-dopachrome decarboxylase | 243.6038 | 1172.8787 | 0.2076 | An enzyme that catalyzes the conversion of D-dopachrome to 5,6-dihydroxyindole. |
| Uckl1 | Q91YL3 | Uridine-cytidine kinase-like 1 | 48.1508 | 176.4832 | 0.2728 | Involved in nucleotide salvage pathways and possibly in tumor suppression |
| Gsta4 | P24472 | Glutathione S-transferase A4 | 252.3965 | 901.0105 | 0.2801 | Detoxifies electrophiles and peroxidases glutathione |
| Ces1 | Q8VCC2 | Liver carboxylesterase 1 | 80.5469 | 282.2408 | 0.2854 | Enzyme involved in the hydrolysis of ester bonds in lipids |
| Cnn3 | Q9DAW9 | Calponin-3 | 137.4990 | 401.7198 | 0.3423 | Regulates smooth muscle contraction and cytoskeleton organization |
| Ehd2 | Q8BH64 | EH domain-containing protein 2 | 550.5545 | 1561.3009 | 0.3526 | Involved in endocytic trafficking and cargo selection |
| Cnpy2 | Q9QXT0 | Protein canopy homolog 2 | 37.8112 | 107.1069 | 0.3530 | Involved in cell adhesion and possibly in signal transduction |
| Ndufs6 | P52503 | NADH dehydrogenase [ubiquinone] iron-sulfur protein 6, mitochondrial | 15.0445 | 42.5352 | 0.3537 | Component of the electron transport chain in mitochondria |
| Aldh1a7 | O35945 | Aldehyde dehydrogenase, cytosolic 1 | 704.8342 | 1922.7322 | 0.3666 | Converts aldehydes to acids, part of alcohol metabolism |
| Nectin3 | Q9JLB9 | Nectin-3 | 69.7045 | 178.1826 | 0.3912 | Cell adhesion molecule involved in cell junction formation |
| Rreb1 | Q3UH06 | Ras-responsive element-binding protein 1 | 50.4935 | 123.6830 | 0.4082 | Binds to specific DNA sequences in response to Ras activation |
| Oxr1 | Q4KMM3 | Oxidation resistance protein 1 | 145.1301 | 342.3352 | 0.4239 | Protects against oxidative stress |
| Stk39 | Q9Z1W9 | STE20/SPS1-related proline-alanine-rich protein kinase | 32.2899 | 75.3231 | 0.4287 | Involved in cell cycle progression and cytokinesis |
| Rab32 | Q9CZE3 | Ras-related protein Rab-32 | 53.9507 | 122.4947 | 0.4404 | Involved in vesicle trafficking and membrane transport |
| Cab39l | Q9DB16 | Calcium-binding protein 39-like | 373.3031 | 843.9427 | 0.4423 | Binds calcium ions, possibly involved in cellular processes like signaling and metabolism |
| Ilkap | Q8R0F6 | Integrin-linked kinase-associated serine/threonine phosphatase 2C | 41.2168 | 83.4846 | 0.4937 | Regulates integrin-mediated signaling and actin dynamics |
| Nagk | Q9QZ08 | N-acetyl-D-glucosamine kinase | 258.9959 | 523.3978 | 0.4948 | Catalyzes phosphorylation of N-acetylglucosamine |
| Armc1 | Q9D7A8 | Armadillo repeat-containing protein 1 | 54.0598 | 108.7117 | 0.4973 | Involved in cell signaling and cytoskeletal organization |
| Ctps1 | P70698 | CTP synthase 1 | 812.6357 | 1621.5084 | 0.5012 | Converts UTP to CTP, crucial for nucleotide synthesis |
| Mt1 | P02802 | Metallothionein-1 | 116.9364 | 232.6237 | 0.5027 | Binds heavy metals and detoxifies them; also has antioxidant properties |
